# Supplementary material for: Transcriptome Sequencing and De Novo Analysis for Ma Bamboo (Dendrocalamus latiflorus Munro) Using the Illumina Platform
Source: PLoS One. 2012 Oct 3;7(10):e46766. doi: 10.1371/journal.pone.0046766 (PMC3463524; doi:10.1371/journal.pone.0046766)
Supplement: Table S3 — KEGG biochemical mappings for Dendrocalamus latiflorus Munro. (XLSX) [file pone.0046766.s003.xlsx]

## Sheet: Munro_Bamboo_unigene.path
#pathway	pathway_id	Gene_number	Gene_id	KOs
ABC transporters	29	Munro_Bamboo_unigene_BMK_10754;Munro_Bamboo_unigene_BMK_10755;Munro_Bamboo_unigene_BMK_10796;Munro_Bamboo_unigene_BMK_13245;Munro_Bamboo_unigene_BMK_15002;Munro_Bamboo_unigene_BMK_18521;Munro_Bamboo_unigene_BMK_18931;Munro_Bamboo_unigene_BMK_22262;Munro_Bamboo_unigene_BMK_28562;Munro_Bamboo_unigene_BMK_304;Munro_Bamboo_unigene_BMK_305;Munro_Bamboo_unigene_BMK_30900;Munro_Bamboo_unigene_BMK_31295;…	K05658+K05658+K05658+K05674+K05658+K05658+K05658+K05658+K05658+K05658+K05658+K05674+K05658+K05658+K05658+K05658+K05658+K05674+K05658+K05658+K05658+K05674+K05658+K05658+K05658+K05658+K05658+K05658+K05658
Acute myeloid leukemia	25	Munro_Bamboo_unigene_BMK_10992;Munro_Bamboo_unigene_BMK_13872;Munro_Bamboo_unigene_BMK_15796;Munro_Bamboo_unigene_BMK_17186;Munro_Bamboo_unigene_BMK_24620;Munro_Bamboo_unigene_BMK_25793;Munro_Bamboo_unigene_BMK_27108;Munro_Bamboo_unigene_BMK_27565;Munro_Bamboo_unigene_BMK_31491;Munro_Bamboo_unigene_BMK_43994;Munro_Bamboo_unigene_BMK_46617;Munro_Bamboo_unigene_BMK_5118;Munro_Bamboo_unigene_BMK_511…	K04371+K07203+K04368+K04371+K04371+K04371+K04371+K04371+K04371+K07203+K07203+K04371+K04371+K04371+K07203+K07203+K07203+K07203+K04368+K04368+K04371+K07203+K07203+K07203+K04371
Adherens junction	70	Munro_Bamboo_unigene_BMK_10230;Munro_Bamboo_unigene_BMK_10376;Munro_Bamboo_unigene_BMK_10992;Munro_Bamboo_unigene_BMK_12168;Munro_Bamboo_unigene_BMK_12169;Munro_Bamboo_unigene_BMK_12381;Munro_Bamboo_unigene_BMK_12712;Munro_Bamboo_unigene_BMK_14854;Munro_Bamboo_unigene_BMK_15264;Munro_Bamboo_unigene_BMK_15446;Munro_Bamboo_unigene_BMK_15508;Munro_Bamboo_unigene_BMK_17186;Munro_Bamboo_unigene_BMK_17…	K03115+K05747+K04371+K03097+K03097+K04392+K05747+K04498+K05747+K04392+K04392+K04371+K04498+K04392+K04498+K04498+K04392+K03097+K04392+K03115+K04498+K03097+K04498+K04371+K04392+K04392+K04371+K04392+K04392+K04392+K04371+K04392+K04371+K04392+K03097+K04392+K04498+K04371+K04498+K03115+K03115+K04392+K04498+K04498+K04498+K04498+K05747+K04392+K04498+K04392+K03115+K04371+K04371+K04371+K03097+K04498+K04498+…
Adipocytokine signaling pathway	37	Munro_Bamboo_unigene_BMK_13872;Munro_Bamboo_unigene_BMK_16468;Munro_Bamboo_unigene_BMK_16806;Munro_Bamboo_unigene_BMK_17361;Munro_Bamboo_unigene_BMK_250;Munro_Bamboo_unigene_BMK_2661;Munro_Bamboo_unigene_BMK_27127;Munro_Bamboo_unigene_BMK_30204;Munro_Bamboo_unigene_BMK_35221;Munro_Bamboo_unigene_BMK_37525;Munro_Bamboo_unigene_BMK_37769;Munro_Bamboo_unigene_BMK_37843;Munro_Bamboo_unigene_BMK_38810…	K07203+K07198+K07199+K01897+K01897+K01897+K01897+K07198+K07297+K01897+K01897+K01897+K07198+K01897+K01897+K07203+K07297+K07203+K01897+K07297+K07297+K07203+K07203+K07203+K01897+K07203+K01897+K07297+K01897+K07199+K07203+K01897+K01897+K07203+K07203+K01897+K07199
African trypanosomiasis	8	Munro_Bamboo_unigene_BMK_17420;Munro_Bamboo_unigene_BMK_18500;Munro_Bamboo_unigene_BMK_1903;Munro_Bamboo_unigene_BMK_21674;Munro_Bamboo_unigene_BMK_48234;Munro_Bamboo_unigene_BMK_59190;Munro_Bamboo_unigene_BMK_63067;Munro_Bamboo_unigene_BMK_63551;	K01354+K01392+K01404+K01404+K01354+K01392+K01392+K01404
Alanine, aspartate and glutamate metabolism	92	Munro_Bamboo_unigene_BMK_10169;Munro_Bamboo_unigene_BMK_11240;Munro_Bamboo_unigene_BMK_11550;Munro_Bamboo_unigene_BMK_11929;Munro_Bamboo_unigene_BMK_12323;Munro_Bamboo_unigene_BMK_1260;Munro_Bamboo_unigene_BMK_12771;Munro_Bamboo_unigene_BMK_14317;Munro_Bamboo_unigene_BMK_1438;Munro_Bamboo_unigene_BMK_14524;Munro_Bamboo_unigene_BMK_1494;Munro_Bamboo_unigene_BMK_15735;Munro_Bamboo_unigene_BMK_162;M…	K14455+K00261+K00827+K01939+K01915+K01915+K00264+K00830+K00262+K00264+K01939+K00764+K00135+K01953+K01955+K00827+K01755+K00813+K00261+K00827+K00827+K01915+K01756+K01756+K00264+K00264+K00764+K00294+K01940+K01940+K00264+K01580+K01580+K00814+K00262+K00264+K01915+K00262+K00764+K01953+K01953+K00814+K00261+K00278+K01580+K00814+K00764+K00813+K00814+K01955+K01953+K01580+K01580+K01580+K00264+K00264+K00820+…
Aldosterone-regulated sodium reabsorption	15	Munro_Bamboo_unigene_BMK_10992;Munro_Bamboo_unigene_BMK_17186;Munro_Bamboo_unigene_BMK_24620;Munro_Bamboo_unigene_BMK_25793;Munro_Bamboo_unigene_BMK_25873;Munro_Bamboo_unigene_BMK_27108;Munro_Bamboo_unigene_BMK_27565;Munro_Bamboo_unigene_BMK_31491;Munro_Bamboo_unigene_BMK_35257;Munro_Bamboo_unigene_BMK_5118;Munro_Bamboo_unigene_BMK_5119;Munro_Bamboo_unigene_BMK_51698;Munro_Bamboo_unigene_BMK_5956…	K04371+K04371+K04371+K04371+K06276+K04371+K04371+K04371+K06276+K04371+K04371+K04371+K04371+K06276+K04371
Alzheimer's disease	149	Munro_Bamboo_unigene_BMK_10210;Munro_Bamboo_unigene_BMK_10211;Munro_Bamboo_unigene_BMK_10220;Munro_Bamboo_unigene_BMK_10992;Munro_Bamboo_unigene_BMK_11062;Munro_Bamboo_unigene_BMK_11963;Munro_Bamboo_unigene_BMK_11968;Munro_Bamboo_unigene_BMK_11969;Munro_Bamboo_unigene_BMK_12091;Munro_Bamboo_unigene_BMK_12388;Munro_Bamboo_unigene_BMK_12510;Munro_Bamboo_unigene_BMK_12511;Munro_Bamboo_unigene_BMK_13…	K00413+K00413+K01408+K04371+K00134+K03942+K02138+K02138+K03955+K06268+K02267+K02267+K02126+K03941+K03941+K04371+K02133+K02183+K00419+K01408+K03955+K06268+K01408+K05853+K01408+K02256+K04371+K03943+K02267+K04371+K03937+K04371+K03946+K04371+K06268+K00134+K06171+K02265+K00134+K02133+K00134+K03963+K03963+K00134+K03965+K00134+K03938+K03938+K03083+K04371+K03945+K02128+K00411+K00134+K02138+K03945+K02266+…
Amino acid related enzymes	169	Munro_Bamboo_unigene_BMK_10022;Munro_Bamboo_unigene_BMK_10169;Munro_Bamboo_unigene_BMK_10271;Munro_Bamboo_unigene_BMK_10279;Munro_Bamboo_unigene_BMK_10318;Munro_Bamboo_unigene_BMK_10820;Munro_Bamboo_unigene_BMK_11099;Munro_Bamboo_unigene_BMK_11280;Munro_Bamboo_unigene_BMK_11281;Munro_Bamboo_unigene_BMK_11550;Munro_Bamboo_unigene_BMK_11703;Munro_Bamboo_unigene_BMK_11704;Munro_Bamboo_unigene_BMK_11…	K00654+K14455+K01866+K01872+K01867+K00815+K01883+K01889+K01889+K00827+K01873+K01873+K01873+K01868+K01869+K01762+K14270+K00654+K00830+K00826+K01868+K01762+K01874+K01889+K01869+K01868+K01869+K00827+K01868+K01872+K00826+K01889+K00813+K01869+K01874+K00817+K01872+K14270+K00827+K00827+K00815+K00826+K00654+K00818+K00826+K00826+K00826+K14270+K01876+K01887+K01883+K01845+K01886+K01893+K00826+K01890+K00654+…
Amino sugar and nucleotide sugar metabolism	187	Munro_Bamboo_unigene_BMK_10484;Munro_Bamboo_unigene_BMK_10912;Munro_Bamboo_unigene_BMK_12076;Munro_Bamboo_unigene_BMK_12150;Munro_Bamboo_unigene_BMK_12348;Munro_Bamboo_unigene_BMK_12349;Munro_Bamboo_unigene_BMK_12421;Munro_Bamboo_unigene_BMK_12446;Munro_Bamboo_unigene_BMK_12513;Munro_Bamboo_unigene_BMK_12663;Munro_Bamboo_unigene_BMK_1346;Munro_Bamboo_unigene_BMK_1612;Munro_Bamboo_unigene_BMK_1637…	K00963+K00975+K00844+K12450+K01810+K01810+K00972+K00963+K12449+K00975+K05305+K13648+K12448+K01784+K00770+K13648+K00975+K12373+K13648+K13648+K00012+K12446+K00963+K05305+K01810+K01810+K13648+K01183+K00971+K00971+K01840+K12451+K12373+K00770+K00972+K08679+K13648+K01183+K01183+K00847+K08679+K01810+K01183+K00849+K08679+K01784+K00975+K08679+K00975+K00975+K12446+K12446+K01183+K13648+K01810+K13648+K00975+…
Aminoacyl-tRNA biosynthesis	108	Munro_Bamboo_unigene_BMK_10271;Munro_Bamboo_unigene_BMK_10279;Munro_Bamboo_unigene_BMK_10318;Munro_Bamboo_unigene_BMK_11099;Munro_Bamboo_unigene_BMK_11280;Munro_Bamboo_unigene_BMK_11281;Munro_Bamboo_unigene_BMK_11703;Munro_Bamboo_unigene_BMK_11704;Munro_Bamboo_unigene_BMK_11705;Munro_Bamboo_unigene_BMK_1232;Munro_Bamboo_unigene_BMK_12441;Munro_Bamboo_unigene_BMK_1451;Munro_Bamboo_unigene_BMK_1462…	K01866+K01872+K01867+K01883+K01889+K01889+K01873+K01873+K01873+K01868+K01869+K14164+K01868+K01874+K01889+K01869+K01868+K01869+K01868+K01872+K01889+K01869+K01874+K01872+K01876+K01887+K01883+K00604+K01886+K01893+K01890+K01875+K01893+K01886+K00604+K02435+K01876+K01886+K01886+K01892+K01885+K01873+K01866+K04567+K04567+K01873+K01885+K01876+K01872+K01885+K01874+K01893+K01893+K01886+K01869+K01872+K01876+…
Aminobenzoate degradation	25	Munro_Bamboo_unigene_BMK_10564;Munro_Bamboo_unigene_BMK_12312;Munro_Bamboo_unigene_BMK_20098;Munro_Bamboo_unigene_BMK_20331;Munro_Bamboo_unigene_BMK_23439;Munro_Bamboo_unigene_BMK_26533;Munro_Bamboo_unigene_BMK_26730;Munro_Bamboo_unigene_BMK_26809;Munro_Bamboo_unigene_BMK_32144;Munro_Bamboo_unigene_BMK_39438;Munro_Bamboo_unigene_BMK_4348;Munro_Bamboo_unigene_BMK_45163;Munro_Bamboo_unigene_BMK_465…	K01101+K00120+K01101+K01113+K01113+K01501+K01692+K01101+K01501+K00517+K01501+K00517+K01101+K01512+K00517+K01113+K01113+K00517+K00517+K00517+K01692+K01501+K00517+K01692+K01692
Amoebiasis	7	Munro_Bamboo_unigene_BMK_1370;Munro_Bamboo_unigene_BMK_26158;Munro_Bamboo_unigene_BMK_30409;Munro_Bamboo_unigene_BMK_32461;Munro_Bamboo_unigene_BMK_34192;Munro_Bamboo_unigene_BMK_34309;Munro_Bamboo_unigene_BMK_41057;	K07887+K07897+K07897+K07887+K01476+K07897+K13963
Amyotrophic lateral sclerosis (ALS)	55	Munro_Bamboo_unigene_BMK_12365;Munro_Bamboo_unigene_BMK_12381;Munro_Bamboo_unigene_BMK_12388;Munro_Bamboo_unigene_BMK_12498;Munro_Bamboo_unigene_BMK_12499;Munro_Bamboo_unigene_BMK_1370;Munro_Bamboo_unigene_BMK_14594;Munro_Bamboo_unigene_BMK_15446;Munro_Bamboo_unigene_BMK_15508;Munro_Bamboo_unigene_BMK_18311;Munro_Bamboo_unigene_BMK_19398;Munro_Bamboo_unigene_BMK_20285;Munro_Bamboo_unigene_BMK_207…	K04565+K04392+K06268+K04565+K04565+K07887+K04565+K04392+K04392+K04392+K06268+K04392+K03781+K04392+K04392+K04392+K11518+K04392+K04392+K04392+K03781+K04392+K04392+K06268+K04392+K03781+K07887+K06268+K06268+K04392+K06268+K11518+K04565+K03781+K08738+K04392+K11518+K03781+K04392+K08738+K04392+K06268+K06268+K08738+K04392+K06268+K06268+K04392+K06268+K04565+K03781+K04392+K04565+K11518+K03781
Antigen processing and presentation	82	Munro_Bamboo_unigene_BMK_104;Munro_Bamboo_unigene_BMK_105;Munro_Bamboo_unigene_BMK_10847;Munro_Bamboo_unigene_BMK_11848;Munro_Bamboo_unigene_BMK_11849;Munro_Bamboo_unigene_BMK_11850;Munro_Bamboo_unigene_BMK_12315;Munro_Bamboo_unigene_BMK_13534;Munro_Bamboo_unigene_BMK_15555;Munro_Bamboo_unigene_BMK_16081;Munro_Bamboo_unigene_BMK_17541;Munro_Bamboo_unigene_BMK_17910;Munro_Bamboo_unigene_BMK_20566;…	K08054+K08054+K03283+K08064+K08064+K08064+K03283+K03283+K03283+K09489+K08057+K01369+K03283+K08054+K03283+K03283+K08059+K04079+K08059+K03283+K01369+K03283+K03283+K03283+K03283+K04079+K03283+K03283+K03283+K03283+K03283+K08065+K03283+K01369+K04079+K08064+K04079+K03283+K04079+K01369+K08057+K08054+K04079+K08054+K09489+K04079+K08064+K03283+K01369+K04079+K08054+K08057+K03283+K08054+K01369+K03283+K01369+…
Apoptosis	23	Munro_Bamboo_unigene_BMK_12388;Munro_Bamboo_unigene_BMK_13950;Munro_Bamboo_unigene_BMK_19398;Munro_Bamboo_unigene_BMK_1995;Munro_Bamboo_unigene_BMK_25641;Munro_Bamboo_unigene_BMK_27877;Munro_Bamboo_unigene_BMK_29677;Munro_Bamboo_unigene_BMK_32507;Munro_Bamboo_unigene_BMK_33260;Munro_Bamboo_unigene_BMK_34089;Munro_Bamboo_unigene_BMK_34435;Munro_Bamboo_unigene_BMK_36892;Munro_Bamboo_unigene_BMK_438…	K06268+K04728+K06268+K04728+K04728+K06268+K04728+K04728+K04728+K06268+K06268+K06268+K08738+K08738+K06268+K06268+K08738+K04728+K06268+K06268+K06268+K04728+K04733
Arachidonic acid metabolism	35	Munro_Bamboo_unigene_BMK_10228;Munro_Bamboo_unigene_BMK_12691;Munro_Bamboo_unigene_BMK_16805;Munro_Bamboo_unigene_BMK_21953;Munro_Bamboo_unigene_BMK_23609;Munro_Bamboo_unigene_BMK_24568;Munro_Bamboo_unigene_BMK_25537;Munro_Bamboo_unigene_BMK_25812;Munro_Bamboo_unigene_BMK_27186;Munro_Bamboo_unigene_BMK_29419;Munro_Bamboo_unigene_BMK_29582;Munro_Bamboo_unigene_BMK_33412;Munro_Bamboo_unigene_BMK_33…	K00432+K00432+K00681+K01047+K00432+K00681+K14674+K01047+K00681+K01047+K14674+K00432+K14674+K00681+K00432+K00681+K00432+K00432+K00681+K14674+K14674+K14674+K00432+K00432+K01047+K01047+K00432+K14674+K01047+K00681+K01254+K01254+K14674+K00432+K01254
Arginine and proline metabolism	124	Munro_Bamboo_unigene_BMK_10169;Munro_Bamboo_unigene_BMK_1041;Munro_Bamboo_unigene_BMK_11032;Munro_Bamboo_unigene_BMK_11055;Munro_Bamboo_unigene_BMK_11240;Munro_Bamboo_unigene_BMK_11701;Munro_Bamboo_unigene_BMK_11702;Munro_Bamboo_unigene_BMK_12096;Munro_Bamboo_unigene_BMK_12323;Munro_Bamboo_unigene_BMK_12350;Munro_Bamboo_unigene_BMK_12377;Munro_Bamboo_unigene_BMK_1260;Munro_Bamboo_unigene_BMK_1317…	K14455+K00620+K00128+K01438+K00261+K10536+K10536+K14085+K01915+K00797+K00128+K01915+K00128+K00472+K14682+K00472+K00262+K00472+K00472+K01611+K01611+K00128+K12657+K14085+K00472+K01755+K00813+K12657+K00261+K00472+K01915+K00818+K10536+K00145+K00128+K00294+K01940+K01940+K00930+K13427+K00262+K12657+K00472+K13427+K01915+K00797+K01476+K00262+K00472+K12657+K14677+K00145+K00128+K00261+K01583+K01583+K01583+…
Arrhythmogenic right ventricular cardiomyopathy (ARVC)	1	Munro_Bamboo_unigene_BMK_66793;	K05692
Ascorbate and aldarate metabolism	56	Munro_Bamboo_unigene_BMK_11032;Munro_Bamboo_unigene_BMK_11113;Munro_Bamboo_unigene_BMK_11506;Munro_Bamboo_unigene_BMK_12096;Munro_Bamboo_unigene_BMK_12377;Munro_Bamboo_unigene_BMK_13176;Munro_Bamboo_unigene_BMK_14364;Munro_Bamboo_unigene_BMK_16314;Munro_Bamboo_unigene_BMK_17388;Munro_Bamboo_unigene_BMK_17641;Munro_Bamboo_unigene_BMK_19825;Munro_Bamboo_unigene_BMK_19859;Munro_Bamboo_unigene_BMK_20…	K00128+K14190+K00434+K14085+K00128+K00128+K00434+K00434+K00434+K00128+K14085+K00012+K14190+K00434+K00434+K00434+K08232+K08232+K00434+K14190+K00128+K08232+K08232+K14190+K00128+K00434+K14190+K00225+K00434+K00434+K14190+K00064+K08232+K00012+K00469+K00434+K00434+K00225+K00128+K10046+K00128+K00434+K08232+K00064+K00128+K00434+K00423+K00128+K00423+K00128+K10047+K14085+K00434+K00434+K10046+K08232
Axon guidance	55	Munro_Bamboo_unigene_BMK_10992;Munro_Bamboo_unigene_BMK_12381;Munro_Bamboo_unigene_BMK_12388;Munro_Bamboo_unigene_BMK_13792;Munro_Bamboo_unigene_BMK_15446;Munro_Bamboo_unigene_BMK_15508;Munro_Bamboo_unigene_BMK_17186;Munro_Bamboo_unigene_BMK_18311;Munro_Bamboo_unigene_BMK_19398;Munro_Bamboo_unigene_BMK_20285;Munro_Bamboo_unigene_BMK_21706;Munro_Bamboo_unigene_BMK_23467;Munro_Bamboo_unigene_BMK_24…	K04371+K04392+K06268+K05765+K04392+K04392+K04371+K04392+K06268+K04392+K04392+K05765+K04371+K04392+K04392+K04371+K04392+K04392+K04392+K04371+K04392+K04371+K04392+K06268+K04392+K03083+K04371+K06268+K06268+K04392+K06268+K05765+K04392+K05765+K05765+K03083+K04392+K03083+K04371+K04371+K04371+K05765+K04392+K05765+K06268+K06268+K05765+K04371+K04392+K06268+K06268+K04392+K06268+K04392+K04371
B cell receptor signaling pathway	50	Munro_Bamboo_unigene_BMK_10992;Munro_Bamboo_unigene_BMK_12381;Munro_Bamboo_unigene_BMK_12388;Munro_Bamboo_unigene_BMK_15446;Munro_Bamboo_unigene_BMK_15508;Munro_Bamboo_unigene_BMK_15796;Munro_Bamboo_unigene_BMK_17186;Munro_Bamboo_unigene_BMK_18311;Munro_Bamboo_unigene_BMK_19398;Munro_Bamboo_unigene_BMK_20285;Munro_Bamboo_unigene_BMK_21706;Munro_Bamboo_unigene_BMK_24620;Munro_Bamboo_unigene_BMK_24…	K04371+K04392+K06268+K04392+K04392+K04368+K04371+K04392+K06268+K04392+K04392+K04371+K04392+K04392+K04371+K04392+K04392+K04392+K04371+K04392+K04371+K04392+K06268+K04392+K03083+K04371+K06268+K06268+K04392+K06268+K04392+K03083+K04392+K03083+K04371+K04371+K04371+K04392+K04368+K04368+K06268+K06268+K04371+K04392+K06268+K06268+K04392+K06268+K04392+K04371
Bacterial invasion of epithelial cells	44	Munro_Bamboo_unigene_BMK_10376;Munro_Bamboo_unigene_BMK_11103;Munro_Bamboo_unigene_BMK_12381;Munro_Bamboo_unigene_BMK_12485;Munro_Bamboo_unigene_BMK_12486;Munro_Bamboo_unigene_BMK_12712;Munro_Bamboo_unigene_BMK_15264;Munro_Bamboo_unigene_BMK_15446;Munro_Bamboo_unigene_BMK_15508;Munro_Bamboo_unigene_BMK_16627;Munro_Bamboo_unigene_BMK_18311;Munro_Bamboo_unigene_BMK_18921;Munro_Bamboo_unigene_BMK_20…	K05747+K05755+K04392+K05758+K05758+K05747+K05747+K04392+K04392+K13728+K04392+K05758+K04392+K05758+K04392+K04392+K04392+K05757+K04392+K04392+K04392+K04392+K04392+K04392+K01528+K04392+K05747+K04646+K04392+K04392+K05758+K05756+K05758+K04392+K01528+K05757+K05754+K05758+K05747+K04392+K04392+K04392+K05692+K05757
Bacterial secretion system	32	Munro_Bamboo_unigene_BMK_10054;Munro_Bamboo_unigene_BMK_12006;Munro_Bamboo_unigene_BMK_12591;Munro_Bamboo_unigene_BMK_12592;Munro_Bamboo_unigene_BMK_12593;Munro_Bamboo_unigene_BMK_14230;Munro_Bamboo_unigene_BMK_15314;Munro_Bamboo_unigene_BMK_18091;Munro_Bamboo_unigene_BMK_18829;Munro_Bamboo_unigene_BMK_20690;Munro_Bamboo_unigene_BMK_23602;Munro_Bamboo_unigene_BMK_23947;Munro_Bamboo_unigene_BMK_23…	K03110+K03217+K03106+K03106+K03106+K03106+K03106+K03118+K03070+K03070+K03217+K03070+K03070+K03116+K03217+K03070+K03106+K03070+K03217+K03217+K03070+K03106+K03217+K03070+K03217+K03118+K03070+K03217+K03106+K03217+K03070+K03217
Bacterial toxins	16	Munro_Bamboo_unigene_BMK_13741;Munro_Bamboo_unigene_BMK_16859;Munro_Bamboo_unigene_BMK_22655;Munro_Bamboo_unigene_BMK_30895;Munro_Bamboo_unigene_BMK_31659;Munro_Bamboo_unigene_BMK_32427;Munro_Bamboo_unigene_BMK_33104;Munro_Bamboo_unigene_BMK_34359;Munro_Bamboo_unigene_BMK_42031;Munro_Bamboo_unigene_BMK_43563;Munro_Bamboo_unigene_BMK_45209;Munro_Bamboo_unigene_BMK_47723;Munro_Bamboo_unigene_BMK_56…	K06442+K01114+K01114+K01114+K01114+K06442+K01114+K01114+K01114+K01114+K01114+K01114+K06442+K01114+K01114+K01114
Basal cell carcinoma	11	Munro_Bamboo_unigene_BMK_2467;Munro_Bamboo_unigene_BMK_30342;Munro_Bamboo_unigene_BMK_31480;Munro_Bamboo_unigene_BMK_47857;Munro_Bamboo_unigene_BMK_48864;Munro_Bamboo_unigene_BMK_49077;Munro_Bamboo_unigene_BMK_54525;Munro_Bamboo_unigene_BMK_61658;Munro_Bamboo_unigene_BMK_64866;Munro_Bamboo_unigene_BMK_7421;Munro_Bamboo_unigene_BMK_7422;	K06228+K06228+K03083+K03083+K03083+K06228+K06228+K06228+K06228+K06228+K06228
Basal transcription factors	75	Munro_Bamboo_unigene_BMK_10540;Munro_Bamboo_unigene_BMK_10929;Munro_Bamboo_unigene_BMK_1114;Munro_Bamboo_unigene_BMK_11231;Munro_Bamboo_unigene_BMK_11232;Munro_Bamboo_unigene_BMK_11233;Munro_Bamboo_unigene_BMK_11405;Munro_Bamboo_unigene_BMK_11587;Munro_Bamboo_unigene_BMK_11588;Munro_Bamboo_unigene_BMK_12247;Munro_Bamboo_unigene_BMK_12507;Munro_Bamboo_unigene_BMK_12750;Munro_Bamboo_unigene_BMK_138…	K03125+K14535+K03143+K03123+K03123+K03123+K02202+K03120+K03120+K03144+K10844+K10843+K03130+K03130+K03143+K10845+K10844+K03127+K03130+K03136+K03131+K03135+K03131+K03125+K03141+K03125+K03134+K03143+K03126+K03125+K06634+K03135+K03124+K03133+K10844+K03126+K03133+K03144+K03143+K03144+K03144+K03131+K03120+K03125+K03125+K03144+K03131+K03122+K03126+K03125+K03128+K03125+K03142+K03126+K03139+K03126+K03139+…
Base excision repair	85	Munro_Bamboo_unigene_BMK_10024;Munro_Bamboo_unigene_BMK_10518;Munro_Bamboo_unigene_BMK_12081;Munro_Bamboo_unigene_BMK_14282;Munro_Bamboo_unigene_BMK_14566;Munro_Bamboo_unigene_BMK_18221;Munro_Bamboo_unigene_BMK_18717;Munro_Bamboo_unigene_BMK_1933;Munro_Bamboo_unigene_BMK_21529;Munro_Bamboo_unigene_BMK_21780;Munro_Bamboo_unigene_BMK_22024;Munro_Bamboo_unigene_BMK_22380;Munro_Bamboo_unigene_BMK_237…	K10803+K10773+K02325+K10747+K01246+K01246+K10798+K02327+K10801+K01247+K02324+K02335+K10773+K01246+K10773+K01142+K03575+K02324+K03504+K10798+K03575+K02324+K10563+K10563+K03512+K02327+K01246+K01246+K01247+K10773+K01246+K10798+K10772+K02328+K01246+K02335+K01246+K10747+K03648+K10802+K01246+K01142+K03575+K02328+K02325+K01246+K03660+K10772+K03648+K10773+K10773+K10798+K01142+K01247+K10563+K03648+K02325+…
Benzoate degradation	16	Munro_Bamboo_unigene_BMK_1153;Munro_Bamboo_unigene_BMK_16765;Munro_Bamboo_unigene_BMK_26730;Munro_Bamboo_unigene_BMK_3147;Munro_Bamboo_unigene_BMK_38125;Munro_Bamboo_unigene_BMK_41092;Munro_Bamboo_unigene_BMK_42697;Munro_Bamboo_unigene_BMK_47272;Munro_Bamboo_unigene_BMK_50316;Munro_Bamboo_unigene_BMK_56945;Munro_Bamboo_unigene_BMK_58550;Munro_Bamboo_unigene_BMK_59897;Munro_Bamboo_unigene_BMK_6381…	K00626+K00074+K01692+K00074+K00626+K07513+K00626+K00074+K07513+K00074+K00626+K01692+K07513+K00626+K01692+K01692
Benzoxazinoid biosynthesis	4	Munro_Bamboo_unigene_BMK_17633;Munro_Bamboo_unigene_BMK_24730;Munro_Bamboo_unigene_BMK_29328;Munro_Bamboo_unigene_BMK_34789;	K13222+K13222+K13223+K13222
Bile secretion	29	Munro_Bamboo_unigene_BMK_10754;Munro_Bamboo_unigene_BMK_10755;Munro_Bamboo_unigene_BMK_10796;Munro_Bamboo_unigene_BMK_15002;Munro_Bamboo_unigene_BMK_18521;Munro_Bamboo_unigene_BMK_18931;Munro_Bamboo_unigene_BMK_22262;Munro_Bamboo_unigene_BMK_28562;Munro_Bamboo_unigene_BMK_304;Munro_Bamboo_unigene_BMK_305;Munro_Bamboo_unigene_BMK_31295;Munro_Bamboo_unigene_BMK_37054;Munro_Bamboo_unigene_BMK_37378;…	K05658+K05658+K05658+K05658+K05658+K05658+K05658+K05658+K05658+K05658+K05658+K05658+K05658+K00021+K05658+K00021+K05658+K00021+K05658+K05658+K05658+K05658+K05658+K05658+K05658+K00021+K05658+K05658+K05658
Biosynthesis of ansamycins	2	Munro_Bamboo_unigene_BMK_52371;Munro_Bamboo_unigene_BMK_58058;	K00615+K00615
Biosynthesis of unsaturated fatty acids	58	Munro_Bamboo_unigene_BMK_10537;Munro_Bamboo_unigene_BMK_10946;Munro_Bamboo_unigene_BMK_13030;Munro_Bamboo_unigene_BMK_14130;Munro_Bamboo_unigene_BMK_14896;Munro_Bamboo_unigene_BMK_16122;Munro_Bamboo_unigene_BMK_16944;Munro_Bamboo_unigene_BMK_19561;Munro_Bamboo_unigene_BMK_23411;Munro_Bamboo_unigene_BMK_26928;Munro_Bamboo_unigene_BMK_31471;Munro_Bamboo_unigene_BMK_3194;Munro_Bamboo_unigene_BMK_327…	K10703+K10251+K00507+K00232+K10257+K00232+K10703+K00232+K03921+K00059+K00232+K00232+K00059+K00232+K00059+K00059+K10703+K03921+K03921+K00507+K03921+K00232+K07513+K03921+K00232+K10257+K00059+K03921+K10703+K03921+K07513+K03921+K10703+K00232+K03921+K03921+K03921+K00507+K03921+K00059+K10258+K03921+K00059+K00507+K00232+K10255+K10257+K10257+K03921+K00232+K07513+K10257+K10703+K10257+K00232+K03921+K10257+…
Biotin metabolism	6	Munro_Bamboo_unigene_BMK_11876;Munro_Bamboo_unigene_BMK_30997;Munro_Bamboo_unigene_BMK_34392;Munro_Bamboo_unigene_BMK_62125;Munro_Bamboo_unigene_BMK_7471;Munro_Bamboo_unigene_BMK_7699;	K01012+K00833+K00833+K01012+K00833+K00652
Bisphenol degradation	8	Munro_Bamboo_unigene_BMK_12312;Munro_Bamboo_unigene_BMK_39438;Munro_Bamboo_unigene_BMK_45163;Munro_Bamboo_unigene_BMK_5107;Munro_Bamboo_unigene_BMK_57066;Munro_Bamboo_unigene_BMK_58693;Munro_Bamboo_unigene_BMK_59225;Munro_Bamboo_unigene_BMK_9033;	K00120+K00517+K00517+K00517+K00517+K00517+K00517+K00517
Bladder cancer	16	Munro_Bamboo_unigene_BMK_10992;Munro_Bamboo_unigene_BMK_15796;Munro_Bamboo_unigene_BMK_17186;Munro_Bamboo_unigene_BMK_24620;Munro_Bamboo_unigene_BMK_25793;Munro_Bamboo_unigene_BMK_27108;Munro_Bamboo_unigene_BMK_27565;Munro_Bamboo_unigene_BMK_31491;Munro_Bamboo_unigene_BMK_34826;Munro_Bamboo_unigene_BMK_5118;Munro_Bamboo_unigene_BMK_5119;Munro_Bamboo_unigene_BMK_51698;Munro_Bamboo_unigene_BMK_5697…	K04371+K04368+K04371+K04371+K04371+K04371+K04371+K04371+K06620+K04371+K04371+K04371+K04368+K04368+K04371+K04371
Brassinosteroid biosynthesis	11	Munro_Bamboo_unigene_BMK_19663;Munro_Bamboo_unigene_BMK_19674;Munro_Bamboo_unigene_BMK_22805;Munro_Bamboo_unigene_BMK_25827;Munro_Bamboo_unigene_BMK_30956;Munro_Bamboo_unigene_BMK_34633;Munro_Bamboo_unigene_BMK_40752;Munro_Bamboo_unigene_BMK_44075;Munro_Bamboo_unigene_BMK_46518;Munro_Bamboo_unigene_BMK_59137;Munro_Bamboo_unigene_BMK_65198;	K09591+K09588+K09591+K09591+K12639+K09587+K09588+K12639+K12639+K09588+K09588
Butanoate metabolism	50	Munro_Bamboo_unigene_BMK_10289;Munro_Bamboo_unigene_BMK_10290;Munro_Bamboo_unigene_BMK_1153;Munro_Bamboo_unigene_BMK_11805;Munro_Bamboo_unigene_BMK_11913;Munro_Bamboo_unigene_BMK_16052;Munro_Bamboo_unigene_BMK_162;Munro_Bamboo_unigene_BMK_16765;Munro_Bamboo_unigene_BMK_24873;Munro_Bamboo_unigene_BMK_26730;Munro_Bamboo_unigene_BMK_28197;Munro_Bamboo_unigene_BMK_28606;Munro_Bamboo_unigene_BMK_3051;…	K00162+K00162+K00626+K01641+K00161+K00161+K00135+K00074+K01640+K01692+K00161+K01652+K01580+K01580+K01652+K00074+K00162+K00626+K01640+K01580+K00626+K01640+K01580+K01580+K01580+K01580+K01641+K00074+K01640+K01653+K00161+K01641+K00161+K00074+K01640+K01580+K00626+K01692+K01580+K01580+K01641+K01580+K00161+K01580+K01580+K00161+K00161+K00626+K01692+K01692
Butirosin and neomycin biosynthesis	20	Munro_Bamboo_unigene_BMK_12076;Munro_Bamboo_unigene_BMK_31511;Munro_Bamboo_unigene_BMK_34959;Munro_Bamboo_unigene_BMK_40024;Munro_Bamboo_unigene_BMK_40353;Munro_Bamboo_unigene_BMK_41676;Munro_Bamboo_unigene_BMK_45134;Munro_Bamboo_unigene_BMK_47768;Munro_Bamboo_unigene_BMK_51692;Munro_Bamboo_unigene_BMK_51862;Munro_Bamboo_unigene_BMK_54568;Munro_Bamboo_unigene_BMK_554;Munro_Bamboo_unigene_BMK_5723…	K00844+K00844+K00844+K00844+K00844+K00844+K00844+K00844+K00844+K00844+K00844+K00844+K00844+K00844+K00844+K00844+K00844+K00844+K00844+K00844
C5-Branched dibasic acid metabolism	5	Munro_Bamboo_unigene_BMK_28606;Munro_Bamboo_unigene_BMK_3084;Munro_Bamboo_unigene_BMK_31819;Munro_Bamboo_unigene_BMK_48663;Munro_Bamboo_unigene_BMK_61229;	K01652+K01652+K01704+K01653+K01703
Caffeine metabolism	7	Munro_Bamboo_unigene_BMK_18666;Munro_Bamboo_unigene_BMK_29317;Munro_Bamboo_unigene_BMK_45196;Munro_Bamboo_unigene_BMK_45462;Munro_Bamboo_unigene_BMK_57837;Munro_Bamboo_unigene_BMK_61414;Munro_Bamboo_unigene_BMK_63775;	K00106+K00106+K00106+K00365+K00106+K00106+K00365
Calcium signaling pathway	54	Munro_Bamboo_unigene_BMK_11645;Munro_Bamboo_unigene_BMK_11646;Munro_Bamboo_unigene_BMK_12388;Munro_Bamboo_unigene_BMK_12994;Munro_Bamboo_unigene_BMK_14109;Munro_Bamboo_unigene_BMK_18672;Munro_Bamboo_unigene_BMK_19226;Munro_Bamboo_unigene_BMK_19398;Munro_Bamboo_unigene_BMK_20679;Munro_Bamboo_unigene_BMK_2129;Munro_Bamboo_unigene_BMK_2269;Munro_Bamboo_unigene_BMK_26349;Munro_Bamboo_unigene_BMK_2787…	K05864+K05864+K06268+K05857+K05863+K02183+K05857+K06268+K05864+K05853+K04718+K05863+K06268+K05862+K05862+K05857+K06268+K06268+K05863+K05853+K05857+K05863+K02183+K02183+K06268+K05863+K05863+K05863+K05863+K05863+K05863+K05863+K05857+K05863+K05863+K02183+K05857+K05862+K05857+K05862+K05863+K05857+K06268+K06268+K02183+K05862+K06268+K06268+K06268+K05863+K05857+K05857+K05857+K05857
Caprolactam degradation	6	Munro_Bamboo_unigene_BMK_20356;Munro_Bamboo_unigene_BMK_26730;Munro_Bamboo_unigene_BMK_59897;Munro_Bamboo_unigene_BMK_59903;Munro_Bamboo_unigene_BMK_9266;Munro_Bamboo_unigene_BMK_9817;	K00002+K01692+K01692+K00002+K01692+K01692
Carbohydrate digestion and absorption	23	Munro_Bamboo_unigene_BMK_12076;Munro_Bamboo_unigene_BMK_18694;Munro_Bamboo_unigene_BMK_20197;Munro_Bamboo_unigene_BMK_31511;Munro_Bamboo_unigene_BMK_34959;Munro_Bamboo_unigene_BMK_40024;Munro_Bamboo_unigene_BMK_40353;Munro_Bamboo_unigene_BMK_41676;Munro_Bamboo_unigene_BMK_45134;Munro_Bamboo_unigene_BMK_47768;Munro_Bamboo_unigene_BMK_51692;Munro_Bamboo_unigene_BMK_51862;Munro_Bamboo_unigene_BMK_54…	K00844+K01176+K01176+K00844+K00844+K00844+K00844+K00844+K00844+K00844+K00844+K00844+K00844+K00844+K00844+K00844+K00844+K00844+K00844+K01176+K00844+K00844+K00844
Carbon fixation in photosynthetic organisms	149	Munro_Bamboo_unigene_BMK_112;Munro_Bamboo_unigene_BMK_11664;Munro_Bamboo_unigene_BMK_11786;Munro_Bamboo_unigene_BMK_1205;Munro_Bamboo_unigene_BMK_12341;Munro_Bamboo_unigene_BMK_13072;Munro_Bamboo_unigene_BMK_13090;Munro_Bamboo_unigene_BMK_13160;Munro_Bamboo_unigene_BMK_13251;Munro_Bamboo_unigene_BMK_13388;Munro_Bamboo_unigene_BMK_13593;Munro_Bamboo_unigene_BMK_1361;Munro_Bamboo_unigene_BMK_15321;…	K00025+K01602+K00029+K03841+K00026+K01602+K01595+K00927+K00025+K00026+K01595+K00026+K00029+K01623+K00026+K00873+K01100+K00026+K00927+K00855+K00028+K01623+K00029+K03841+K00813+K03841+K01783+K01595+K01595+K01595+K00029+K00927+K00029+K01807+K00026+K01602+K01610+K01623+K01595+K01623+K00026+K00855+K01610+K01595+K01623+K05298+K00814+K01602+K00029+K01783+K01783+K01595+K00873+K01595+K00026+K05298+K01595+…
Carbon fixation pathways in prokaryotes	50	Munro_Bamboo_unigene_BMK_10041;Munro_Bamboo_unigene_BMK_10042;Munro_Bamboo_unigene_BMK_10043;Munro_Bamboo_unigene_BMK_1153;Munro_Bamboo_unigene_BMK_13090;Munro_Bamboo_unigene_BMK_13593;Munro_Bamboo_unigene_BMK_15047;Munro_Bamboo_unigene_BMK_17703;Munro_Bamboo_unigene_BMK_21810;Munro_Bamboo_unigene_BMK_22178;Munro_Bamboo_unigene_BMK_22220;Munro_Bamboo_unigene_BMK_22762;Munro_Bamboo_unigene_BMK_269…	K01679+K01679+K01679+K00626+K01595+K01595+K01895+K01681+K01679+K01595+K01595+K01595+K01679+K01595+K00031+K01595+K01681+K01595+K01681+K01595+K01648+K01648+K01595+K00297+K01595+K01595+K01595+K00626+K01895+K01895+K01895+K01595+K01679+K00626+K01595+K01681+K01595+K01595+K01595+K00031+K00626+K01679+K01595+K01595+K01595+K01595+K00031+K00626+K01681+K01681
Cardiac muscle contraction	27	Munro_Bamboo_unigene_BMK_10210;Munro_Bamboo_unigene_BMK_10211;Munro_Bamboo_unigene_BMK_12510;Munro_Bamboo_unigene_BMK_12511;Munro_Bamboo_unigene_BMK_18802;Munro_Bamboo_unigene_BMK_23278;Munro_Bamboo_unigene_BMK_25481;Munro_Bamboo_unigene_BMK_28581;Munro_Bamboo_unigene_BMK_31914;Munro_Bamboo_unigene_BMK_33738;Munro_Bamboo_unigene_BMK_3563;Munro_Bamboo_unigene_BMK_39620;Munro_Bamboo_unigene_BMK_425…	K00413+K00413+K02267+K02267+K00419+K02256+K02267+K02265+K00411+K02266+K00411+K02267+K00411+K00417+K02267+K00413+K02256+K02265+K02261+K00419+K02262+K00416+K02267+K00417+K00411+K02266+K02266
Carotenoid biosynthesis	47	Munro_Bamboo_unigene_BMK_10794;Munro_Bamboo_unigene_BMK_11243;Munro_Bamboo_unigene_BMK_11635;Munro_Bamboo_unigene_BMK_16029;Munro_Bamboo_unigene_BMK_19838;Munro_Bamboo_unigene_BMK_2120;Munro_Bamboo_unigene_BMK_21521;Munro_Bamboo_unigene_BMK_21896;Munro_Bamboo_unigene_BMK_22408;Munro_Bamboo_unigene_BMK_22668;Munro_Bamboo_unigene_BMK_23702;Munro_Bamboo_unigene_BMK_25703;Munro_Bamboo_unigene_BMK_265…	K09843+K00514+K09843+K09843+K02293+K09837+K14606+K09841+K09840+K06444+K06443+K14606+K06443+K09838+K09839+K02294+K09840+K09843+K09840+K09843+K00514+K09838+K09835+K02291+K02291+K06444+K02291+K02291+K09843+K09835+K09835+K09838+K09839+K09840+K06443+K14606+K09840+K06444+K02294+K02294+K09843+K06444+K02291+K02294+K09843+K02291+K02293
Cell cycle	186	Munro_Bamboo_unigene_BMK_10236;Munro_Bamboo_unigene_BMK_10642;Munro_Bamboo_unigene_BMK_11166;Munro_Bamboo_unigene_BMK_11209;Munro_Bamboo_unigene_BMK_1133;Munro_Bamboo_unigene_BMK_1134;Munro_Bamboo_unigene_BMK_11405;Munro_Bamboo_unigene_BMK_11434;Munro_Bamboo_unigene_BMK_11435;Munro_Bamboo_unigene_BMK_11437;Munro_Bamboo_unigene_BMK_1147;Munro_Bamboo_unigene_BMK_11796;Munro_Bamboo_unigene_BMK_11822…	K03349+K04681+K05868+K06067+K06067+K06067+K02202+K02540+K02540+K02540+K06067+K06671+K06627+K06670+K05868+K02604+K03348+K03348+K04728+K04498+K02605+K02365+K03354+K06627+K06628+K13728+K06627+K03094+K02537+K02180+K02180+K04498+K03357+K04498+K04728+K04498+K02214+K06669+K06067+K03351+K02540+K03348+K08866+K06640+K06636+K03347+K02214+K06067+K04498+K02607+K04498+K02606+K02178+K06067+K04728+K03352+K03094+…
Cell cycle - Caulobacter	20	Munro_Bamboo_unigene_BMK_10087;Munro_Bamboo_unigene_BMK_11258;Munro_Bamboo_unigene_BMK_13307;Munro_Bamboo_unigene_BMK_14253;Munro_Bamboo_unigene_BMK_15282;Munro_Bamboo_unigene_BMK_22347;Munro_Bamboo_unigene_BMK_26190;Munro_Bamboo_unigene_BMK_27249;Munro_Bamboo_unigene_BMK_27425;Munro_Bamboo_unigene_BMK_42153;Munro_Bamboo_unigene_BMK_42387;Munro_Bamboo_unigene_BMK_43097;Munro_Bamboo_unigene_BMK_48…	K01338+K03531+K03544+K03544+K01358+K01358+K02563+K01358+K03544+K03544+K03544+K03544+K03531+K01358+K01358+K01358+K01358+K01358+K03544+K03544
Cell cycle - yeast	168	Munro_Bamboo_unigene_BMK_10236;Munro_Bamboo_unigene_BMK_11434;Munro_Bamboo_unigene_BMK_11435;Munro_Bamboo_unigene_BMK_11437;Munro_Bamboo_unigene_BMK_11693;Munro_Bamboo_unigene_BMK_11746;Munro_Bamboo_unigene_BMK_11796;Munro_Bamboo_unigene_BMK_12405;Munro_Bamboo_unigene_BMK_12695;Munro_Bamboo_unigene_BMK_13234;Munro_Bamboo_unigene_BMK_13361;Munro_Bamboo_unigene_BMK_13776;Munro_Bamboo_unigene_BMK_15…	K03349+K02540+K02540+K02540+K04382+K06677+K06671+K02516+K06670+K02604+K03348+K03348+K02830+K02605+K02365+K03354+K06628+K03094+K02537+K02180+K02180+K06685+K03357+K06674+K02214+K06669+K03351+K03456+K02540+K04382+K03348+K08866+K06674+K06636+K03347+K02214+K02516+K02607+K02606+K02178+K03352+K03094+K04382+K02178+K02180+K02178+K03363+K03355+K06678+K03347+K02516+K03456+K03350+K04382+K06685+K02214+K02213+…
Cellular antigens	35	Munro_Bamboo_unigene_BMK_10754;Munro_Bamboo_unigene_BMK_10755;Munro_Bamboo_unigene_BMK_10796;Munro_Bamboo_unigene_BMK_15002;Munro_Bamboo_unigene_BMK_16805;Munro_Bamboo_unigene_BMK_1813;Munro_Bamboo_unigene_BMK_18521;Munro_Bamboo_unigene_BMK_18931;Munro_Bamboo_unigene_BMK_22262;Munro_Bamboo_unigene_BMK_24568;Munro_Bamboo_unigene_BMK_27186;Munro_Bamboo_unigene_BMK_28562;Munro_Bamboo_unigene_BMK_304…	K05658+K05658+K05658+K05658+K00681+K01278+K05658+K05658+K05658+K00681+K00681+K05658+K05658+K05658+K05658+K01510+K00681+K05658+K05658+K00681+K00681+K05658+K05658+K01510+K05658+K05658+K05658+K05658+K05658+K05658+K05658+K05658+K00681+K05658+K05658
Chagas disease (American trypanosomiasis)	39	Munro_Bamboo_unigene_BMK_10992;Munro_Bamboo_unigene_BMK_11693;Munro_Bamboo_unigene_BMK_17186;Munro_Bamboo_unigene_BMK_17420;Munro_Bamboo_unigene_BMK_17541;Munro_Bamboo_unigene_BMK_20871;Munro_Bamboo_unigene_BMK_20917;Munro_Bamboo_unigene_BMK_24620;Munro_Bamboo_unigene_BMK_25793;Munro_Bamboo_unigene_BMK_26665;Munro_Bamboo_unigene_BMK_27108;Munro_Bamboo_unigene_BMK_27565;Munro_Bamboo_unigene_BMK_29…	K04371+K04382+K04371+K01354+K08057+K03456+K04382+K04371+K04371+K04382+K04371+K04371+K03456+K04382+K04371+K04354+K04354+K04354+K03456+K03456+K04382+K08057+K04382+K01354+K08057+K04371+K04371+K04371+K08057+K04382+K08057+K04371+K08057+K04382+K04382+K04733+K04354+K04354+K04371
Chaperones and folding catalysts	304	Munro_Bamboo_unigene_BMK_10115;Munro_Bamboo_unigene_BMK_10308;Munro_Bamboo_unigene_BMK_10315;Munro_Bamboo_unigene_BMK_10352;Munro_Bamboo_unigene_BMK_104;Munro_Bamboo_unigene_BMK_105;Munro_Bamboo_unigene_BMK_10847;Munro_Bamboo_unigene_BMK_1111;Munro_Bamboo_unigene_BMK_11364;Munro_Bamboo_unigene_BMK_11600;Munro_Bamboo_unigene_BMK_11645;Munro_Bamboo_unigene_BMK_11646;Munro_Bamboo_unigene_BMK_11964;M…	K07390+K09584+K09584+K09584+K08054+K08054+K03283+K09522+K09486+K04797+K05864+K05864+K03687+K09571+K09580+K09580+K09580+K09580+K09580+K09549+K01280+K09494+K09510+K09510+K09510+K03283+K12737+K03544+K13993+K03283+K04043+K09529+K03544+K03671+K04077+K09496+K12736+K09561+K03283+K03798+K09489+K09522+K09562+K03671+K03676+K10598+K08057+K09533+K03671+K09533+K09528+K12373+K03686+K09486+K03798+K13289+K09578+…
Chemokine signaling pathway	45	Munro_Bamboo_unigene_BMK_10376;Munro_Bamboo_unigene_BMK_10992;Munro_Bamboo_unigene_BMK_12381;Munro_Bamboo_unigene_BMK_12712;Munro_Bamboo_unigene_BMK_15264;Munro_Bamboo_unigene_BMK_15446;Munro_Bamboo_unigene_BMK_15508;Munro_Bamboo_unigene_BMK_15796;Munro_Bamboo_unigene_BMK_17186;Munro_Bamboo_unigene_BMK_18311;Munro_Bamboo_unigene_BMK_20285;Munro_Bamboo_unigene_BMK_21706;Munro_Bamboo_unigene_BMK_24…	K05747+K04371+K04392+K05747+K05747+K04392+K04392+K04368+K04371+K04392+K04392+K04392+K04371+K04392+K04392+K04371+K04392+K04392+K04392+K04371+K04392+K04371+K04392+K04392+K03083+K04371+K04392+K05747+K04392+K03083+K04392+K03083+K04371+K04371+K04371+K04392+K04536+K04368+K04368+K04371+K05747+K04392+K04392+K04392+K04371
Chloroalkane and chloroalkene degradation	31	Munro_Bamboo_unigene_BMK_11032;Munro_Bamboo_unigene_BMK_11066;Munro_Bamboo_unigene_BMK_11088;Munro_Bamboo_unigene_BMK_12312;Munro_Bamboo_unigene_BMK_12377;Munro_Bamboo_unigene_BMK_13176;Munro_Bamboo_unigene_BMK_14015;Munro_Bamboo_unigene_BMK_17641;Munro_Bamboo_unigene_BMK_1975;Munro_Bamboo_unigene_BMK_25705;Munro_Bamboo_unigene_BMK_27279;Munro_Bamboo_unigene_BMK_27371;Munro_Bamboo_unigene_BMK_285…	K00128+K00001+K00001+K00120+K00128+K00128+K00001+K00128+K00001+K00001+K00128+K00001+K00121+K00001+K00001+K00001+K00001+K00121+K00128+K00001+K00121+K00001+K00001+K00001+K00128+K00128+K00128+K00121+K00128+K00128+K00121
Chlorocyclohexane and chlorobenzene degradation	3	Munro_Bamboo_unigene_BMK_23247;Munro_Bamboo_unigene_BMK_27062;Munro_Bamboo_unigene_BMK_3882;	K01061+K01061+K01061
Chromosome	680	Munro_Bamboo_unigene_BMK_10236;Munro_Bamboo_unigene_BMK_10284;Munro_Bamboo_unigene_BMK_10285;Munro_Bamboo_unigene_BMK_10316;Munro_Bamboo_unigene_BMK_10342;Munro_Bamboo_unigene_BMK_10540;Munro_Bamboo_unigene_BMK_1064;Munro_Bamboo_unigene_BMK_10688;Munro_Bamboo_unigene_BMK_10697;Munro_Bamboo_unigene_BMK_10885;Munro_Bamboo_unigene_BMK_1090;Munro_Bamboo_unigene_BMK_10909;Munro_Bamboo_unigene_BMK_1091…	K03349+K11644+K11644+K11373+K11293+K03125+K10753+K11375+K11644+K08850+K11507+K11368+K11368+K11368+K04371+K11430+K06067+K03531+K06067+K06067+K03164+K06067+K05931+K04382+K11584+K06677+K06671+K11584+K11648+K00558+K11649+K11252+K11252+K11252+K11252+K11252+K02516+K11275+K11275+K10695+K10393+K11437+K06670+K10755+K11649+K09186+K03348+K11647+K03348+K11303+K11251+K11251+K03130+K03130+K11275+K11273+K11251+…
Chronic myeloid leukemia	27	Munro_Bamboo_unigene_BMK_10992;Munro_Bamboo_unigene_BMK_11209;Munro_Bamboo_unigene_BMK_1133;Munro_Bamboo_unigene_BMK_1134;Munro_Bamboo_unigene_BMK_1147;Munro_Bamboo_unigene_BMK_15796;Munro_Bamboo_unigene_BMK_17186;Munro_Bamboo_unigene_BMK_20580;Munro_Bamboo_unigene_BMK_23440;Munro_Bamboo_unigene_BMK_24620;Munro_Bamboo_unigene_BMK_25218;Munro_Bamboo_unigene_BMK_25793;Munro_Bamboo_unigene_BMK_27108…	K04371+K06067+K06067+K06067+K06067+K04368+K04371+K06067+K06067+K04371+K06067+K04371+K04371+K04371+K04371+K06620+K06067+K06067+K06067+K04371+K04371+K04371+K04368+K04368+K04371+K06067+K04371
Circadian rhythm - fly	10	Munro_Bamboo_unigene_BMK_23742;Munro_Bamboo_unigene_BMK_31480;Munro_Bamboo_unigene_BMK_3332;Munro_Bamboo_unigene_BMK_3333;Munro_Bamboo_unigene_BMK_3335;Munro_Bamboo_unigene_BMK_40628;Munro_Bamboo_unigene_BMK_43844;Munro_Bamboo_unigene_BMK_47857;Munro_Bamboo_unigene_BMK_48864;Munro_Bamboo_unigene_BMK_6953;	K02218+K03083+K02218+K02218+K02218+K02218+K02218+K03083+K03083+K02218
Circadian rhythm - mammal	22	Munro_Bamboo_unigene_BMK_16753;Munro_Bamboo_unigene_BMK_23193;Munro_Bamboo_unigene_BMK_26571;Munro_Bamboo_unigene_BMK_28489;Munro_Bamboo_unigene_BMK_3199;Munro_Bamboo_unigene_BMK_3200;Munro_Bamboo_unigene_BMK_3201;Munro_Bamboo_unigene_BMK_3336;Munro_Bamboo_unigene_BMK_35627;Munro_Bamboo_unigene_BMK_35768;Munro_Bamboo_unigene_BMK_35892;Munro_Bamboo_unigene_BMK_38168;Munro_Bamboo_unigene_BMK_48917;…	K03094+K03347+K03094+K03347+K03094+K03094+K03094+K03868+K03347+K03094+K03868+K03094+K03094+K03094+K02295+K03347+K03347+K03347+K03347+K03347+K03347+K03347
Circadian rhythm - plant	49	Munro_Bamboo_unigene_BMK_10230;Munro_Bamboo_unigene_BMK_12168;Munro_Bamboo_unigene_BMK_12169;Munro_Bamboo_unigene_BMK_13457;Munro_Bamboo_unigene_BMK_15135;Munro_Bamboo_unigene_BMK_15973;Munro_Bamboo_unigene_BMK_1599;Munro_Bamboo_unigene_BMK_16567;Munro_Bamboo_unigene_BMK_2090;Munro_Bamboo_unigene_BMK_2196;Munro_Bamboo_unigene_BMK_22034;Munro_Bamboo_unigene_BMK_24224;Munro_Bamboo_unigene_BMK_29208…	K03115+K03097+K03097+K12118+K12130+K12115+K12118+K12116+K03097+K03115+K12129+K03097+K03097+K12116+K12116+K12118+K12132+K03115+K12130+K12130+K12130+K03115+K12130+K12124+K12124+K12116+K12130+K12130+K12132+K12121+K12116+K12116+K12118+K12115+K03115+K12118+K12127+K03097+K12118+K12120+K00660+K12130+K12118+K12130+K12118+K12115+K12120+K00660+K12120
Citrate cycle (TCA cycle)	95	Munro_Bamboo_unigene_BMK_10041;Munro_Bamboo_unigene_BMK_10042;Munro_Bamboo_unigene_BMK_10043;Munro_Bamboo_unigene_BMK_10289;Munro_Bamboo_unigene_BMK_10290;Munro_Bamboo_unigene_BMK_112;Munro_Bamboo_unigene_BMK_11214;Munro_Bamboo_unigene_BMK_11252;Munro_Bamboo_unigene_BMK_11913;Munro_Bamboo_unigene_BMK_12341;Munro_Bamboo_unigene_BMK_13251;Munro_Bamboo_unigene_BMK_13388;Munro_Bamboo_unigene_BMK_1361…	K01679+K01679+K01679+K00162+K00162+K00025+K00627+K00382+K00161+K00026+K00025+K00026+K00026+K00627+K00382+K00026+K00161+K00026+K01681+K00382+K00382+K01679+K00026+K00627+K00382+K01610+K01647+K01679+K00030+K00627+K00026+K00161+K01899+K00031+K00164+K01610+K01647+K00627+K01681+K01681+K00026+K01648+K01648+K00164+K00627+K00162+K01610+K00234+K00234+K01679+K00382+K01647+K00627+K00627+K00235+K00030+K01681+…
Collecting duct acid secretion	52	Munro_Bamboo_unigene_BMK_10869;Munro_Bamboo_unigene_BMK_10871;Munro_Bamboo_unigene_BMK_15608;Munro_Bamboo_unigene_BMK_20993;Munro_Bamboo_unigene_BMK_22303;Munro_Bamboo_unigene_BMK_24835;Munro_Bamboo_unigene_BMK_26028;Munro_Bamboo_unigene_BMK_27614;Munro_Bamboo_unigene_BMK_28188;Munro_Bamboo_unigene_BMK_29473;Munro_Bamboo_unigene_BMK_30057;Munro_Bamboo_unigene_BMK_3006;Munro_Bamboo_unigene_BMK_301…	K02150+K02150+K02147+K02150+K02152+K02155+K02147+K02155+K02154+K02151+K02148+K02154+K02155+K02155+K02155+K02155+K02155+K02155+K02155+K02155+K02155+K02148+K02154+K02150+K02150+K02154+K02145+K02145+K02155+K02150+K02147+K02151+K02154+K02155+K02154+K02152+K02154+K02155+K02149+K02154+K02146+K02154+K02155+K02155+K02147+K02149+K02149+K02155+K02155+K02154+K02153+K02145
Colorectal cancer	56	Munro_Bamboo_unigene_BMK_10550;Munro_Bamboo_unigene_BMK_10992;Munro_Bamboo_unigene_BMK_12381;Munro_Bamboo_unigene_BMK_15446;Munro_Bamboo_unigene_BMK_15508;Munro_Bamboo_unigene_BMK_15796;Munro_Bamboo_unigene_BMK_17186;Munro_Bamboo_unigene_BMK_17851;Munro_Bamboo_unigene_BMK_18311;Munro_Bamboo_unigene_BMK_19784;Munro_Bamboo_unigene_BMK_20285;Munro_Bamboo_unigene_BMK_21706;Munro_Bamboo_unigene_BMK_22…	K08734+K04371+K04392+K04392+K04392+K04368+K04371+K08734+K04392+K08737+K04392+K04392+K08736+K08737+K08735+K04371+K04392+K08735+K04392+K04371+K04392+K04392+K04392+K04371+K04392+K04371+K04392+K04392+K08737+K03083+K04371+K04392+K08736+K08737+K08738+K04392+K08736+K03083+K04392+K03083+K04371+K04371+K08737+K04371+K08738+K08737+K04392+K04368+K04368+K04371+K08738+K04392+K04392+K04392+K08735+K04371
Cyanoamino acid metabolism	49	Munro_Bamboo_unigene_BMK_11371;Munro_Bamboo_unigene_BMK_13600;Munro_Bamboo_unigene_BMK_16805;Munro_Bamboo_unigene_BMK_169;Munro_Bamboo_unigene_BMK_17794;Munro_Bamboo_unigene_BMK_22531;Munro_Bamboo_unigene_BMK_22873;Munro_Bamboo_unigene_BMK_23329;Munro_Bamboo_unigene_BMK_24568;Munro_Bamboo_unigene_BMK_26533;Munro_Bamboo_unigene_BMK_27186;Munro_Bamboo_unigene_BMK_29022;Munro_Bamboo_unigene_BMK_3214…	K05350+K01188+K00681+K13034+K08248+K05350+K01188+K01188+K00681+K01501+K00681+K00600+K01501+K01188+K13029+K01188+K13035+K00681+K05350+K00681+K01188+K01188+K01188+K13027+K00600+K01501+K00681+K01188+K05350+K00600+K05350+K00600+K13034+K13035+K08249+K13035+K01188+K05350+K00600+K00600+K08249+K01501+K13027+K05350+K00600+K01188+K00681+K01188+K05350
Cysteine and methionine metabolism	133	Munro_Bamboo_unigene_BMK_10169;Munro_Bamboo_unigene_BMK_10804;Munro_Bamboo_unigene_BMK_10820;Munro_Bamboo_unigene_BMK_11211;Munro_Bamboo_unigene_BMK_11376;Munro_Bamboo_unigene_BMK_11413;Munro_Bamboo_unigene_BMK_11414;Munro_Bamboo_unigene_BMK_11415;Munro_Bamboo_unigene_BMK_11910;Munro_Bamboo_unigene_BMK_12350;Munro_Bamboo_unigene_BMK_13028;Munro_Bamboo_unigene_BMK_15515;Munro_Bamboo_unigene_BMK_16…	K14455+K01738+K00815+K08963+K00133+K05933+K05933+K05933+K00558+K00797+K01762+K01762+K01011+K13034+K01611+K01738+K00640+K01611+K08963+K01244+K00558+K00640+K00558+K00813+K01738+K00640+K01738+K00815+K09880+K01738+K01251+K00928+K01760+K01738+K00549+K05933+K01761+K00789+K00789+K00789+K00789+K00789+K00789+K00789+K01738+K05933+K00558+K01738+K01739+K01251+K00928+K09880+K01738+K01011+K00558+K00797+K01738+…
Cytochrome P450	54	Munro_Bamboo_unigene_BMK_10503;Munro_Bamboo_unigene_BMK_10794;Munro_Bamboo_unigene_BMK_11635;Munro_Bamboo_unigene_BMK_12317;Munro_Bamboo_unigene_BMK_16029;Munro_Bamboo_unigene_BMK_16955;Munro_Bamboo_unigene_BMK_18949;Munro_Bamboo_unigene_BMK_19674;Munro_Bamboo_unigene_BMK_19936;Munro_Bamboo_unigene_BMK_20142;Munro_Bamboo_unigene_BMK_25128;Munro_Bamboo_unigene_BMK_27560;Munro_Bamboo_unigene_BMK_27…	K01723+K09843+K09843+K05917+K09843+K05280+K04122+K09588+K05917+K09755+K00487+K04123+K09843+K04123+K09754+K13223+K09843+K09754+K12639+K05917+K05917+K13029+K09587+K13083+K00487+K01723+K00487+K09588+K13027+K09843+K04123+K09755+K12639+K05280+K05280+K12639+K09755+K04123+K04122+K00487+K00487+K09588+K09754+K00487+K09843+K09754+K13027+K09755+K09588+K00487+K09843+K00487+K10528+K13083
Cytoskeleton proteins	111	Munro_Bamboo_unigene_BMK_10376;Munro_Bamboo_unigene_BMK_11018;Munro_Bamboo_unigene_BMK_11103;Munro_Bamboo_unigene_BMK_11258;Munro_Bamboo_unigene_BMK_11795;Munro_Bamboo_unigene_BMK_11877;Munro_Bamboo_unigene_BMK_11878;Munro_Bamboo_unigene_BMK_12485;Munro_Bamboo_unigene_BMK_12486;Munro_Bamboo_unigene_BMK_12635;Munro_Bamboo_unigene_BMK_12712;Munro_Bamboo_unigene_BMK_13792;Munro_Bamboo_unigene_BMK_15…	K05747+K10405+K05755+K03531+K05759+K10418+K10418+K05758+K05758+K10393+K05747+K05765+K05747+K10403+K10403+K10403+K10395+K10393+K05758+K05758+K05765+K05757+K10352+K10393+K10393+K10393+K10436+K07375+K10405+K10405+K07605+K07374+K10398+K10355+K07375+K10398+K07374+K07375+K10393+K10405+K10436+K07375+K07375+K07375+K07375+K07375+K07374+K03609+K07374+K07605+K05747+K07375+K07375+K07375+K05759+K05765+K07375+…
Cytosolic DNA-sensing pathway	38	Munro_Bamboo_unigene_BMK_13815;Munro_Bamboo_unigene_BMK_1445;Munro_Bamboo_unigene_BMK_16024;Munro_Bamboo_unigene_BMK_16200;Munro_Bamboo_unigene_BMK_1688;Munro_Bamboo_unigene_BMK_20174;Munro_Bamboo_unigene_BMK_2132;Munro_Bamboo_unigene_BMK_23394;Munro_Bamboo_unigene_BMK_23621;Munro_Bamboo_unigene_BMK_26717;Munro_Bamboo_unigene_BMK_28887;Munro_Bamboo_unigene_BMK_29087;Munro_Bamboo_unigene_BMK_2971;…	K03018+K03022+K03007+K03016+K03021+K03016+K03026+K03020+K03026+K03024+K03027+K03018+K03009+K03009+K03014+K03016+K03013+K03020+K03024+K03025+K03027+K03018+K03018+K03013+K03025+K03019+K03016+K14721+K03022+K03021+K03009+K03022+K03013+K03014+K03018+K14721+K03007+K03023
D-Glutamine and D-glutamate metabolism	3	Munro_Bamboo_unigene_BMK_11240;Munro_Bamboo_unigene_BMK_21166;Munro_Bamboo_unigene_BMK_37358;	K00261+K00261+K00261
DNA repair and recombination proteins	436	Munro_Bamboo_unigene_BMK_10024;Munro_Bamboo_unigene_BMK_10096;Munro_Bamboo_unigene_BMK_10097;Munro_Bamboo_unigene_BMK_10143;Munro_Bamboo_unigene_BMK_10144;Munro_Bamboo_unigene_BMK_1027;Munro_Bamboo_unigene_BMK_10272;Munro_Bamboo_unigene_BMK_1028;Munro_Bamboo_unigene_BMK_10419;Munro_Bamboo_unigene_BMK_10518;Munro_Bamboo_unigene_BMK_10550;Munro_Bamboo_unigene_BMK_10776;Munro_Bamboo_unigene_BMK_1081…	K10803+K10839+K10839+K10754+K10754+K04482+K03006+K04482+K10865+K10773+K08734+K10739+K03017+K03143+K10609+K10609+K02202+K02325+K03144+K10580+K10580+K10844+K10843+K03654+K10858+K10755+K10901+K10807+K10609+K04728+K07466+K10704+K10747+K10846+K03143+K02350+K10878+K01246+K10895+K10845+K10844+K10895+K10839+K03654+K03006+K02830+K10872+K07466+K03007+K03016+K08741+K03553+K10884+K10872+K10841+K03511+K10610+…
DNA replication	86	Munro_Bamboo_unigene_BMK_10143;Munro_Bamboo_unigene_BMK_10144;Munro_Bamboo_unigene_BMK_10776;Munro_Bamboo_unigene_BMK_11434;Munro_Bamboo_unigene_BMK_11435;Munro_Bamboo_unigene_BMK_11437;Munro_Bamboo_unigene_BMK_12081;Munro_Bamboo_unigene_BMK_12192;Munro_Bamboo_unigene_BMK_12838;Munro_Bamboo_unigene_BMK_13959;Munro_Bamboo_unigene_BMK_14282;Munro_Bamboo_unigene_BMK_1434;Munro_Bamboo_unigene_BMK_154…	K10754+K10754+K10739+K02540+K02540+K02540+K02325+K02320+K10755+K07466+K10747+K02685+K02684+K07466+K02327+K10739+K02321+K02540+K02324+K02335+K02321+K07466+K10742+K10739+K10754+K02320+K02324+K03504+K07466+K02324+K10739+K02320+K10755+K02327+K07466+K02542+K10756+K07466+K07466+K02328+K02335+K10745+K10747+K10745+K02210+K02328+K02325+K07466+K07466+K02684+K10739+K07466+K03111+K07466+K10755+K02321+K02320+…
DNA replication proteins	242	Munro_Bamboo_unigene_BMK_10143;Munro_Bamboo_unigene_BMK_10144;Munro_Bamboo_unigene_BMK_10419;Munro_Bamboo_unigene_BMK_10776;Munro_Bamboo_unigene_BMK_11166;Munro_Bamboo_unigene_BMK_11434;Munro_Bamboo_unigene_BMK_11435;Munro_Bamboo_unigene_BMK_11437;Munro_Bamboo_unigene_BMK_11453;Munro_Bamboo_unigene_BMK_11524;Munro_Bamboo_unigene_BMK_11597;Munro_Bamboo_unigene_BMK_11598;Munro_Bamboo_unigene_BMK_11…	K10754+K10754+K10865+K10739+K05868+K02540+K02540+K02540+K03164+K03163+K11131+K11131+K11131+K06627+K00558+K02325+K11130+K11130+K02320+K11097+K10755+K05868+K02604+K10901+K11086+K11136+K04728+K07466+K10747+K02685+K11087+K03163+K02684+K07466+K02605+K11131+K11099+K06627+K06628+K10735+K06627+K11131+K11099+K03164+K10798+K02327+K00558+K10739+K04728+K02214+K02321+K10866+K02540+K00558+K02324+K02470+K02335+…
Dilated cardiomyopathy (DCM)	1	Munro_Bamboo_unigene_BMK_66793;	K05692
Diterpenoid biosynthesis	11	Munro_Bamboo_unigene_BMK_16457;Munro_Bamboo_unigene_BMK_18949;Munro_Bamboo_unigene_BMK_21904;Munro_Bamboo_unigene_BMK_27560;Munro_Bamboo_unigene_BMK_28358;Munro_Bamboo_unigene_BMK_39542;Munro_Bamboo_unigene_BMK_42394;Munro_Bamboo_unigene_BMK_47323;Munro_Bamboo_unigene_BMK_47858;Munro_Bamboo_unigene_BMK_52072;Munro_Bamboo_unigene_BMK_56166;	K04120+K04122+K04120+K04123+K04123+K04125+K04123+K04123+K04121+K04122+K04120
Dorso-ventral axis formation	15	Munro_Bamboo_unigene_BMK_10992;Munro_Bamboo_unigene_BMK_15796;Munro_Bamboo_unigene_BMK_17186;Munro_Bamboo_unigene_BMK_24620;Munro_Bamboo_unigene_BMK_25793;Munro_Bamboo_unigene_BMK_27108;Munro_Bamboo_unigene_BMK_27565;Munro_Bamboo_unigene_BMK_31491;Munro_Bamboo_unigene_BMK_5118;Munro_Bamboo_unigene_BMK_5119;Munro_Bamboo_unigene_BMK_51698;Munro_Bamboo_unigene_BMK_5697;Munro_Bamboo_unigene_BMK_5698;…	K04371+K04368+K04371+K04371+K04371+K04371+K04371+K04371+K04371+K04371+K04371+K04368+K04368+K04371+K04371
Drug metabolism - cytochrome P450	28	Munro_Bamboo_unigene_BMK_10065;Munro_Bamboo_unigene_BMK_10066;Munro_Bamboo_unigene_BMK_11066;Munro_Bamboo_unigene_BMK_11088;Munro_Bamboo_unigene_BMK_12218;Munro_Bamboo_unigene_BMK_14015;Munro_Bamboo_unigene_BMK_18958;Munro_Bamboo_unigene_BMK_1975;Munro_Bamboo_unigene_BMK_25705;Munro_Bamboo_unigene_BMK_27371;Munro_Bamboo_unigene_BMK_2859;Munro_Bamboo_unigene_BMK_33039;Munro_Bamboo_unigene_BMK_3365…	K00799+K00799+K00001+K00001+K00799+K00001+K00799+K00001+K00001+K00001+K00121+K00799+K00001+K00001+K00001+K00001+K00121+K00001+K00799+K00121+K00799+K00001+K00001+K00001+K00799+K00121+K00799+K00121
Drug metabolism - other enzymes	46	Munro_Bamboo_unigene_BMK_1045;Munro_Bamboo_unigene_BMK_14582;Munro_Bamboo_unigene_BMK_15036;Munro_Bamboo_unigene_BMK_16670;Munro_Bamboo_unigene_BMK_18530;Munro_Bamboo_unigene_BMK_18666;Munro_Bamboo_unigene_BMK_18824;Munro_Bamboo_unigene_BMK_20411;Munro_Bamboo_unigene_BMK_24192;Munro_Bamboo_unigene_BMK_25469;Munro_Bamboo_unigene_BMK_25504;Munro_Bamboo_unigene_BMK_2574;Munro_Bamboo_unigene_BMK_2638…	K01431+K01489+K00088+K00857+K13421+K00106+K13421+K13421+K13421+K00088+K13421+K00760+K00857+K00207+K01431+K00106+K00760+K01951+K01951+K00876+K00876+K01489+K01519+K00876+K00857+K13421+K00106+K00876+K00088+K00876+K01464+K01464+K01464+K01489+K13421+K00106+K00088+K00876+K00106+K00088+K00088+K13421+K01519+K13421+K00876+K00876
Endocytosis	132	Munro_Bamboo_unigene_BMK_10514;Munro_Bamboo_unigene_BMK_10847;Munro_Bamboo_unigene_BMK_11063;Munro_Bamboo_unigene_BMK_11430;Munro_Bamboo_unigene_BMK_12025;Munro_Bamboo_unigene_BMK_12315;Munro_Bamboo_unigene_BMK_12669;Munro_Bamboo_unigene_BMK_13;Munro_Bamboo_unigene_BMK_13534;Munro_Bamboo_unigene_BMK_1370;Munro_Bamboo_unigene_BMK_14847;Munro_Bamboo_unigene_BMK_15555;Munro_Bamboo_unigene_BMK_16287;…	K12489+K03283+K11866+K12189+K12200+K03283+K12492+K11824+K03283+K07887+K00889+K03283+K12200+K11866+K12199+K00889+K01115+K01115+K00889+K12183+K03283+K11866+K03283+K12184+K03283+K01115+K00889+K00889+K12197+K12183+K12194+K03283+K07897+K00889+K03283+K03283+K03283+K03283+K01115+K03283+K00889+K11826+K11826+K00889+K07897+K12479+K03283+K03283+K03283+K03283+K00889+K07887+K12190+K03283+K01528+K07897+K12479+…
Endometrial cancer	24	Munro_Bamboo_unigene_BMK_10550;Munro_Bamboo_unigene_BMK_10992;Munro_Bamboo_unigene_BMK_15796;Munro_Bamboo_unigene_BMK_17186;Munro_Bamboo_unigene_BMK_17851;Munro_Bamboo_unigene_BMK_24620;Munro_Bamboo_unigene_BMK_25793;Munro_Bamboo_unigene_BMK_25873;Munro_Bamboo_unigene_BMK_27108;Munro_Bamboo_unigene_BMK_27565;Munro_Bamboo_unigene_BMK_31480;Munro_Bamboo_unigene_BMK_31491;Munro_Bamboo_unigene_BMK_35…	K08734+K04371+K04368+K04371+K08734+K04371+K04371+K06276+K04371+K04371+K03083+K04371+K06276+K03083+K03083+K04371+K04371+K04371+K04368+K04368+K04371+K01110+K06276+K04371
Epithelial cell signaling in Helicobacter pylori infection	75	Munro_Bamboo_unigene_BMK_10869;Munro_Bamboo_unigene_BMK_10871;Munro_Bamboo_unigene_BMK_12381;Munro_Bamboo_unigene_BMK_15446;Munro_Bamboo_unigene_BMK_15508;Munro_Bamboo_unigene_BMK_15608;Munro_Bamboo_unigene_BMK_18311;Munro_Bamboo_unigene_BMK_20285;Munro_Bamboo_unigene_BMK_20993;Munro_Bamboo_unigene_BMK_21706;Munro_Bamboo_unigene_BMK_22303;Munro_Bamboo_unigene_BMK_24621;Munro_Bamboo_unigene_BMK_24…	K02150+K02150+K04392+K04392+K04392+K02147+K04392+K04392+K02150+K04392+K02152+K04392+K02155+K04392+K02147+K04392+K04392+K04392+K04392+K02155+K04392+K02154+K02151+K04392+K02148+K02154+K02155+K02155+K02155+K02155+K02155+K02155+K02155+K02155+K02155+K02148+K02154+K02150+K02150+K02154+K02145+K02145+K02144+K04392+K02155+K02150+K02147+K02151+K04392+K02154+K02155+K02154+K02152+K02154+K04392+K02155+K02149+…
ErbB signaling pathway	28	Munro_Bamboo_unigene_BMK_10992;Munro_Bamboo_unigene_BMK_13872;Munro_Bamboo_unigene_BMK_15796;Munro_Bamboo_unigene_BMK_17186;Munro_Bamboo_unigene_BMK_24620;Munro_Bamboo_unigene_BMK_25793;Munro_Bamboo_unigene_BMK_27108;Munro_Bamboo_unigene_BMK_27565;Munro_Bamboo_unigene_BMK_31480;Munro_Bamboo_unigene_BMK_31491;Munro_Bamboo_unigene_BMK_43994;Munro_Bamboo_unigene_BMK_46617;Munro_Bamboo_unigene_BMK_47…	K04371+K07203+K04368+K04371+K04371+K04371+K04371+K04371+K03083+K04371+K07203+K07203+K03083+K03083+K04371+K04371+K04371+K07203+K07203+K07203+K07203+K04368+K04368+K04371+K07203+K07203+K07203+K04371
Ether lipid metabolism	50	Munro_Bamboo_unigene_BMK_16859;Munro_Bamboo_unigene_BMK_17795;Munro_Bamboo_unigene_BMK_18422;Munro_Bamboo_unigene_BMK_21953;Munro_Bamboo_unigene_BMK_22165;Munro_Bamboo_unigene_BMK_22655;Munro_Bamboo_unigene_BMK_25537;Munro_Bamboo_unigene_BMK_25812;Munro_Bamboo_unigene_BMK_2731;Munro_Bamboo_unigene_BMK_28111;Munro_Bamboo_unigene_BMK_28156;Munro_Bamboo_unigene_BMK_29419;Munro_Bamboo_unigene_BMK_295…	K01114+K01115+K01115+K01047+K01115+K01114+K14674+K01047+K13510+K01115+K13510+K01047+K14674+K01114+K01114+K01114+K14674+K01114+K01115+K01115+K01115+K01115+K01114+K01114+K01114+K01115+K01115+K01114+K14674+K14674+K14674+K01115+K01115+K01047+K01114+K01047+K13510+K14674+K01047+K01115+K01114+K01115+K01115+K01115+K14674+K13510+K13510+K01114+K00993+K00993
Fat digestion and absorption	14	Munro_Bamboo_unigene_BMK_10169;Munro_Bamboo_unigene_BMK_19704;Munro_Bamboo_unigene_BMK_2136;Munro_Bamboo_unigene_BMK_21953;Munro_Bamboo_unigene_BMK_25812;Munro_Bamboo_unigene_BMK_29419;Munro_Bamboo_unigene_BMK_31328;Munro_Bamboo_unigene_BMK_51968;Munro_Bamboo_unigene_BMK_58199;Munro_Bamboo_unigene_BMK_59842;Munro_Bamboo_unigene_BMK_6056;Munro_Bamboo_unigene_BMK_6057;Munro_Bamboo_unigene_BMK_62529…	K14455+K14457+K14457+K01047+K01047+K01047+K11155+K11155+K01047+K01047+K11155+K11155+K14457+K01047
Fatty acid biosynthesis	71	Munro_Bamboo_unigene_BMK_11396;Munro_Bamboo_unigene_BMK_11397;Munro_Bamboo_unigene_BMK_11882;Munro_Bamboo_unigene_BMK_11883;Munro_Bamboo_unigene_BMK_12603;Munro_Bamboo_unigene_BMK_12768;Munro_Bamboo_unigene_BMK_1478;Munro_Bamboo_unigene_BMK_1479;Munro_Bamboo_unigene_BMK_15165;Munro_Bamboo_unigene_BMK_15353;Munro_Bamboo_unigene_BMK_16791;Munro_Bamboo_unigene_BMK_17560;Munro_Bamboo_unigene_BMK_1804…	K10781+K10781+K10781+K10781+K10782+K00208+K09458+K09458+K09458+K11262+K11262+K11262+K09458+K11262+K02372+K03921+K10781+K00059+K10781+K11262+K10781+K00059+K00059+K09458+K00059+K03921+K03921+K03921+K10781+K00208+K11262+K09458+K03921+K09458+K00645+K10781+K09458+K00059+K03921+K11262+K11262+K00208+K03921+K03921+K11262+K03921+K03921+K03921+K09458+K03921+K11262+K00059+K11262+K03921+K00059+K10781+K00648+…
Fatty acid elongation in mitochondria	5	Munro_Bamboo_unigene_BMK_1156;Munro_Bamboo_unigene_BMK_42125;Munro_Bamboo_unigene_BMK_43956;Munro_Bamboo_unigene_BMK_46390;Munro_Bamboo_unigene_BMK_66604;	K07512+K01074+K01074+K01074+K01074
Fatty acid metabolism	78	Munro_Bamboo_unigene_BMK_11032;Munro_Bamboo_unigene_BMK_11066;Munro_Bamboo_unigene_BMK_11088;Munro_Bamboo_unigene_BMK_1153;Munro_Bamboo_unigene_BMK_12096;Munro_Bamboo_unigene_BMK_12377;Munro_Bamboo_unigene_BMK_13176;Munro_Bamboo_unigene_BMK_14015;Munro_Bamboo_unigene_BMK_14130;Munro_Bamboo_unigene_BMK_16122;Munro_Bamboo_unigene_BMK_17361;Munro_Bamboo_unigene_BMK_17641;Munro_Bamboo_unigene_BMK_184…	K00128+K00001+K00001+K00626+K14085+K00128+K00128+K00001+K00232+K00232+K01897+K00128+K00249+K00232+K00001+K14085+K00249+K00249+K01897+K00001+K01897+K01692+K01897+K00128+K00001+K00121+K00232+K00232+K00001+K00232+K00001+K00001+K00001+K00121+K00128+K01897+K01897+K01897+K00626+K00001+K01897+K00232+K01897+K07513+K00626+K00232+K01897+K00121+K07513+K00001+K00001+K00249+K00232+K00001+K01897+K00249+K00128+…
Fc epsilon RI signaling pathway	42	Munro_Bamboo_unigene_BMK_10992;Munro_Bamboo_unigene_BMK_12381;Munro_Bamboo_unigene_BMK_15446;Munro_Bamboo_unigene_BMK_15508;Munro_Bamboo_unigene_BMK_15796;Munro_Bamboo_unigene_BMK_17186;Munro_Bamboo_unigene_BMK_18311;Munro_Bamboo_unigene_BMK_20285;Munro_Bamboo_unigene_BMK_21706;Munro_Bamboo_unigene_BMK_21953;Munro_Bamboo_unigene_BMK_24620;Munro_Bamboo_unigene_BMK_24621;Munro_Bamboo_unigene_BMK_24…	K04371+K04392+K04392+K04392+K04368+K04371+K04392+K04392+K04392+K01047+K04371+K04392+K04392+K04371+K01047+K04392+K04392+K04392+K04371+K04392+K04371+K04392+K01047+K04392+K04371+K04392+K04392+K04392+K04371+K04371+K04371+K04392+K04368+K04368+K01047+K04371+K01047+K04392+K01047+K04392+K04392+K04371
Fc gamma R-mediated phagocytosis	101	Munro_Bamboo_unigene_BMK_10376;Munro_Bamboo_unigene_BMK_10992;Munro_Bamboo_unigene_BMK_11103;Munro_Bamboo_unigene_BMK_12381;Munro_Bamboo_unigene_BMK_12485;Munro_Bamboo_unigene_BMK_12486;Munro_Bamboo_unigene_BMK_12712;Munro_Bamboo_unigene_BMK_13792;Munro_Bamboo_unigene_BMK_14847;Munro_Bamboo_unigene_BMK_15264;Munro_Bamboo_unigene_BMK_15446;Munro_Bamboo_unigene_BMK_15508;Munro_Bamboo_unigene_BMK_15…	K05747+K04371+K05755+K04392+K05758+K05758+K05747+K05765+K00889+K05747+K04392+K04392+K04368+K04371+K00889+K01115+K04392+K01115+K05758+K00889+K04392+K05758+K04392+K01115+K00889+K04718+K00889+K05765+K04371+K04392+K04392+K04371+K05757+K00889+K04392+K04392+K04392+K04371+K04392+K04371+K04392+K01115+K00889+K00889+K04392+K04371+K00889+K06274+K01528+K01115+K04392+K01115+K05747+K01115+K00889+K01115+K05765+…
Flavone and flavonol biosynthesis	11	Munro_Bamboo_unigene_BMK_16955;Munro_Bamboo_unigene_BMK_34791;Munro_Bamboo_unigene_BMK_34993;Munro_Bamboo_unigene_BMK_35830;Munro_Bamboo_unigene_BMK_4079;Munro_Bamboo_unigene_BMK_4080;Munro_Bamboo_unigene_BMK_44846;Munro_Bamboo_unigene_BMK_46059;Munro_Bamboo_unigene_BMK_59387;Munro_Bamboo_unigene_BMK_64130;Munro_Bamboo_unigene_BMK_965;	K05280+K13083+K00724+K00724+K05279+K05279+K05280+K05280+K05279+K05279+K13083
Flavonoid biosynthesis	48	Munro_Bamboo_unigene_BMK_10903;Munro_Bamboo_unigene_BMK_10904;Munro_Bamboo_unigene_BMK_1168;Munro_Bamboo_unigene_BMK_16955;Munro_Bamboo_unigene_BMK_21883;Munro_Bamboo_unigene_BMK_25128;Munro_Bamboo_unigene_BMK_26036;Munro_Bamboo_unigene_BMK_26906;Munro_Bamboo_unigene_BMK_27763;Munro_Bamboo_unigene_BMK_27931;Munro_Bamboo_unigene_BMK_28256;Munro_Bamboo_unigene_BMK_2903;Munro_Bamboo_unigene_BMK_2919…	K13082+K13082+K05277+K05280+K08695+K00487+K05277+K13065+K13065+K08695+K08695+K09754+K00588+K09754+K13065+K13083+K00091+K00487+K00475+K05278+K00487+K05280+K05280+K05277+K00487+K13065+K13065+K08695+K00487+K00660+K09754+K00487+K09754+K13065+K00091+K13065+K01859+K05278+K00487+K00475+K08695+K08695+K08695+K00487+K05277+K05277+K00660+K13083
Fluorobenzoate degradation	3	Munro_Bamboo_unigene_BMK_23247;Munro_Bamboo_unigene_BMK_27062;Munro_Bamboo_unigene_BMK_3882;	K01061+K01061+K01061
Focal adhesion	52	Munro_Bamboo_unigene_BMK_10992;Munro_Bamboo_unigene_BMK_12381;Munro_Bamboo_unigene_BMK_15446;Munro_Bamboo_unigene_BMK_15508;Munro_Bamboo_unigene_BMK_15796;Munro_Bamboo_unigene_BMK_17186;Munro_Bamboo_unigene_BMK_17960;Munro_Bamboo_unigene_BMK_18311;Munro_Bamboo_unigene_BMK_20285;Munro_Bamboo_unigene_BMK_21706;Munro_Bamboo_unigene_BMK_24620;Munro_Bamboo_unigene_BMK_24621;Munro_Bamboo_unigene_BMK_24…	K04371+K04392+K04392+K04392+K04368+K04371+K06273+K04392+K04392+K04392+K04371+K04392+K04392+K04371+K06276+K04392+K04392+K04392+K04371+K04392+K04371+K04392+K06269+K04392+K03083+K04371+K06274+K06269+K06276+K04392+K06269+K06269+K06269+K04392+K03083+K04392+K03083+K06269+K04371+K04371+K04371+K04392+K04368+K04368+K04371+K04392+K04392+K04392+K05692+K01110+K06276+K04371
Folate biosynthesis	33	Munro_Bamboo_unigene_BMK_13204;Munro_Bamboo_unigene_BMK_16135;Munro_Bamboo_unigene_BMK_20331;Munro_Bamboo_unigene_BMK_23439;Munro_Bamboo_unigene_BMK_236;Munro_Bamboo_unigene_BMK_237;Munro_Bamboo_unigene_BMK_238;Munro_Bamboo_unigene_BMK_239;Munro_Bamboo_unigene_BMK_240;Munro_Bamboo_unigene_BMK_24811;Munro_Bamboo_unigene_BMK_27951;Munro_Bamboo_unigene_BMK_2858;Munro_Bamboo_unigene_BMK_30017;Munro_B…	K13941+K13998+K01113+K01113+K13950+K13950+K13950+K13950+K13950+K01930+K13998+K01930+K13941+K13950+K01495+K01495+K00796+K13950+K01495+K13950+K01930+K01495+K01633+K01113+K01113+K01930+K01633+K01633+K01307+K01633+K01930+K13941+K13998
Fructose and mannose metabolism	112	Munro_Bamboo_unigene_BMK_10107;Munro_Bamboo_unigene_BMK_1205;Munro_Bamboo_unigene_BMK_12076;Munro_Bamboo_unigene_BMK_12412;Munro_Bamboo_unigene_BMK_12515;Munro_Bamboo_unigene_BMK_12516;Munro_Bamboo_unigene_BMK_12517;Munro_Bamboo_unigene_BMK_1346;Munro_Bamboo_unigene_BMK_15610;Munro_Bamboo_unigene_BMK_15883;Munro_Bamboo_unigene_BMK_16272;Munro_Bamboo_unigene_BMK_18520;Munro_Bamboo_unigene_BMK_1880…	K00895+K03841+K00844+K00895+K00895+K00895+K00895+K05305+K01623+K00895+K00008+K00895+K01623+K03841+K00850+K05305+K03841+K00850+K00971+K00971+K01840+K00850+K01103+K00850+K01623+K00847+K00850+K00895+K01623+K01623+K00895+K00850+K00844+K00847+K01103+K00844+K00850+K01623+K01803+K00844+K01805+K00844+K00847+K00850+K00850+K05305+K00895+K00844+K01623+K01623+K01623+K00971+K00847+K03841+K01809+K00844+K00847+…
G protein-coupled receptors	8	Munro_Bamboo_unigene_BMK_2317;Munro_Bamboo_unigene_BMK_26543;Munro_Bamboo_unigene_BMK_40161;Munro_Bamboo_unigene_BMK_5377;Munro_Bamboo_unigene_BMK_54266;Munro_Bamboo_unigene_BMK_57680;Munro_Bamboo_unigene_BMK_59703;Munro_Bamboo_unigene_BMK_62433;	K08472+K08472+K08472+K08472+K08472+K08472+K08472+K08472
GTP-binding proteins	89	Munro_Bamboo_unigene_BMK_10117;Munro_Bamboo_unigene_BMK_10118;Munro_Bamboo_unigene_BMK_10119;Munro_Bamboo_unigene_BMK_10977;Munro_Bamboo_unigene_BMK_11743;Munro_Bamboo_unigene_BMK_12170;Munro_Bamboo_unigene_BMK_12172;Munro_Bamboo_unigene_BMK_12173;Munro_Bamboo_unigene_BMK_12174;Munro_Bamboo_unigene_BMK_12381;Munro_Bamboo_unigene_BMK_1370;Munro_Bamboo_unigene_BMK_14938;Munro_Bamboo_unigene_BMK_154…	K07977+K07977+K07977+K07901+K04640+K07953+K07953+K07953+K07953+K04392+K07887+K07890+K04392+K04392+K07976+K04392+K07901+K07976+K04392+K04392+K07910+K07910+K07874+K07936+K04392+K07890+K07976+K04392+K07897+K04392+K04392+K04392+K04640+K04392+K04392+K07936+K07901+K07901+K07936+K04392+K04640+K07897+K07901+K07976+K07976+K07953+K07887+K07952+K07976+K07976+K07942+K07897+K07936+K07910+K07901+K04392+K07910+…
Galactose metabolism	91	Munro_Bamboo_unigene_BMK_10484;Munro_Bamboo_unigene_BMK_10999;Munro_Bamboo_unigene_BMK_12076;Munro_Bamboo_unigene_BMK_12446;Munro_Bamboo_unigene_BMK_16401;Munro_Bamboo_unigene_BMK_16613;Munro_Bamboo_unigene_BMK_16877;Munro_Bamboo_unigene_BMK_20477;Munro_Bamboo_unigene_BMK_20588;Munro_Bamboo_unigene_BMK_2159;Munro_Bamboo_unigene_BMK_21870;Munro_Bamboo_unigene_BMK_23536;Munro_Bamboo_unigene_BMK_237…	K00963+K01193+K00844+K00963+K01784+K01193+K07407+K00963+K00850+K00850+K07407+K00850+K01187+K12309+K00850+K06611+K00850+K00849+K01784+K07407+K01193+K00850+K00844+K01187+K07407+K01193+K00844+K01193+K00850+K01187+K01187+K01835+K00963+K07407+K01187+K01193+K12309+K00844+K00844+K00850+K00850+K00844+K01193+K01193+K00844+K01193+K00850+K01784+K07407+K00850+K00844+K00850+K00850+K00963+K00850+K01193+K01193+…
Gap junction	39	Munro_Bamboo_unigene_BMK_10992;Munro_Bamboo_unigene_BMK_15796;Munro_Bamboo_unigene_BMK_17186;Munro_Bamboo_unigene_BMK_24620;Munro_Bamboo_unigene_BMK_25793;Munro_Bamboo_unigene_BMK_27108;Munro_Bamboo_unigene_BMK_27565;Munro_Bamboo_unigene_BMK_27675;Munro_Bamboo_unigene_BMK_28759;Munro_Bamboo_unigene_BMK_30800;Munro_Bamboo_unigene_BMK_31491;Munro_Bamboo_unigene_BMK_3228;Munro_Bamboo_unigene_BMK_337…	K04371+K04368+K04371+K04371+K04371+K04371+K04371+K07375+K07374+K07375+K04371+K07374+K07375+K07375+K07375+K07375+K07375+K07375+K07374+K07374+K07375+K07375+K07375+K07375+K07375+K07375+K04371+K04371+K07375+K04371+K07375+K07375+K04368+K04368+K07375+K04371+K07374+K02087+K04371
Gastric acid secretion	5	Munro_Bamboo_unigene_BMK_18672;Munro_Bamboo_unigene_BMK_3671;Munro_Bamboo_unigene_BMK_3673;Munro_Bamboo_unigene_BMK_50043;Munro_Bamboo_unigene_BMK_58481;	K02183+K02183+K02183+K02183+K02183
Geraniol degradation	9	Munro_Bamboo_unigene_BMK_24873;Munro_Bamboo_unigene_BMK_26730;Munro_Bamboo_unigene_BMK_39255;Munro_Bamboo_unigene_BMK_42817;Munro_Bamboo_unigene_BMK_48629;Munro_Bamboo_unigene_BMK_57408;Munro_Bamboo_unigene_BMK_59897;Munro_Bamboo_unigene_BMK_9266;Munro_Bamboo_unigene_BMK_9817;	K01640+K01692+K01640+K01640+K01640+K01640+K01692+K01692+K01692
Glioma	32	Munro_Bamboo_unigene_BMK_10992;Munro_Bamboo_unigene_BMK_13872;Munro_Bamboo_unigene_BMK_15796;Munro_Bamboo_unigene_BMK_17186;Munro_Bamboo_unigene_BMK_18672;Munro_Bamboo_unigene_BMK_24620;Munro_Bamboo_unigene_BMK_25793;Munro_Bamboo_unigene_BMK_27108;Munro_Bamboo_unigene_BMK_27565;Munro_Bamboo_unigene_BMK_31491;Munro_Bamboo_unigene_BMK_34826;Munro_Bamboo_unigene_BMK_3671;Munro_Bamboo_unigene_BMK_367…	K04371+K07203+K04368+K04371+K02183+K04371+K04371+K04371+K04371+K04371+K06620+K02183+K02183+K07203+K07203+K02183+K04371+K04371+K04371+K07203+K07203+K07203+K07203+K04368+K04368+K02183+K04371+K07203+K07203+K07203+K01110+K04371
Glucosinolate biosynthesis	2	Munro_Bamboo_unigene_BMK_4187;Munro_Bamboo_unigene_BMK_62718;	K13027+K13027
Glutathione metabolism	103	Munro_Bamboo_unigene_BMK_10065;Munro_Bamboo_unigene_BMK_10066;Munro_Bamboo_unigene_BMK_10228;Munro_Bamboo_unigene_BMK_10950;Munro_Bamboo_unigene_BMK_11506;Munro_Bamboo_unigene_BMK_11884;Munro_Bamboo_unigene_BMK_12218;Munro_Bamboo_unigene_BMK_12343;Munro_Bamboo_unigene_BMK_12350;Munro_Bamboo_unigene_BMK_12630;Munro_Bamboo_unigene_BMK_12691;Munro_Bamboo_unigene_BMK_13410;Munro_Bamboo_unigene_BMK_14…	K00799+K00799+K00432+K01919+K00434+K00383+K00799+K00033+K00797+K00036+K00432+K10807+K00033+K00434+K00036+K00434+K00681+K00434+K01256+K00033+K00799+K10807+K00434+K00434+K00434+K10807+K00432+K00681+K10807+K00434+K00383+K00681+K00036+K01255+K00031+K01919+K01920+K00036+K00799+K00432+K00797+K10808+K00681+K00432+K00681+K00434+K00383+K01920+K00383+K00036+K00432+K00432+K00799+K00383+K00036+K00681+K00434+…
Glycan bindng proteins	23	Munro_Bamboo_unigene_BMK_104;Munro_Bamboo_unigene_BMK_105;Munro_Bamboo_unigene_BMK_12817;Munro_Bamboo_unigene_BMK_15887;Munro_Bamboo_unigene_BMK_17541;Munro_Bamboo_unigene_BMK_21386;Munro_Bamboo_unigene_BMK_35030;Munro_Bamboo_unigene_BMK_37416;Munro_Bamboo_unigene_BMK_3954;Munro_Bamboo_unigene_BMK_39665;Munro_Bamboo_unigene_BMK_42713;Munro_Bamboo_unigene_BMK_48139;Munro_Bamboo_unigene_BMK_48631;M…	K08054+K08054+K08288+K10085+K08057+K08054+K10085+K08288+K08057+K08054+K08054+K08054+K08057+K08288+K08054+K08057+K08054+K08057+K08288+K10085+K08057+K08288+K08288
Glycerolipid metabolism	97	Munro_Bamboo_unigene_BMK_10679;Munro_Bamboo_unigene_BMK_10845;Munro_Bamboo_unigene_BMK_11032;Munro_Bamboo_unigene_BMK_12096;Munro_Bamboo_unigene_BMK_12377;Munro_Bamboo_unigene_BMK_12594;Munro_Bamboo_unigene_BMK_13176;Munro_Bamboo_unigene_BMK_15404;Munro_Bamboo_unigene_BMK_15789;Munro_Bamboo_unigene_BMK_16600;Munro_Bamboo_unigene_BMK_16606;Munro_Bamboo_unigene_BMK_16877;Munro_Bamboo_unigene_BMK_17…	K13513+K00630+K00128+K14085+K00128+K00679+K00128+K00864+K13513+K00901+K09480+K07407+K00128+K13513+K09480+K00679+K14085+K00630+K00002+K00655+K07407+K00864+K00901+K09480+K13513+K13513+K14674+K09480+K00128+K00655+K13508+K07407+K14674+K03715+K06119+K11155+K00679+K13508+K03715+K03715+K14674+K00901+K07407+K00128+K07407+K13508+K09480+K09480+K03715+K00630+K09480+K06119+K07407+K13513+K14674+K09480+K13508+…
Glycerophospholipid metabolism	119	Munro_Bamboo_unigene_BMK_1059;Munro_Bamboo_unigene_BMK_10679;Munro_Bamboo_unigene_BMK_10845;Munro_Bamboo_unigene_BMK_11771;Munro_Bamboo_unigene_BMK_11772;Munro_Bamboo_unigene_BMK_11773;Munro_Bamboo_unigene_BMK_13520;Munro_Bamboo_unigene_BMK_14263;Munro_Bamboo_unigene_BMK_15239;Munro_Bamboo_unigene_BMK_15789;Munro_Bamboo_unigene_BMK_16600;Munro_Bamboo_unigene_BMK_16859;Munro_Bamboo_unigene_BMK_177…	K06130+K13513+K00630+K00999+K00999+K00999+K13511+K01613+K00981+K13513+K00901+K01114+K01115+K13513+K01115+K00630+K00655+K01047+K01115+K00901+K01114+K13513+K13513+K00981+K00995+K00111+K14674+K01047+K13510+K00655+K01115+K13510+K13508+K01047+K14674+K13511+K01114+K01114+K13508+K01114+K14674+K00901+K06129+K01114+K01115+K08730+K08730+K01126+K00968+K01115+K01115+K13508+K00894+K00967+K01115+K01114+K00866+…
Glycine, serine and threonine metabolism	81	Munro_Bamboo_unigene_BMK_10581;Munro_Bamboo_unigene_BMK_11252;Munro_Bamboo_unigene_BMK_11376;Munro_Bamboo_unigene_BMK_11550;Munro_Bamboo_unigene_BMK_12096;Munro_Bamboo_unigene_BMK_12456;Munro_Bamboo_unigene_BMK_12573;Munro_Bamboo_unigene_BMK_13886;Munro_Bamboo_unigene_BMK_14317;Munro_Bamboo_unigene_BMK_14702;Munro_Bamboo_unigene_BMK_15373;Munro_Bamboo_unigene_BMK_15466;Munro_Bamboo_unigene_BMK_16…	K00281+K00382+K00133+K00827+K14085+K00276+K01733+K01733+K00830+K01620+K00382+K01733+K01620+K00605+K00058+K00827+K14085+K00382+K00382+K00827+K00827+K00058+K00928+K00382+K00600+K00281+K00281+K00281+K00928+K00281+K00130+K12235+K12524+K00058+K00872+K00872+K06001+K12524+K00600+K00382+K01079+K01079+K00281+K12235+K00600+K00600+K00133+K00058+K01695+K01695+K00831+K00600+K00872+K00382+K01733+K00600+K00830+…
Glycolysis / Gluconeogenesis	241	Munro_Bamboo_unigene_BMK_10289;Munro_Bamboo_unigene_BMK_10290;Munro_Bamboo_unigene_BMK_11032;Munro_Bamboo_unigene_BMK_11062;Munro_Bamboo_unigene_BMK_11066;Munro_Bamboo_unigene_BMK_11088;Munro_Bamboo_unigene_BMK_11214;Munro_Bamboo_unigene_BMK_11252;Munro_Bamboo_unigene_BMK_11783;Munro_Bamboo_unigene_BMK_11785;Munro_Bamboo_unigene_BMK_11913;Munro_Bamboo_unigene_BMK_1205;Munro_Bamboo_unigene_BMK_120…	K00162+K00162+K00128+K00134+K00001+K00001+K00627+K00382+K01568+K01568+K00161+K03841+K00844+K14085+K01810+K01810+K00128+K01689+K01834+K00927+K00128+K01834+K01792+K00001+K01895+K00627+K00382+K01568+K01623+K01689+K01785+K00161+K00873+K00927+K00128+K01792+K01792+K01834+K01623+K00001+K14085+K01785+K03841+K00002+K00382+K00850+K00382+K01810+K01810+K03841+K00850+K00850+K00927+K00627+K00382+K00001+K01610+…
Glycosaminoglycan biosynthesis - chondroitin sulfate	1	Munro_Bamboo_unigene_BMK_67907;	K00771
Glycosaminoglycan biosynthesis - heparan sulfate	1	Munro_Bamboo_unigene_BMK_67907;	K00771
Glycosaminoglycan degradation	18	Munro_Bamboo_unigene_BMK_10659;Munro_Bamboo_unigene_BMK_1672;Munro_Bamboo_unigene_BMK_18877;Munro_Bamboo_unigene_BMK_25323;Munro_Bamboo_unigene_BMK_25411;Munro_Bamboo_unigene_BMK_34671;Munro_Bamboo_unigene_BMK_39764;Munro_Bamboo_unigene_BMK_40149;Munro_Bamboo_unigene_BMK_40381;Munro_Bamboo_unigene_BMK_43630;Munro_Bamboo_unigene_BMK_46072;Munro_Bamboo_unigene_BMK_50571;Munro_Bamboo_unigene_BMK_567…	K10532+K01205+K12373+K12309+K12373+K01205+K12309+K12373+K12373+K12373+K12373+K12373+K12373+K12373+K01205+K12309+K01205+K01205
Glycosphingolipid biosynthesis - ganglio series	12	Munro_Bamboo_unigene_BMK_18877;Munro_Bamboo_unigene_BMK_25323;Munro_Bamboo_unigene_BMK_25411;Munro_Bamboo_unigene_BMK_39764;Munro_Bamboo_unigene_BMK_40149;Munro_Bamboo_unigene_BMK_40381;Munro_Bamboo_unigene_BMK_43630;Munro_Bamboo_unigene_BMK_46072;Munro_Bamboo_unigene_BMK_50571;Munro_Bamboo_unigene_BMK_5679;Munro_Bamboo_unigene_BMK_60525;Munro_Bamboo_unigene_BMK_7091;	K12373+K12309+K12373+K12309+K12373+K12373+K12373+K12373+K12373+K12373+K12373+K12309
Glycosphingolipid biosynthesis - globo series	19	Munro_Bamboo_unigene_BMK_16877;Munro_Bamboo_unigene_BMK_18877;Munro_Bamboo_unigene_BMK_21870;Munro_Bamboo_unigene_BMK_25411;Munro_Bamboo_unigene_BMK_28850;Munro_Bamboo_unigene_BMK_34507;Munro_Bamboo_unigene_BMK_3867;Munro_Bamboo_unigene_BMK_40149;Munro_Bamboo_unigene_BMK_40381;Munro_Bamboo_unigene_BMK_43630;Munro_Bamboo_unigene_BMK_46072;Munro_Bamboo_unigene_BMK_47327;Munro_Bamboo_unigene_BMK_505…	K07407+K12373+K07407+K12373+K07407+K07407+K07407+K12373+K12373+K12373+K12373+K07407+K12373+K01988+K12373+K07407+K12373+K07407+K07407
Glycosylphosphatidylinositol(GPI)-anchor biosynthesis	50	Munro_Bamboo_unigene_BMK_13122;Munro_Bamboo_unigene_BMK_13561;Munro_Bamboo_unigene_BMK_13846;Munro_Bamboo_unigene_BMK_15831;Munro_Bamboo_unigene_BMK_17131;Munro_Bamboo_unigene_BMK_17987;Munro_Bamboo_unigene_BMK_19343;Munro_Bamboo_unigene_BMK_21195;Munro_Bamboo_unigene_BMK_2367;Munro_Bamboo_unigene_BMK_24002;Munro_Bamboo_unigene_BMK_24252;Munro_Bamboo_unigene_BMK_2541;Munro_Bamboo_unigene_BMK_2731…	K05285+K07541+K07541+K03858+K07541+K09658+K05310+K05285+K03857+K03861+K03859+K05293+K05293+K05284+K05284+K05310+K05289+K05289+K03859+K07542+K05310+K09658+K03858+K05285+K09658+K05284+K05284+K03858+K03859+K05285+K03858+K03861+K03434+K07542+K03859+K05310+K05284+K05310+K05284+K05284+K03434+K03858+K05284+K07542+K05292+K05293+K05310+K03861+K03858+K05286
Glycosyltransferases	318	Munro_Bamboo_unigene_BMK_10101;Munro_Bamboo_unigene_BMK_1018;Munro_Bamboo_unigene_BMK_10235;Munro_Bamboo_unigene_BMK_10415;Munro_Bamboo_unigene_BMK_10562;Munro_Bamboo_unigene_BMK_10721;Munro_Bamboo_unigene_BMK_11024;Munro_Bamboo_unigene_BMK_11025;Munro_Bamboo_unigene_BMK_11077;Munro_Bamboo_unigene_BMK_11130;Munro_Bamboo_unigene_BMK_11237;Munro_Bamboo_unigene_BMK_11238;Munro_Bamboo_unigene_BMK_114…	K09660+K03847+K00697+K10999+K11000+K03848+K11000+K11000+K11718+K03691+K09667+K09667+K08238+K08238+K03846+K11000+K03843+K11000+K10999+K10999+K10999+K10999+K00726+K03844+K13680+K11000+K00703+K10999+K05841+K13648+K00695+K10999+K10999+K09480+K00770+K11000+K13691+K09667+K14412+K13648+K14413+K00703+K09480+K13648+K13648+K03714+K11000+K11000+K00721+K00753+K11000+K11000+K13691+K00695+K05841+K00703+K13648+…
Glyoxylate and dicarboxylate metabolism	64	Munro_Bamboo_unigene_BMK_10104;Munro_Bamboo_unigene_BMK_112;Munro_Bamboo_unigene_BMK_1153;Munro_Bamboo_unigene_BMK_11664;Munro_Bamboo_unigene_BMK_12341;Munro_Bamboo_unigene_BMK_13072;Munro_Bamboo_unigene_BMK_13251;Munro_Bamboo_unigene_BMK_13388;Munro_Bamboo_unigene_BMK_1361;Munro_Bamboo_unigene_BMK_15810;Munro_Bamboo_unigene_BMK_15851;Munro_Bamboo_unigene_BMK_16540;Munro_Bamboo_unigene_BMK_17118;…	K01455+K00025+K00626+K01602+K00026+K01602+K00025+K00026+K00026+K00026+K11517+K01638+K00026+K01681+K00122+K00122+K11517+K00026+K01602+K11517+K01647+K11517+K00026+K11517+K01647+K11517+K11517+K01602+K01681+K01681+K11517+K11517+K00026+K11517+K11517+K11517+K01602+K01602+K00626+K01602+K00122+K01433+K00626+K01647+K01681+K11517+K11517+K11517+K11517+K00025+K01602+K00626+K01601+K00026+K00026+K00026+K11517+…
GnRH signaling pathway	42	Munro_Bamboo_unigene_BMK_10992;Munro_Bamboo_unigene_BMK_15796;Munro_Bamboo_unigene_BMK_17186;Munro_Bamboo_unigene_BMK_17795;Munro_Bamboo_unigene_BMK_18422;Munro_Bamboo_unigene_BMK_18672;Munro_Bamboo_unigene_BMK_21953;Munro_Bamboo_unigene_BMK_22165;Munro_Bamboo_unigene_BMK_24620;Munro_Bamboo_unigene_BMK_25793;Munro_Bamboo_unigene_BMK_25812;Munro_Bamboo_unigene_BMK_27108;Munro_Bamboo_unigene_BMK_27…	K04371+K04368+K04371+K01115+K01115+K02183+K01047+K01115+K04371+K04371+K01047+K04371+K04371+K01115+K01047+K04371+K01115+K02183+K02183+K01115+K01115+K01115+K01115+K01115+K02183+K04371+K04371+K04371+K01115+K01115+K04368+K04368+K01047+K02183+K04371+K01047+K01047+K01115+K01115+K01115+K01115+K04371
Hedgehog signaling pathway	18	Munro_Bamboo_unigene_BMK_23742;Munro_Bamboo_unigene_BMK_2467;Munro_Bamboo_unigene_BMK_30342;Munro_Bamboo_unigene_BMK_31480;Munro_Bamboo_unigene_BMK_3332;Munro_Bamboo_unigene_BMK_3333;Munro_Bamboo_unigene_BMK_3335;Munro_Bamboo_unigene_BMK_40628;Munro_Bamboo_unigene_BMK_43844;Munro_Bamboo_unigene_BMK_47857;Munro_Bamboo_unigene_BMK_48864;Munro_Bamboo_unigene_BMK_49077;Munro_Bamboo_unigene_BMK_54525;…	K02218+K06228+K06228+K03083+K02218+K02218+K02218+K02218+K02218+K03083+K03083+K06228+K06228+K06228+K06228+K02218+K06228+K06228
Hepatitis C	37	Munro_Bamboo_unigene_BMK_10992;Munro_Bamboo_unigene_BMK_11693;Munro_Bamboo_unigene_BMK_17186;Munro_Bamboo_unigene_BMK_20871;Munro_Bamboo_unigene_BMK_20917;Munro_Bamboo_unigene_BMK_24620;Munro_Bamboo_unigene_BMK_25793;Munro_Bamboo_unigene_BMK_26665;Munro_Bamboo_unigene_BMK_27108;Munro_Bamboo_unigene_BMK_27565;Munro_Bamboo_unigene_BMK_29496;Munro_Bamboo_unigene_BMK_2991;Munro_Bamboo_unigene_BMK_314…	K04371+K04382+K04371+K03456+K04382+K04371+K04371+K04382+K04371+K04371+K03456+K04382+K03250+K03083+K04371+K04354+K04354+K04354+K03456+K03456+K04382+K03250+K03237+K04382+K03083+K03083+K03237+K04371+K04371+K04371+K04382+K04371+K04382+K04382+K04354+K04354+K04371
Histidine metabolism	33	Munro_Bamboo_unigene_BMK_11032;Munro_Bamboo_unigene_BMK_11489;Munro_Bamboo_unigene_BMK_11490;Munro_Bamboo_unigene_BMK_12096;Munro_Bamboo_unigene_BMK_12215;Munro_Bamboo_unigene_BMK_12275;Munro_Bamboo_unigene_BMK_12377;Munro_Bamboo_unigene_BMK_13176;Munro_Bamboo_unigene_BMK_17641;Munro_Bamboo_unigene_BMK_1872;Munro_Bamboo_unigene_BMK_19825;Munro_Bamboo_unigene_BMK_21772;Munro_Bamboo_unigene_BMK_227…	K00128+K01663+K01663+K14085+K00765+K00765+K00128+K00128+K00128+K01693+K14085+K00817+K01663+K00128+K11755+K00599+K00817+K00128+K01663+K00599+K01590+K01590+K00128+K00128+K00128+K00128+K00128+K01814+K14085+K00599+K00599+K00599+K00013
Homologous recombination	82	Munro_Bamboo_unigene_BMK_1027;Munro_Bamboo_unigene_BMK_1028;Munro_Bamboo_unigene_BMK_10419;Munro_Bamboo_unigene_BMK_10776;Munro_Bamboo_unigene_BMK_13244;Munro_Bamboo_unigene_BMK_13959;Munro_Bamboo_unigene_BMK_15533;Munro_Bamboo_unigene_BMK_16384;Munro_Bamboo_unigene_BMK_18526;Munro_Bamboo_unigene_BMK_1933;Munro_Bamboo_unigene_BMK_19501;Munro_Bamboo_unigene_BMK_20202;Munro_Bamboo_unigene_BMK_20465…	K04482+K04482+K10865+K10739+K10901+K07466+K07466+K03553+K04482+K02327+K10739+K03553+K10866+K02335+K07466+K10865+K10739+K10881+K10881+K03504+K04482+K07466+K08991+K10871+K10871+K10865+K03655+K10739+K10866+K02327+K07466+K03655+K03553+K07466+K10879+K07466+K10881+K10881+K10866+K02328+K03165+K02335+K10875+K10901+K08991+K10901+K10865+K02328+K07466+K10865+K07466+K03553+K10869+K10739+K07466+K03111+K07466+…
Huntington's disease	217	Munro_Bamboo_unigene_BMK_10210;Munro_Bamboo_unigene_BMK_10211;Munro_Bamboo_unigene_BMK_10272;Munro_Bamboo_unigene_BMK_10284;Munro_Bamboo_unigene_BMK_10285;Munro_Bamboo_unigene_BMK_10697;Munro_Bamboo_unigene_BMK_10819;Munro_Bamboo_unigene_BMK_11209;Munro_Bamboo_unigene_BMK_1133;Munro_Bamboo_unigene_BMK_1134;Munro_Bamboo_unigene_BMK_1147;Munro_Bamboo_unigene_BMK_11587;Munro_Bamboo_unigene_BMK_11588…	K00413+K00413+K03006+K11644+K11644+K11644+K03017+K06067+K06067+K06067+K06067+K03120+K03120+K05864+K05864+K03942+K02138+K02138+K03955+K04565+K04565+K04565+K02267+K02267+K11824+K02126+K05863+K04565+K04498+K03006+K03941+K03007+K03016+K03941+K11644+K11644+K04498+K02133+K00419+K03006+K03955+K04498+K04498+K03016+K06067+K05864+K04564+K02256+K06067+K04498+K03006+K04498+K03943+K06067+K03010+K02267+K03008+…
Hypertrophic cardiomyopathy (HCM)	7	Munro_Bamboo_unigene_BMK_16468;Munro_Bamboo_unigene_BMK_16806;Munro_Bamboo_unigene_BMK_30204;Munro_Bamboo_unigene_BMK_38810;Munro_Bamboo_unigene_BMK_62188;Munro_Bamboo_unigene_BMK_66793;Munro_Bamboo_unigene_BMK_9441;	K07198+K07199+K07198+K07198+K07199+K05692+K07199
Inositol phosphate metabolism	86	Munro_Bamboo_unigene_BMK_1121;Munro_Bamboo_unigene_BMK_1122;Munro_Bamboo_unigene_BMK_11681;Munro_Bamboo_unigene_BMK_11771;Munro_Bamboo_unigene_BMK_11772;Munro_Bamboo_unigene_BMK_11773;Munro_Bamboo_unigene_BMK_12994;Munro_Bamboo_unigene_BMK_13005;Munro_Bamboo_unigene_BMK_14847;Munro_Bamboo_unigene_BMK_16859;Munro_Bamboo_unigene_BMK_1739;Munro_Bamboo_unigene_BMK_17893;Munro_Bamboo_unigene_BMK_19155…	K00913+K00913+K00888+K00999+K00999+K00999+K05857+K00888+K00889+K01114+K00889+K00888+K00913+K05857+K00889+K00889+K01114+K00889+K00913+K00888+K00889+K00889+K00889+K01114+K01114+K00889+K01114+K05857+K01114+K00921+K00921+K05857+K00140+K01858+K01803+K00889+K01114+K00913+K01114+K00913+K01092+K05857+K01099+K01114+K00889+K01114+K00921+K00889+K01107+K00889+K00889+K00889+K05857+K00913+K00469+K05857+K00889+…
Insulin signaling pathway	145	Munro_Bamboo_unigene_BMK_10992;Munro_Bamboo_unigene_BMK_1205;Munro_Bamboo_unigene_BMK_12076;Munro_Bamboo_unigene_BMK_12086;Munro_Bamboo_unigene_BMK_12337;Munro_Bamboo_unigene_BMK_12369;Munro_Bamboo_unigene_BMK_13872;Munro_Bamboo_unigene_BMK_15353;Munro_Bamboo_unigene_BMK_15560;Munro_Bamboo_unigene_BMK_15796;Munro_Bamboo_unigene_BMK_16468;Munro_Bamboo_unigene_BMK_16774;Munro_Bamboo_unigene_BMK_167…	K04371+K03841+K00844+K07195+K02991+K07195+K07203+K11262+K07204+K04368+K07198+K03259+K11262+K07199+K04371+K11262+K02183+K07204+K07195+K11262+K03841+K07195+K03841+K07195+K07204+K07195+K07195+K03259+K04371+K00688+K04371+K06276+K07195+K04371+K04371+K07195+K07195+K11262+K06269+K07195+K07195+K07198+K03083+K04371+K00844+K07195+K07195+K07195+K06269+K00844+K06276+K02991+K02183+K02183+K07195+K07195+K06269+…
Ion channels	61	Munro_Bamboo_unigene_BMK_11370;Munro_Bamboo_unigene_BMK_17571;Munro_Bamboo_unigene_BMK_18267;Munro_Bamboo_unigene_BMK_18860;Munro_Bamboo_unigene_BMK_21102;Munro_Bamboo_unigene_BMK_21111;Munro_Bamboo_unigene_BMK_23756;Munro_Bamboo_unigene_BMK_23862;Munro_Bamboo_unigene_BMK_2461;Munro_Bamboo_unigene_BMK_2462;Munro_Bamboo_unigene_BMK_25190;Munro_Bamboo_unigene_BMK_25293;Munro_Bamboo_unigene_BMK_2549…	K09873+K09872+K09873+K09873+K09873+K05391+K09873+K05016+K05391+K05391+K05016+K09873+K09873+K05391+K09875+K05391+K09872+K09872+K09874+K09872+K05391+K05391+K09872+K05016+K09872+K05387+K09873+K05016+K09872+K09872+K05391+K05019+K09873+K05387+K05391+K05016+K09873+K09873+K09873+K05016+K05019+K05019+K05391+K09872+K09872+K09872+K05391+K09874+K09873+K09874+K09873+K05389+K05391+K09874+K09872+K09872+K09874+…
Isoquinoline alkaloid biosynthesis	13	Munro_Bamboo_unigene_BMK_10820;Munro_Bamboo_unigene_BMK_12456;Munro_Bamboo_unigene_BMK_13876;Munro_Bamboo_unigene_BMK_21019;Munro_Bamboo_unigene_BMK_22675;Munro_Bamboo_unigene_BMK_40569;Munro_Bamboo_unigene_BMK_47698;Munro_Bamboo_unigene_BMK_52140;Munro_Bamboo_unigene_BMK_60370;Munro_Bamboo_unigene_BMK_62400;Munro_Bamboo_unigene_BMK_64340;Munro_Bamboo_unigene_BMK_64662;Munro_Bamboo_unigene_BMK_78…	K00815+K00276+K01592+K00813+K00815+K00813+K00815+K00815+K00813+K00276+K01592+K00276+K00815
Jak-STAT signaling pathway	20	Munro_Bamboo_unigene_BMK_14854;Munro_Bamboo_unigene_BMK_1792;Munro_Bamboo_unigene_BMK_19223;Munro_Bamboo_unigene_BMK_19954;Munro_Bamboo_unigene_BMK_23879;Munro_Bamboo_unigene_BMK_24585;Munro_Bamboo_unigene_BMK_30108;Munro_Bamboo_unigene_BMK_31662;Munro_Bamboo_unigene_BMK_37036;Munro_Bamboo_unigene_BMK_3706;Munro_Bamboo_unigene_BMK_38190;Munro_Bamboo_unigene_BMK_38270;Munro_Bamboo_unigene_BMK_4804…	K04498+K04498+K04498+K04498+K04498+K04498+K04498+K04498+K04498+K04498+K04498+K04498+K04498+K04498+K04498+K04498+K04498+K04498+K04498+K04498
Leishmaniasis	16	Munro_Bamboo_unigene_BMK_10992;Munro_Bamboo_unigene_BMK_17186;Munro_Bamboo_unigene_BMK_1903;Munro_Bamboo_unigene_BMK_21674;Munro_Bamboo_unigene_BMK_24620;Munro_Bamboo_unigene_BMK_25793;Munro_Bamboo_unigene_BMK_27108;Munro_Bamboo_unigene_BMK_27565;Munro_Bamboo_unigene_BMK_31491;Munro_Bamboo_unigene_BMK_5118;Munro_Bamboo_unigene_BMK_5119;Munro_Bamboo_unigene_BMK_51698;Munro_Bamboo_unigene_BMK_59565…	K04371+K04371+K01404+K01404+K04371+K04371+K04371+K04371+K04371+K04371+K04371+K04371+K04371+K01404+K04733+K04371
Leukocyte transendothelial migration	23	Munro_Bamboo_unigene_BMK_12381;Munro_Bamboo_unigene_BMK_15446;Munro_Bamboo_unigene_BMK_15508;Munro_Bamboo_unigene_BMK_18311;Munro_Bamboo_unigene_BMK_20285;Munro_Bamboo_unigene_BMK_21706;Munro_Bamboo_unigene_BMK_24621;Munro_Bamboo_unigene_BMK_24961;Munro_Bamboo_unigene_BMK_265;Munro_Bamboo_unigene_BMK_266;Munro_Bamboo_unigene_BMK_267;Munro_Bamboo_unigene_BMK_27440;Munro_Bamboo_unigene_BMK_27738;Mu…	K04392+K04392+K04392+K04392+K04392+K04392+K04392+K04392+K04392+K04392+K04392+K04392+K04392+K04392+K06274+K04392+K04392+K04392+K04392+K04392+K04392+K04392+K05692
Limonene and pinene degradation	23	Munro_Bamboo_unigene_BMK_11032;Munro_Bamboo_unigene_BMK_12312;Munro_Bamboo_unigene_BMK_12377;Munro_Bamboo_unigene_BMK_13176;Munro_Bamboo_unigene_BMK_17641;Munro_Bamboo_unigene_BMK_26730;Munro_Bamboo_unigene_BMK_27279;Munro_Bamboo_unigene_BMK_3719;Munro_Bamboo_unigene_BMK_39438;Munro_Bamboo_unigene_BMK_45163;Munro_Bamboo_unigene_BMK_5107;Munro_Bamboo_unigene_BMK_56751;Munro_Bamboo_unigene_BMK_5706…	K00128+K00120+K00128+K00128+K00128+K01692+K00128+K00128+K00517+K00517+K00517+K00128+K00517+K00128+K00517+K00517+K00128+K01692+K00128+K00128+K00517+K01692+K01692
Linoleic acid metabolism	30	Munro_Bamboo_unigene_BMK_2099;Munro_Bamboo_unigene_BMK_21953;Munro_Bamboo_unigene_BMK_25052;Munro_Bamboo_unigene_BMK_25537;Munro_Bamboo_unigene_BMK_25812;Munro_Bamboo_unigene_BMK_26687;Munro_Bamboo_unigene_BMK_29419;Munro_Bamboo_unigene_BMK_29582;Munro_Bamboo_unigene_BMK_30034;Munro_Bamboo_unigene_BMK_33739;Munro_Bamboo_unigene_BMK_35554;Munro_Bamboo_unigene_BMK_38599;Munro_Bamboo_unigene_BMK_402…	K00454+K01047+K00454+K14674+K01047+K00454+K01047+K14674+K00454+K14674+K00454+K00454+K00454+K00454+K00454+K14674+K00454+K14674+K14674+K00454+K01047+K01047+K00454+K00454+K00454+K00454+K00454+K14674+K01047+K14674
Lipid biosynthesis proteins	141	Munro_Bamboo_unigene_BMK_10537;Munro_Bamboo_unigene_BMK_10679;Munro_Bamboo_unigene_BMK_10845;Munro_Bamboo_unigene_BMK_10946;Munro_Bamboo_unigene_BMK_11396;Munro_Bamboo_unigene_BMK_11397;Munro_Bamboo_unigene_BMK_11882;Munro_Bamboo_unigene_BMK_11883;Munro_Bamboo_unigene_BMK_12603;Munro_Bamboo_unigene_BMK_12768;Munro_Bamboo_unigene_BMK_13030;Munro_Bamboo_unigene_BMK_13520;Munro_Bamboo_unigene_BMK_14…	K10703+K13513+K00630+K10251+K10781+K10781+K10781+K10781+K10782+K00208+K00507+K13511+K09458+K09458+K10257+K01895+K09458+K13513+K10703+K01897+K09458+K13513+K04712+K04712+K00630+K00655+K02372+K03921+K10781+K13513+K00142+K13513+K04712+K01897+K01897+K00059+K01897+K13510+K10781+K00655+K13510+K13508+K13511+K10781+K13508+K00059+K00059+K09458+K00059+K10703+K03921+K01897+K03921+K01897+K01897+K00507+K01895+…
Lipoic acid metabolism	8	Munro_Bamboo_unigene_BMK_10760;Munro_Bamboo_unigene_BMK_14616;Munro_Bamboo_unigene_BMK_21253;Munro_Bamboo_unigene_BMK_26334;Munro_Bamboo_unigene_BMK_4710;Munro_Bamboo_unigene_BMK_52454;Munro_Bamboo_unigene_BMK_61314;Munro_Bamboo_unigene_BMK_66966;	K03644+K03644+K03644+K03644+K03801+K03801+K03644+K03801
Lipopolysaccharide biosynthesis	16	Munro_Bamboo_unigene_BMK_12084;Munro_Bamboo_unigene_BMK_12958;Munro_Bamboo_unigene_BMK_19142;Munro_Bamboo_unigene_BMK_22096;Munro_Bamboo_unigene_BMK_23964;Munro_Bamboo_unigene_BMK_25027;Munro_Bamboo_unigene_BMK_30283;Munro_Bamboo_unigene_BMK_30543;Munro_Bamboo_unigene_BMK_34921;Munro_Bamboo_unigene_BMK_35937;Munro_Bamboo_unigene_BMK_36034;Munro_Bamboo_unigene_BMK_39499;Munro_Bamboo_unigene_BMK_45…	K00677+K01627+K00677+K00677+K00677+K02527+K02535+K01627+K02527+K02527+K00748+K02535+K00979+K02527+K02527+K00677
Lipopolysaccharide biosynthesis proteins	16	Munro_Bamboo_unigene_BMK_12084;Munro_Bamboo_unigene_BMK_12958;Munro_Bamboo_unigene_BMK_19142;Munro_Bamboo_unigene_BMK_22096;Munro_Bamboo_unigene_BMK_23964;Munro_Bamboo_unigene_BMK_25027;Munro_Bamboo_unigene_BMK_30283;Munro_Bamboo_unigene_BMK_30543;Munro_Bamboo_unigene_BMK_34921;Munro_Bamboo_unigene_BMK_35937;Munro_Bamboo_unigene_BMK_36034;Munro_Bamboo_unigene_BMK_39499;Munro_Bamboo_unigene_BMK_45…	K00677+K01627+K00677+K00677+K00677+K02527+K02535+K01627+K02527+K02527+K00748+K02535+K00979+K02527+K02527+K00677
Long-term depression	34	Munro_Bamboo_unigene_BMK_10992;Munro_Bamboo_unigene_BMK_11693;Munro_Bamboo_unigene_BMK_15796;Munro_Bamboo_unigene_BMK_17186;Munro_Bamboo_unigene_BMK_20871;Munro_Bamboo_unigene_BMK_20917;Munro_Bamboo_unigene_BMK_21953;Munro_Bamboo_unigene_BMK_24620;Munro_Bamboo_unigene_BMK_25793;Munro_Bamboo_unigene_BMK_25812;Munro_Bamboo_unigene_BMK_26665;Munro_Bamboo_unigene_BMK_27108;Munro_Bamboo_unigene_BMK_27…	K04371+K04382+K04368+K04371+K03456+K04382+K01047+K04371+K04371+K01047+K04382+K04371+K04371+K01047+K03456+K04382+K04371+K03456+K03456+K04382+K04382+K04371+K04371+K04371+K04382+K04368+K04368+K01047+K04371+K01047+K01047+K04382+K04382+K04371
Long-term potentiation	57	Munro_Bamboo_unigene_BMK_10992;Munro_Bamboo_unigene_BMK_12388;Munro_Bamboo_unigene_BMK_14854;Munro_Bamboo_unigene_BMK_15796;Munro_Bamboo_unigene_BMK_17186;Munro_Bamboo_unigene_BMK_1792;Munro_Bamboo_unigene_BMK_18672;Munro_Bamboo_unigene_BMK_19223;Munro_Bamboo_unigene_BMK_19398;Munro_Bamboo_unigene_BMK_19954;Munro_Bamboo_unigene_BMK_23879;Munro_Bamboo_unigene_BMK_24585;Munro_Bamboo_unigene_BMK_246…	K04371+K06268+K04498+K04368+K04371+K04498+K02183+K04498+K06268+K04498+K04498+K04498+K04371+K04371+K04371+K04371+K06268+K06269+K04498+K04371+K04498+K06268+K06269+K06268+K02183+K02183+K06268+K04498+K04498+K06269+K04498+K04498+K06269+K06269+K04498+K06269+K02183+K04371+K04371+K04371+K04498+K04498+K04498+K04368+K04368+K06268+K06268+K02183+K04371+K04498+K04498+K04498+K06268+K06268+K06268+K04498+K04371
Lysine biosynthesis	30	Munro_Bamboo_unigene_BMK_11376;Munro_Bamboo_unigene_BMK_12096;Munro_Bamboo_unigene_BMK_14972;Munro_Bamboo_unigene_BMK_19825;Munro_Bamboo_unigene_BMK_2237;Munro_Bamboo_unigene_BMK_2509;Munro_Bamboo_unigene_BMK_26198;Munro_Bamboo_unigene_BMK_26767;Munro_Bamboo_unigene_BMK_28262;Munro_Bamboo_unigene_BMK_30624;Munro_Bamboo_unigene_BMK_32201;Munro_Bamboo_unigene_BMK_32833;Munro_Bamboo_unigene_BMK_3682…	K00133+K14085+K01586+K14085+K00215+K00928+K00215+K00145+K01586+K00930+K00215+K00928+K00145+K12524+K01714+K12524+K14157+K01778+K00133+K00215+K00928+K00928+K01714+K00930+K14085+K00930+K12524+K12524+K10206+K00928
Lysine degradation	27	Munro_Bamboo_unigene_BMK_11032;Munro_Bamboo_unigene_BMK_1153;Munro_Bamboo_unigene_BMK_12096;Munro_Bamboo_unigene_BMK_12377;Munro_Bamboo_unigene_BMK_13176;Munro_Bamboo_unigene_BMK_17641;Munro_Bamboo_unigene_BMK_19825;Munro_Bamboo_unigene_BMK_26730;Munro_Bamboo_unigene_BMK_27279;Munro_Bamboo_unigene_BMK_29002;Munro_Bamboo_unigene_BMK_3452;Munro_Bamboo_unigene_BMK_3719;Munro_Bamboo_unigene_BMK_38125…	K00128+K00626+K14085+K00128+K00128+K00128+K14085+K01692+K00128+K00164+K00164+K00128+K00626+K14157+K00626+K11433+K00128+K00128+K00626+K00128+K01692+K00128+K00128+K14085+K00626+K01692+K01692
Lysosome	122	Munro_Bamboo_unigene_BMK_10659;Munro_Bamboo_unigene_BMK_10920;Munro_Bamboo_unigene_BMK_11132;Munro_Bamboo_unigene_BMK_11562;Munro_Bamboo_unigene_BMK_11902;Munro_Bamboo_unigene_BMK_11903;Munro_Bamboo_unigene_BMK_11904;Munro_Bamboo_unigene_BMK_13841;Munro_Bamboo_unigene_BMK_1672;Munro_Bamboo_unigene_BMK_17910;Munro_Bamboo_unigene_BMK_18877;Munro_Bamboo_unigene_BMK_19009;Munro_Bamboo_unigene_BMK_198…	K10532+K12385+K12347+K12403+K12391+K12391+K12391+K01366+K01205+K01369+K12373+K12385+K13289+K13289+K12398+K12397+K01366+K02155+K12309+K12373+K01369+K12400+K02155+K13289+K02154+K02154+K02155+K02155+K02155+K02155+K02155+K02155+K02155+K02155+K02155+K02154+K13289+K12397+K01369+K12397+K06129+K01205+K13289+K02154+K02144+K02155+K12391+K13289+K01369+K12397+K12396+K12309+K12396+K12373+K12373+K13289+K12385+…
MAPK signaling pathway	89	Munro_Bamboo_unigene_BMK_10847;Munro_Bamboo_unigene_BMK_10992;Munro_Bamboo_unigene_BMK_11051;Munro_Bamboo_unigene_BMK_11052;Munro_Bamboo_unigene_BMK_11053;Munro_Bamboo_unigene_BMK_12315;Munro_Bamboo_unigene_BMK_12381;Munro_Bamboo_unigene_BMK_12388;Munro_Bamboo_unigene_BMK_13534;Munro_Bamboo_unigene_BMK_15446;Munro_Bamboo_unigene_BMK_15508;Munro_Bamboo_unigene_BMK_15555;Munro_Bamboo_unigene_BMK_15…	K03283+K04371+K04460+K04460+K04460+K03283+K04392+K06268+K03283+K04392+K04392+K03283+K04368+K04459+K04459+K04459+K04371+K04392+K06268+K04392+K03283+K03283+K04392+K01047+K03283+K04371+K04392+K03283+K04392+K04371+K01047+K04392+K04392+K04392+K04371+K03283+K03283+K04392+K04371+K04392+K03283+K03283+K06268+K03283+K01047+K04392+K03283+K04371+K03283+K03283+K03283+K03283+K06268+K06268+K04392+K06268+K03283+…
MAPK signaling pathway - fly	15	Munro_Bamboo_unigene_BMK_10992;Munro_Bamboo_unigene_BMK_15796;Munro_Bamboo_unigene_BMK_17186;Munro_Bamboo_unigene_BMK_24620;Munro_Bamboo_unigene_BMK_25793;Munro_Bamboo_unigene_BMK_27108;Munro_Bamboo_unigene_BMK_27565;Munro_Bamboo_unigene_BMK_31491;Munro_Bamboo_unigene_BMK_5118;Munro_Bamboo_unigene_BMK_5119;Munro_Bamboo_unigene_BMK_51698;Munro_Bamboo_unigene_BMK_5697;Munro_Bamboo_unigene_BMK_5698;…	K04371+K04368+K04371+K04371+K04371+K04371+K04371+K04371+K04371+K04371+K04371+K04368+K04368+K04371+K04371
MAPK signaling pathway - yeast	15	Munro_Bamboo_unigene_BMK_1655;Munro_Bamboo_unigene_BMK_26219;Munro_Bamboo_unigene_BMK_29787;Munro_Bamboo_unigene_BMK_33522;Munro_Bamboo_unigene_BMK_3517;Munro_Bamboo_unigene_BMK_35846;Munro_Bamboo_unigene_BMK_39819;Munro_Bamboo_unigene_BMK_4002;Munro_Bamboo_unigene_BMK_46837;Munro_Bamboo_unigene_BMK_52429;Munro_Bamboo_unigene_BMK_53774;Munro_Bamboo_unigene_BMK_64220;Munro_Bamboo_unigene_BMK_65558…	K01759+K01759+K01759+K09291+K01759+K01759+K01759+K01759+K11238+K01759+K11238+K09291+K09291+K09291+K09291
Maturity onset diabetes of the young	1	Munro_Bamboo_unigene_BMK_29096;	K07595
Measles	56	Munro_Bamboo_unigene_BMK_10230;Munro_Bamboo_unigene_BMK_10847;Munro_Bamboo_unigene_BMK_11507;Munro_Bamboo_unigene_BMK_12168;Munro_Bamboo_unigene_BMK_12169;Munro_Bamboo_unigene_BMK_12315;Munro_Bamboo_unigene_BMK_13534;Munro_Bamboo_unigene_BMK_15555;Munro_Bamboo_unigene_BMK_20455;Munro_Bamboo_unigene_BMK_20566;Munro_Bamboo_unigene_BMK_2090;Munro_Bamboo_unigene_BMK_21490;Munro_Bamboo_unigene_BMK_219…	K03115+K03283+K10144+K03097+K03097+K03283+K03283+K03283+K10144+K03283+K03097+K03283+K03115+K03283+K03097+K03283+K10144+K03283+K03283+K03283+K03283+K03283+K03097+K03283+K03083+K03283+K03283+K03283+K14753+K14753+K14753+K10144+K03283+K03115+K03115+K03283+K14753+K03237+K03283+K10144+K03083+K03083+K03115+K03237+K03247+K03283+K03283+K03097+K03283+K10144+K03247+K03283+K03283+K03283+K03283+K04733
Meiosis - yeast	140	Munro_Bamboo_unigene_BMK_10236;Munro_Bamboo_unigene_BMK_11434;Munro_Bamboo_unigene_BMK_11435;Munro_Bamboo_unigene_BMK_11437;Munro_Bamboo_unigene_BMK_11693;Munro_Bamboo_unigene_BMK_1173;Munro_Bamboo_unigene_BMK_11796;Munro_Bamboo_unigene_BMK_11800;Munro_Bamboo_unigene_BMK_13234;Munro_Bamboo_unigene_BMK_13361;Munro_Bamboo_unigene_BMK_13776;Munro_Bamboo_unigene_BMK_14543;Munro_Bamboo_unigene_BMK_151…	K03349+K02540+K02540+K02540+K04382+K11584+K06671+K11584+K02604+K03348+K03348+K10878+K11584+K02830+K10872+K02605+K02365+K03354+K06628+K02537+K10872+K03357+K02214+K06669+K03351+K03456+K02540+K04382+K03348+K06636+K10878+K02214+K02607+K10878+K02606+K02178+K11584+K03352+K04382+K02178+K02178+K03363+K03355+K10872+K06269+K11584+K03456+K03350+K04382+K02214+K02213+K02542+K03352+K03351+K12761+K03456+K03456+…
Melanogenesis	43	Munro_Bamboo_unigene_BMK_10992;Munro_Bamboo_unigene_BMK_14854;Munro_Bamboo_unigene_BMK_15796;Munro_Bamboo_unigene_BMK_17186;Munro_Bamboo_unigene_BMK_1792;Munro_Bamboo_unigene_BMK_18672;Munro_Bamboo_unigene_BMK_19223;Munro_Bamboo_unigene_BMK_19954;Munro_Bamboo_unigene_BMK_23879;Munro_Bamboo_unigene_BMK_24585;Munro_Bamboo_unigene_BMK_24620;Munro_Bamboo_unigene_BMK_25793;Munro_Bamboo_unigene_BMK_271…	K04371+K04498+K04368+K04371+K04498+K02183+K04498+K04498+K04498+K04498+K04371+K04371+K04371+K04371+K04498+K03083+K04371+K04498+K02183+K02183+K04498+K04498+K04498+K04498+K03083+K04498+K03083+K02183+K04371+K04371+K04371+K04498+K04498+K04498+K04368+K04368+K02183+K04371+K04498+K04498+K04498+K04498+K04371
Melanoma	17	Munro_Bamboo_unigene_BMK_10992;Munro_Bamboo_unigene_BMK_15796;Munro_Bamboo_unigene_BMK_17186;Munro_Bamboo_unigene_BMK_24620;Munro_Bamboo_unigene_BMK_25793;Munro_Bamboo_unigene_BMK_27108;Munro_Bamboo_unigene_BMK_27565;Munro_Bamboo_unigene_BMK_31491;Munro_Bamboo_unigene_BMK_34826;Munro_Bamboo_unigene_BMK_5118;Munro_Bamboo_unigene_BMK_5119;Munro_Bamboo_unigene_BMK_51698;Munro_Bamboo_unigene_BMK_5697…	K04371+K04368+K04371+K04371+K04371+K04371+K04371+K04371+K06620+K04371+K04371+K04371+K04368+K04368+K04371+K01110+K04371
Metabolism of xenobiotics by cytochrome P450	28	Munro_Bamboo_unigene_BMK_10065;Munro_Bamboo_unigene_BMK_10066;Munro_Bamboo_unigene_BMK_11066;Munro_Bamboo_unigene_BMK_11088;Munro_Bamboo_unigene_BMK_12218;Munro_Bamboo_unigene_BMK_14015;Munro_Bamboo_unigene_BMK_18958;Munro_Bamboo_unigene_BMK_1975;Munro_Bamboo_unigene_BMK_25705;Munro_Bamboo_unigene_BMK_27371;Munro_Bamboo_unigene_BMK_2859;Munro_Bamboo_unigene_BMK_33039;Munro_Bamboo_unigene_BMK_3365…	K00799+K00799+K00001+K00001+K00799+K00001+K00799+K00001+K00001+K00001+K00121+K00799+K00001+K00001+K00001+K00001+K00121+K00001+K00799+K00121+K00799+K00001+K00001+K00001+K00799+K00121+K00799+K00121
Methane metabolism	146	Munro_Bamboo_unigene_BMK_10753;Munro_Bamboo_unigene_BMK_11339;Munro_Bamboo_unigene_BMK_1205;Munro_Bamboo_unigene_BMK_12519;Munro_Bamboo_unigene_BMK_12647;Munro_Bamboo_unigene_BMK_13090;Munro_Bamboo_unigene_BMK_13289;Munro_Bamboo_unigene_BMK_13569;Munro_Bamboo_unigene_BMK_1359;Munro_Bamboo_unigene_BMK_13593;Munro_Bamboo_unigene_BMK_14317;Munro_Bamboo_unigene_BMK_15047;Munro_Bamboo_unigene_BMK_1510…	K11188+K00430+K03841+K01689+K01834+K01595+K01834+K00430+K00430+K01595+K00830+K01895+K00430+K01689+K00430+K00430+K00122+K00430+K00430+K01834+K00058+K03841+K00850+K03781+K00122+K03841+K00850+K01595+K01595+K00058+K01595+K00430+K00850+K00430+K00430+K00430+K00850+K00430+K00430+K03781+K00850+K01595+K01689+K01689+K00121+K01834+K00430+K00600+K00430+K00430+K01595+K01689+K01834+K03781+K00850+K00430+K00430+…
Mineral absorption	13	Munro_Bamboo_unigene_BMK_11132;Munro_Bamboo_unigene_BMK_14075;Munro_Bamboo_unigene_BMK_15740;Munro_Bamboo_unigene_BMK_16082;Munro_Bamboo_unigene_BMK_19664;Munro_Bamboo_unigene_BMK_23138;Munro_Bamboo_unigene_BMK_4357;Munro_Bamboo_unigene_BMK_47167;Munro_Bamboo_unigene_BMK_49828;Munro_Bamboo_unigene_BMK_53411;Munro_Bamboo_unigene_BMK_59519;Munro_Bamboo_unigene_BMK_60221;Munro_Bamboo_unigene_BMK_931…	K12347+K00522+K14686+K00522+K00522+K14686+K07213+K14685+K12347+K00510+K14686+K00522+K07213
Mismatch repair	62	Munro_Bamboo_unigene_BMK_10143;Munro_Bamboo_unigene_BMK_10144;Munro_Bamboo_unigene_BMK_10550;Munro_Bamboo_unigene_BMK_10776;Munro_Bamboo_unigene_BMK_1281;Munro_Bamboo_unigene_BMK_12838;Munro_Bamboo_unigene_BMK_13959;Munro_Bamboo_unigene_BMK_14282;Munro_Bamboo_unigene_BMK_15533;Munro_Bamboo_unigene_BMK_17851;Munro_Bamboo_unigene_BMK_1933;Munro_Bamboo_unigene_BMK_19501;Munro_Bamboo_unigene_BMK_1978…	K10754+K10754+K08734+K10739+K10858+K10755+K07466+K10747+K07466+K08734+K02327+K10739+K08737+K08736+K07466+K10739+K08737+K08735+K10754+K08735+K03504+K07466+K07456+K10739+K10755+K02327+K07466+K08737+K10756+K10746+K07466+K07466+K02328+K10747+K08736+K02328+K07466+K08737+K07466+K07456+K08736+K10739+K07466+K03111+K07466+K10755+K07456+K10756+K08737+K10739+K07466+K07466+K08737+K07456+K10755+K10858+K07466+…
N-Glycan biosynthesis	84	Munro_Bamboo_unigene_BMK_1018;Munro_Bamboo_unigene_BMK_10351;Munro_Bamboo_unigene_BMK_10721;Munro_Bamboo_unigene_BMK_11676;Munro_Bamboo_unigene_BMK_11995;Munro_Bamboo_unigene_BMK_12417;Munro_Bamboo_unigene_BMK_13040;Munro_Bamboo_unigene_BMK_1420;Munro_Bamboo_unigene_BMK_1421;Munro_Bamboo_unigene_BMK_1432;Munro_Bamboo_unigene_BMK_14441;Munro_Bamboo_unigene_BMK_15417;Munro_Bamboo_unigene_BMK_15819;…	K03847+K00902+K03848+K03846+K03843+K00726+K03844+K01230+K01230+K01228+K01230+K01230+K06316+K09658+K05546+K00721+K12668+K01230+K05546+K07432+K01231+K01228+K07151+K03850+K01001+K01001+K07252+K07151+K05546+K05546+K01228+K03844+K01231+K07441+K03847+K09658+K06316+K00737+K03845+K07432+K07252+K06316+K12666+K05546+K09658+K07151+K09659+K03842+K01230+K03848+K03849+K00736+K00737+K07151+K01231+K00729+K07151+…
NOD-like receptor signaling pathway	27	Munro_Bamboo_unigene_BMK_10992;Munro_Bamboo_unigene_BMK_16865;Munro_Bamboo_unigene_BMK_17186;Munro_Bamboo_unigene_BMK_230;Munro_Bamboo_unigene_BMK_24620;Munro_Bamboo_unigene_BMK_25793;Munro_Bamboo_unigene_BMK_27108;Munro_Bamboo_unigene_BMK_27565;Munro_Bamboo_unigene_BMK_2785;Munro_Bamboo_unigene_BMK_28328;Munro_Bamboo_unigene_BMK_30115;Munro_Bamboo_unigene_BMK_31491;Munro_Bamboo_unigene_BMK_32769…	K04371+K12795+K04371+K04079+K04371+K04371+K04371+K04371+K04079+K12795+K12795+K04371+K04079+K04079+K04079+K09487+K04079+K04079+K04079+K04371+K04371+K04371+K04079+K04371+K04079+K04079+K04371
Naphthalene degradation	20	Munro_Bamboo_unigene_BMK_11066;Munro_Bamboo_unigene_BMK_11088;Munro_Bamboo_unigene_BMK_12312;Munro_Bamboo_unigene_BMK_14015;Munro_Bamboo_unigene_BMK_1975;Munro_Bamboo_unigene_BMK_25705;Munro_Bamboo_unigene_BMK_27371;Munro_Bamboo_unigene_BMK_2859;Munro_Bamboo_unigene_BMK_33650;Munro_Bamboo_unigene_BMK_36046;Munro_Bamboo_unigene_BMK_36587;Munro_Bamboo_unigene_BMK_36795;Munro_Bamboo_unigene_BMK_3685…	K00001+K00001+K00120+K00001+K00001+K00001+K00001+K00121+K00001+K00001+K00001+K00001+K00121+K00001+K00121+K00001+K00001+K00001+K00121+K00121
Natural killer cell mediated cytotoxicity	47	Munro_Bamboo_unigene_BMK_10992;Munro_Bamboo_unigene_BMK_12381;Munro_Bamboo_unigene_BMK_12388;Munro_Bamboo_unigene_BMK_15446;Munro_Bamboo_unigene_BMK_15508;Munro_Bamboo_unigene_BMK_15796;Munro_Bamboo_unigene_BMK_17186;Munro_Bamboo_unigene_BMK_18311;Munro_Bamboo_unigene_BMK_19398;Munro_Bamboo_unigene_BMK_20285;Munro_Bamboo_unigene_BMK_21706;Munro_Bamboo_unigene_BMK_24620;Munro_Bamboo_unigene_BMK_24…	K04371+K04392+K06268+K04392+K04392+K04368+K04371+K04392+K06268+K04392+K04392+K04371+K04392+K04392+K04371+K04392+K04392+K04392+K04371+K04392+K04371+K04392+K06268+K04392+K04371+K06268+K06268+K04392+K06268+K04392+K04392+K04371+K04371+K04371+K04392+K04368+K04368+K06268+K06268+K04371+K04392+K06268+K06268+K04392+K06268+K04392+K04371
Neuroactive ligand-receptor interaction	13	Munro_Bamboo_unigene_BMK_13702;Munro_Bamboo_unigene_BMK_18503;Munro_Bamboo_unigene_BMK_30358;Munro_Bamboo_unigene_BMK_34609;Munro_Bamboo_unigene_BMK_3827;Munro_Bamboo_unigene_BMK_3828;Munro_Bamboo_unigene_BMK_3829;Munro_Bamboo_unigene_BMK_3830;Munro_Bamboo_unigene_BMK_3831;Munro_Bamboo_unigene_BMK_3832;Munro_Bamboo_unigene_BMK_3833;Munro_Bamboo_unigene_BMK_3834;Munro_Bamboo_unigene_BMK_53830;	K05236+K05236+K05236+K05236+K05236+K05236+K05236+K05236+K05236+K05236+K05236+K05236+K05236
Neurotrophin signaling pathway	51	Munro_Bamboo_unigene_BMK_10992;Munro_Bamboo_unigene_BMK_12381;Munro_Bamboo_unigene_BMK_15446;Munro_Bamboo_unigene_BMK_15508;Munro_Bamboo_unigene_BMK_15796;Munro_Bamboo_unigene_BMK_17186;Munro_Bamboo_unigene_BMK_18311;Munro_Bamboo_unigene_BMK_18672;Munro_Bamboo_unigene_BMK_20285;Munro_Bamboo_unigene_BMK_21706;Munro_Bamboo_unigene_BMK_24620;Munro_Bamboo_unigene_BMK_24621;Munro_Bamboo_unigene_BMK_24…	K04371+K04392+K04392+K04392+K04368+K04371+K04392+K02183+K04392+K04392+K04371+K04392+K04392+K04371+K04392+K04392+K04392+K04371+K04392+K04371+K04392+K04392+K03083+K04371+K06630+K06630+K04392+K02183+K02183+K06630+K04392+K04505+K03083+K04392+K03083+K02183+K04371+K04371+K04371+K06630+K04392+K04368+K04368+K02183+K04505+K04371+K04392+K04392+K04392+K04733+K04371
Nicotinate and nicotinamide metabolism	25	Munro_Bamboo_unigene_BMK_11814;Munro_Bamboo_unigene_BMK_1300;Munro_Bamboo_unigene_BMK_13802;Munro_Bamboo_unigene_BMK_13935;Munro_Bamboo_unigene_BMK_16243;Munro_Bamboo_unigene_BMK_22524;Munro_Bamboo_unigene_BMK_24861;Munro_Bamboo_unigene_BMK_25272;Munro_Bamboo_unigene_BMK_32478;Munro_Bamboo_unigene_BMK_34925;Munro_Bamboo_unigene_BMK_37818;Munro_Bamboo_unigene_BMK_38633;Munro_Bamboo_unigene_BMK_412…	K03787+K00858+K00763+K03426+K00763+K00763+K03517+K03787+K03517+K06210+K00858+K00278+K03517+K00763+K00763+K03787+K00767+K03426+K00858+K03517+K00278+K01950+K00278+K00763+K00763
Nitrogen metabolism	73	Munro_Bamboo_unigene_BMK_10104;Munro_Bamboo_unigene_BMK_11240;Munro_Bamboo_unigene_BMK_12323;Munro_Bamboo_unigene_BMK_1260;Munro_Bamboo_unigene_BMK_12771;Munro_Bamboo_unigene_BMK_12885;Munro_Bamboo_unigene_BMK_13066;Munro_Bamboo_unigene_BMK_1438;Munro_Bamboo_unigene_BMK_14391;Munro_Bamboo_unigene_BMK_14524;Munro_Bamboo_unigene_BMK_15658;Munro_Bamboo_unigene_BMK_17690;Munro_Bamboo_unigene_BMK_1852…	K01455+K00261+K01915+K01915+K00264+K10775+K01673+K00262+K00284+K00264+K01674+K00605+K01953+K13064+K00360+K10775+K00261+K00360+K01915+K10775+K00264+K10775+K01760+K01501+K00264+K00284+K13064+K00264+K01673+K00262+K01501+K00264+K01915+K00262+K00360+K01953+K01953+K01673+K00261+K13064+K01725+K10775+K13064+K13064+K00284+K00360+K01953+K01501+K10775+K00264+K00264+K01760+K00284+K01673+K10775+K00262+K00360+…
Non-homologous end-joining	23	Munro_Bamboo_unigene_BMK_10419;Munro_Bamboo_unigene_BMK_16603;Munro_Bamboo_unigene_BMK_20465;Munro_Bamboo_unigene_BMK_20582;Munro_Bamboo_unigene_BMK_22687;Munro_Bamboo_unigene_BMK_28905;Munro_Bamboo_unigene_BMK_29355;Munro_Bamboo_unigene_BMK_29789;Munro_Bamboo_unigene_BMK_30075;Munro_Bamboo_unigene_BMK_34637;Munro_Bamboo_unigene_BMK_42277;Munro_Bamboo_unigene_BMK_43324;Munro_Bamboo_unigene_BMK_44…	K10865+K10884+K10866+K10886+K10865+K10777+K10865+K10866+K03512+K10866+K10865+K10865+K10777+K10884+K10885+K03512+K10866+K10884+K10866+K03512+K10777+K04799+K04799
Non-small cell lung cancer	21	Munro_Bamboo_unigene_BMK_10992;Munro_Bamboo_unigene_BMK_15653;Munro_Bamboo_unigene_BMK_15796;Munro_Bamboo_unigene_BMK_17186;Munro_Bamboo_unigene_BMK_24620;Munro_Bamboo_unigene_BMK_25793;Munro_Bamboo_unigene_BMK_25873;Munro_Bamboo_unigene_BMK_27108;Munro_Bamboo_unigene_BMK_27565;Munro_Bamboo_unigene_BMK_31491;Munro_Bamboo_unigene_BMK_34826;Munro_Bamboo_unigene_BMK_35257;Munro_Bamboo_unigene_BMK_51…	K04371+K01522+K04368+K04371+K04371+K04371+K06276+K04371+K04371+K04371+K06620+K06276+K04371+K04371+K04371+K04368+K04368+K04371+K01522+K06276+K04371
Notch signaling pathway	43	Munro_Bamboo_unigene_BMK_11209;Munro_Bamboo_unigene_BMK_1133;Munro_Bamboo_unigene_BMK_1134;Munro_Bamboo_unigene_BMK_1147;Munro_Bamboo_unigene_BMK_14854;Munro_Bamboo_unigene_BMK_1792;Munro_Bamboo_unigene_BMK_19223;Munro_Bamboo_unigene_BMK_19954;Munro_Bamboo_unigene_BMK_20580;Munro_Bamboo_unigene_BMK_23440;Munro_Bamboo_unigene_BMK_23879;Munro_Bamboo_unigene_BMK_24585;Munro_Bamboo_unigene_BMK_25218;…	K06067+K06067+K06067+K06067+K04498+K04498+K04498+K04498+K06067+K06067+K04498+K04498+K06067+K06066+K06171+K06063+K04498+K04498+K06067+K04498+K04498+K04498+K04498+K06067+K04505+K06171+K06066+K06067+K04498+K06063+K06066+K04498+K04498+K04498+K04505+K06063+K06067+K06170+K04498+K04498+K04498+K04498+K06063
Novobiocin biosynthesis	10	Munro_Bamboo_unigene_BMK_10820;Munro_Bamboo_unigene_BMK_21019;Munro_Bamboo_unigene_BMK_21772;Munro_Bamboo_unigene_BMK_22675;Munro_Bamboo_unigene_BMK_30293;Munro_Bamboo_unigene_BMK_40569;Munro_Bamboo_unigene_BMK_47698;Munro_Bamboo_unigene_BMK_52140;Munro_Bamboo_unigene_BMK_60370;Munro_Bamboo_unigene_BMK_780;	K00815+K00813+K00817+K00815+K00817+K00813+K00815+K00815+K00813+K00815
Nucleotide excision repair	129	Munro_Bamboo_unigene_BMK_10096;Munro_Bamboo_unigene_BMK_10097;Munro_Bamboo_unigene_BMK_10143;Munro_Bamboo_unigene_BMK_10144;Munro_Bamboo_unigene_BMK_10776;Munro_Bamboo_unigene_BMK_1114;Munro_Bamboo_unigene_BMK_11255;Munro_Bamboo_unigene_BMK_11256;Munro_Bamboo_unigene_BMK_11405;Munro_Bamboo_unigene_BMK_12081;Munro_Bamboo_unigene_BMK_12247;Munro_Bamboo_unigene_BMK_12507;Munro_Bamboo_unigene_BMK_127…	K10839+K10839+K10754+K10754+K10739+K03143+K10609+K10609+K02202+K02325+K03144+K10844+K10843+K10755+K10609+K07466+K10747+K10846+K03143+K10845+K10844+K10839+K07466+K10841+K10610+K10846+K10610+K02327+K10739+K03141+K10838+K02324+K10846+K02335+K07466+K10739+K10849+K10754+K10609+K02324+K03504+K07466+K03143+K10846+K02324+K10610+K10739+K10846+K10755+K02327+K06634+K07466+K10848+K10756+K10846+K10848+K10844+…
Olfactory transduction	5	Munro_Bamboo_unigene_BMK_18672;Munro_Bamboo_unigene_BMK_3671;Munro_Bamboo_unigene_BMK_3673;Munro_Bamboo_unigene_BMK_50043;Munro_Bamboo_unigene_BMK_58481;	K02183+K02183+K02183+K02183+K02183
One carbon pool by folate	26	Munro_Bamboo_unigene_BMK_10171;Munro_Bamboo_unigene_BMK_1561;Munro_Bamboo_unigene_BMK_1562;Munro_Bamboo_unigene_BMK_16135;Munro_Bamboo_unigene_BMK_17690;Munro_Bamboo_unigene_BMK_20038;Munro_Bamboo_unigene_BMK_21604;Munro_Bamboo_unigene_BMK_27951;Munro_Bamboo_unigene_BMK_28286;Munro_Bamboo_unigene_BMK_29022;Munro_Bamboo_unigene_BMK_30649;Munro_Bamboo_unigene_BMK_3526;Munro_Bamboo_unigene_BMK_36550…	K00601+K00602+K00602+K13998+K00605+K01934+K00602+K13998+K00604+K00600+K00604+K00297+K00601+K00600+K01433+K00602+K01934+K00600+K01934+K00600+K00600+K00600+K00601+K00602+K00600+K13998
Oocyte meiosis	151	Munro_Bamboo_unigene_BMK_10236;Munro_Bamboo_unigene_BMK_10992;Munro_Bamboo_unigene_BMK_11693;Munro_Bamboo_unigene_BMK_1173;Munro_Bamboo_unigene_BMK_11800;Munro_Bamboo_unigene_BMK_12388;Munro_Bamboo_unigene_BMK_13361;Munro_Bamboo_unigene_BMK_13776;Munro_Bamboo_unigene_BMK_15147;Munro_Bamboo_unigene_BMK_15664;Munro_Bamboo_unigene_BMK_15796;Munro_Bamboo_unigene_BMK_1622;Munro_Bamboo_unigene_BMK_1662…	K03349+K04371+K04382+K11584+K11584+K06268+K03348+K03348+K11584+K02365+K04368+K03354+K13728+K03094+K02537+K04371+K03357+K02183+K06268+K06669+K03351+K03456+K04382+K03348+K06636+K03347+K04371+K02178+K11584+K04371+K03352+K03094+K04382+K04371+K02178+K02178+K03363+K04371+K06268+K03355+K06269+K03347+K11584+K03456+K03350+K04382+K04371+K03352+K03094+K03094+K03094+K03351+K03868+K03456+K06268+K03456+K06269+…
Osteoclast differentiation	36	Munro_Bamboo_unigene_BMK_10992;Munro_Bamboo_unigene_BMK_12381;Munro_Bamboo_unigene_BMK_15446;Munro_Bamboo_unigene_BMK_15508;Munro_Bamboo_unigene_BMK_15796;Munro_Bamboo_unigene_BMK_17186;Munro_Bamboo_unigene_BMK_18311;Munro_Bamboo_unigene_BMK_20285;Munro_Bamboo_unigene_BMK_21706;Munro_Bamboo_unigene_BMK_24620;Munro_Bamboo_unigene_BMK_24621;Munro_Bamboo_unigene_BMK_24961;Munro_Bamboo_unigene_BMK_25…	K04371+K04392+K04392+K04392+K04368+K04371+K04392+K04392+K04392+K04371+K04392+K04392+K04371+K04392+K04392+K04392+K04371+K04392+K04371+K04392+K04392+K04371+K04392+K04392+K04392+K04371+K04371+K04371+K04392+K04368+K04368+K04371+K04392+K04392+K04392+K04371
Other glycan degradation	23	Munro_Bamboo_unigene_BMK_12322;Munro_Bamboo_unigene_BMK_18877;Munro_Bamboo_unigene_BMK_21773;Munro_Bamboo_unigene_BMK_25081;Munro_Bamboo_unigene_BMK_25323;Munro_Bamboo_unigene_BMK_25411;Munro_Bamboo_unigene_BMK_32282;Munro_Bamboo_unigene_BMK_38071;Munro_Bamboo_unigene_BMK_39764;Munro_Bamboo_unigene_BMK_40149;Munro_Bamboo_unigene_BMK_40381;Munro_Bamboo_unigene_BMK_43630;Munro_Bamboo_unigene_BMK_46…	K01191+K12373+K01191+K01227+K12309+K12373+K01227+K01191+K12309+K12373+K12373+K12373+K12373+K01227+K12373+K01227+K12373+K12373+K01190+K12309+K01227+K01444+K01190
Other types of O-glycan biosynthesis	14	Munro_Bamboo_unigene_BMK_11130;Munro_Bamboo_unigene_BMK_11237;Munro_Bamboo_unigene_BMK_11238;Munro_Bamboo_unigene_BMK_17143;Munro_Bamboo_unigene_BMK_23866;Munro_Bamboo_unigene_BMK_34335;Munro_Bamboo_unigene_BMK_37838;Munro_Bamboo_unigene_BMK_50624;Munro_Bamboo_unigene_BMK_55595;Munro_Bamboo_unigene_BMK_60677;Munro_Bamboo_unigene_BMK_63375;Munro_Bamboo_unigene_BMK_66059;Munro_Bamboo_unigene_BMK_66…	K03691+K09667+K09667+K09667+K09667+K09667+K09667+K09667+K09667+K09667+K09667+K09667+K09667+K03691
Oxidative phosphorylation	204	Munro_Bamboo_unigene_BMK_10210;Munro_Bamboo_unigene_BMK_10211;Munro_Bamboo_unigene_BMK_10447;Munro_Bamboo_unigene_BMK_10662;Munro_Bamboo_unigene_BMK_10869;Munro_Bamboo_unigene_BMK_10871;Munro_Bamboo_unigene_BMK_11738;Munro_Bamboo_unigene_BMK_11963;Munro_Bamboo_unigene_BMK_11968;Munro_Bamboo_unigene_BMK_11969;Munro_Bamboo_unigene_BMK_12091;Munro_Bamboo_unigene_BMK_12424;Munro_Bamboo_unigene_BMK_12…	K00413+K00413+K01507+K01507+K02150+K02150+K02140+K03942+K02138+K02138+K03955+K01507+K02267+K02267+K02113+K02126+K03885+K05579+K01507+K01507+K02147+K03941+K03885+K03941+K02133+K03885+K00419+K01507+K03955+K05577+K01535+K01507+K02140+K02150+K02259+K02152+K02256+K03880+K01507+K03943+K01535+K02155+K02267+K05573+K01507+K02147+K03885+K03937+K01507+K03946+K01535+K02155+K02154+K02265+K02133+K02151+K03963+…
PPAR signaling pathway	56	Munro_Bamboo_unigene_BMK_13030;Munro_Bamboo_unigene_BMK_14130;Munro_Bamboo_unigene_BMK_14519;Munro_Bamboo_unigene_BMK_15404;Munro_Bamboo_unigene_BMK_16122;Munro_Bamboo_unigene_BMK_17361;Munro_Bamboo_unigene_BMK_18406;Munro_Bamboo_unigene_BMK_18751;Munro_Bamboo_unigene_BMK_19561;Munro_Bamboo_unigene_BMK_21434;Munro_Bamboo_unigene_BMK_22037;Munro_Bamboo_unigene_BMK_22458;Munro_Bamboo_unigene_BMK_23…	K00507+K00232+K08762+K00864+K00232+K01897+K00249+K08770+K00232+K00249+K00864+K00249+K08770+K01897+K06276+K01897+K01897+K08770+K00232+K00232+K00232+K06276+K08770+K01897+K01897+K01897+K00507+K01897+K00232+K01897+K07513+K08770+K00232+K01897+K08770+K07513+K00249+K00232+K00864+K01897+K00507+K00249+K00864+K00507+K00232+K01897+K01897+K00232+K01897+K07513+K01897+K01897+K08770+K00232+K08764+K06276
Pancreatic cancer	41	Munro_Bamboo_unigene_BMK_1027;Munro_Bamboo_unigene_BMK_1028;Munro_Bamboo_unigene_BMK_10992;Munro_Bamboo_unigene_BMK_12381;Munro_Bamboo_unigene_BMK_15446;Munro_Bamboo_unigene_BMK_15508;Munro_Bamboo_unigene_BMK_15796;Munro_Bamboo_unigene_BMK_17186;Munro_Bamboo_unigene_BMK_18311;Munro_Bamboo_unigene_BMK_18526;Munro_Bamboo_unigene_BMK_20285;Munro_Bamboo_unigene_BMK_21706;Munro_Bamboo_unigene_BMK_2462…	K04482+K04482+K04371+K04392+K04392+K04392+K04368+K04371+K04392+K04482+K04392+K04392+K04371+K04392+K04392+K04371+K04482+K04392+K04392+K04392+K04371+K04392+K04371+K04392+K04392+K04371+K06620+K04392+K04392+K04392+K04371+K04371+K04371+K04392+K04368+K04368+K04371+K04392+K04392+K04392+K04371
Pancreatic secretion	35	Munro_Bamboo_unigene_BMK_10977;Munro_Bamboo_unigene_BMK_12381;Munro_Bamboo_unigene_BMK_15446;Munro_Bamboo_unigene_BMK_15508;Munro_Bamboo_unigene_BMK_18311;Munro_Bamboo_unigene_BMK_19677;Munro_Bamboo_unigene_BMK_20285;Munro_Bamboo_unigene_BMK_2129;Munro_Bamboo_unigene_BMK_21706;Munro_Bamboo_unigene_BMK_21953;Munro_Bamboo_unigene_BMK_24621;Munro_Bamboo_unigene_BMK_24961;Munro_Bamboo_unigene_BMK_258…	K07901+K04392+K04392+K04392+K04392+K07901+K04392+K05853+K04392+K01047+K04392+K04392+K01047+K04392+K04392+K04392+K04392+K04392+K07901+K07901+K01047+K04392+K07901+K05853+K07901+K04392+K04392+K04392+K04392+K01047+K01047+K04392+K01047+K04392+K04392
Pantothenate and CoA biosynthesis	39	Munro_Bamboo_unigene_BMK_1045;Munro_Bamboo_unigene_BMK_1444;Munro_Bamboo_unigene_BMK_1597;Munro_Bamboo_unigene_BMK_18875;Munro_Bamboo_unigene_BMK_20771;Munro_Bamboo_unigene_BMK_21751;Munro_Bamboo_unigene_BMK_23367;Munro_Bamboo_unigene_BMK_23664;Munro_Bamboo_unigene_BMK_24716;Munro_Bamboo_unigene_BMK_25086;Munro_Bamboo_unigene_BMK_25607;Munro_Bamboo_unigene_BMK_27219;Munro_Bamboo_unigene_BMK_27542…	K01431+K00826+K00859+K09680+K00826+K00053+K00053+K00826+K00826+K00826+K00826+K00207+K02318+K00859+K01652+K01431+K00826+K01652+K00859+K00826+K00826+K00826+K00053+K01653+K09680+K01598+K01922+K01464+K01464+K00859+K01464+K00826+K01687+K00053+K00826+K01918+K00606+K00826+K00826
Parkinson's disease	134	Munro_Bamboo_unigene_BMK_10210;Munro_Bamboo_unigene_BMK_10211;Munro_Bamboo_unigene_BMK_11645;Munro_Bamboo_unigene_BMK_11646;Munro_Bamboo_unigene_BMK_11963;Munro_Bamboo_unigene_BMK_11968;Munro_Bamboo_unigene_BMK_11969;Munro_Bamboo_unigene_BMK_12091;Munro_Bamboo_unigene_BMK_12510;Munro_Bamboo_unigene_BMK_12511;Munro_Bamboo_unigene_BMK_12833;Munro_Bamboo_unigene_BMK_13976;Munro_Bamboo_unigene_BMK_14…	K00413+K00413+K05864+K05864+K03942+K02138+K02138+K03955+K02267+K02267+K03178+K02126+K05863+K03941+K03178+K03941+K02133+K00419+K04554+K03955+K05864+K03178+K04554+K02256+K03880+K10578+K03943+K02267+K05863+K03178+K03937+K03946+K02265+K03178+K02133+K03963+K03963+K10575+K05862+K03178+K03965+K05862+K03938+K03938+K03945+K02128+K00411+K02138+K03945+K02266+K03178+K05863+K00411+K02128+K05863+K02136+K05863+…
Pathogenic Escherichia coli infection	44	Munro_Bamboo_unigene_BMK_10376;Munro_Bamboo_unigene_BMK_11103;Munro_Bamboo_unigene_BMK_12485;Munro_Bamboo_unigene_BMK_12486;Munro_Bamboo_unigene_BMK_12712;Munro_Bamboo_unigene_BMK_15264;Munro_Bamboo_unigene_BMK_18921;Munro_Bamboo_unigene_BMK_21045;Munro_Bamboo_unigene_BMK_2587;Munro_Bamboo_unigene_BMK_27675;Munro_Bamboo_unigene_BMK_28759;Munro_Bamboo_unigene_BMK_30800;Munro_Bamboo_unigene_BMK_322…	K05747+K05755+K05758+K05758+K05747+K05747+K05758+K05758+K05757+K07375+K07374+K07375+K07374+K07375+K11294+K11294+K07375+K07375+K07375+K07375+K07375+K07374+K07374+K05747+K07375+K07375+K07375+K07375+K07375+K07375+K07375+K05758+K07375+K05756+K05758+K07375+K05757+K05754+K07375+K07374+K05758+K05747+K05692+K05757
Pathways in cancer	139	Munro_Bamboo_unigene_BMK_10041;Munro_Bamboo_unigene_BMK_10042;Munro_Bamboo_unigene_BMK_10043;Munro_Bamboo_unigene_BMK_1027;Munro_Bamboo_unigene_BMK_1028;Munro_Bamboo_unigene_BMK_10550;Munro_Bamboo_unigene_BMK_10992;Munro_Bamboo_unigene_BMK_11209;Munro_Bamboo_unigene_BMK_1133;Munro_Bamboo_unigene_BMK_1134;Munro_Bamboo_unigene_BMK_1147;Munro_Bamboo_unigene_BMK_12381;Munro_Bamboo_unigene_BMK_13872;M…	K01679+K01679+K01679+K04482+K04482+K08734+K04371+K06067+K06067+K06067+K06067+K04392+K07203+K04498+K04392+K04392+K04368+K04371+K08734+K04498+K04392+K04482+K04498+K08737+K04498+K04392+K06067+K04392+K01679+K08736+K04079+K06067+K08737+K04498+K08735+K04498+K04371+K04392+K08735+K06228+K04392+K06067+K04371+K04482+K04392+K04392+K04392+K01679+K04371+K04392+K04371+K04392+K04079+K04392+K04498+K06228+K08737+…
Pentose and glucuronate interconversions	47	Munro_Bamboo_unigene_BMK_10484;Munro_Bamboo_unigene_BMK_11032;Munro_Bamboo_unigene_BMK_12377;Munro_Bamboo_unigene_BMK_12446;Munro_Bamboo_unigene_BMK_13176;Munro_Bamboo_unigene_BMK_1452;Munro_Bamboo_unigene_BMK_17641;Munro_Bamboo_unigene_BMK_19859;Munro_Bamboo_unigene_BMK_20477;Munro_Bamboo_unigene_BMK_21268;Munro_Bamboo_unigene_BMK_22042;Munro_Bamboo_unigene_BMK_23079;Munro_Bamboo_unigene_BMK_253…	K00963+K00128+K00128+K00963+K00128+K01051+K00128+K00012+K00963+K01051+K01783+K01051+K01728+K00128+K01051+K01783+K01783+K01051+K01051+K01728+K01051+K01051+K00128+K00963+K01783+K01805+K01783+K01728+K01051+K01805+K00963+K00854+K01051+K00012+K01051+K01184+K01051+K01728+K01783+K01783+K00128+K00128+K00128+K01051+K00128+K00128+K01051
Pentose phosphate pathway	94	Munro_Bamboo_unigene_BMK_10810;Munro_Bamboo_unigene_BMK_1205;Munro_Bamboo_unigene_BMK_12343;Munro_Bamboo_unigene_BMK_12348;Munro_Bamboo_unigene_BMK_12349;Munro_Bamboo_unigene_BMK_12630;Munro_Bamboo_unigene_BMK_14009;Munro_Bamboo_unigene_BMK_15536;Munro_Bamboo_unigene_BMK_15610;Munro_Bamboo_unigene_BMK_18762;Munro_Bamboo_unigene_BMK_18801;Munro_Bamboo_unigene_BMK_19450;Munro_Bamboo_unigene_BMK_197…	K00948+K03841+K00033+K01810+K01810+K00036+K00033+K00036+K01623+K00033+K01623+K01057+K00948+K03841+K00850+K01810+K01810+K03841+K00850+K01783+K00850+K01807+K00850+K01623+K01810+K00850+K01623+K00036+K01810+K01623+K00850+K01783+K01783+K00852+K00616+K00036+K00850+K01623+K01835+K01057+K00948+K01810+K01783+K01057+K00850+K00850+K00616+K01623+K01623+K01623+K00036+K00616+K01783+K00851+K03841+K00036+K00850+…
Peptidases	409	Munro_Bamboo_unigene_BMK_10044;Munro_Bamboo_unigene_BMK_10045;Munro_Bamboo_unigene_BMK_10087;Munro_Bamboo_unigene_BMK_10220;Munro_Bamboo_unigene_BMK_10225;Munro_Bamboo_unigene_BMK_10273;Munro_Bamboo_unigene_BMK_10370;Munro_Bamboo_unigene_BMK_10693;Munro_Bamboo_unigene_BMK_10720;Munro_Bamboo_unigene_BMK_10905;Munro_Bamboo_unigene_BMK_10906;Munro_Bamboo_unigene_BMK_11063;Munro_Bamboo_unigene_BMK_11…	K01414+K01414+K01338+K01408+K05610+K01262+K01303+K09646+K11851+K05610+K05610+K11866+K11838+K08592+K11836+K11836+K11836+K11855+K11855+K11855+K08245+K11838+K13719+K06013+K06013+K01280+K08245+K08245+K11835+K14664+K09645+K08245+K08675+K01412+K01366+K09648+K11835+K11844+K11855+K09646+K11835+K11835+K01358+K08675+K14664+K08245+K02365+K01267+K00764+K03798+K01303+K01265+K01265+K01265+K02737+K00681+K09646+…
Peptidoglycan biosynthesis	4	Munro_Bamboo_unigene_BMK_26190;Munro_Bamboo_unigene_BMK_40746;Munro_Bamboo_unigene_BMK_62196;Munro_Bamboo_unigene_BMK_7212;	K02563+K01000+K01000+K01000
Peroxisome	132	Munro_Bamboo_unigene_BMK_10507;Munro_Bamboo_unigene_BMK_1056;Munro_Bamboo_unigene_BMK_11285;Munro_Bamboo_unigene_BMK_11286;Munro_Bamboo_unigene_BMK_11287;Munro_Bamboo_unigene_BMK_11288;Munro_Bamboo_unigene_BMK_12365;Munro_Bamboo_unigene_BMK_12498;Munro_Bamboo_unigene_BMK_12499;Munro_Bamboo_unigene_BMK_13935;Munro_Bamboo_unigene_BMK_14022;Munro_Bamboo_unigene_BMK_14130;Munro_Bamboo_unigene_BMK_143…	K06664+K13336+K13343+K13343+K13343+K13343+K04565+K04565+K04565+K03426+K00869+K00232+K00830+K04565+K11517+K13348+K00232+K13338+K01897+K13338+K00106+K00232+K03781+K12261+K01578+K04564+K13338+K13338+K01640+K11517+K01897+K12261+K13338+K11517+K01897+K11517+K01897+K03781+K11517+K13339+K00031+K00106+K11517+K03781+K11517+K00232+K00232+K11517+K11517+K00232+K11517+K11517+K11517+K13341+K00869+K01897+K01897+…
Phagosome	154	Munro_Bamboo_unigene_BMK_104;Munro_Bamboo_unigene_BMK_105;Munro_Bamboo_unigene_BMK_10869;Munro_Bamboo_unigene_BMK_10871;Munro_Bamboo_unigene_BMK_11802;Munro_Bamboo_unigene_BMK_12381;Munro_Bamboo_unigene_BMK_13178;Munro_Bamboo_unigene_BMK_1370;Munro_Bamboo_unigene_BMK_14778;Munro_Bamboo_unigene_BMK_15446;Munro_Bamboo_unigene_BMK_15508;Munro_Bamboo_unigene_BMK_15608;Munro_Bamboo_unigene_BMK_17541;M…	K08054+K08054+K02150+K02150+K08488+K04392+K07342+K07887+K10956+K04392+K04392+K02147+K08057+K04392+K04392+K02150+K08054+K04392+K02152+K04392+K02155+K04392+K02147+K07897+K04392+K04392+K04392+K04392+K02155+K07375+K04392+K02154+K07374+K02151+K04392+K02148+K02154+K02155+K02155+K02155+K02155+K02155+K02155+K02155+K02155+K02155+K07897+K07342+K02148+K07375+K02154+K02150+K07374+K07887+K08488+K02150+K07375+…
Phenylalanine metabolism	87	Munro_Bamboo_unigene_BMK_10169;Munro_Bamboo_unigene_BMK_10753;Munro_Bamboo_unigene_BMK_10820;Munro_Bamboo_unigene_BMK_10998;Munro_Bamboo_unigene_BMK_11339;Munro_Bamboo_unigene_BMK_11986;Munro_Bamboo_unigene_BMK_12456;Munro_Bamboo_unigene_BMK_12885;Munro_Bamboo_unigene_BMK_13569;Munro_Bamboo_unigene_BMK_1359;Munro_Bamboo_unigene_BMK_15106;Munro_Bamboo_unigene_BMK_15870;Munro_Bamboo_unigene_BMK_163…	K14455+K11188+K00815+K00457+K00430+K01904+K00276+K10775+K00430+K00430+K00430+K00430+K01904+K00430+K00430+K00430+K13064+K10775+K00813+K00817+K00815+K00430+K10775+K00430+K00430+K10775+K00430+K00487+K01904+K00430+K00430+K01904+K13064+K00430+K01904+K09754+K00588+K01904+K00430+K00430+K00817+K09754+K00430+K00430+K00430+K01904+K00430+K00430+K00487+K13064+K00430+K00430+K10775+K13064+K13064+K00813+K00487+…
Phenylalanine, tyrosine and tryptophan biosynthesis	69	Munro_Bamboo_unigene_BMK_10169;Munro_Bamboo_unigene_BMK_10820;Munro_Bamboo_unigene_BMK_11491;Munro_Bamboo_unigene_BMK_12973;Munro_Bamboo_unigene_BMK_13607;Munro_Bamboo_unigene_BMK_14831;Munro_Bamboo_unigene_BMK_15331;Munro_Bamboo_unigene_BMK_17811;Munro_Bamboo_unigene_BMK_17846;Munro_Bamboo_unigene_BMK_207;Munro_Bamboo_unigene_BMK_208;Munro_Bamboo_unigene_BMK_21019;Munro_Bamboo_unigene_BMK_21772;…	K14455+K00815+K13832+K01626+K01735+K01850+K00766+K01817+K13832+K01736+K01736+K00813+K00817+K00815+K00891+K01736+K01658+K01609+K00891+K00766+K00817+K01626+K01626+K01626+K00800+K00800+K01658+K13832+K01850+K01657+K01850+K01657+K01609+K00891+K01850+K00891+K00813+K06001+K01658+K13832+K01609+K01817+K00815+K00891+K01735+K01695+K01695+K00766+K00815+K00766+K01735+K01695+K01658+K01695+K00813+K01626+K01850+…
Phenylpropanoid biosynthesis	125	Munro_Bamboo_unigene_BMK_10753;Munro_Bamboo_unigene_BMK_11339;Munro_Bamboo_unigene_BMK_11371;Munro_Bamboo_unigene_BMK_11986;Munro_Bamboo_unigene_BMK_12660;Munro_Bamboo_unigene_BMK_12885;Munro_Bamboo_unigene_BMK_13569;Munro_Bamboo_unigene_BMK_1359;Munro_Bamboo_unigene_BMK_13600;Munro_Bamboo_unigene_BMK_15106;Munro_Bamboo_unigene_BMK_15690;Munro_Bamboo_unigene_BMK_15870;Munro_Bamboo_unigene_BMK_163…	K11188+K00430+K05350+K01904+K00083+K10775+K00430+K00430+K01188+K00430+K12355+K00430+K01904+K00430+K00430+K00430+K13064+K09755+K10775+K05350+K01188+K01188+K00430+K10775+K00430+K00430+K10775+K09753+K00430+K00487+K12355+K01904+K00430+K13065+K00430+K09753+K13065+K01904+K13064+K00430+K01904+K09754+K00588+K01904+K00430+K00430+K09754+K00430+K00430+K09753+K13065+K12355+K01188+K00083+K00430+K01904+K01188+…
Phosphatidylinositol signaling system	80	Munro_Bamboo_unigene_BMK_1121;Munro_Bamboo_unigene_BMK_1122;Munro_Bamboo_unigene_BMK_11681;Munro_Bamboo_unigene_BMK_11771;Munro_Bamboo_unigene_BMK_11772;Munro_Bamboo_unigene_BMK_11773;Munro_Bamboo_unigene_BMK_12994;Munro_Bamboo_unigene_BMK_13005;Munro_Bamboo_unigene_BMK_14847;Munro_Bamboo_unigene_BMK_15239;Munro_Bamboo_unigene_BMK_16600;Munro_Bamboo_unigene_BMK_1739;Munro_Bamboo_unigene_BMK_17893…	K00913+K00913+K00888+K00999+K00999+K00999+K05857+K00888+K00889+K00981+K00901+K00889+K00888+K02183+K00913+K05857+K00889+K00889+K00901+K00889+K00913+K00981+K00888+K00889+K00889+K00889+K00889+K05857+K00901+K00921+K00921+K05857+K02183+K02183+K00889+K00913+K00913+K01092+K05857+K00981+K01099+K00981+K00889+K00921+K02183+K00889+K01107+K00889+K00889+K00889+K05857+K00913+K05857+K00889+K05857+K00981+K00921+…
Phosphonate and phosphinate metabolism	5	Munro_Bamboo_unigene_BMK_3693;Munro_Bamboo_unigene_BMK_41007;Munro_Bamboo_unigene_BMK_5399;Munro_Bamboo_unigene_BMK_949;Munro_Bamboo_unigene_BMK_950;	K00968+K00967+K00967+K00993+K00993
Photosynthesis	115	Munro_Bamboo_unigene_BMK_10478;Munro_Bamboo_unigene_BMK_10479;Munro_Bamboo_unigene_BMK_11881;Munro_Bamboo_unigene_BMK_11921;Munro_Bamboo_unigene_BMK_12431;Munro_Bamboo_unigene_BMK_12432;Munro_Bamboo_unigene_BMK_12678;Munro_Bamboo_unigene_BMK_12809;Munro_Bamboo_unigene_BMK_13458;Munro_Bamboo_unigene_BMK_13658;Munro_Bamboo_unigene_BMK_13673;Munro_Bamboo_unigene_BMK_13868;Munro_Bamboo_unigene_BMK_14…	K08901+K08901+K02639+K02641+K02698+K02698+K02113+K02635+K02641+K02692+K03541+K02639+K02639+K03541+K02639+K02639+K02721+K02704+K02717+K02705+K02701+K02693+K02716+K02638+K08906+K02706+K03541+K02694+K02636+K02639+K02699+K02723+K02721+K02699+K14332+K02693+K02693+K02723+K02721+K02712+K02115+K02638+K02701+K14332+K02111+K02691+K02699+K02699+K02699+K02699+K02109+K02692+K02635+K08901+K03542+K02639+K02639+…
Photosynthesis - antenna proteins	62	Munro_Bamboo_unigene_BMK_10778;Munro_Bamboo_unigene_BMK_11799;Munro_Bamboo_unigene_BMK_12639;Munro_Bamboo_unigene_BMK_12641;Munro_Bamboo_unigene_BMK_12642;Munro_Bamboo_unigene_BMK_12643;Munro_Bamboo_unigene_BMK_12644;Munro_Bamboo_unigene_BMK_12645;Munro_Bamboo_unigene_BMK_12654;Munro_Bamboo_unigene_BMK_12822;Munro_Bamboo_unigene_BMK_13262;Munro_Bamboo_unigene_BMK_14535;Munro_Bamboo_unigene_BMK_17…	K08917+K08912+K08914+K08914+K08912+K08913+K08912+K08913+K08908+K08912+K08908+K08916+K08917+K08914+K08907+K08914+K08913+K08916+K08908+K08907+K08910+K08910+K08916+K08908+K08914+K08909+K08910+K08914+K08914+K08912+K08909+K08913+K08914+K08908+K08915+K08913+K08915+K08909+K08909+K08912+K08907+K08908+K08915+K08911+K08910+K08912+K08916+K08912+K08912+K08916+K08907+K08912+K08915+K14172+K08912+K08912+K08913+…
Photosynthesis proteins	179	Munro_Bamboo_unigene_BMK_10478;Munro_Bamboo_unigene_BMK_10479;Munro_Bamboo_unigene_BMK_10778;Munro_Bamboo_unigene_BMK_11799;Munro_Bamboo_unigene_BMK_11881;Munro_Bamboo_unigene_BMK_11921;Munro_Bamboo_unigene_BMK_12431;Munro_Bamboo_unigene_BMK_12432;Munro_Bamboo_unigene_BMK_12639;Munro_Bamboo_unigene_BMK_12641;Munro_Bamboo_unigene_BMK_12642;Munro_Bamboo_unigene_BMK_12643;Munro_Bamboo_unigene_BMK_12…	K08901+K08901+K08917+K08912+K02639+K02641+K02698+K02698+K08914+K08914+K08912+K08913+K08912+K08913+K08908+K02113+K02635+K08912+K08908+K02641+K02692+K03541+K02639+K08916+K02639+K03541+K02639+K08917+K02639+K02721+K02704+K02717+K02705+K08914+K02701+K02693+K02716+K08907+K02638+K08906+K08914+K08913+K02706+K08916+K03541+K02694+K08908+K08907+K02636+K02639+K02699+K02723+K08910+K02721+K08910+K08916+K08908+…
Phototransduction	6	Munro_Bamboo_unigene_BMK_18672;Munro_Bamboo_unigene_BMK_3671;Munro_Bamboo_unigene_BMK_3673;Munro_Bamboo_unigene_BMK_50043;Munro_Bamboo_unigene_BMK_56204;Munro_Bamboo_unigene_BMK_58481;	K02183+K02183+K02183+K02183+K04536+K02183
Phototransduction - fly	6	Munro_Bamboo_unigene_BMK_18672;Munro_Bamboo_unigene_BMK_3671;Munro_Bamboo_unigene_BMK_3673;Munro_Bamboo_unigene_BMK_50043;Munro_Bamboo_unigene_BMK_58481;Munro_Bamboo_unigene_BMK_66793;	K02183+K02183+K02183+K02183+K02183+K05692
Plant hormone signal transduction	327	Munro_Bamboo_unigene_BMK_10098;Munro_Bamboo_unigene_BMK_10174;Munro_Bamboo_unigene_BMK_10255;Munro_Bamboo_unigene_BMK_10373;Munro_Bamboo_unigene_BMK_10421;Munro_Bamboo_unigene_BMK_10422;Munro_Bamboo_unigene_BMK_1067;Munro_Bamboo_unigene_BMK_10897;Munro_Bamboo_unigene_BMK_10928;Munro_Bamboo_unigene_BMK_11000;Munro_Bamboo_unigene_BMK_11001;Munro_Bamboo_unigene_BMK_11002;Munro_Bamboo_unigene_BMK_110…	K14500+K14492+K14498+K14491+K13415+K13415+K13464+K14492+K14493+K14509+K14509+K14509+K14509+K14509+K14488+K14506+K14500+K14431+K14513+K14432+K14432+K14498+K14498+K14500+K14491+K13415+K14509+K14432+K14509+K14508+K14432+K13464+K14431+K13464+K14497+K14487+K14498+K14432+K14486+K14510+K14486+K14494+K14488+K14490+K14432+K13463+K14495+K14497+K14497+K14497+K14487+K14497+K13415+K14488+K14488+K14486+K14491+…
Plant-pathogen interaction	177	Munro_Bamboo_unigene_BMK_1067;Munro_Bamboo_unigene_BMK_12422;Munro_Bamboo_unigene_BMK_12425;Munro_Bamboo_unigene_BMK_1384;Munro_Bamboo_unigene_BMK_14243;Munro_Bamboo_unigene_BMK_15404;Munro_Bamboo_unigene_BMK_1567;Munro_Bamboo_unigene_BMK_1568;Munro_Bamboo_unigene_BMK_15796;Munro_Bamboo_unigene_BMK_1582;Munro_Bamboo_unigene_BMK_16019;Munro_Bamboo_unigene_BMK_165;Munro_Bamboo_unigene_BMK_166;Munro…	K13464+K13448+K13448+K13464+K13464+K00864+K13430+K13430+K04368+K13429+K13420+K13412+K13412+K13412+K13412+K12795+K13463+K13412+K13430+K02183+K13412+K13412+K05391+K13430+K00864+K13448+K13458+K04079+K13464+K13448+K13412+K13456+K05391+K05391+K05391+K13464+K13448+K13412+K13422+K13430+K13447+K13412+K13412+K13464+K04079+K13448+K13412+K12795+K05391+K13424+K13447+K12795+K13412+K13448+K13448+K13427+K13412+…
Polycyclic aromatic hydrocarbon degradation	13	Munro_Bamboo_unigene_BMK_12312;Munro_Bamboo_unigene_BMK_29542;Munro_Bamboo_unigene_BMK_39438;Munro_Bamboo_unigene_BMK_45163;Munro_Bamboo_unigene_BMK_45544;Munro_Bamboo_unigene_BMK_5107;Munro_Bamboo_unigene_BMK_57066;Munro_Bamboo_unigene_BMK_58693;Munro_Bamboo_unigene_BMK_59225;Munro_Bamboo_unigene_BMK_6836;Munro_Bamboo_unigene_BMK_6837;Munro_Bamboo_unigene_BMK_6839;Munro_Bamboo_unigene_BMK_9033;	K00120+K00599+K00517+K00517+K00599+K00517+K00517+K00517+K00517+K00599+K00599+K00599+K00517
Polyketide sugar unit biosynthesis	2	Munro_Bamboo_unigene_BMK_23354;Munro_Bamboo_unigene_BMK_8031;	K12451+K12451
Porphyrin and chlorophyll metabolism	62	Munro_Bamboo_unigene_BMK_11247;Munro_Bamboo_unigene_BMK_11293;Munro_Bamboo_unigene_BMK_11727;Munro_Bamboo_unigene_BMK_14075;Munro_Bamboo_unigene_BMK_16082;Munro_Bamboo_unigene_BMK_16537;Munro_Bamboo_unigene_BMK_1839;Munro_Bamboo_unigene_BMK_18437;Munro_Bamboo_unigene_BMK_19001;Munro_Bamboo_unigene_BMK_19664;Munro_Bamboo_unigene_BMK_19713;Munro_Bamboo_unigene_BMK_19830;Munro_Bamboo_unigene_BMK_216…	K00231+K13600+K00231+K00522+K00522+K01698+K01772+K01719+K02492+K00522+K01749+K01599+K10960+K02259+K08101+K13606+K01698+K13071+K03404+K08101+K01845+K13071+K00231+K00228+K00218+K01885+K04035+K00218+K00228+K01885+K13606+K01885+K10960+K01599+K03403+K08101+K03403+K00228+K03403+K10960+K08101+K03428+K01845+K08101+K10960+K00510+K13545+K02492+K13545+K00522+K03403+K01599+K00228+K01885+K01749+K03403+K03428+…
Prenyltransferases	70	Munro_Bamboo_unigene_BMK_1119;Munro_Bamboo_unigene_BMK_11279;Munro_Bamboo_unigene_BMK_12036;Munro_Bamboo_unigene_BMK_12708;Munro_Bamboo_unigene_BMK_12837;Munro_Bamboo_unigene_BMK_14198;Munro_Bamboo_unigene_BMK_15955;Munro_Bamboo_unigene_BMK_17193;Munro_Bamboo_unigene_BMK_17353;Munro_Bamboo_unigene_BMK_18615;Munro_Bamboo_unigene_BMK_18766;Munro_Bamboo_unigene_BMK_20767;Munro_Bamboo_unigene_BMK_210…	K14050+K11713+K05356+K05954+K12501+K12501+K14066+K06125+K11778+K12501+K05954+K12501+K14137+K11778+K11778+K11778+K14066+K14066+K05956+K11778+K12501+K00787+K00791+K11778+K05956+K11778+K13789+K02291+K02291+K02548+K11713+K11778+K02291+K02291+K00791+K00787+K00787+K13789+K05356+K13789+K14050+K00787+K00787+K00791+K00787+K13789+K00791+K00801+K12501+K00801+K00787+K11778+K06125+K00791+K00787+K05955+K02548+…
Primary bile acid biosynthesis	1	Munro_Bamboo_unigene_BMK_8743;	K08764
Primary immunodeficiency	6	Munro_Bamboo_unigene_BMK_11912;Munro_Bamboo_unigene_BMK_15289;Munro_Bamboo_unigene_BMK_40022;Munro_Bamboo_unigene_BMK_47561;Munro_Bamboo_unigene_BMK_51686;Munro_Bamboo_unigene_BMK_52638;	K01488+K01488+K03648+K03648+K01488+K03648
Prion diseases	30	Munro_Bamboo_unigene_BMK_10992;Munro_Bamboo_unigene_BMK_12365;Munro_Bamboo_unigene_BMK_12498;Munro_Bamboo_unigene_BMK_12499;Munro_Bamboo_unigene_BMK_14594;Munro_Bamboo_unigene_BMK_15796;Munro_Bamboo_unigene_BMK_17186;Munro_Bamboo_unigene_BMK_24620;Munro_Bamboo_unigene_BMK_25793;Munro_Bamboo_unigene_BMK_27108;Munro_Bamboo_unigene_BMK_27565;Munro_Bamboo_unigene_BMK_2868;Munro_Bamboo_unigene_BMK_287…	K04371+K04565+K04565+K04565+K04565+K04368+K04371+K04371+K04371+K04371+K04371+K09490+K09553+K09553+K04371+K09203+K04565+K09553+K09553+K04371+K04371+K04371+K04368+K04368+K09553+K04371+K09553+K04565+K04565+K04371
Progesterone-mediated oocyte maturation	82	Munro_Bamboo_unigene_BMK_10236;Munro_Bamboo_unigene_BMK_10992;Munro_Bamboo_unigene_BMK_11166;Munro_Bamboo_unigene_BMK_11822;Munro_Bamboo_unigene_BMK_12895;Munro_Bamboo_unigene_BMK_13361;Munro_Bamboo_unigene_BMK_13776;Munro_Bamboo_unigene_BMK_15796;Munro_Bamboo_unigene_BMK_1622;Munro_Bamboo_unigene_BMK_16426;Munro_Bamboo_unigene_BMK_16627;Munro_Bamboo_unigene_BMK_16721;Munro_Bamboo_unigene_BMK_167…	K03349+K04371+K05868+K06627+K05868+K03348+K03348+K04368+K03354+K06627+K13728+K06627+K02537+K04371+K03357+K03351+K03348+K04079+K04371+K02178+K04371+K03352+K04371+K02178+K02178+K04371+K04079+K03355+K03350+K04371+K03352+K03351+K04079+K06627+K06627+K03348+K03352+K04079+K03351+K04079+K06627+K03349+K03350+K03351+K04079+K03348+K02178+K03352+K04079+K06627+K03364+K04079+K06638+K03364+K06627+K03348+K04371+…
Propanoate metabolism	60	Munro_Bamboo_unigene_BMK_10263;Munro_Bamboo_unigene_BMK_11032;Munro_Bamboo_unigene_BMK_1153;Munro_Bamboo_unigene_BMK_12096;Munro_Bamboo_unigene_BMK_12377;Munro_Bamboo_unigene_BMK_13176;Munro_Bamboo_unigene_BMK_15047;Munro_Bamboo_unigene_BMK_15353;Munro_Bamboo_unigene_BMK_16791;Munro_Bamboo_unigene_BMK_17560;Munro_Bamboo_unigene_BMK_17641;Munro_Bamboo_unigene_BMK_18406;Munro_Bamboo_unigene_BMK_198…	K05605+K00128+K00626+K14085+K00128+K00128+K01895+K11262+K11262+K11262+K00128+K00249+K14085+K11262+K00249+K01578+K00249+K01692+K00128+K11262+K01899+K00140+K00016+K00128+K00626+K01895+K01895+K01895+K11262+K01578+K00626+K11262+K11262+K00249+K11262+K05605+K00249+K11262+K00128+K00016+K11262+K00128+K00626+K00128+K01692+K11262+K11262+K00128+K00140+K00128+K01900+K05605+K14085+K11262+K11262+K11262+K00626+…
Prostate cancer	65	Munro_Bamboo_unigene_BMK_10992;Munro_Bamboo_unigene_BMK_13872;Munro_Bamboo_unigene_BMK_14854;Munro_Bamboo_unigene_BMK_15796;Munro_Bamboo_unigene_BMK_17186;Munro_Bamboo_unigene_BMK_1792;Munro_Bamboo_unigene_BMK_19223;Munro_Bamboo_unigene_BMK_19954;Munro_Bamboo_unigene_BMK_230;Munro_Bamboo_unigene_BMK_23879;Munro_Bamboo_unigene_BMK_24585;Munro_Bamboo_unigene_BMK_24620;Munro_Bamboo_unigene_BMK_25793…	K04371+K07203+K04498+K04368+K04371+K04498+K04498+K04498+K04079+K04498+K04498+K04371+K04371+K06276+K04371+K04371+K04079+K04498+K03083+K04371+K04498+K04079+K06620+K06276+K04079+K04498+K04498+K04079+K04498+K04498+K09487+K04079+K07203+K04079+K07203+K04079+K03083+K04498+K03083+K04371+K04371+K04371+K07203+K07203+K07203+K04079+K04498+K04498+K07203+K04498+K04368+K04368+K04371+K04498+K04079+K04498+K07203+…
Proteasome	174	Munro_Bamboo_unigene_BMK_10096;Munro_Bamboo_unigene_BMK_10097;Munro_Bamboo_unigene_BMK_10148;Munro_Bamboo_unigene_BMK_10671;Munro_Bamboo_unigene_BMK_10847;Munro_Bamboo_unigene_BMK_11873;Munro_Bamboo_unigene_BMK_11899;Munro_Bamboo_unigene_BMK_12030;Munro_Bamboo_unigene_BMK_12031;Munro_Bamboo_unigene_BMK_12203;Munro_Bamboo_unigene_BMK_12315;Munro_Bamboo_unigene_BMK_12352;Munro_Bamboo_unigene_BMK_12…	K10839+K10839+K03032+K03035+K03283+K06692+K03061+K03039+K03039+K03031+K03283+K03066+K03066+K03283+K10839+K03032+K03283+K03036+K03032+K03063+K02737+K03039+K06695+K11883+K11886+K02730+K11886+K03032+K03283+K02730+K03283+K02734+K02729+K03283+K02727+K03066+K02725+K04079+K06699+K10881+K03061+K02727+K10881+K03283+K03039+K02731+K11876+K06700+K03283+K03283+K02728+K03283+K03283+K04079+K03283+K02737+K11876+…
Protein digestion and absorption	13	Munro_Bamboo_unigene_BMK_1813;Munro_Bamboo_unigene_BMK_19452;Munro_Bamboo_unigene_BMK_22724;Munro_Bamboo_unigene_BMK_27961;Munro_Bamboo_unigene_BMK_53617;Munro_Bamboo_unigene_BMK_53846;Munro_Bamboo_unigene_BMK_5391;Munro_Bamboo_unigene_BMK_54160;Munro_Bamboo_unigene_BMK_56868;Munro_Bamboo_unigene_BMK_5782;Munro_Bamboo_unigene_BMK_58355;Munro_Bamboo_unigene_BMK_66933;Munro_Bamboo_unigene_BMK_8270;	K01278+K01285+K14209+K14209+K14209+K14209+K14209+K01285+K14207+K01285+K01285+K14209+K01285
Protein export	96	Munro_Bamboo_unigene_BMK_10054;Munro_Bamboo_unigene_BMK_10121;Munro_Bamboo_unigene_BMK_12006;Munro_Bamboo_unigene_BMK_1218;Munro_Bamboo_unigene_BMK_12591;Munro_Bamboo_unigene_BMK_12592;Munro_Bamboo_unigene_BMK_12593;Munro_Bamboo_unigene_BMK_13178;Munro_Bamboo_unigene_BMK_13869;Munro_Bamboo_unigene_BMK_14230;Munro_Bamboo_unigene_BMK_14778;Munro_Bamboo_unigene_BMK_15314;Munro_Bamboo_unigene_BMK_157…	K03110+K12272+K03217+K12948+K03106+K03106+K03106+K07342+K09648+K03106+K10956+K03106+K13431+K03105+K03118+K03070+K03070+K03100+K03217+K03070+K03070+K03105+K03116+K03108+K09490+K07342+K03100+K03217+K13280+K03105+K07342+K09481+K03109+K03070+K03100+K13431+K09481+K12272+K03100+K03106+K10956+K03070+K03105+K03217+K12272+K09540+K10956+K12275+K03217+K03070+K03100+K03105+K13431+K03100+K10956+K13431+K12948+…
Protein kinases	310	Munro_Bamboo_unigene_BMK_10098;Munro_Bamboo_unigene_BMK_10136;Munro_Bamboo_unigene_BMK_10137;Munro_Bamboo_unigene_BMK_10255;Munro_Bamboo_unigene_BMK_10421;Munro_Bamboo_unigene_BMK_10422;Munro_Bamboo_unigene_BMK_10512;Munro_Bamboo_unigene_BMK_10540;Munro_Bamboo_unigene_BMK_10885;Munro_Bamboo_unigene_BMK_10992;Munro_Bamboo_unigene_BMK_11150;Munro_Bamboo_unigene_BMK_11405;Munro_Bamboo_unigene_BMK_11…	K14500+K08876+K08876+K14498+K13415+K13415+K08857+K03125+K08850+K04371+K14500+K02202+K08869+K08869+K08884+K08864+K14498+K03097+K03097+K14498+K00898+K00898+K00898+K14500+K13415+K08869+K07203+K04728+K00898+K14498+K08856+K07179+K08869+K14510+K13430+K13430+K04368+K13429+K08850+K13420+K07198+K13412+K13412+K07178+K07178+K13412+K08857+K13412+K04371+K07760+K13412+K08869+K08869+K13415+K08827+K13430+K08819+…
Protein processing in endoplasmic reticulum	306	Munro_Bamboo_unigene_BMK_10000;Munro_Bamboo_unigene_BMK_10096;Munro_Bamboo_unigene_BMK_10097;Munro_Bamboo_unigene_BMK_10283;Munro_Bamboo_unigene_BMK_10308;Munro_Bamboo_unigene_BMK_10315;Munro_Bamboo_unigene_BMK_10352;Munro_Bamboo_unigene_BMK_104;Munro_Bamboo_unigene_BMK_105;Munro_Bamboo_unigene_BMK_10847;Munro_Bamboo_unigene_BMK_11077;Munro_Bamboo_unigene_BMK_11143;Munro_Bamboo_unigene_BMK_11144;…	K10601+K10839+K10839+K14006+K09584+K09584+K09584+K08054+K08054+K03283+K11718+K14007+K14007+K09486+K09580+K13719+K09580+K09580+K09580+K09580+K07953+K07953+K07953+K07953+K03283+K14012+K08288+K07342+K13993+K10666+K03283+K01230+K01230+K01228+K01230+K10956+K10839+K09561+K01230+K03283+K10085+K14007+K10666+K03094+K09562+K13719+K14006+K06689+K08057+K13250+K04554+K09486+K05546+K06689+K03283+K12668+K14011+…
Proteoglycans	1	Munro_Bamboo_unigene_BMK_20480;	K06669
Proximal tubule bicarbonate reclamation	6	Munro_Bamboo_unigene_BMK_112;Munro_Bamboo_unigene_BMK_11240;Munro_Bamboo_unigene_BMK_13251;Munro_Bamboo_unigene_BMK_21166;Munro_Bamboo_unigene_BMK_37358;Munro_Bamboo_unigene_BMK_54838;	K00025+K00261+K00025+K00261+K00261+K00025
Purine metabolism	254	Munro_Bamboo_unigene_BMK_10171;Munro_Bamboo_unigene_BMK_10194;Munro_Bamboo_unigene_BMK_10272;Munro_Bamboo_unigene_BMK_10810;Munro_Bamboo_unigene_BMK_10819;Munro_Bamboo_unigene_BMK_10988;Munro_Bamboo_unigene_BMK_11129;Munro_Bamboo_unigene_BMK_1129;Munro_Bamboo_unigene_BMK_1130;Munro_Bamboo_unigene_BMK_1131;Munro_Bamboo_unigene_BMK_11384;Munro_Bamboo_unigene_BMK_11385;Munro_Bamboo_unigene_BMK_11814…	K00601+K01923+K03006+K00948+K03017+K00940+K11808+K01490+K01490+K01490+K00759+K00759+K03787+K01488+K01939+K03002+K02325+K02320+K00939+K00759+K01952+K14641+K10807+K03018+K01933+K02685+K03022+K01939+K00088+K01488+K03006+K02684+K00602+K00602+K01522+K00764+K01952+K03007+K03016+K00873+K02999+K02999+K03021+K01466+K01466+K00860+K00962+K01952+K00106+K03006+K00860+K00860+K02327+K00948+K02321+K03016+K10807+…
Pyrimidine metabolism	219	Munro_Bamboo_unigene_BMK_10272;Munro_Bamboo_unigene_BMK_1045;Munro_Bamboo_unigene_BMK_10819;Munro_Bamboo_unigene_BMK_10988;Munro_Bamboo_unigene_BMK_11315;Munro_Bamboo_unigene_BMK_11814;Munro_Bamboo_unigene_BMK_11823;Munro_Bamboo_unigene_BMK_1194;Munro_Bamboo_unigene_BMK_12081;Munro_Bamboo_unigene_BMK_12192;Munro_Bamboo_unigene_BMK_13146;Munro_Bamboo_unigene_BMK_13410;Munro_Bamboo_unigene_BMK_1381…	K03006+K01431+K03017+K00940+K00943+K03787+K01937+K03002+K02325+K02320+K14641+K10807+K03018+K02685+K03022+K01489+K01937+K03006+K02684+K03007+K13998+K03016+K02999+K02999+K00857+K03021+K00962+K13421+K13421+K03006+K01955+K02327+K01937+K00761+K01937+K02321+K03016+K10807+K13421+K03026+K14641+K10807+K02324+K02335+K02321+K00962+K03020+K03026+K13421+K03006+K00761+K03787+K03010+K13421+K10807+K02320+K03008+…
Pyruvate metabolism	168	Munro_Bamboo_unigene_BMK_10289;Munro_Bamboo_unigene_BMK_10290;Munro_Bamboo_unigene_BMK_11032;Munro_Bamboo_unigene_BMK_112;Munro_Bamboo_unigene_BMK_11214;Munro_Bamboo_unigene_BMK_11252;Munro_Bamboo_unigene_BMK_1153;Munro_Bamboo_unigene_BMK_11786;Munro_Bamboo_unigene_BMK_11913;Munro_Bamboo_unigene_BMK_12096;Munro_Bamboo_unigene_BMK_12341;Munro_Bamboo_unigene_BMK_12377;Munro_Bamboo_unigene_BMK_13090…	K00162+K00162+K00128+K00025+K00627+K00382+K00626+K00029+K00161+K14085+K00026+K00128+K01595+K00128+K00025+K00026+K01649+K01595+K00026+K01895+K00627+K00029+K11262+K00382+K00026+K00161+K00873+K01638+K01759+K11262+K00026+K11262+K00128+K00028+K00029+K14085+K11262+K00382+K00382+K01595+K01595+K01595+K00029+K00029+K00026+K00627+K00382+K01649+K01610+K01759+K00128+K00627+K01595+K00026+K11262+K00161+K01610+…
RIG-I-like receptor signaling pathway	19	Munro_Bamboo_unigene_BMK_20006;Munro_Bamboo_unigene_BMK_24453;Munro_Bamboo_unigene_BMK_24907;Munro_Bamboo_unigene_BMK_29156;Munro_Bamboo_unigene_BMK_33997;Munro_Bamboo_unigene_BMK_37815;Munro_Bamboo_unigene_BMK_3861;Munro_Bamboo_unigene_BMK_39230;Munro_Bamboo_unigene_BMK_50679;Munro_Bamboo_unigene_BMK_50994;Munro_Bamboo_unigene_BMK_53566;Munro_Bamboo_unigene_BMK_55582;Munro_Bamboo_unigene_BMK_560…	K09578+K09578+K11594+K09578+K09578+K08336+K12655+K08339+K11594+K09578+K11594+K11594+K08339+K11594+K11594+K11594+K11594+K11594+K11594
RNA degradation	219	Munro_Bamboo_unigene_BMK_10234;Munro_Bamboo_unigene_BMK_1024;Munro_Bamboo_unigene_BMK_10257;Munro_Bamboo_unigene_BMK_10258;Munro_Bamboo_unigene_BMK_10259;Munro_Bamboo_unigene_BMK_10260;Munro_Bamboo_unigene_BMK_10476;Munro_Bamboo_unigene_BMK_10597;Munro_Bamboo_unigene_BMK_10629;Munro_Bamboo_unigene_BMK_10655;Munro_Bamboo_unigene_BMK_1099;Munro_Bamboo_unigene_BMK_11277;Munro_Bamboo_unigene_BMK_1194…	K12608+K12619+K12622+K12622+K12622+K12622+K12605+K13126+K13126+K12603+K12605+K12604+K03681+K01689+K03654+K12598+K04043+K12622+K12580+K12626+K01148+K01148+K12604+K04077+K03654+K12619+K12598+K01689+K03679+K12591+K12599+K12619+K00962+K14442+K14442+K14442+K14442+K12586+K12598+K12607+K07573+K00962+K12606+K12593+K12625+K03654+K12616+K12603+K04077+K14442+K12619+K12593+K12581+K12619+K12598+K12614+K14442+…
RNA polymerase	72	Munro_Bamboo_unigene_BMK_10272;Munro_Bamboo_unigene_BMK_10819;Munro_Bamboo_unigene_BMK_1194;Munro_Bamboo_unigene_BMK_13815;Munro_Bamboo_unigene_BMK_1445;Munro_Bamboo_unigene_BMK_15301;Munro_Bamboo_unigene_BMK_16024;Munro_Bamboo_unigene_BMK_16200;Munro_Bamboo_unigene_BMK_16395;Munro_Bamboo_unigene_BMK_16509;Munro_Bamboo_unigene_BMK_1688;Munro_Bamboo_unigene_BMK_18966;Munro_Bamboo_unigene_BMK_20174…	K03006+K03017+K03002+K03018+K03022+K03006+K03007+K03016+K02999+K02999+K03021+K03006+K03016+K03026+K03020+K03026+K03006+K03010+K03008+K03024+K03093+K03027+K03018+K03009+K03009+K03014+K03016+K03017+K03013+K03006+K02999+K03011+K03020+K03024+K03025+K02999+K03017+K03011+K03012+K03027+K03018+K03018+K03046+K03013+K03025+K03019+K03017+K03016+K03006+K14721+K03006+K03022+K03005+K03021+K03000+K03008+K03012+…
RNA transport	327	Munro_Bamboo_unigene_BMK_10067;Munro_Bamboo_unigene_BMK_10080;Munro_Bamboo_unigene_BMK_10597;Munro_Bamboo_unigene_BMK_10629;Munro_Bamboo_unigene_BMK_10856;Munro_Bamboo_unigene_BMK_10927;Munro_Bamboo_unigene_BMK_10932;Munro_Bamboo_unigene_BMK_10935;Munro_Bamboo_unigene_BMK_10979;Munro_Bamboo_unigene_BMK_11100;Munro_Bamboo_unigene_BMK_11111;Munro_Bamboo_unigene_BMK_113;Munro_Bamboo_unigene_BMK_1134…	K03240+K13114+K13126+K13126+K03260+K03260+K03260+K03260+K03260+K14320+K03238+K03257+K14310+K14310+K14310+K14310+K03257+K03246+K14328+K14324+K14297+K03242+K02516+K12812+K12812+K12812+K14314+K14300+K12879+K03262+K14327+K14326+K03231+K14300+K03262+K14292+K14319+K03260+K12875+K14288+K13025+K12881+K13175+K13130+K12876+K03243+K13176+K03680+K03231+K14290+K03259+K07562+K12812+K03113+K03262+K03257+K13175+…
Regulation of actin cytoskeleton	104	Munro_Bamboo_unigene_BMK_10057;Munro_Bamboo_unigene_BMK_10376;Munro_Bamboo_unigene_BMK_10992;Munro_Bamboo_unigene_BMK_11103;Munro_Bamboo_unigene_BMK_117;Munro_Bamboo_unigene_BMK_11795;Munro_Bamboo_unigene_BMK_12381;Munro_Bamboo_unigene_BMK_12485;Munro_Bamboo_unigene_BMK_12486;Munro_Bamboo_unigene_BMK_12712;Munro_Bamboo_unigene_BMK_13792;Munro_Bamboo_unigene_BMK_14847;Munro_Bamboo_unigene_BMK_1526…	K05749+K05747+K04371+K05755+K05752+K05759+K04392+K05758+K05758+K05747+K05765+K00889+K05747+K04392+K04392+K04368+K04371+K00889+K04392+K05758+K00889+K04392+K05758+K04392+K00889+K00889+K05765+K04371+K04392+K04392+K04371+K05757+K00889+K04392+K04392+K04392+K04371+K04392+K04371+K04392+K06269+K00889+K00889+K04392+K04371+K00889+K05752+K06269+K00921+K00921+K04392+K06269+K05747+K00889+K05759+K05765+K06269+…
Regulation of autophagy	28	Munro_Bamboo_unigene_BMK_11530;Munro_Bamboo_unigene_BMK_12495;Munro_Bamboo_unigene_BMK_12496;Munro_Bamboo_unigene_BMK_12497;Munro_Bamboo_unigene_BMK_16468;Munro_Bamboo_unigene_BMK_22710;Munro_Bamboo_unigene_BMK_23550;Munro_Bamboo_unigene_BMK_24601;Munro_Bamboo_unigene_BMK_30204;Munro_Bamboo_unigene_BMK_34914;Munro_Bamboo_unigene_BMK_37030;Munro_Bamboo_unigene_BMK_37815;Munro_Bamboo_unigene_BMK_38…	K08334+K08341+K08341+K08341+K07198+K08334+K08333+K08342+K07198+K08342+K08342+K08336+K07198+K08339+K08337+K08341+K08342+K08334+K08339+K08337+K08342+K08333+K08337+K08337+K08337+K08341+K08341+K08269
Renal cell carcinoma	67	Munro_Bamboo_unigene_BMK_10041;Munro_Bamboo_unigene_BMK_10042;Munro_Bamboo_unigene_BMK_10043;Munro_Bamboo_unigene_BMK_10992;Munro_Bamboo_unigene_BMK_12381;Munro_Bamboo_unigene_BMK_14854;Munro_Bamboo_unigene_BMK_15446;Munro_Bamboo_unigene_BMK_15508;Munro_Bamboo_unigene_BMK_15796;Munro_Bamboo_unigene_BMK_17186;Munro_Bamboo_unigene_BMK_1792;Munro_Bamboo_unigene_BMK_18311;Munro_Bamboo_unigene_BMK_192…	K01679+K01679+K01679+K04371+K04392+K04498+K04392+K04392+K04368+K04371+K04498+K04392+K04498+K04498+K04392+K04392+K01679+K04498+K04498+K04371+K04392+K04392+K04371+K04392+K04392+K04392+K01679+K04371+K04392+K04371+K04392+K04392+K04498+K04371+K04498+K03868+K03868+K04392+K04498+K04498+K04498+K04498+K01679+K04392+K04498+K04392+K04371+K04371+K04371+K04498+K04498+K04392+K04498+K04368+K04368+K03872+K01679+…
Renin-angiotensin system	15	Munro_Bamboo_unigene_BMK_18500;Munro_Bamboo_unigene_BMK_19832;Munro_Bamboo_unigene_BMK_22155;Munro_Bamboo_unigene_BMK_28167;Munro_Bamboo_unigene_BMK_31638;Munro_Bamboo_unigene_BMK_35878;Munro_Bamboo_unigene_BMK_38471;Munro_Bamboo_unigene_BMK_40452;Munro_Bamboo_unigene_BMK_58937;Munro_Bamboo_unigene_BMK_59190;Munro_Bamboo_unigene_BMK_60907;Munro_Bamboo_unigene_BMK_62567;Munro_Bamboo_unigene_BMK_63…	K01392+K13289+K13289+K13289+K13289+K13289+K13289+K13289+K13289+K01392+K13289+K13289+K01392+K13289+K13289
Retinol metabolism	24	Munro_Bamboo_unigene_BMK_11066;Munro_Bamboo_unigene_BMK_11088;Munro_Bamboo_unigene_BMK_14015;Munro_Bamboo_unigene_BMK_1975;Munro_Bamboo_unigene_BMK_25705;Munro_Bamboo_unigene_BMK_27371;Munro_Bamboo_unigene_BMK_2859;Munro_Bamboo_unigene_BMK_31328;Munro_Bamboo_unigene_BMK_33650;Munro_Bamboo_unigene_BMK_36046;Munro_Bamboo_unigene_BMK_36587;Munro_Bamboo_unigene_BMK_36795;Munro_Bamboo_unigene_BMK_3685…	K00001+K00001+K00001+K00001+K00001+K00001+K00121+K11155+K00001+K00001+K00001+K00001+K00121+K00001+K00121+K00001+K00001+K11155+K00001+K00121+K11155+K11155+K00121+K11147
Rheumatoid arthritis	56	Munro_Bamboo_unigene_BMK_10869;Munro_Bamboo_unigene_BMK_10871;Munro_Bamboo_unigene_BMK_15608;Munro_Bamboo_unigene_BMK_20993;Munro_Bamboo_unigene_BMK_22303;Munro_Bamboo_unigene_BMK_24835;Munro_Bamboo_unigene_BMK_26028;Munro_Bamboo_unigene_BMK_27614;Munro_Bamboo_unigene_BMK_28188;Munro_Bamboo_unigene_BMK_29473;Munro_Bamboo_unigene_BMK_30057;Munro_Bamboo_unigene_BMK_3006;Munro_Bamboo_unigene_BMK_301…	K02150+K02150+K02147+K02150+K02152+K02155+K02147+K02155+K02154+K02151+K02148+K02154+K02155+K02155+K02155+K02155+K02155+K02155+K02155+K02155+K02155+K02148+K02154+K02150+K02150+K02154+K02145+K02145+K02144+K02155+K02150+K02147+K02151+K02154+K02155+K02154+K02152+K02154+K02155+K02149+K02154+K02146+K02154+K02155+K02155+K02147+K03661+K02149+K02149+K01365+K01365+K02155+K02155+K02154+K02153+K02145
Riboflavin metabolism	10	Munro_Bamboo_unigene_BMK_34471;Munro_Bamboo_unigene_BMK_43129;Munro_Bamboo_unigene_BMK_49453;Munro_Bamboo_unigene_BMK_53258;Munro_Bamboo_unigene_BMK_56487;Munro_Bamboo_unigene_BMK_5826;Munro_Bamboo_unigene_BMK_62983;Munro_Bamboo_unigene_BMK_63975;Munro_Bamboo_unigene_BMK_67282;Munro_Bamboo_unigene_BMK_67511;	K14652+K14652+K11752+K00793+K14652+K00861+K00793+K11752+K14652+K11752
Ribosome	323	Munro_Bamboo_unigene_BMK_100;Munro_Bamboo_unigene_BMK_10011;Munro_Bamboo_unigene_BMK_10091;Munro_Bamboo_unigene_BMK_11165;Munro_Bamboo_unigene_BMK_11284;Munro_Bamboo_unigene_BMK_11311;Munro_Bamboo_unigene_BMK_11768;Munro_Bamboo_unigene_BMK_11937;Munro_Bamboo_unigene_BMK_11966;Munro_Bamboo_unigene_BMK_12177;Munro_Bamboo_unigene_BMK_12212;Munro_Bamboo_unigene_BMK_12213;Munro_Bamboo_unigene_BMK_1230…	K02900+K02945+K02993+K02871+K02917+K02915+K02949+K02931+K02896+K02921+K02872+K02872+K02924+K02976+K02985+K02985+K02991+K02966+K02978+K02978+K02867+K02867+K02951+K02941+K02935+K02923+K02876+K02912+K02912+K02882+K02951+K02965+K02993+K02879+K02993+K02995+K02880+K02951+K02920+K02908+K02942+K02938+K02912+K02910+K02957+K02964+K02886+K02979+K02935+K02871+K02958+K02951+K02971+K02942+K02901+K02951+K02986+…
Ribosome biogenesis in eukaryotes	211	Munro_Bamboo_unigene_BMK_10230;Munro_Bamboo_unigene_BMK_1024;Munro_Bamboo_unigene_BMK_10488;Munro_Bamboo_unigene_BMK_10628;Munro_Bamboo_unigene_BMK_10644;Munro_Bamboo_unigene_BMK_10752;Munro_Bamboo_unigene_BMK_10876;Munro_Bamboo_unigene_BMK_10877;Munro_Bamboo_unigene_BMK_10929;Munro_Bamboo_unigene_BMK_11597;Munro_Bamboo_unigene_BMK_11598;Munro_Bamboo_unigene_BMK_11599;Munro_Bamboo_unigene_BMK_116…	K03115+K12619+K14567+K14567+K14567+K14537+K14567+K14567+K14535+K11131+K11131+K11131+K14555+K14555+K11130+K11130+K03097+K03097+K13288+K14550+K14572+K07179+K14552+K12619+K14558+K11131+K14521+K14290+K07178+K07178+K07562+K12619+K11131+K11108+K11883+K07178+K13288+K14525+K14544+K14521+K03097+K14539+K14538+K14570+K14290+K14570+K03115+K14568+K01164+K14559+K02218+K07936+K12845+K03097+K12619+K14290+K12619+…
SNARE interactions in vesicular transport	51	Munro_Bamboo_unigene_BMK_11802;Munro_Bamboo_unigene_BMK_11970;Munro_Bamboo_unigene_BMK_12181;Munro_Bamboo_unigene_BMK_12182;Munro_Bamboo_unigene_BMK_12254;Munro_Bamboo_unigene_BMK_13014;Munro_Bamboo_unigene_BMK_13395;Munro_Bamboo_unigene_BMK_14456;Munro_Bamboo_unigene_BMK_17234;Munro_Bamboo_unigene_BMK_17996;Munro_Bamboo_unigene_BMK_18291;Munro_Bamboo_unigene_BMK_20146;Munro_Bamboo_unigene_BMK_20…	K08488+K08503+K08515+K08515+K08495+K08486+K08486+K08490+K08493+K08496+K08495+K08496+K08493+K08493+K08497+K08493+K08490+K08504+K08505+K08493+K08488+K08495+K08504+K08504+K08488+K08495+K08516+K08515+K08515+K08515+K08503+K08496+K08498+K08516+K08492+K08492+K08492+K08493+K08504+K08516+K08517+K08504+K08506+K08495+K08493+K08497+K08505+K08493+K08515+K08515+K08500
SNAREs	62	Munro_Bamboo_unigene_BMK_11802;Munro_Bamboo_unigene_BMK_11970;Munro_Bamboo_unigene_BMK_12180;Munro_Bamboo_unigene_BMK_12181;Munro_Bamboo_unigene_BMK_12182;Munro_Bamboo_unigene_BMK_12183;Munro_Bamboo_unigene_BMK_12184;Munro_Bamboo_unigene_BMK_12254;Munro_Bamboo_unigene_BMK_13014;Munro_Bamboo_unigene_BMK_13395;Munro_Bamboo_unigene_BMK_14456;Munro_Bamboo_unigene_BMK_15365;Munro_Bamboo_unigene_BMK_16…	K08488+K08503+K08511+K08515+K08515+K08511+K08511+K08495+K08486+K08486+K08490+K08518+K08518+K08493+K08496+K08495+K08496+K08493+K08493+K08497+K08493+K08490+K08504+K08494+K08505+K08493+K08488+K08495+K08504+K08504+K08488+K08495+K08516+K08515+K08515+K08511+K08515+K08503+K08496+K08498+K08518+K08518+K08516+K08492+K08492+K08492+K08493+K08504+K08516+K08517+K08504+K08511+K08506+K08495+K08493+K08497+K08518+…
Salivary secretion	5	Munro_Bamboo_unigene_BMK_18672;Munro_Bamboo_unigene_BMK_3671;Munro_Bamboo_unigene_BMK_3673;Munro_Bamboo_unigene_BMK_50043;Munro_Bamboo_unigene_BMK_58481;	K02183+K02183+K02183+K02183+K02183
Secretion system	83	Munro_Bamboo_unigene_BMK_10054;Munro_Bamboo_unigene_BMK_10121;Munro_Bamboo_unigene_BMK_12006;Munro_Bamboo_unigene_BMK_12591;Munro_Bamboo_unigene_BMK_12592;Munro_Bamboo_unigene_BMK_12593;Munro_Bamboo_unigene_BMK_13178;Munro_Bamboo_unigene_BMK_14230;Munro_Bamboo_unigene_BMK_14778;Munro_Bamboo_unigene_BMK_15314;Munro_Bamboo_unigene_BMK_15726;Munro_Bamboo_unigene_BMK_16145;Munro_Bamboo_unigene_BMK_16…	K03110+K12272+K03217+K03106+K03106+K03106+K07342+K03106+K10956+K03106+K13431+K03105+K02221+K12271+K03118+K03070+K03070+K03217+K03070+K03070+K03105+K03116+K03108+K07342+K03217+K03105+K07342+K09481+K03109+K03070+K12271+K02221+K13431+K09481+K12272+K03106+K10956+K03070+K03105+K03217+K12272+K09540+K10956+K12275+K03217+K03070+K03105+K13431+K10956+K13431+K03106+K03217+K12271+K03105+K03070+K10956+K03217+…
Selenocompound metabolism	32	Munro_Bamboo_unigene_BMK_11542;Munro_Bamboo_unigene_BMK_16437;Munro_Bamboo_unigene_BMK_21616;Munro_Bamboo_unigene_BMK_23398;Munro_Bamboo_unigene_BMK_25137;Munro_Bamboo_unigene_BMK_26413;Munro_Bamboo_unigene_BMK_28934;Munro_Bamboo_unigene_BMK_3180;Munro_Bamboo_unigene_BMK_34933;Munro_Bamboo_unigene_BMK_35651;Munro_Bamboo_unigene_BMK_3724;Munro_Bamboo_unigene_BMK_3726;Munro_Bamboo_unigene_BMK_39814…	K11717+K01874+K01874+K08247+K01760+K00549+K01761+K01739+K08247+K01761+K00549+K00549+K08247+K01874+K01739+K00384+K01760+K01874+K01761+K00384+K00384+K00384+K13811+K13811+K00384+K00384+K01874+K01739+K13811+K00384+K08247+K13811
Shigellosis	67	Munro_Bamboo_unigene_BMK_10376;Munro_Bamboo_unigene_BMK_10992;Munro_Bamboo_unigene_BMK_11103;Munro_Bamboo_unigene_BMK_11795;Munro_Bamboo_unigene_BMK_12381;Munro_Bamboo_unigene_BMK_12485;Munro_Bamboo_unigene_BMK_12486;Munro_Bamboo_unigene_BMK_12712;Munro_Bamboo_unigene_BMK_15264;Munro_Bamboo_unigene_BMK_15446;Munro_Bamboo_unigene_BMK_15508;Munro_Bamboo_unigene_BMK_16627;Munro_Bamboo_unigene_BMK_17…	K05747+K04371+K05755+K05759+K04392+K05758+K05758+K05747+K05747+K04392+K04392+K13728+K04371+K12836+K04392+K05758+K04392+K05758+K04392+K04371+K04392+K04392+K04371+K05757+K04392+K04392+K04392+K04371+K04392+K04371+K04392+K04392+K04371+K04392+K12836+K12836+K12836+K12836+K05747+K08339+K05759+K04392+K12836+K04392+K12836+K04371+K04371+K04371+K05758+K05756+K05758+K04392+K08339+K05757+K05754+K04371+K05758+…
Small cell lung cancer	7	Munro_Bamboo_unigene_BMK_15653;Munro_Bamboo_unigene_BMK_34826;Munro_Bamboo_unigene_BMK_43852;Munro_Bamboo_unigene_BMK_51819;Munro_Bamboo_unigene_BMK_60543;Munro_Bamboo_unigene_BMK_60743;Munro_Bamboo_unigene_BMK_8275;	K01522+K06620+K08738+K08738+K01522+K08738+K01110
Sphingolipid metabolism	48	Munro_Bamboo_unigene_BMK_10022;Munro_Bamboo_unigene_BMK_1431;Munro_Bamboo_unigene_BMK_16877;Munro_Bamboo_unigene_BMK_1823;Munro_Bamboo_unigene_BMK_1824;Munro_Bamboo_unigene_BMK_20564;Munro_Bamboo_unigene_BMK_21870;Munro_Bamboo_unigene_BMK_22461;Munro_Bamboo_unigene_BMK_2269;Munro_Bamboo_unigene_BMK_23981;Munro_Bamboo_unigene_BMK_24757;Munro_Bamboo_unigene_BMK_24813;Munro_Bamboo_unigene_BMK_25323;…	K00654+K00654+K07407+K04712+K04712+K12353+K07407+K04708+K04718+K00654+K04712+K12353+K12309+K07407+K00654+K00654+K04715+K07407+K07407+K00654+K12309+K00654+K01634+K12353+K04711+K07407+K04708+K00654+K12353+K04715+K00654+K04712+K04711+K07407+K04715+K07407+K07407+K12353+K12353+K00654+K00654+K01190+K12309+K04715+K12349+K12349+K04711+K01190
Spliceosome	573	Munro_Bamboo_unigene_BMK_10012;Munro_Bamboo_unigene_BMK_10035;Munro_Bamboo_unigene_BMK_10036;Munro_Bamboo_unigene_BMK_10037;Munro_Bamboo_unigene_BMK_10038;Munro_Bamboo_unigene_BMK_10039;Munro_Bamboo_unigene_BMK_10080;Munro_Bamboo_unigene_BMK_10161;Munro_Bamboo_unigene_BMK_10162;Munro_Bamboo_unigene_BMK_10257;Munro_Bamboo_unigene_BMK_10258;Munro_Bamboo_unigene_BMK_10259;Munro_Bamboo_unigene_BMK_10…	K11095+K12862+K12862+K12862+K12862+K12862+K13114+K12839+K12839+K12622+K12622+K12622+K12622+K13111+K13153+K13126+K13126+K03283+K13123+K12823+K12823+K13150+K12860+K12860+K12865+K12846+K13096+K12842+K12831+K12831+K13093+K13210+K13128+K03283+K11097+K02516+K12812+K12812+K12812+K13217+K13108+K12737+K12879+K12822+K12598+K11086+K12821+K12837+K03283+K12897+K12859+K12622+K13099+K13199+K12626+K13123+K12875+…
Starch and sucrose metabolism	231	Munro_Bamboo_unigene_BMK_10235;Munro_Bamboo_unigene_BMK_10277;Munro_Bamboo_unigene_BMK_10278;Munro_Bamboo_unigene_BMK_10484;Munro_Bamboo_unigene_BMK_10912;Munro_Bamboo_unigene_BMK_10999;Munro_Bamboo_unigene_BMK_11371;Munro_Bamboo_unigene_BMK_12076;Munro_Bamboo_unigene_BMK_12112;Munro_Bamboo_unigene_BMK_12348;Munro_Bamboo_unigene_BMK_12349;Munro_Bamboo_unigene_BMK_124;Munro_Bamboo_unigene_BMK_1244…	K00697+K00696+K00696+K00963+K00975+K01193+K05350+K00844+K01087+K01810+K01810+K00705+K00963+K00700+K00975+K01179+K00705+K00703+K01188+K01179+K01051+K13648+K00695+K00696+K01087+K00696+K01179+K01193+K00770+K00696+K13648+K00975+K01176+K00703+K13648+K13648+K00696+K00012+K01176+K01194+K00963+K01810+K01810+K00695+K01051+K00703+K13648+K00703+K05350+K01188+K00695+K01051+K01188+K01187+K00703+K00703+K00703+…
Steroid biosynthesis	53	Munro_Bamboo_unigene_BMK_11874;Munro_Bamboo_unigene_BMK_12317;Munro_Bamboo_unigene_BMK_12471;Munro_Bamboo_unigene_BMK_12472;Munro_Bamboo_unigene_BMK_135;Munro_Bamboo_unigene_BMK_13772;Munro_Bamboo_unigene_BMK_18532;Munro_Bamboo_unigene_BMK_19214;Munro_Bamboo_unigene_BMK_19611;Munro_Bamboo_unigene_BMK_19936;Munro_Bamboo_unigene_BMK_19966;Munro_Bamboo_unigene_BMK_21383;Munro_Bamboo_unigene_BMK_2361…	K00227+K05917+K00559+K00559+K09828+K00222+K14424+K14424+K14424+K05917+K14423+K00511+K00222+K00222+K08246+K14674+K01824+K14674+K00559+K05917+K08242+K14674+K05917+K00213+K00227+K08246+K00511+K14423+K14423+K01824+K14423+K14674+K00511+K08246+K14424+K14674+K14674+K00801+K14424+K00801+K14423+K01853+K14423+K14423+K14674+K14423+K14424+K01853+K14423+K00559+K14674+K00801+K08242
Stilbenoid, diarylheptanoid and gingerol biosynthesis	27	Munro_Bamboo_unigene_BMK_25128;Munro_Bamboo_unigene_BMK_26906;Munro_Bamboo_unigene_BMK_27763;Munro_Bamboo_unigene_BMK_2903;Munro_Bamboo_unigene_BMK_29192;Munro_Bamboo_unigene_BMK_30745;Munro_Bamboo_unigene_BMK_32102;Munro_Bamboo_unigene_BMK_37719;Munro_Bamboo_unigene_BMK_39438;Munro_Bamboo_unigene_BMK_40693;Munro_Bamboo_unigene_BMK_45163;Munro_Bamboo_unigene_BMK_5107;Munro_Bamboo_unigene_BMK_5311…	K00487+K13065+K13065+K09754+K00588+K09754+K13065+K00487+K00517+K00487+K00517+K00517+K00487+K13065+K13065+K00517+K00487+K00517+K00517+K09754+K00487+K09754+K13065+K13065+K00487+K00487+K00517
Streptomycin biosynthesis	26	Munro_Bamboo_unigene_BMK_12076;Munro_Bamboo_unigene_BMK_31511;Munro_Bamboo_unigene_BMK_34959;Munro_Bamboo_unigene_BMK_3694;Munro_Bamboo_unigene_BMK_3790;Munro_Bamboo_unigene_BMK_40024;Munro_Bamboo_unigene_BMK_40353;Munro_Bamboo_unigene_BMK_41676;Munro_Bamboo_unigene_BMK_44383;Munro_Bamboo_unigene_BMK_45134;Munro_Bamboo_unigene_BMK_47768;Munro_Bamboo_unigene_BMK_51692;Munro_Bamboo_unigene_BMK_5186…	K00844+K00844+K00844+K01835+K01858+K00844+K00844+K00844+K01092+K00844+K00844+K00844+K00844+K01835+K00844+K00844+K00844+K00844+K00844+K00844+K00844+K01092+K00844+K00844+K00844+K01835
Styrene degradation	9	Munro_Bamboo_unigene_BMK_2403;Munro_Bamboo_unigene_BMK_26533;Munro_Bamboo_unigene_BMK_32144;Munro_Bamboo_unigene_BMK_3407;Munro_Bamboo_unigene_BMK_41274;Munro_Bamboo_unigene_BMK_4348;Munro_Bamboo_unigene_BMK_61117;Munro_Bamboo_unigene_BMK_66080;Munro_Bamboo_unigene_BMK_7807;	K01800+K01501+K01501+K01555+K00451+K01501+K01501+K00451+K00451
Sulfur metabolism	51	Munro_Bamboo_unigene_BMK_10804;Munro_Bamboo_unigene_BMK_11348;Munro_Bamboo_unigene_BMK_169;Munro_Bamboo_unigene_BMK_1704;Munro_Bamboo_unigene_BMK_17202;Munro_Bamboo_unigene_BMK_17310;Munro_Bamboo_unigene_BMK_1923;Munro_Bamboo_unigene_BMK_1924;Munro_Bamboo_unigene_BMK_20354;Munro_Bamboo_unigene_BMK_214;Munro_Bamboo_unigene_BMK_22023;Munro_Bamboo_unigene_BMK_22067;Munro_Bamboo_unigene_BMK_23303;Mun…	K01738+K00387+K13034+K01738+K00860+K00640+K00860+K00860+K00640+K01738+K00640+K01738+K01738+K01760+K01082+K01738+K00860+K01738+K01738+K01082+K01739+K01738+K01738+K00860+K00387+K01738+K01082+K01739+K01738+K01760+K00392+K13034+K00640+K01738+K00640+K01738+K01738+K01082+K13811+K13811+K01738+K00860+K01738+K00860+K01739+K13811+K01738+K00860+K00640+K00392+K13811
Sulfur relay system	32	Munro_Bamboo_unigene_BMK_10238;Munro_Bamboo_unigene_BMK_16485;Munro_Bamboo_unigene_BMK_1954;Munro_Bamboo_unigene_BMK_1955;Munro_Bamboo_unigene_BMK_22072;Munro_Bamboo_unigene_BMK_31836;Munro_Bamboo_unigene_BMK_32387;Munro_Bamboo_unigene_BMK_3283;Munro_Bamboo_unigene_BMK_3284;Munro_Bamboo_unigene_BMK_33084;Munro_Bamboo_unigene_BMK_33372;Munro_Bamboo_unigene_BMK_33903;Munro_Bamboo_unigene_BMK_34316;…	K04487+K01011+K00566+K00566+K00566+K03635+K03635+K14168+K14168+K11996+K14169+K01011+K00566+K01011+K04487+K00566+K03639+K00566+K11996+K01011+K00566+K01011+K04487+K01011+K11996+K04487+K01011+K14168+K12161+K00566+K03639+K14169
Synthesis and degradation of ketone bodies	14	Munro_Bamboo_unigene_BMK_1153;Munro_Bamboo_unigene_BMK_11805;Munro_Bamboo_unigene_BMK_24873;Munro_Bamboo_unigene_BMK_38125;Munro_Bamboo_unigene_BMK_39255;Munro_Bamboo_unigene_BMK_42697;Munro_Bamboo_unigene_BMK_42817;Munro_Bamboo_unigene_BMK_4702;Munro_Bamboo_unigene_BMK_48629;Munro_Bamboo_unigene_BMK_53812;Munro_Bamboo_unigene_BMK_57408;Munro_Bamboo_unigene_BMK_58550;Munro_Bamboo_unigene_BMK_6395…	K00626+K01641+K01640+K00626+K01640+K00626+K01640+K01641+K01640+K01641+K01640+K00626+K01641+K00626
Systemic lupus erythematosus	90	Munro_Bamboo_unigene_BMK_12195;Munro_Bamboo_unigene_BMK_12196;Munro_Bamboo_unigene_BMK_12197;Munro_Bamboo_unigene_BMK_12199;Munro_Bamboo_unigene_BMK_12200;Munro_Bamboo_unigene_BMK_13340;Munro_Bamboo_unigene_BMK_1387;Munro_Bamboo_unigene_BMK_1388;Munro_Bamboo_unigene_BMK_14388;Munro_Bamboo_unigene_BMK_14587;Munro_Bamboo_unigene_BMK_15112;Munro_Bamboo_unigene_BMK_15166;Munro_Bamboo_unigene_BMK_1521…	K11252+K11252+K11252+K11252+K11252+K11086+K11251+K11251+K11251+K11254+K11087+K11252+K11251+K11251+K11251+K11251+K11251+K11253+K11251+K11253+K11251+K11254+K11252+K11251+K11251+K11087+K11251+K11252+K11251+K11251+K11251+K11251+K11251+K11251+K11251+K11251+K11251+K11254+K11251+K11251+K11254+K11251+K11254+K11254+K11254+K11251+K11251+K11251+K11251+K11251+K11253+K11253+K11253+K11253+K11251+K11251+K11253+…
T cell receptor signaling pathway	29	Munro_Bamboo_unigene_BMK_10992;Munro_Bamboo_unigene_BMK_12388;Munro_Bamboo_unigene_BMK_15796;Munro_Bamboo_unigene_BMK_17186;Munro_Bamboo_unigene_BMK_19398;Munro_Bamboo_unigene_BMK_24620;Munro_Bamboo_unigene_BMK_25793;Munro_Bamboo_unigene_BMK_27108;Munro_Bamboo_unigene_BMK_27565;Munro_Bamboo_unigene_BMK_27877;Munro_Bamboo_unigene_BMK_31480;Munro_Bamboo_unigene_BMK_31491;Munro_Bamboo_unigene_BMK_34…	K04371+K06268+K04368+K04371+K06268+K04371+K04371+K04371+K04371+K06268+K03083+K04371+K06268+K06268+K06268+K03083+K03083+K04371+K04371+K04371+K04368+K04368+K06268+K06268+K04371+K06268+K06268+K06268+K04371
TGF-beta signaling pathway	70	Munro_Bamboo_unigene_BMK_10642;Munro_Bamboo_unigene_BMK_10992;Munro_Bamboo_unigene_BMK_11693;Munro_Bamboo_unigene_BMK_14854;Munro_Bamboo_unigene_BMK_16753;Munro_Bamboo_unigene_BMK_17186;Munro_Bamboo_unigene_BMK_1792;Munro_Bamboo_unigene_BMK_19223;Munro_Bamboo_unigene_BMK_19954;Munro_Bamboo_unigene_BMK_20871;Munro_Bamboo_unigene_BMK_20917;Munro_Bamboo_unigene_BMK_23193;Munro_Bamboo_unigene_BMK_238…	K04681+K04371+K04382+K04498+K03094+K04371+K04498+K04498+K04498+K03456+K04382+K03347+K04498+K04498+K04371+K04371+K03094+K04382+K04371+K04681+K04371+K03347+K03456+K04382+K04498+K04371+K04498+K03094+K03094+K03094+K03868+K03456+K03456+K03347+K03094+K03868+K04683+K04498+K04498+K04382+K03094+K04498+K04498+K04382+K04683+K04498+K03094+K04371+K04371+K04371+K03094+K04498+K04498+K04382+K04498+K04371+K04498+…
Taste transduction	1	Munro_Bamboo_unigene_BMK_56204;	K04536
Taurine and hypotaurine metabolism	34	Munro_Bamboo_unigene_BMK_16805;Munro_Bamboo_unigene_BMK_20032;Munro_Bamboo_unigene_BMK_2386;Munro_Bamboo_unigene_BMK_24568;Munro_Bamboo_unigene_BMK_26260;Munro_Bamboo_unigene_BMK_27186;Munro_Bamboo_unigene_BMK_3051;Munro_Bamboo_unigene_BMK_3052;Munro_Bamboo_unigene_BMK_31375;Munro_Bamboo_unigene_BMK_36963;Munro_Bamboo_unigene_BMK_37749;Munro_Bamboo_unigene_BMK_38942;Munro_Bamboo_unigene_BMK_39424…	K00681+K10712+K10712+K00681+K10712+K00681+K01580+K01580+K10712+K00681+K00681+K10712+K01580+K10712+K10712+K01580+K01580+K01580+K00681+K01580+K10712+K10712+K10712+K10712+K10712+K10712+K10712+K01580+K01580+K01580+K01580+K00681+K01580+K01580
Terpenoid backbone biosynthesis	73	Munro_Bamboo_unigene_BMK_10312;Munro_Bamboo_unigene_BMK_1153;Munro_Bamboo_unigene_BMK_11805;Munro_Bamboo_unigene_BMK_12036;Munro_Bamboo_unigene_BMK_14022;Munro_Bamboo_unigene_BMK_15125;Munro_Bamboo_unigene_BMK_15955;Munro_Bamboo_unigene_BMK_17353;Munro_Bamboo_unigene_BMK_2144;Munro_Bamboo_unigene_BMK_21698;Munro_Bamboo_unigene_BMK_22490;Munro_Bamboo_unigene_BMK_23348;Munro_Bamboo_unigene_BMK_2371…	K03526+K00626+K01641+K05356+K00869+K01662+K14066+K11778+K00991+K10960+K11778+K03527+K11778+K11778+K14066+K14066+K01662+K00919+K11778+K00787+K00099+K11778+K11778+K13789+K00869+K00626+K03527+K11778+K10960+K00626+K00787+K00787+K00021+K13789+K05356+K03527+K13789+K01641+K03527+K00021+K00869+K10960+K00787+K01770+K00787+K00787+K13789+K10960+K00919+K01641+K00021+K00787+K11778+K03527+K00938+K00626+K00869+…
Thiamine metabolism	14	Munro_Bamboo_unigene_BMK_10238;Munro_Bamboo_unigene_BMK_11366;Munro_Bamboo_unigene_BMK_11542;Munro_Bamboo_unigene_BMK_13857;Munro_Bamboo_unigene_BMK_28728;Munro_Bamboo_unigene_BMK_33266;Munro_Bamboo_unigene_BMK_36162;Munro_Bamboo_unigene_BMK_39797;Munro_Bamboo_unigene_BMK_41431;Munro_Bamboo_unigene_BMK_4396;Munro_Bamboo_unigene_BMK_47269;Munro_Bamboo_unigene_BMK_49352;Munro_Bamboo_unigene_BMK_562…	K04487+K03147+K11717+K00949+K14153+K14153+K00878+K04487+K00949+K00949+K04487+K00949+K04487+K00949
Thyroid cancer	20	Munro_Bamboo_unigene_BMK_10992;Munro_Bamboo_unigene_BMK_15796;Munro_Bamboo_unigene_BMK_17186;Munro_Bamboo_unigene_BMK_24620;Munro_Bamboo_unigene_BMK_25793;Munro_Bamboo_unigene_BMK_27108;Munro_Bamboo_unigene_BMK_27565;Munro_Bamboo_unigene_BMK_31491;Munro_Bamboo_unigene_BMK_33522;Munro_Bamboo_unigene_BMK_5118;Munro_Bamboo_unigene_BMK_5119;Munro_Bamboo_unigene_BMK_51698;Munro_Bamboo_unigene_BMK_5697…	K04371+K04368+K04371+K04371+K04371+K04371+K04371+K04371+K09291+K04371+K04371+K04371+K04368+K04368+K04371+K09291+K09291+K09291+K09291+K04371
Tight junction	56	Munro_Bamboo_unigene_BMK_10230;Munro_Bamboo_unigene_BMK_1025;Munro_Bamboo_unigene_BMK_11693;Munro_Bamboo_unigene_BMK_12168;Munro_Bamboo_unigene_BMK_12169;Munro_Bamboo_unigene_BMK_14648;Munro_Bamboo_unigene_BMK_16939;Munro_Bamboo_unigene_BMK_19076;Munro_Bamboo_unigene_BMK_20362;Munro_Bamboo_unigene_BMK_20871;Munro_Bamboo_unigene_BMK_2090;Munro_Bamboo_unigene_BMK_20917;Munro_Bamboo_unigene_BMK_2196…	K03115+K06100+K04382+K03097+K03097+K06100+K06100+K06111+K06100+K03456+K03097+K04382+K03115+K06100+K03097+K06100+K06100+K10352+K04382+K06100+K03097+K03456+K04382+K06111+K04354+K04354+K06111+K04354+K03456+K03456+K03115+K03115+K04382+K04382+K06100+K03115+K06100+K03097+K06111+K06111+K04382+K06100+K06100+K06100+K06111+K06100+K06100+K06100+K06100+K05692+K06100+K04382+K04382+K01110+K04354+K04354
Toll-like receptor signaling pathway	38	Munro_Bamboo_unigene_BMK_10992;Munro_Bamboo_unigene_BMK_12381;Munro_Bamboo_unigene_BMK_15446;Munro_Bamboo_unigene_BMK_15508;Munro_Bamboo_unigene_BMK_15796;Munro_Bamboo_unigene_BMK_17186;Munro_Bamboo_unigene_BMK_18311;Munro_Bamboo_unigene_BMK_20285;Munro_Bamboo_unigene_BMK_21706;Munro_Bamboo_unigene_BMK_24620;Munro_Bamboo_unigene_BMK_24621;Munro_Bamboo_unigene_BMK_24961;Munro_Bamboo_unigene_BMK_25…	K04371+K04392+K04392+K04392+K04368+K04371+K04392+K04392+K04392+K04371+K04392+K04392+K04371+K04392+K04392+K04392+K04371+K04392+K04371+K04392+K04392+K04371+K04392+K04392+K04392+K04371+K04371+K04371+K04392+K04368+K04368+K04371+K04392+K04392+K04392+K05399+K04733+K04371
Toluene degradation	3	Munro_Bamboo_unigene_BMK_23247;Munro_Bamboo_unigene_BMK_27062;Munro_Bamboo_unigene_BMK_3882;	K01061+K01061+K01061
Toxoplasmosis	76	Munro_Bamboo_unigene_BMK_10847;Munro_Bamboo_unigene_BMK_10992;Munro_Bamboo_unigene_BMK_12315;Munro_Bamboo_unigene_BMK_13534;Munro_Bamboo_unigene_BMK_15555;Munro_Bamboo_unigene_BMK_165;Munro_Bamboo_unigene_BMK_166;Munro_Bamboo_unigene_BMK_167;Munro_Bamboo_unigene_BMK_168;Munro_Bamboo_unigene_BMK_17186;Munro_Bamboo_unigene_BMK_17386;Munro_Bamboo_unigene_BMK_18881;Munro_Bamboo_unigene_BMK_19682;Munr…	K03283+K04371+K03283+K03283+K03283+K13412+K13412+K13412+K13412+K04371+K13412+K13412+K13412+K03283+K03283+K01047+K03283+K13412+K04371+K03283+K04371+K01047+K13412+K04371+K03283+K13412+K03283+K04371+K13412+K03283+K03283+K13412+K03283+K01047+K13412+K03283+K04371+K03283+K03283+K03283+K13412+K03283+K13412+K13412+K03283+K13412+K13412+K13412+K13412+K08738+K03283+K13412+K13412+K13412+K13412+K03283+K04371+…
Transcription factors	348	Munro_Bamboo_unigene_BMK_10151;Munro_Bamboo_unigene_BMK_1030;Munro_Bamboo_unigene_BMK_10635;Munro_Bamboo_unigene_BMK_10642;Munro_Bamboo_unigene_BMK_1145;Munro_Bamboo_unigene_BMK_11587;Munro_Bamboo_unigene_BMK_11588;Munro_Bamboo_unigene_BMK_11652;Munro_Bamboo_unigene_BMK_11842;Munro_Bamboo_unigene_BMK_11845;Munro_Bamboo_unigene_BMK_11848;Munro_Bamboo_unigene_BMK_11849;Munro_Bamboo_unigene_BMK_1185…	K09422+K09422+K09422+K04681+K14431+K03120+K03120+K09422+K09422+K09422+K08064+K08064+K08064+K09250+K09250+K14432+K14432+K09422+K09313+K09313+K09313+K09286+K09286+K09422+K09422+K09264+K09186+K14432+K09422+K14432+K09422+K07466+K14431+K09422+K14432+K09422+K04498+K09422+K09377+K09422+K09422+K07466+K09264+K09422+K09422+K07735+K09422+K09422+K09286+K09422+K09286+K14432+K09377+K09060+K09264+K09422+K04498+…
Translation factors	172	Munro_Bamboo_unigene_BMK_10067;Munro_Bamboo_unigene_BMK_10354;Munro_Bamboo_unigene_BMK_10856;Munro_Bamboo_unigene_BMK_10927;Munro_Bamboo_unigene_BMK_10932;Munro_Bamboo_unigene_BMK_10935;Munro_Bamboo_unigene_BMK_10979;Munro_Bamboo_unigene_BMK_11111;Munro_Bamboo_unigene_BMK_113;Munro_Bamboo_unigene_BMK_114;Munro_Bamboo_unigene_BMK_11410;Munro_Bamboo_unigene_BMK_11972;Munro_Bamboo_unigene_BMK_11973;…	K03240+K02519+K03260+K03260+K03260+K03260+K03260+K03238+K03257+K03257+K03246+K03263+K03263+K03242+K03262+K03231+K03262+K02519+K03260+K02519+K02519+K02836+K03263+K02519+K02835+K03265+K13025+K03234+K02355+K03243+K03680+K03234+K03231+K03259+K03234+K03113+K03262+K03257+K03265+K03265+K03265+K02519+K03243+K03234+K03234+K03234+K03253+K03232+K03234+K03234+K03267+K02836+K02836+K03234+K03233+K03234+K03257+…
Transporters	63	Munro_Bamboo_unigene_BMK_10754;Munro_Bamboo_unigene_BMK_10755;Munro_Bamboo_unigene_BMK_10796;Munro_Bamboo_unigene_BMK_10917;Munro_Bamboo_unigene_BMK_13245;Munro_Bamboo_unigene_BMK_14159;Munro_Bamboo_unigene_BMK_14347;Munro_Bamboo_unigene_BMK_15002;Munro_Bamboo_unigene_BMK_17206;Munro_Bamboo_unigene_BMK_18278;Munro_Bamboo_unigene_BMK_18521;Munro_Bamboo_unigene_BMK_18931;Munro_Bamboo_unigene_BMK_19…	K05658+K05658+K05658+K09013+K05674+K08150+K08176+K05658+K08176+K08176+K05658+K05658+K08150+K13783+K08176+K08150+K05658+K13783+K08176+K08176+K05658+K05658+K05658+K05674+K05658+K02021+K08176+K02069+K08176+K08150+K08150+K08176+K05658+K05658+K08202+K02065+K02021+K02069+K08176+K05658+K08176+K02429+K08176+K05658+K05674+K08176+K08176+K05658+K05658+K08150+K08150+K08176+K05658+K05674+K05658+K05658+K05658+…
Tropane, piperidine and pyridine alkaloid biosynthesis	16	Munro_Bamboo_unigene_BMK_10820;Munro_Bamboo_unigene_BMK_12456;Munro_Bamboo_unigene_BMK_13568;Munro_Bamboo_unigene_BMK_21019;Munro_Bamboo_unigene_BMK_21772;Munro_Bamboo_unigene_BMK_22675;Munro_Bamboo_unigene_BMK_30293;Munro_Bamboo_unigene_BMK_40569;Munro_Bamboo_unigene_BMK_47698;Munro_Bamboo_unigene_BMK_52140;Munro_Bamboo_unigene_BMK_60370;Munro_Bamboo_unigene_BMK_62400;Munro_Bamboo_unigene_BMK_63…	K00815+K00276+K08081+K00813+K00817+K00815+K00817+K00813+K00815+K00815+K00813+K00276+K08081+K00276+K00815+K08081
Tryptophan metabolism	39	Munro_Bamboo_unigene_BMK_10318;Munro_Bamboo_unigene_BMK_11032;Munro_Bamboo_unigene_BMK_1153;Munro_Bamboo_unigene_BMK_12096;Munro_Bamboo_unigene_BMK_12377;Munro_Bamboo_unigene_BMK_13176;Munro_Bamboo_unigene_BMK_17641;Munro_Bamboo_unigene_BMK_19825;Munro_Bamboo_unigene_BMK_20762;Munro_Bamboo_unigene_BMK_26533;Munro_Bamboo_unigene_BMK_26730;Munro_Bamboo_unigene_BMK_2724;Munro_Bamboo_unigene_BMK_2727…	K01867+K00128+K00626+K14085+K00128+K00128+K00128+K14085+K03781+K01501+K01692+K03781+K00128+K00164+K11817+K03781+K01501+K00164+K00128+K11817+K00626+K03781+K00626+K01501+K03781+K00128+K00128+K00626+K00128+K01692+K00128+K01501+K00128+K14085+K03781+K03781+K00626+K01692+K01692
Two-component system	15	Munro_Bamboo_unigene_BMK_1153;Munro_Bamboo_unigene_BMK_12323;Munro_Bamboo_unigene_BMK_1260;Munro_Bamboo_unigene_BMK_20331;Munro_Bamboo_unigene_BMK_22160;Munro_Bamboo_unigene_BMK_23082;Munro_Bamboo_unigene_BMK_23439;Munro_Bamboo_unigene_BMK_3370;Munro_Bamboo_unigene_BMK_38125;Munro_Bamboo_unigene_BMK_42697;Munro_Bamboo_unigene_BMK_51655;Munro_Bamboo_unigene_BMK_52236;Munro_Bamboo_unigene_BMK_58550…	K00626+K01915+K01915+K01113+K02259+K01915+K01113+K01915+K00626+K00626+K01113+K01113+K00626+K10255+K00626
Type I diabetes mellitus	24	Munro_Bamboo_unigene_BMK_14611;Munro_Bamboo_unigene_BMK_24449;Munro_Bamboo_unigene_BMK_29838;Munro_Bamboo_unigene_BMK_2986;Munro_Bamboo_unigene_BMK_2987;Munro_Bamboo_unigene_BMK_2988;Munro_Bamboo_unigene_BMK_3051;Munro_Bamboo_unigene_BMK_3052;Munro_Bamboo_unigene_BMK_31178;Munro_Bamboo_unigene_BMK_33116;Munro_Bamboo_unigene_BMK_345;Munro_Bamboo_unigene_BMK_39424;Munro_Bamboo_unigene_BMK_44347;Mun…	K04077+K04077+K04077+K04077+K04077+K04077+K01580+K01580+K04077+K04077+K04077+K01580+K01580+K01580+K01580+K01580+K04077+K04077+K01580+K01580+K01580+K01580+K01580+K01580
Type II diabetes mellitus	53	Munro_Bamboo_unigene_BMK_10992;Munro_Bamboo_unigene_BMK_12076;Munro_Bamboo_unigene_BMK_13872;Munro_Bamboo_unigene_BMK_16300;Munro_Bamboo_unigene_BMK_17186;Munro_Bamboo_unigene_BMK_24620;Munro_Bamboo_unigene_BMK_25793;Munro_Bamboo_unigene_BMK_27108;Munro_Bamboo_unigene_BMK_27565;Munro_Bamboo_unigene_BMK_29096;Munro_Bamboo_unigene_BMK_31491;Munro_Bamboo_unigene_BMK_31511;Munro_Bamboo_unigene_BMK_32…	K04371+K00844+K07203+K00873+K04371+K04371+K04371+K04371+K04371+K07595+K04371+K00844+K00873+K00844+K00873+K00844+K00873+K00844+K00873+K00844+K07203+K00844+K07203+K00844+K00873+K04371+K04371+K00844+K04371+K00844+K07203+K07203+K07203+K00844+K00873+K00844+K07203+K00844+K00844+K04371+K00844+K07203+K07203+K00844+K07203+K00844+K00844+K00873+K00844+K00844+K00873+K04371+K00873
Tyrosine metabolism	48	Munro_Bamboo_unigene_BMK_10169;Munro_Bamboo_unigene_BMK_10820;Munro_Bamboo_unigene_BMK_10998;Munro_Bamboo_unigene_BMK_11066;Munro_Bamboo_unigene_BMK_11088;Munro_Bamboo_unigene_BMK_12456;Munro_Bamboo_unigene_BMK_13876;Munro_Bamboo_unigene_BMK_14015;Munro_Bamboo_unigene_BMK_162;Munro_Bamboo_unigene_BMK_1975;Munro_Bamboo_unigene_BMK_21019;Munro_Bamboo_unigene_BMK_21772;Munro_Bamboo_unigene_BMK_22675…	K14455+K00815+K00457+K00001+K00001+K00276+K01592+K00001+K00135+K00001+K00813+K00817+K00815+K01800+K00001+K00001+K00121+K00599+K00817+K00001+K01555+K00001+K00001+K00001+K00121+K00001+K00813+K00451+K00599+K00815+K00121+K00001+K00001+K00815+K00001+K00457+K00121+K00813+K00276+K01592+K00121+K00276+K00451+K00599+K00599+K00599+K00815+K00451
Ubiquinone and other terpenoid-quinone biosynthesis	44	Munro_Bamboo_unigene_BMK_10820;Munro_Bamboo_unigene_BMK_10998;Munro_Bamboo_unigene_BMK_11603;Munro_Bamboo_unigene_BMK_11831;Munro_Bamboo_unigene_BMK_11986;Munro_Bamboo_unigene_BMK_12837;Munro_Bamboo_unigene_BMK_14198;Munro_Bamboo_unigene_BMK_16353;Munro_Bamboo_unigene_BMK_17193;Munro_Bamboo_unigene_BMK_18615;Munro_Bamboo_unigene_BMK_20767;Munro_Bamboo_unigene_BMK_22675;Munro_Bamboo_unigene_BMK_26…	K00815+K00457+K05928+K06127+K01904+K12501+K12501+K01904+K06125+K12501+K12501+K00815+K01904+K01904+K01904+K01904+K12501+K01904+K02548+K01904+K01904+K00815+K06127+K12502+K01904+K00815+K01904+K12501+K01904+K06127+K06125+K00457+K01904+K02548+K00591+K02548+K12501+K00815+K06125+K09834+K06126+K06127+K06127+K09833
Ubiquitin mediated proteolysis	230	Munro_Bamboo_unigene_BMK_10000;Munro_Bamboo_unigene_BMK_10236;Munro_Bamboo_unigene_BMK_10297;Munro_Bamboo_unigene_BMK_10299;Munro_Bamboo_unigene_BMK_10300;Munro_Bamboo_unigene_BMK_10301;Munro_Bamboo_unigene_BMK_11255;Munro_Bamboo_unigene_BMK_11256;Munro_Bamboo_unigene_BMK_11257;Munro_Bamboo_unigene_BMK_11480;Munro_Bamboo_unigene_BMK_11507;Munro_Bamboo_unigene_BMK_12287;Munro_Bamboo_unigene_BMK_12…	K10601+K03349+K10590+K10590+K10590+K10590+K10609+K10609+K03869+K10589+K10144+K10580+K10580+K10576+K03178+K03348+K04506+K10609+K03348+K03869+K10576+K09561+K10588+K10592+K04506+K03178+K03354+K03094+K10598+K10610+K06689+K10590+K10610+K03357+K04554+K10590+K10590+K04649+K10688+K06689+K10592+K10592+K10144+K03351+K10599+K03348+K10588+K04506+K10592+K10590+K03178+K10590+K10598+K03347+K04554+K10592+K10589+…
Ubiquitin system	512	Munro_Bamboo_unigene_BMK_10000;Munro_Bamboo_unigene_BMK_10131;Munro_Bamboo_unigene_BMK_10203;Munro_Bamboo_unigene_BMK_10225;Munro_Bamboo_unigene_BMK_10236;Munro_Bamboo_unigene_BMK_1027;Munro_Bamboo_unigene_BMK_1028;Munro_Bamboo_unigene_BMK_10296;Munro_Bamboo_unigene_BMK_10297;Munro_Bamboo_unigene_BMK_10299;Munro_Bamboo_unigene_BMK_10300;Munro_Bamboo_unigene_BMK_10301;Munro_Bamboo_unigene_BMK_1072…	K10601+K11801+K10290+K05610+K03349+K04482+K04482+K12176+K10590+K10590+K10590+K10590+K11851+K10632+K05610+K05610+K11866+K10609+K10609+K03869+K11838+K08592+K10589+K10144+K10295+K11836+K11836+K11836+K11855+K11855+K11855+K11838+K10580+K10580+K10576+K10695+K08341+K08341+K08341+K11835+K03178+K03348+K10666+K04506+K10609+K03348+K12169+K11835+K11971+K11982+K11844+K10640+K11855+K11835+K11835+K03869+K10576+…
VEGF signaling pathway	54	Munro_Bamboo_unigene_BMK_10992;Munro_Bamboo_unigene_BMK_12381;Munro_Bamboo_unigene_BMK_12388;Munro_Bamboo_unigene_BMK_15446;Munro_Bamboo_unigene_BMK_15508;Munro_Bamboo_unigene_BMK_15796;Munro_Bamboo_unigene_BMK_17186;Munro_Bamboo_unigene_BMK_18311;Munro_Bamboo_unigene_BMK_19398;Munro_Bamboo_unigene_BMK_20285;Munro_Bamboo_unigene_BMK_21706;Munro_Bamboo_unigene_BMK_21953;Munro_Bamboo_unigene_BMK_22…	K04371+K04392+K06268+K04392+K04392+K04368+K04371+K04392+K06268+K04392+K04392+K01047+K04718+K04371+K04392+K04392+K04371+K01047+K04392+K04392+K04392+K04371+K04392+K04371+K04392+K06268+K01047+K04392+K04371+K06268+K06268+K04392+K06268+K04392+K04392+K04371+K04371+K04371+K04392+K04368+K04368+K01047+K06268+K06268+K04371+K01047+K04392+K01047+K06268+K06268+K04392+K06268+K04392+K04371
Valine, leucine and isoleucine biosynthesis	64	Munro_Bamboo_unigene_BMK_10289;Munro_Bamboo_unigene_BMK_10290;Munro_Bamboo_unigene_BMK_11703;Munro_Bamboo_unigene_BMK_11704;Munro_Bamboo_unigene_BMK_11705;Munro_Bamboo_unigene_BMK_11913;Munro_Bamboo_unigene_BMK_12441;Munro_Bamboo_unigene_BMK_13515;Munro_Bamboo_unigene_BMK_1444;Munro_Bamboo_unigene_BMK_16052;Munro_Bamboo_unigene_BMK_17739;Munro_Bamboo_unigene_BMK_19340;Munro_Bamboo_unigene_BMK_207…	K00162+K00162+K01873+K01873+K01873+K00161+K01869+K01649+K00826+K00161+K01869+K01869+K00826+K01869+K00053+K00053+K00826+K00826+K00826+K00826+K01649+K00161+K01652+K00826+K01652+K01704+K01873+K00162+K01873+K00052+K00826+K01869+K00826+K00052+K00826+K00053+K01869+K01653+K00161+K01869+K01869+K01869+K01869+K01869+K01869+K01873+K01649+K01870+K01649+K00161+K00826+K01687+K01703+K00053+K00826+K01873+K00161+…
Valine, leucine and isoleucine degradation	83	Munro_Bamboo_unigene_BMK_10263;Munro_Bamboo_unigene_BMK_10989;Munro_Bamboo_unigene_BMK_11032;Munro_Bamboo_unigene_BMK_11252;Munro_Bamboo_unigene_BMK_1153;Munro_Bamboo_unigene_BMK_11805;Munro_Bamboo_unigene_BMK_12096;Munro_Bamboo_unigene_BMK_12249;Munro_Bamboo_unigene_BMK_12377;Munro_Bamboo_unigene_BMK_13176;Munro_Bamboo_unigene_BMK_1444;Munro_Bamboo_unigene_BMK_15373;Munro_Bamboo_unigene_BMK_1628…	K05605+K00166+K00128+K00382+K00626+K01641+K14085+K00020+K00128+K00128+K00826+K00382+K01968+K00128+K00249+K01969+K01968+K14085+K00382+K00826+K00382+K00249+K00249+K09699+K00826+K00826+K01640+K05607+K00826+K00382+K00826+K01692+K00128+K00020+K01968+K00826+K01968+K00020+K00140+K00128+K00626+K00167+K01640+K00826+K07513+K00382+K00626+K01640+K00826+K00826+K01641+K01640+K00253+K07513+K00249+K05605+K05607+…
Various types of N-glycan biosynthesis	63	Munro_Bamboo_unigene_BMK_1018;Munro_Bamboo_unigene_BMK_11676;Munro_Bamboo_unigene_BMK_11995;Munro_Bamboo_unigene_BMK_12417;Munro_Bamboo_unigene_BMK_12848;Munro_Bamboo_unigene_BMK_13040;Munro_Bamboo_unigene_BMK_1420;Munro_Bamboo_unigene_BMK_1421;Munro_Bamboo_unigene_BMK_14441;Munro_Bamboo_unigene_BMK_15417;Munro_Bamboo_unigene_BMK_18375;Munro_Bamboo_unigene_BMK_18779;Munro_Bamboo_unigene_BMK_20075…	K03847+K03846+K03843+K00726+K05531+K03844+K01230+K01230+K01230+K01230+K14412+K14413+K03714+K00753+K12668+K01230+K03714+K14413+K07432+K01231+K07151+K07151+K14412+K03844+K01231+K07441+K03847+K03845+K07432+K12666+K07151+K03842+K01230+K14413+K00736+K00753+K07151+K01231+K05531+K07151+K01231+K01231+K03847+K01231+K03842+K12666+K00753+K14413+K03845+K01231+K12670+K03844+K07151+K07151+K07151+K07151+K07151+…
Vascular smooth muscle contraction	32	Munro_Bamboo_unigene_BMK_10992;Munro_Bamboo_unigene_BMK_15796;Munro_Bamboo_unigene_BMK_17186;Munro_Bamboo_unigene_BMK_18672;Munro_Bamboo_unigene_BMK_21953;Munro_Bamboo_unigene_BMK_24620;Munro_Bamboo_unigene_BMK_25793;Munro_Bamboo_unigene_BMK_25812;Munro_Bamboo_unigene_BMK_27108;Munro_Bamboo_unigene_BMK_27565;Munro_Bamboo_unigene_BMK_28144;Munro_Bamboo_unigene_BMK_29419;Munro_Bamboo_unigene_BMK_31…	K04371+K04368+K04371+K02183+K01047+K04371+K04371+K01047+K04371+K04371+K06269+K01047+K04371+K06269+K02183+K02183+K06269+K06269+K06269+K06269+K02183+K04371+K04371+K04371+K04368+K04368+K01047+K02183+K04371+K01047+K01047+K04371
Vasopressin-regulated water reabsorption	7	Munro_Bamboo_unigene_BMK_11877;Munro_Bamboo_unigene_BMK_11878;Munro_Bamboo_unigene_BMK_1370;Munro_Bamboo_unigene_BMK_17321;Munro_Bamboo_unigene_BMK_32461;Munro_Bamboo_unigene_BMK_39180;Munro_Bamboo_unigene_BMK_58831;	K10418+K10418+K07887+K06027+K07887+K06027+K10418
Vibrio cholerae infection	76	Munro_Bamboo_unigene_BMK_10869;Munro_Bamboo_unigene_BMK_10871;Munro_Bamboo_unigene_BMK_13178;Munro_Bamboo_unigene_BMK_14778;Munro_Bamboo_unigene_BMK_15608;Munro_Bamboo_unigene_BMK_20993;Munro_Bamboo_unigene_BMK_22303;Munro_Bamboo_unigene_BMK_24835;Munro_Bamboo_unigene_BMK_26028;Munro_Bamboo_unigene_BMK_27614;Munro_Bamboo_unigene_BMK_28188;Munro_Bamboo_unigene_BMK_29473;Munro_Bamboo_unigene_BMK_30…	K02150+K02150+K07342+K10956+K02147+K02150+K02152+K02155+K02147+K02155+K02154+K02151+K02148+K02154+K02155+K02155+K02155+K02155+K02155+K02155+K02155+K02155+K02155+K07342+K02148+K02154+K02150+K02150+K07342+K09481+K02154+K02145+K02145+K02144+K10949+K02155+K02150+K02147+K02151+K09481+K10956+K02154+K02155+K02154+K02152+K02154+K10956+K02155+K02149+K10956+K02154+K02146+K10956+K02154+K02155+K02155+K02147+…
Viral myocarditis	37	Munro_Bamboo_unigene_BMK_10856;Munro_Bamboo_unigene_BMK_10927;Munro_Bamboo_unigene_BMK_10932;Munro_Bamboo_unigene_BMK_10935;Munro_Bamboo_unigene_BMK_10979;Munro_Bamboo_unigene_BMK_12381;Munro_Bamboo_unigene_BMK_13640;Munro_Bamboo_unigene_BMK_15446;Munro_Bamboo_unigene_BMK_15508;Munro_Bamboo_unigene_BMK_18311;Munro_Bamboo_unigene_BMK_20285;Munro_Bamboo_unigene_BMK_21706;Munro_Bamboo_unigene_BMK_24…	K03260+K03260+K03260+K03260+K03260+K04392+K03260+K04392+K04392+K04392+K04392+K04392+K04392+K04392+K10352+K04392+K04392+K04392+K04392+K04392+K04392+K04392+K08738+K04392+K04392+K08738+K04392+K03260+K08738+K04392+K03260+K04392+K04392+K05692+K03260+K03260+K03260
Vitamin B6 metabolism	15	Munro_Bamboo_unigene_BMK_11553;Munro_Bamboo_unigene_BMK_11554;Munro_Bamboo_unigene_BMK_11555;Munro_Bamboo_unigene_BMK_12573;Munro_Bamboo_unigene_BMK_12605;Munro_Bamboo_unigene_BMK_13256;Munro_Bamboo_unigene_BMK_13886;Munro_Bamboo_unigene_BMK_15466;Munro_Bamboo_unigene_BMK_1563;Munro_Bamboo_unigene_BMK_35434;Munro_Bamboo_unigene_BMK_52450;Munro_Bamboo_unigene_BMK_54543;Munro_Bamboo_unigene_BMK_571…	K00868+K00868+K00868+K01733+K06215+K06215+K01733+K01733+K08681+K08681+K00831+K01733+K00868+K01733+K06215
Vitamin digestion and absorption	1	Munro_Bamboo_unigene_BMK_41688;	K14617
Wnt signaling pathway	139	Munro_Bamboo_unigene_BMK_10230;Munro_Bamboo_unigene_BMK_11693;Munro_Bamboo_unigene_BMK_1173;Munro_Bamboo_unigene_BMK_11800;Munro_Bamboo_unigene_BMK_12168;Munro_Bamboo_unigene_BMK_12169;Munro_Bamboo_unigene_BMK_12381;Munro_Bamboo_unigene_BMK_12388;Munro_Bamboo_unigene_BMK_12398;Munro_Bamboo_unigene_BMK_12399;Munro_Bamboo_unigene_BMK_12400;Munro_Bamboo_unigene_BMK_13380;Munro_Bamboo_unigene_BMK_148…	K03115+K04382+K11584+K11584+K03097+K03097+K04392+K06268+K04507+K04507+K04507+K04506+K04498+K11584+K04392+K04392+K04506+K03094+K04498+K04392+K04498+K06268+K04498+K04392+K03456+K03097+K04382+K04506+K04392+K03115+K03347+K04498+K03097+K04498+K04392+K04392+K04506+K11584+K04392+K03094+K04392+K04382+K04392+K04392+K04392+K04506+K06268+K03347+K04506+K03097+K11584+K03456+K04382+K04392+K04498+K03083+K04498+…
Zeatin biosynthesis	14	Munro_Bamboo_unigene_BMK_18855;Munro_Bamboo_unigene_BMK_23049;Munro_Bamboo_unigene_BMK_32240;Munro_Bamboo_unigene_BMK_37413;Munro_Bamboo_unigene_BMK_40469;Munro_Bamboo_unigene_BMK_41976;Munro_Bamboo_unigene_BMK_42248;Munro_Bamboo_unigene_BMK_51165;Munro_Bamboo_unigene_BMK_53350;Munro_Bamboo_unigene_BMK_55368;Munro_Bamboo_unigene_BMK_58114;Munro_Bamboo_unigene_BMK_61517;Munro_Bamboo_unigene_BMK_64…	K00279+K00279+K00791+K00279+K00279+K13495+K00791+K00791+K00791+K00279+K00791+K00279+K00279+K00791
alpha-Linolenic acid metabolism	57	Munro_Bamboo_unigene_BMK_10503;Munro_Bamboo_unigene_BMK_11107;Munro_Bamboo_unigene_BMK_11438;Munro_Bamboo_unigene_BMK_14130;Munro_Bamboo_unigene_BMK_16122;Munro_Bamboo_unigene_BMK_18989;Munro_Bamboo_unigene_BMK_19561;Munro_Bamboo_unigene_BMK_2099;Munro_Bamboo_unigene_BMK_21953;Munro_Bamboo_unigene_BMK_22943;Munro_Bamboo_unigene_BMK_25052;Munro_Bamboo_unigene_BMK_25537;Munro_Bamboo_unigene_BMK_258…	K01723+K10527+K10527+K00232+K00232+K10525+K00232+K00454+K01047+K05894+K00454+K14674+K01047+K10527+K00454+K01047+K10526+K14674+K00454+K00232+K00232+K05894+K14674+K00232+K00454+K00454+K00232+K00454+K01723+K00454+K00232+K05894+K00454+K10526+K14674+K00454+K10526+K00232+K14674+K14674+K00454+K05894+K01047+K00232+K01047+K00454+K10526+K00454+K00454+K00454+K00232+K00454+K14674+K01047+K14674+K10528+K00232
beta-Alanine metabolism	62	Munro_Bamboo_unigene_BMK_10263;Munro_Bamboo_unigene_BMK_1045;Munro_Bamboo_unigene_BMK_11032;Munro_Bamboo_unigene_BMK_12096;Munro_Bamboo_unigene_BMK_12350;Munro_Bamboo_unigene_BMK_12377;Munro_Bamboo_unigene_BMK_12456;Munro_Bamboo_unigene_BMK_13176;Munro_Bamboo_unigene_BMK_17641;Munro_Bamboo_unigene_BMK_18406;Munro_Bamboo_unigene_BMK_19825;Munro_Bamboo_unigene_BMK_21434;Munro_Bamboo_unigene_BMK_223…	K05605+K01431+K00128+K14085+K00797+K00128+K00276+K00128+K00128+K00249+K14085+K00249+K01578+K00249+K01692+K00207+K00128+K01431+K01580+K01580+K00797+K00128+K01580+K01578+K01580+K01580+K01580+K01580+K00797+K00797+K00249+K05605+K00797+K01464+K01464+K00249+K01464+K00797+K00797+K00128+K00128+K01580+K00128+K01692+K00128+K01580+K00128+K00276+K01580+K05605+K00797+K00276+K01918+K01580+K14085+K01580+K01580+…
mRNA surveillance pathway	220	Munro_Bamboo_unigene_BMK_10080;Munro_Bamboo_unigene_BMK_10208;Munro_Bamboo_unigene_BMK_1025;Munro_Bamboo_unigene_BMK_10597;Munro_Bamboo_unigene_BMK_10629;Munro_Bamboo_unigene_BMK_11473;Munro_Bamboo_unigene_BMK_11693;Munro_Bamboo_unigene_BMK_1173;Munro_Bamboo_unigene_BMK_11800;Munro_Bamboo_unigene_BMK_11983;Munro_Bamboo_unigene_BMK_12179;Munro_Bamboo_unigene_BMK_12413;Munro_Bamboo_unigene_BMK_1241…	K13114+K14396+K06100+K13126+K13126+K14328+K04382+K11584+K11584+K14411+K14324+K12812+K12812+K12812+K14327+K14326+K14409+K14416+K14416+K12875+K06100+K03265+K14376+K13025+K11584+K12881+K12876+K14396+K12812+K06100+K03265+K03265+K03265+K14409+K00565+K12812+K06100+K08873+K14407+K03456+K04382+K14376+K03267+K14327+K08873+K14401+K14327+K14409+K06100+K14408+K14408+K06100+K14411+K14327+K14327+K14411+K11584+…
mTOR signaling pathway	51	Munro_Bamboo_unigene_BMK_10992;Munro_Bamboo_unigene_BMK_11358;Munro_Bamboo_unigene_BMK_12337;Munro_Bamboo_unigene_BMK_13872;Munro_Bamboo_unigene_BMK_15560;Munro_Bamboo_unigene_BMK_16468;Munro_Bamboo_unigene_BMK_16774;Munro_Bamboo_unigene_BMK_17186;Munro_Bamboo_unigene_BMK_19350;Munro_Bamboo_unigene_BMK_22440;Munro_Bamboo_unigene_BMK_24357;Munro_Bamboo_unigene_BMK_24620;Munro_Bamboo_unigene_BMK_25…	K04371+K08266+K02991+K07203+K07204+K07198+K03259+K04371+K07204+K07204+K03259+K04371+K04371+K06276+K04371+K04371+K07198+K04371+K06276+K02991+K07198+K03259+K03259+K03259+K03259+K03259+K07203+K08272+K07203+K07204+K07204+K07204+K04371+K04371+K02991+K04371+K07203+K07203+K07203+K02991+K07203+K07204+K04371+K02991+K03259+K07203+K07203+K07203+K08269+K06276+K04371
p53 signaling pathway	44	Munro_Bamboo_unigene_BMK_11166;Munro_Bamboo_unigene_BMK_11507;Munro_Bamboo_unigene_BMK_12895;Munro_Bamboo_unigene_BMK_13380;Munro_Bamboo_unigene_BMK_13950;Munro_Bamboo_unigene_BMK_16026;Munro_Bamboo_unigene_BMK_1995;Munro_Bamboo_unigene_BMK_20455;Munro_Bamboo_unigene_BMK_21163;Munro_Bamboo_unigene_BMK_21897;Munro_Bamboo_unigene_BMK_25004;Munro_Bamboo_unigene_BMK_25222;Munro_Bamboo_unigene_BMK_256…	K05868+K10144+K05868+K04506+K04728+K04506+K04728+K10144+K04506+K06640+K04506+K10134+K04728+K10144+K04506+K04506+K04728+K10144+K04728+K04728+K04506+K10134+K10808+K10143+K08738+K06640+K06640+K10144+K10143+K10140+K08738+K10140+K10144+K08738+K04728+K04506+K10134+K05868+K02087+K04728+K10140+K01110+K10808+K10808
