# Supplementary material for: Transcriptome Sequencing and De Novo Analysis for Ma Bamboo (Dendrocalamus latiflorus Munro) Using the Illumina Platform
Source: PLoS One. 2012 Oct 3;7(10):e46766. doi: 10.1371/journal.pone.0046766 (PMC3463524; doi:10.1371/journal.pone.0046766)
Supplement: Table S4 — Putative homologs of Ma bamboo identified in Moso bamboo cDNA dataset and the annotation by NCBI Nr, Nt, Swiss-Prot and GO seqdb databases. (XLS) [file pone.0046766.s004.xls]

#Gene	COG_annotation	COG_class_annotation	GO_annotation	interproscan	KEGG_annotation	KEGG_pathway	NR_annotation	NT_annotation	Swissprot	TrEMBL
Munro_Bamboo_unigene_BMK_10060; 1; bphyem114e13; 1	--	--	--	--	Os03g0744600	--	Os03g0744600 [Oryza sativa Japonica Group] dbj|BAC78581.1| hypothetical protein [Oryza sativa Japonica Group] gb|ABF98823.1| Stem-specific protein TSJT1, putative, expressed [Oryza sativa Japonica Group] dbj|BAG89647.1| unnamed protein product [Oryza sativa Japonica Group] dbj|BAF13152.2| Os03g0744600 [Oryza sativa Japonica Group]	Phyllostachys edulis cDNA clone: bphyem114e13, full insert sequence	Stem-specific protein TSJT1 OS=Nicotiana tabacum GN=TSJT1 PE=2 SV=1	Putative uncharacterized protein OSJNBb0036F07.11 OS=Oryza sativa subsp. japonica GN=OSJNBb0036F07.11 PE=4 SV=1
Munro_Bamboo_unigene_BMK_10105; 1; bphyem204a21; -1	--	--	--	--	--	--	--	Phyllostachys edulis cDNA clone: bphyem204a21, full insert sequence	--	--
Munro_Bamboo_unigene_BMK_10142; 1; bphyst006i11; 1	Vesicle coat complex COPI, zeta subunit	Posttranslational modification, protein turnover, chaperones		Biological Process: transport (GO:0006810);	IPR011012: Longin-like; IPR022775: AP complex, mu/sigma subunit	Os05g0461000	--	Os05g0461000 [Oryza sativa Japonica Group] sp|Q9MAX5.1|COPZ1_ORYSJ RecName: Full=Coatomer subunit zeta-1; AltName: Full=Zeta-1-coat protein; AltName: Full=Zeta-COP 1; AltName: Full=Zeta1-COP dbj|BAA95144.1| zeta1-COP [Oryza sativa Japonica Group] gb|AAT39171.1| coatomer zeta1 subunit [Oryza sativa Japonica Group] dbj|BAF17674.1| Os05g0461000 [Oryza sativa Japonica Group] dbj|BAG96470.1| unnamed protein product [Oryza sativa Japonica Group] dbj|BAG90106.1| unnamed protein product [Oryza sativa Japonica Group] dbj|BAG86912.1| unnamed protein product [Oryza sativa Japonica Group] gb|EEC79357.1| hypothetical protein OsI_20235 [Oryza sativa Indica Group] gb|EEE63990.1| hypothetical protein OsJ_18819 [Oryza sativa Japonica Group]	Phyllostachys edulis cDNA clone: bphyst006i11, full insert sequence	Coatomer subunit zeta-1 OS=Oryza sativa subsp. japonica GN=COPZ1 PE=2 SV=1	Putative uncharacterized protein OS=Oryza sativa subsp. indica GN=OsI_20235 PE=4 SV=1
Munro_Bamboo_unigene_BMK_10210; 1; bphylf036o16; -1	--	--	Molecular Function: electron carrier activity (GO:0009055);; Molecular Function: heme binding (GO:0020037);	Molecular Function: iron ion binding (GO:0005506);	IPR002326: Cytochrome c1; IPR009056: Cytochrome c domain	IPR021157: Cytochrome c1, transmembrane anchor, C-terminal	Os05g0301700; K00413 ubiquinol-cytochrome c reductase cytochrome c1 subunit [EC:1.10.2.2]	Metabolism; Energy Metabolism; Oxidative phosphorylation [PATH:ko00190] Organismal Systems; Circulatory System; Cardiac muscle contraction [PATH:ko04260] Human Diseases; Neurodegenerative Diseases; Alzheimer's disease [PATH:ko05010] Human Diseases; Neurodegenerative Diseases; Parkinson's disease [PATH:ko05012] Human Diseases; Neurodegenerative Diseases; Huntington's disease [PATH:ko05016]	hypothetical protein OsI_19367 [Oryza sativa Indica Group] gb|EEE63153.1| hypothetical protein OsJ_17962 [Oryza sativa Japonica Group]	Phyllostachys edulis cDNA clone: bphylf040g22, full insert sequence	Cytochrome c1-1, heme protein, mitochondrial OS=Solanum tuberosum GN=CYCL PE=2 SV=1	Os05g0301700 protein OS=Oryza sativa subsp. japonica GN=Os05g0301700 PE=2 SV=1
Munro_Bamboo_unigene_BMK_10229; 1; bphylf052d12; 1	--	--	Biological Process: clathrin coat assembly (GO:0048268);; Cellular Component: clathrin coat (GO:0030118);	Molecular Function: 1-phosphatidylinositol binding (GO:0005545);	Molecular Function: clathrin binding (GO:0030276);	Molecular Function: phospholipid binding (GO:0005543);	IPR008942: ENTH/VHS; IPR011417: ANTH	IPR013809: Epsin-like, N-terminal	IPR014712: Clathrin adaptor, phosphoinositide-binding, GAT-like	Os05g0549000	--	Os05g0549000 [Oryza sativa Japonica Group] dbj|BAF18146.1| Os05g0549000 [Oryza sativa Japonica Group] gb|EEE64590.1| hypothetical protein OsJ_19442 [Oryza sativa Japonica Group]	Phyllostachys edulis cDNA clone: bphylf052d12, full insert sequence	Putative clathrin assembly protein At2g01600 OS=Arabidopsis thaliana GN=At2g01600 PE=2 SV=2	Os05g0549000 protein OS=Oryza sativa subsp. japonica GN=Os05g0549000 PE=4 SV=1
Munro_Bamboo_unigene_BMK_10296; 1; bphylf028f13; -1	26S proteasome regulatory complex component	Posttranslational modification, protein turnover, chaperones		Molecular Function: binding (GO:0005488);; Molecular Function: protein binding (GO:0005515);	IPR000717: Proteasome component (PCI) domain; IPR011990: Tetratricopeptide-like helical	IPR011991: Winged helix-turn-helix transcription repressor DNA-binding	IPR013143: PCI/PINT associated module	Os01g0279200; K12176 COP9 signalosome complex subunit 2	Genetic Information Processing; Folding, Sorting and Degradation; Ubiquitin system [BR:ko04121]	Os01g0279200 [Oryza sativa Japonica Group] dbj|BAF04660.1| Os01g0279200 [Oryza sativa Japonica Group] gb|EEC70406.1| hypothetical protein OsI_01398 [Oryza sativa Indica Group] gb|EEE54333.1| hypothetical protein OsJ_01306 [Oryza sativa Japonica Group]	Phyllostachys edulis cDNA clone: bphylf028f13, full insert sequence	COP9 signalosome complex subunit 2 OS=Arabidopsis thaliana GN=CSN2 PE=1 SV=1	Os01g0279200 protein OS=Oryza sativa subsp. japonica GN=Os01g0279200 PE=4 SV=1
Munro_Bamboo_unigene_BMK_10317; 1; Munro_Bamboo_unigene_BMK_53481; 1; bphylf025j16; -1; bphylf333z39; -1	--	--	--	--	hypothetical protein	--	hypothetical protein SORBIDRAFT_09g029940 [Sorghum bicolor] gb|EES18770.1| hypothetical protein SORBIDRAFT_09g029940 [Sorghum bicolor]	Phyllostachys edulis cDNA clone: bphylf333z39, full insert sequence	Probable protein ABIL4 OS=Oryza sativa subsp. japonica GN=Os05g0585400 PE=2 SV=1	Putative uncharacterized protein Sb09g029940 OS=Sorghum bicolor GN=Sb09g029940 PE=4 SV=1
Munro_Bamboo_unigene_BMK_10464; 1; bphyem204a13; 1	Pirin-related protein	General function prediction only		--	--	Os08g0364900	--	hypothetical protein OsI_28981 [Oryza sativa Indica Group]	Phyllostachys edulis cDNA clone: bphyem204a13, full insert sequence	Pirin-like protein OS=Solanum lycopersicum PE=2 SV=1	Putative pirin OS=Oryza sativa subsp. japonica GN=OJ1484_G09.113 PE=4 SV=1
Munro_Bamboo_unigene_BMK_1064; 1; bphylf044c09; 1	--	--	Biological Process: chromatin assembly or disassembly (GO:0006333);; Cellular Component: nucleus (GO:0005634);	IPR006818: Histone chaperone, ASF1-like	Os05g0553800; K10753 histone chaperone ASF1	Genetic Information Processing; Replication and Repair; Chromosome [BR:ko03036]	hypothetical protein OsJ_19479 [Oryza sativa Japonica Group]	Phyllostachys edulis cDNA clone: bphylf044c09, full insert sequence	Histone chaperone ASF1B OS=Arabidopsis thaliana GN=ASF1B PE=1 SV=1	Os05g0553800 protein OS=Oryza sativa subsp. japonica GN=OJ1263_E10.5 PE=2 SV=1
Munro_Bamboo_unigene_BMK_10656; 1; Munro_Bamboo_unigene_BMK_14324; 1; bphyst007i18; -1	NTP pyrophosphohydrolases including oxidative damage repair enzymes	--		--	--	hypothetical protein LOC100191364	--	putative NUDIX hydrolase [Oryza sativa Japonica Group] gb|ABF99484.1| hydrolase, NUDIX family protein, expressed [Oryza sativa Japonica Group] gb|EEC76388.1| hypothetical protein OsI_14015 [Oryza sativa Indica Group]	Phyllostachys edulis cDNA clone: bphyst007i18, full insert sequence	Nudix hydrolase 16, mitochondrial OS=Arabidopsis thaliana GN=NUDT16 PE=2 SV=1	Hydrolase, NUDIX family protein, expressed OS=Oryza sativa subsp. japonica GN=OSJNBa0028F23.8 PE=3 SV=1
Munro_Bamboo_unigene_BMK_10670; -1; Munro_Bamboo_unigene_BMK_25567; -1; Munro_Bamboo_unigene_BMK_27831; 1; bphyem127m06; 1	--	--	--	--	Os05g0542200	--	hypothetical protein OsI_20833 [Oryza sativa Indica Group]	Phyllostachys edulis cDNA clone: bphyem127m06, full insert sequence	--	Os05g0542200 protein OS=Oryza sativa subsp. japonica GN=OJ1362_G11.17 PE=4 SV=1
Munro_Bamboo_unigene_BMK_10671; 1; bphyst027n24; 1	--	--	--	--	Os03g0851300; K03035 26S proteasome regulatory subunit N5	Genetic Information Processing; Folding, Sorting and Degradation; Proteasome [PATH:ko03050] Genetic Information Processing; Folding, Sorting and Degradation; Proteasome [BR:ko03051]	Os03g0851300 [Oryza sativa Japonica Group] gb|AAO20069.1| putative proteasome regulatory non-ATPase subunit [Oryza sativa Japonica Group] gb|ABF99929.1| PCI domain containing protein, expressed [Oryza sativa Japonica Group] dbj|BAF13828.1| Os03g0851300 [Oryza sativa Japonica Group] dbj|BAG92346.1| unnamed protein product [Oryza sativa Japonica Group] dbj|BAG93530.1| unnamed protein product [Oryza sativa Japonica Group]	Oryza sativa Japonica Group Os03g0851300 (Os03g0851300) mRNA, complete cds	26S proteasome non-ATPase regulatory subunit 12 OS=Dictyostelium discoideum GN=psmD12 PE=2 SV=1	Os03g0851300 protein OS=Oryza sativa subsp. japonica GN=OSJNBa0015N08.15 PE=2 SV=1
Munro_Bamboo_unigene_BMK_1070; 1; Munro_Bamboo_unigene_BMK_40388; 1; bphyem001g21; -1	--	--	--	--	transcriptional regulator ATRX (X-linked helicase II)	--	transcriptional regulator ATRX (X-linked helicase II) [Aedes aegypti] gb|EAT47778.1| transcriptional regulator ATRX (X-linked helicase II) [Aedes aegypti]	Phyllostachys edulis cDNA clone: bphyst029g20, full insert sequence	--	Transcriptional regulator ATRX (X-linked helicase II) OS=Aedes aegypti GN=AAEL001141 PE=4 SV=1
Munro_Bamboo_unigene_BMK_10853; 1; bphyem207d09; -1	Serine/threonine protein kinase	--		Molecular Function: transferase activity, transferring phosphorus-containing groups (GO:0016772);	IPR011009: Protein kinase-like domain	Os01g0231500	--	hypothetical protein OsI_01020 [Oryza sativa Indica Group]	Phyllostachys edulis cDNA clone: bphyem207d09, full insert sequence	Casein kinase I isoform delta-like OS=Arabidopsis thaliana GN=At4g26100 PE=2 SV=2	Putative uncharacterized protein OS=Oryza sativa subsp. indica GN=OsI_01020 PE=4 SV=1
Munro_Bamboo_unigene_BMK_10868; 1; Munro_Bamboo_unigene_BMK_21580; 1; bphyem119j15; 1; bphyem127d15; 1; bphylf029i17; 1	--	--	Biological Process: regulation of transcription, DNA-dependent (GO:0006355);; Molecular Function: DNA binding (GO:0003677);	Molecular Function: sequence-specific DNA binding transcription factor activity (GO:0003700);	IPR001471: Pathogenesis-related transcriptional factor/ERF, DNA-binding; IPR016177: DNA-binding, integrase-type	DNA binding protein	--	DNA binding protein [Zea mays] gb|ACN30755.1| unknown [Zea mays]	Phyllostachys edulis cDNA clone: bphylf029i17, full insert sequence	Ethylene-responsive transcription factor-like protein At4g13040 OS=Arabidopsis thaliana GN=At4g13040 PE=2 SV=2	Putative uncharacterized protein OS=Zea mays PE=2 SV=1
Munro_Bamboo_unigene_BMK_10869; 1; bphyst013m05; -1	Archaeal/vacuolar-type H+-ATPase subunit E	Energy production and conversion		--	--	hypothetical protein; K02150 V-type H+-transporting ATPase subunit E [EC:3.6.3.14]	Metabolism; Energy Metabolism; Oxidative phosphorylation [PATH:ko00190] Cellular Processes; Transport and Catabolism; Phagosome [PATH:ko04145] Organismal Systems; Excretory System; Collecting duct acid secretion [PATH:ko04966] Human Diseases; Immune System Diseases; Rheumatoid arthritis [PATH:ko05323] Human Diseases; Infectious Diseases; Vibrio cholerae infection [PATH:ko05110] Human Diseases; Infectious Diseases; Epithelial cell signaling in Helicobacter pylori infection [PATH:ko05120]	hypothetical protein SORBIDRAFT_03g001360 [Sorghum bicolor] gb|EES00037.1| hypothetical protein SORBIDRAFT_03g001360 [Sorghum bicolor]	Phyllostachys edulis cDNA clone: bphyst013m05, full insert sequence	V-type proton ATPase subunit E OS=Citrus limon GN=VATE PE=2 SV=1	Putative uncharacterized protein Sb03g001360 OS=Sorghum bicolor GN=Sb03g001360 PE=4 SV=1
Munro_Bamboo_unigene_BMK_11103; 1; bphyst006p23; -1	--	--	Biological Process: actin filament polymerization (GO:0030041);; Cellular Component: cytoskeleton (GO:0005856);	IPR008384: ARP23 complex 20kDa subunit	Os03g0848300; K05755 actin related protein 2/3 complex, subunit 4	Cellular Processes; Cell Motility; Regulation of actin cytoskeleton [PATH:ko04810] Cellular Processes; Cell Motility; Cytoskeleton proteins [BR:ko04812] Organismal Systems; Immune System; Fc gamma R-mediated phagocytosis [PATH:ko04666] Human Diseases; Infectious Diseases; Pathogenic Escherichia coli infection [PATH:ko05130] Human Diseases; Infectious Diseases; Shigellosis [PATH:ko05131] Human Diseases; Infectious Diseases; Bacterial invasion of epithelial cells [PATH:ko05100]	Os03g0848300 [Oryza sativa Japonica Group] gb|AAO37935.1| putative actin-related complex protein [Oryza sativa Japonica Group] gb|ABF99893.1| Actin-related protein 2/3 complex subunit 4, putative, expressed [Oryza sativa Japonica Group] dbj|BAF13806.1| Os03g0848300 [Oryza sativa Japonica Group] gb|EAY92581.1| hypothetical protein OsI_14322 [Oryza sativa Indica Group] gb|EAZ29302.1| hypothetical protein OsJ_13363 [Oryza sativa Japonica Group] gb|ABR25446.1| actin-related protein 2/3 complex subunit 4 [Oryza sativa Indica Group]	Phyllostachys edulis cDNA clone: bphyst006p23, full insert sequence	Actin-related protein 2/3 complex subunit 4 OS=Dictyostelium discoideum GN=arcD PE=1 SV=1	Actin-related protein 2/3 complex subunit 4, putative, expressed OS=Oryza sativa subsp. japonica GN=OSJNBb0096M04.125 PE=4 SV=1
Munro_Bamboo_unigene_BMK_11139; 1; Munro_Bamboo_unigene_BMK_25405; 1; bphylf046e18; 1	--	--	Biological Process: fatty acid biosynthetic process (GO:0006633);; Biological Process: metabolic process (GO:0008152);	Cellular Component: membrane (GO:0016020);	Molecular Function: catalytic activity (GO:0003824);	Molecular Function: transferase activity, transferring acyl groups other than amino-acyl groups (GO:0016747);	IPR013601: FAE1/Type III polyketide synthase-like protein; IPR016038: Thiolase-like, subgroup	IPR016039: Thiolase-like	Os03g0181500	--	hypothetical protein OsJ_09660 [Oryza sativa Japonica Group]	Phyllostachys edulis cDNA clone: bphylf046e18, full insert sequence	3-ketoacyl-CoA synthase 10 OS=Arabidopsis thaliana GN=FDH PE=1 SV=2	3-ketoacyl-CoA synthase OS=Oryza sativa subsp. japonica GN=OSJNBb0076N15.12 PE=3 SV=1
Munro_Bamboo_unigene_BMK_112; 1; bphylf025k07; -1; bphylf030l17; -1; bphyst004h08; -1	Malate/lactate dehydrogenases	Energy production and conversion		Biological Process: carbohydrate metabolic process (GO:0005975);; Biological Process: cellular carbohydrate metabolic process (GO:0044262);	Biological Process: malate metabolic process (GO:0006108);	Biological Process: oxidation-reduction process (GO:0055114);	Molecular Function: L-malate dehydrogenase activity (GO:0030060);	Molecular Function: catalytic activity (GO:0003824);	Molecular Function: malate dehydrogenase activity (GO:0016615);	Molecular Function: nucleotide binding (GO:0000166);	Molecular Function: oxidoreductase activity (GO:0016491);	Molecular Function: oxidoreductase activity, acting on the CH-OH group of donors, NAD or NADP as acceptor (GO:0016616);	IPR001236: Lactate/malate dehydrogenase, N-terminal; IPR001252: Malate dehydrogenase, active site	IPR001557: L-lactate/malate dehydrogenase	IPR010945: Malate dehydrogenase, type 2	IPR011274: Malate dehydrogenase, NAD-dependent, cytosolic	IPR015955: Lactate dehydrogenase/glycoside hydrolase, family 4, C-terminal	IPR016040: NAD(P)-binding domain	IPR022383: Lactate/malate dehydrogenase, C-terminal	mdh5; malate dehydrogenase5 (EC:1.1.1.37); K00025 malate dehydrogenase [EC:1.1.1.37]	Metabolism; Carbohydrate Metabolism; Citrate cycle (TCA cycle) [PATH:ko00020] Metabolism; Carbohydrate Metabolism; Pyruvate metabolism [PATH:ko00620] Metabolism; Carbohydrate Metabolism; Glyoxylate and dicarboxylate metabolism [PATH:ko00630] Metabolism; Energy Metabolism; Carbon fixation in photosynthetic organisms [PATH:ko00710] Organismal Systems; Excretory System; Proximal tubule bicarbonate reclamation [PATH:ko04964]	malate dehydrogenase, cytoplasmic [Zea mays] sp|Q08062.2|MDHC_MAIZE RecName: Full=Malate dehydrogenase, cytoplasmic gb|AAB64290.1| cytoplasmic malate dehydrogenase [Zea mays] gb|ACR34469.1| unknown [Zea mays]	Phyllostachys edulis cDNA clone: bphylf025k07, full insert sequence	Malate dehydrogenase, cytoplasmic OS=Zea mays PE=2 SV=2	Malate dehydrogenase OS=Zea mays PE=2 SV=1
Munro_Bamboo_unigene_BMK_11266; 1; bphyem115a03; 1	Uncharacterized proteins of PilT N-term./Vapc superfamily	General function prediction only		--	--	Os02g0468200	--	Os02g0468200 [Oryza sativa Japonica Group] dbj|BAD19361.1| unknown protein [Oryza sativa Japonica Group] dbj|BAD19576.1| unknown protein [Oryza sativa Japonica Group] dbj|BAF08735.1| Os02g0468200 [Oryza sativa Japonica Group] dbj|BAG96251.1| unnamed protein product [Oryza sativa Japonica Group] gb|EEE56963.1| hypothetical protein OsJ_06675 [Oryza sativa Japonica Group]	Phyllostachys edulis cDNA clone: bphyem115a03, full insert sequence	rRNA-processing protein UTP23 homolog OS=Mus musculus GN=Utp23 PE=2 SV=1	Os02g0468200 protein OS=Oryza sativa subsp. japonica GN=OJ1342_D02.35 PE=2 SV=1
Munro_Bamboo_unigene_BMK_11267; 1; bphylf039h11; 1	Type II secretory pathway, component HofQ	Intracellular trafficking, secretion, and vesicular transport		--	--	hypothetical protein	--	unknown [Zea mays]	Phyllostachys edulis cDNA clone: bphyem112n17, full insert sequence	Xylogen-like protein 11 OS=Arabidopsis thaliana GN=XYP11 PE=1 SV=2	Putative uncharacterized protein OS=Zea mays PE=2 SV=1
Munro_Bamboo_unigene_BMK_1138; 1; bphyem111l07; 1	--	--	--	--	--	--	--	Phyllostachys edulis cDNA clone: bphyem111l07, full insert sequence	--	--
Munro_Bamboo_unigene_BMK_11395; 1; bphylf036j07; -1	--	--	--	--	Os01g0751300	--	Os01g0751300 [Oryza sativa Japonica Group] dbj|BAD87102.1| unknown protein [Oryza sativa Japonica Group] dbj|BAD87177.1| unknown protein [Oryza sativa Japonica Group] dbj|BAF06172.1| Os01g0751300 [Oryza sativa Japonica Group]	Phyllostachys edulis cDNA clone: bphylf036j07, full insert sequence	--	Os01g0751300 protein OS=Oryza sativa subsp. japonica GN=P0435B05.8 PE=4 SV=1
Munro_Bamboo_unigene_BMK_11492; 1; bphyem127l12; -1	Uncharacterized protein contain chitin-binding domain type 3	General function prediction only		--	--	Os10g0542900	--	hypothetical protein OsI_34517 [Oryza sativa Indica Group]	Phyllostachys edulis cDNA clone: bphyem127l12, full insert sequence	Chitinase 8 OS=Oryza sativa subsp. japonica GN=Cht8 PE=2 SV=1	Putative uncharacterized protein OS=Oryza sativa subsp. indica GN=OsI_34517 PE=4 SV=1
Munro_Bamboo_unigene_BMK_11497; 1; bphyem108l20; -1	Acetyltransferases	General function prediction only		--	--	sgb101; silencing gene B101; K00670 peptide alpha-N-acetyltransferase [EC:2.3.1.88]	Unclassified; Metabolism; Others	hypothetical protein SORBIDRAFT_06g029930 [Sorghum bicolor] gb|EES12930.1| hypothetical protein SORBIDRAFT_06g029930 [Sorghum bicolor]	Phyllostachys edulis cDNA clone: bphyem108l20, full insert sequence	N-alpha-acetyltransferase 11, NatA catalytic subunit OS=Mus musculus GN=Naa11 PE=2 SV=1	Silencing group B protein OS=Zea mays GN=sgb101 PE=2 SV=1
Munro_Bamboo_unigene_BMK_11550; 1; bphyem202e14; 1	4-aminobutyrate aminotransferase and related aminotransferases	Amino acid transport and metabolism		Molecular Function: catalytic activity (GO:0003824);; Molecular Function: pyridoxal phosphate binding (GO:0030170);	Molecular Function: transaminase activity (GO:0008483);	IPR005814: Aminotransferase class-III; IPR015421: Pyridoxal phosphate-dependent transferase, major region, subdomain 1	IPR015422: Pyridoxal phosphate-dependent transferase, major region, subdomain 2	IPR015424: Pyridoxal phosphate-dependent transferase, major domain	Os03g0171900; K00827 alanine-glyoxylate transaminase / (R)-3-amino-2-methylpropionate-pyruvate transaminase [EC:2.6.1.44 2.6.1.40]	Metabolism; Amino Acid Metabolism; Alanine, aspartate and glutamate metabolism [PATH:ko00250] Metabolism; Amino Acid Metabolism; Glycine, serine and threonine metabolism [PATH:ko00260] Metabolism; Amino Acid Metabolism; Amino acid related enzymes [BR:ko01007]	alanine-glyoxylate aminotransferase [Triticum aestivum]	Phyllostachys edulis cDNA clone: bphyem202e14, full insert sequence	Alanine--glyoxylate aminotransferase 2 homolog 1, mitochondrial OS=Arabidopsis thaliana GN=AGT2 PE=1 SV=1	Alanine-glyoxylate aminotransferase OS=Triticum aestivum GN=TaSAG4 PE=2 SV=1
Munro_Bamboo_unigene_BMK_11553; 1; bphyem213b17; 1	Pyridoxal/pyridoxine/pyridoxamine kinase	Coenzyme transport and metabolism		Biological Process: pyridoxal 5'-phosphate salvage (GO:0009443);; Molecular Function: pyridoxal kinase activity (GO:0008478);	IPR004625: Pyridoxal phosphate (active vitamin B6) biosynthesis, pyridoxal kinase; IPR013749: Phosphomethylpyrimidine kinase type-1	Os12g0600400; K00868 pyridoxine kinase [EC:2.7.1.35]	Metabolism; Metabolism of Cofactors and Vitamins; Vitamin B6 metabolism [PATH:ko00750]	pyridoxal kinase [Triticum aestivum] gb|ADM43601.1| pyridoxal kinase [Triticum aestivum]	Phyllostachys edulis cDNA clone: bphyem213b17, full insert sequence	Pyridoxal kinase OS=Arabidopsis thaliana GN=PK PE=1 SV=2	Pyridoxal kinase OS=Triticum aestivum GN=SOS4 PE=2 SV=1
Munro_Bamboo_unigene_BMK_11588; 1; bphylf061p15; 1	TATA-box binding protein (TBP), component of TFIID and TFIIIB	Transcription		Biological Process: regulation of transcription, DNA-dependent (GO:0006355);; Biological Process: transcription initiation from RNA polymerase II promoter (GO:0006367);	Molecular Function: DNA binding (GO:0003677);	Molecular Function: binding (GO:0005488);	IPR000814: TATA-box binding protein; IPR012294: Transcription factor TFIID, C-terminal/DNA glycosylase, N-terminal	IPR012295: Beta2-adaptin/TATA-box binding, C-terminal	Os03g0657000; K03120 transcription initiation factor TFIID TATA-box-binding protein	Genetic Information Processing; Transcription; Basal transcription factors [PATH:ko03022] Genetic Information Processing; Transcription; Transcription factors [BR:ko03000] Human Diseases; Neurodegenerative Diseases; Huntington's disease [PATH:ko05016]	hypothetical protein OsJ_11965 [Oryza sativa Japonica Group]	Phyllostachys edulis cDNA clone: bphylf061p15, full insert sequence	TATA-binding protein 2 OS=Oryza sativa subsp. japonica GN=TBP2 PE=1 SV=2	Os03g0657000 protein OS=Oryza sativa subsp. japonica GN=Os03g0657000 PE=2 SV=1
Munro_Bamboo_unigene_BMK_1161; 1; bphyem115d13; -1	--	--	--	--	hypothetical protein	--	hypothetical protein OsI_20880 [Oryza sativa Indica Group] gb|EEE64601.1| hypothetical protein OsJ_19453 [Oryza sativa Japonica Group]	Phyllostachys edulis cDNA clone: bphyem115d13, full insert sequence	Reticulon-like protein B9 OS=Arabidopsis thaliana GN=RTNLB9 PE=2 SV=1	Putative uncharacterized protein OS=Oryza sativa subsp. japonica GN=OsJ_19453 PE=4 SV=1
Munro_Bamboo_unigene_BMK_11648; 1; bphyem103j20; -1; bphyem120p09; -1	Translation initiation factor 2 (IF-2; GTPase)	Translation, ribosomal structure and biogenesis		Cellular Component: intracellular (GO:0005622);; Molecular Function: zinc ion binding (GO:0008270);	IPR001876: Zinc finger, RanBP2-type	Zn-finger, RanBP-type, containing protein	--	Zn-finger, RanBP-type, containing protein [Zea mays] gb|ACG31178.1| Zn-finger, RanBP-type, containing protein [Zea mays]	Phyllostachys edulis cDNA clone: bphyem120p09, full insert sequence	RanBP2-type zinc finger protein At1g67325 OS=Arabidopsis thaliana GN=At1g67325 PE=1 SV=1	Zn-finger, RanBP-type, containing protein OS=Zea mays PE=2 SV=1
Munro_Bamboo_unigene_BMK_11708; 1; bphyem204d01; 1	--	--	--	--	hypothetical protein	--	hypothetical protein OsJ_29902 [Oryza sativa Japonica Group]	Phyllostachys edulis cDNA clone: bphyem204d01, full insert sequence	Auxin-induced in root cultures protein 12 OS=Arabidopsis thaliana GN=AIR12 PE=1 SV=3	Putative uncharacterized protein OS=Oryza sativa subsp. japonica GN=OsJ_29902 PE=4 SV=1
Munro_Bamboo_unigene_BMK_11879; 1; Munro_Bamboo_unigene_BMK_11880; 1; bphyem112i18; -1; bphyem201c16; -1; bphyem208f01; -1; bpst40201m21; -1	RNA-binding proteins (RRM domain)	General function prediction only		Molecular Function: nucleic acid binding (GO:0003676);; Molecular Function: nucleotide binding (GO:0000166);	IPR000504: RNA recognition motif domain; IPR012677: Nucleotide-binding, alpha-beta plait	hypothetical protein LOC100501457; K12831 splicing factor 3B subunit 4	Genetic Information Processing; Transcription; Spliceosome [PATH:ko03040] Genetic Information Processing; Transcription; Spliceosome [BR:ko03041]	hypothetical protein SORBIDRAFT_01g020190 [Sorghum bicolor] gb|EER94133.1| hypothetical protein SORBIDRAFT_01g020190 [Sorghum bicolor]	Phyllostachys edulis cDNA clone: bphyem112i18, full insert sequence	Splicing factor 3B subunit 4 OS=Rattus norvegicus GN=Sf3b4 PE=2 SV=1	Os10g0457000 protein OS=Oryza sativa subsp. japonica GN=Os10g0457000 PE=2 SV=1
Munro_Bamboo_unigene_BMK_12100; 1; Munro_Bamboo_unigene_BMK_19355; 1; bphylf041c24; -1	Tfp pilus assembly protein FimV	--		--	--	obf1; octopine synthase binding factor1	--	basic region/leucine zipper protein [Triticum aestivum]	Phyllostachys edulis cDNA clone: bphylf041c24, full insert sequence	Ocs element-binding factor 1 OS=Zea mays GN=OBF1 PE=2 SV=2	Basic region/leucine zipper protein OS=Triticum aestivum GN=TaOBF1d PE=2 SV=1
Munro_Bamboo_unigene_BMK_12225; 1; bphyem125l05; -1	--	--	--	IPR011598: Helix-loop-helix DNA-binding	Os08g0138500	--	helix-loop-helix-like protein [Triticum aestivum]	Phyllostachys edulis cDNA clone: bphyem125l05, full insert sequence	Transcription factor ILR3 OS=Arabidopsis thaliana GN=ILR3 PE=1 SV=1	Helix-loop-helix-like protein OS=Triticum aestivum PE=2 SV=1
Munro_Bamboo_unigene_BMK_12234; 1; bphyem204h16; -1	DnaJ-class molecular chaperone	Posttranslational modification, protein turnover, chaperones		--	--	dnaJ subfamily B member 5; K09510 DnaJ homolog subfamily B member 4	Genetic Information Processing; Folding, Sorting and Degradation; Chaperones and folding catalysts [BR:ko03110]	dnaJ subfamily B member 5 [Zea mays] gb|ACG33834.1| dnaJ subfamily B member 5 [Zea mays]	Phyllostachys edulis cDNA clone: bphyem204h16, full insert sequence	DnaJ homolog subfamily B member 6 OS=Bos taurus GN=DNAJB6 PE=2 SV=1	DnaJ subfamily B member 5 OS=Zea mays PE=2 SV=1
Munro_Bamboo_unigene_BMK_12259; 1; bphyem113m19; 1	--	--	Molecular Function: binding (GO:0005488);; Molecular Function: protein binding (GO:0005515);	IPR011990: Tetratricopeptide-like helical; IPR013026: Tetratricopeptide repeat-containing	IPR019734: Tetratricopeptide repeat	Os01g0510600	--	Os01g0510600 [Oryza sativa Japonica Group] dbj|BAB92188.1| tetratricopeptide repeat(TPR)-containing protein-like [Oryza sativa Japonica Group] dbj|BAF05081.1| Os01g0510600 [Oryza sativa Japonica Group] dbj|BAG96957.1| unnamed protein product [Oryza sativa Japonica Group] gb|EEE54670.1| hypothetical protein OsJ_01968 [Oryza sativa Japonica Group]	Phyllostachys edulis cDNA clone: bphyem113m19, full insert sequence	Tetratricopeptide repeat protein 28 OS=Homo sapiens GN=TTC28 PE=1 SV=4	Os01g0510600 protein OS=Oryza sativa subsp. japonica GN=P0520B06.17 PE=2 SV=1
Munro_Bamboo_unigene_BMK_12266; 1; bphyst014a15; -1	--	--	--	--	hypothetical protein	--	hypothetical protein SORBIDRAFT_06g028620 [Sorghum bicolor] gb|EES12861.1| hypothetical protein SORBIDRAFT_06g028620 [Sorghum bicolor]	Phyllostachys edulis cDNA clone: bphyst014a15, full insert sequence	Uncharacterized protein At3g15000, mitochondrial OS=Arabidopsis thaliana GN=At3g15000 PE=1 SV=1	Putative uncharacterized protein Sb06g028620 OS=Sorghum bicolor GN=Sb06g028620 PE=4 SV=1
Munro_Bamboo_unigene_BMK_12272; 1; bphylf003n15; 1; bphyst003g10; 1	--	--	--	--	Os05g0562200	--	hypothetical protein OsI_20976 [Oryza sativa Indica Group]	Phyllostachys edulis cDNA clone: bphyst003g10, full insert sequence	Protein DEHYDRATION-INDUCED 19 OS=Oryza sativa subsp. japonica GN=DI19-1 PE=2 SV=1	Putative uncharacterized protein OS=Oryza sativa subsp. indica GN=OsI_20976 PE=4 SV=1
Munro_Bamboo_unigene_BMK_1228; 1; bphylf055m15; 1	--	--	--	--	Os04g0501800	--	H0311C03.8 [Oryza sativa Indica Group] gb|EAY94748.1| hypothetical protein OsI_16526 [Oryza sativa Indica Group]	Phyllostachys edulis cDNA clone: bphylf055m15, full insert sequence	--	OSJNBa0029H02.27 protein OS=Oryza sativa GN=OSJNBa0029H02.27 PE=4 SV=1
Munro_Bamboo_unigene_BMK_12288; 1; bphylf040b20; 1; bphyst006b16; 1; bphyst009a09; 1	--	--	Molecular Function: acid-amino acid ligase activity (GO:0016881);	IPR000608: Ubiquitin-conjugating enzyme, E2; IPR016135: Ubiquitin-conjugating enzyme/RWD-like	IPR023313: Ubiquitin-conjugating enzyme, active site	Os01g0673600; K10580 ubiquitin-conjugating enzyme E2 N [EC:6.3.2.19]	Genetic Information Processing; Folding, Sorting and Degradation; Ubiquitin mediated proteolysis  Genetic Information Processing; Folding, Sorting and Degradation; Ubiquitin system [BR:ko04121] Genetic Information Processing; Replication and Repair; DNA repair and recombination proteins [BR:ko03400]	Os01g0673600 [Oryza sativa Japonica Group] dbj|BAB84382.1| putative ubiquitin-conjugating enzyme E2 [Oryza sativa Japonica Group] dbj|BAC01179.1| putative ubiquitin-conjugating enzyme E2 [Oryza sativa Japonica Group] dbj|BAF05748.1| Os01g0673600 [Oryza sativa Japonica Group] dbj|BAH00779.1| unnamed protein product [Oryza sativa Japonica Group] gb|EEE55162.1| hypothetical protein OsJ_02975 [Oryza sativa Japonica Group]	Phyllostachys edulis cDNA clone: bphyst009a09, full insert sequence	Ubiquitin-conjugating enzyme E2 36 OS=Arabidopsis thaliana GN=UBC36 PE=1 SV=1	Ubiquitin carrier protein OS=Oryza sativa subsp. japonica GN=P0007F06.32 PE=2 SV=1
Munro_Bamboo_unigene_BMK_12321; 1; bphylf026a11; 1	--	--	--	IPR005516: Remorin, C-terminal; IPR005518: Remorin, N-terminal	Os04g0533300	--	Os04g0533300 [Oryza sativa Japonica Group] emb|CAE04574.1| OSJNBb0039L24.13 [Oryza sativa Japonica Group] dbj|BAF15323.1| Os04g0533300 [Oryza sativa Japonica Group] gb|EAY94960.1| hypothetical protein OsI_16768 [Oryza sativa Indica Group] gb|EAZ31446.1| hypothetical protein OsJ_15583 [Oryza sativa Japonica Group] dbj|BAG96338.1| unnamed protein product [Oryza sativa Japonica Group] dbj|BAG89383.1| unnamed protein product [Oryza sativa Japonica Group] dbj|BAG97622.1| unnamed protein product [Oryza sativa Japonica Group]	Phyllostachys edulis cDNA clone: bphylf026a11, full insert sequence	Remorin OS=Solanum tuberosum PE=1 SV=1	OSJNBb0039L24.13 protein OS=Oryza sativa subsp. japonica GN=OSJNBb0039L24.13 PE=2 SV=1
Munro_Bamboo_unigene_BMK_12332; 1; bphyst011l20; -1	Ribosomal protein S3	Translation, ribosomal structure and biogenesis		Biological Process: translation (GO:0006412);; Cellular Component: intracellular (GO:0005622);	Cellular Component: ribosome (GO:0005840);	Cellular Component: small ribosomal subunit (GO:0015935);	Molecular Function: RNA binding (GO:0003723);	Molecular Function: structural constituent of ribosome (GO:0003735);	IPR001351: Ribosomal protein S3, C-terminal; IPR004044: K Homology, type 2	IPR005703: Ribosomal protein S3, eukaryotic/archaeal	IPR009019: K Homology, prokaryotic type	IPR015946: K homology domain-like, alpha/beta	IPR018280: Ribosomal protein S3, conserved site	Os03g0577000; K02985 small subunit ribosomal protein S3e	Genetic Information Processing; Translation; Ribosome [PATH:ko03010] Genetic Information Processing; Translation; Ribosome [BR:ko03011]	Os03g0577000 [Oryza sativa Japonica Group] gb|AAR10854.1| putative ribosomal protein [Oryza sativa Japonica Group] gb|ABF97260.1| 40S ribosomal protein S3, putative, expressed [Oryza sativa Japonica Group] dbj|BAF12453.1| Os03g0577000 [Oryza sativa Japonica Group] gb|EAY90747.1| hypothetical protein OsI_12347 [Oryza sativa Indica Group] gb|EAZ27575.1| hypothetical protein OsJ_11524 [Oryza sativa Japonica Group] dbj|BAG87698.1| unnamed protein product [Oryza sativa Japonica Group] dbj|BAG93951.1| unnamed protein product [Oryza sativa Japonica Group]	Phyllostachys edulis cDNA clone: bphylf029p02, full insert sequence	40S ribosomal protein S3-3 OS=Arabidopsis thaliana GN=RPS3C PE=1 SV=1	40S ribosomal protein S3, putative, expressed OS=Oryza sativa subsp. japonica GN=Os03g0577000 PE=2 SV=1
Munro_Bamboo_unigene_BMK_12341; 1; bphylf044h12; -1	Malate/lactate dehydrogenases	Energy production and conversion		Biological Process: carbohydrate metabolic process (GO:0005975);; Biological Process: cellular carbohydrate metabolic process (GO:0044262);	Biological Process: malate metabolic process (GO:0006108);	Biological Process: oxidation-reduction process (GO:0055114);	Molecular Function: L-malate dehydrogenase activity (GO:0030060);	Molecular Function: catalytic activity (GO:0003824);	Molecular Function: malate dehydrogenase activity (GO:0016615);	Molecular Function: nucleotide binding (GO:0000166);	Molecular Function: oxidoreductase activity (GO:0016491);	Molecular Function: oxidoreductase activity, acting on the CH-OH group of donors, NAD or NADP as acceptor (GO:0016616);	IPR001236: Lactate/malate dehydrogenase, N-terminal; IPR001252: Malate dehydrogenase, active site	IPR001557: L-lactate/malate dehydrogenase	IPR010097: Malate dehydrogenase, type 1	IPR015955: Lactate dehydrogenase/glycoside hydrolase, family 4, C-terminal	IPR016040: NAD(P)-binding domain	IPR022383: Lactate/malate dehydrogenase, C-terminal	hypothetical protein LOC100272900; K00026 malate dehydrogenase [EC:1.1.1.37]	Metabolism; Carbohydrate Metabolism; Citrate cycle (TCA cycle) [PATH:ko00020] Metabolism; Carbohydrate Metabolism; Pyruvate metabolism [PATH:ko00620] Metabolism; Carbohydrate Metabolism; Glyoxylate and dicarboxylate metabolism [PATH:ko00630] Metabolism; Energy Metabolism; Carbon fixation in photosynthetic organisms [PATH:ko00710]	hypothetical protein LOC100272900 [Zea mays] gb|ACF84734.1| unknown [Zea mays]	Phyllostachys edulis cDNA clone: bphylf044h12, full insert sequence	Malate dehydrogenase 1, mitochondrial OS=Arabidopsis thaliana GN=At1g53240 PE=1 SV=1	Malate dehydrogenase OS=Oryza sativa subsp. japonica GN=P0047B08.9 PE=1 SV=1
Munro_Bamboo_unigene_BMK_12356; 1; bphyem203g03; 1	Beta-glucosidase-related glycosidases	Carbohydrate transport and metabolism		--	--	Os03g0749300	--	Os03g0749300 [Oryza sativa Japonica Group] gb|AAL58966.1|AC091811_15 putative exoglucanase precursor [Oryza sativa Japonica Group] gb|ABF98882.1| Glycosyl hydrolase family 3 N terminal domain containing protein, expressed [Oryza sativa Japonica Group] gb|ABF98883.1| Glycosyl hydrolase family 3 N terminal domain containing protein, expressed [Oryza sativa Japonica Group] gb|ABF98884.1| Glycosyl hydrolase family 3 N terminal domain containing protein, expressed [Oryza sativa Japonica Group] dbj|BAF13189.1| Os03g0749300 [Oryza sativa Japonica Group] gb|EAY91868.1| hypothetical protein OsI_13515 [Oryza sativa Indica Group] gb|EAZ28591.1| hypothetical protein OsJ_12577 [Oryza sativa Japonica Group] dbj|BAG89337.1| unnamed protein product [Oryza sativa Japonica Group]	Phyllostachys edulis cDNA clone: bphyem203g03, full insert sequence	Lysosomal beta glucosidase OS=Dictyostelium discoideum GN=gluA PE=1 SV=2	Putative exoglucanase OS=Oryza sativa GN=OSJNBa0069E14.7 PE=4 SV=1
Munro_Bamboo_unigene_BMK_12387; 1; bphyem211c19; 1; bphylf039e20; 1	FOG: Ankyrin repeat	General function prediction only		Molecular Function: protein binding (GO:0005515);	IPR002110: Ankyrin repeat; IPR020683: Ankyrin repeat-containing domain	Os03g0851700	--	Os03g0851700 [Oryza sativa Japonica Group] gb|AAO20057.1| unknown protein [Oryza sativa Japonica Group] gb|ABF99933.1| Ankyrin repeat domain protein 2, putative, expressed [Oryza sativa Japonica Group] dbj|BAF13831.1| Os03g0851700 [Oryza sativa Japonica Group] gb|EAY92612.1| hypothetical protein OsI_14356 [Oryza sativa Indica Group] dbj|BAG90747.1| unnamed protein product [Oryza sativa Japonica Group]	Phyllostachys edulis cDNA clone: bphyem211c19, full insert sequence	Ankyrin repeat domain-containing protein 2 OS=Arabidopsis thaliana GN=AKR2 PE=1 SV=2	Ankyrin repeat domain protein 2, putative, expressed OS=Oryza sativa subsp. japonica GN=OSJNBa0015N08.20 PE=2 SV=1
Munro_Bamboo_unigene_BMK_12388; 1; bphylf031n16; 1	--	--	Molecular Function: calcium ion binding (GO:0005509);	IPR001125: Recoverin; IPR002048: Calcium-binding EF-hand	IPR011992: EF-hand-like domain	IPR018249: EF-HAND 2	Os12g0597000; K06268 protein phosphatase 3, regulatory subunit	Environmental Information Processing; Signal Transduction; MAPK signaling pathway [PATH:ko04010] Environmental Information Processing; Signal Transduction; Wnt signaling pathway [PATH:ko04310] Environmental Information Processing; Signal Transduction; VEGF signaling pathway [PATH:ko04370] Environmental Information Processing; Signal Transduction; Calcium signaling pathway [PATH:ko04020] Cellular Processes; Cell Growth and Death; Oocyte meiosis [PATH:ko04114] Cellular Processes; Cell Growth and Death; Apoptosis [PATH:ko04210] Organismal Systems; Immune System; Natural killer cell mediated cytotoxicity [PATH:ko04650] Organismal Systems; Immune System; T cell receptor signaling pathway [PATH:ko04660] Organismal Systems; Immune System; B cell receptor signaling pathway [PATH:ko04662] Organismal Systems; Nervous System; Long-term potentiation [PATH:ko04720] Organismal Systems; Development; Axon guidance [PATH:ko04360] Human Diseases; Neurodegenerative Diseases; Alzheimer's disease [PATH:ko05010] Human Diseases; Neurodegenerative Diseases; Amyotrophic lateral sclerosis (ALS) [PATH:ko05014]	Os12g0597000 [Oryza sativa Japonica Group] sp|Q3HRP5.1|CNBL2_ORYSJ RecName: Full=Calcineurin B-like protein 2 gb|ABA54177.1| calcineurin B-like protein 2 [Oryza sativa Japonica Group] gb|ABA99199.2| Calcineurin B-like protein 3, putative, expressed [Oryza sativa Japonica Group] gb|ABG22071.1| Calcineurin B-like protein 3, putative, expressed [Oryza sativa Japonica Group] dbj|BAF30209.1| Os12g0597000 [Oryza sativa Japonica Group] gb|EEE53537.1| hypothetical protein OsJ_36745 [Oryza sativa Japonica Group]	Phyllostachys edulis cDNA clone: bphylf031n16, full insert sequence	Calcineurin B-like protein 2 OS=Oryza sativa subsp. japonica GN=CBL2 PE=2 SV=1	Putative uncharacterized protein OS=Oryza sativa subsp. japonica GN=OsJ_36745 PE=4 SV=1
Munro_Bamboo_unigene_BMK_12408; 1; bphylf049o03; -1	NTP pyrophosphohydrolases including oxidative damage repair enzymes	--		--	--	hypothetical protein	--	hypothetical protein SORBIDRAFT_04g028750 [Sorghum bicolor] gb|EES07305.1| hypothetical protein SORBIDRAFT_04g028750 [Sorghum bicolor]	Phyllostachys edulis cDNA clone: bphylf049o03, full insert sequence	Nudix hydrolase 18, mitochondrial OS=Arabidopsis thaliana GN=NUDT18 PE=2 SV=1	Putative uncharacterized protein Sb04g028750 OS=Sorghum bicolor GN=Sb04g028750 PE=3 SV=1
Munro_Bamboo_unigene_BMK_12422; 1; bphyst011l10; 1	Ca2+-binding protein (EF-Hand superfamily)	--		--	--	Os08g0117400; K13448 calcium-binding protein CML	Organismal Systems; Environmental Adaptation; Plant-pathogen interaction [PATH:ko04626]	Os08g0117400 [Oryza sativa Japonica Group] sp|Q84VG0.1|CML7_ORYSJ RecName: Full=Probable calcium-binding protein CML7; AltName: Full=Calmodulin-like protein 7 gb|AAO72641.1| putative serine/threonine kinase [Oryza sativa Japonica Group] dbj|BAD33100.1| putative calmodulin [Oryza sativa Japonica Group] dbj|BAF22776.1| Os08g0117400 [Oryza sativa Japonica Group] gb|EAZ05403.1| hypothetical protein OsI_27611 [Oryza sativa Indica Group] gb|EAZ41322.1| hypothetical protein OsJ_25832 [Oryza sativa Japonica Group] dbj|BAG96295.1| unnamed protein product [Oryza sativa Japonica Group] dbj|BAG87195.1| unnamed protein product [Oryza sativa Japonica Group]	Phyllostachys edulis cDNA clone: bphyst029h11, full insert sequence	Probable calcium-binding protein CML7 OS=Oryza sativa subsp. japonica GN=CML7 PE=2 SV=1	cDNA clone:006-208-D03, full insert sequence OS=Oryza sativa subsp. japonica PE=2 SV=1
Munro_Bamboo_unigene_BMK_12438; 1; bphylf043d17; -1	Serine/threonine protein kinase	--		Biological Process: protein phosphorylation (GO:0006468);; Molecular Function: ATP binding (GO:0005524);	Molecular Function: protein kinase activity (GO:0004672);	Molecular Function: protein serine/threonine kinase activity (GO:0004674);	Molecular Function: protein tyrosine kinase activity (GO:0004713);	Molecular Function: transferase activity, transferring phosphorus-containing groups (GO:0016772);	IPR000719: Protein kinase, catalytic domain; IPR001245: Serine-threonine/tyrosine-protein kinase	IPR002290: Serine/threonine-protein kinase, catalytic  domain	IPR008271: Serine/threonine-protein kinase, active site	IPR011009: Protein kinase-like domain	IPR017441: Protein kinase, ATP binding site	IPR020635: Tyrosine-protein kinase, catalytic domain	Os03g0816100	--	putative protein kinase [Oryza sativa Japonica Group] gb|ABF99545.1| Protein kinase domain containing protein, expressed [Oryza sativa Japonica Group] gb|EAZ29049.1| hypothetical protein OsJ_13102 [Oryza sativa Japonica Group]	Phyllostachys edulis cDNA clone: bphylf043d17, full insert sequence	Serine/threonine-protein kinase HT1 OS=Arabidopsis thaliana GN=HT1 PE=1 SV=1	Protein kinase domain containing protein, expressed OS=Oryza sativa subsp. japonica GN=OSJNBa0094J08.29 PE=4 SV=1
Munro_Bamboo_unigene_BMK_12446; 1; bphylf031g12; -1	UDP-glucose pyrophosphorylase	Carbohydrate transport and metabolism		Biological Process: metabolic process (GO:0008152);; Molecular Function: nucleotidyltransferase activity (GO:0016779);	IPR002618: UTP--glucose-1-phosphate uridylyltransferase; IPR016267: UTP--glucose-1-phosphate uridylyltransferase, subgroup	csu815; LOC100191846; K00963 UTP--glucose-1-phosphate uridylyltransferase [EC:2.7.7.9]	Metabolism; Carbohydrate Metabolism; Pentose and glucuronate interconversions [PATH:ko00040] Metabolism; Carbohydrate Metabolism; Galactose metabolism [PATH:ko00052] Metabolism; Carbohydrate Metabolism; Starch and sucrose metabolism [PATH:ko00500] Metabolism; Carbohydrate Metabolism; Amino sugar and nucleotide sugar metabolism [PATH:ko00520]	UDP-glucose pyrophosphorylase [Bambusa oldhamii]	Bambusa oldhamii UDP-glucose pyrophosphorylase mRNA, complete cds	UTP--glucose-1-phosphate uridylyltransferase OS=Hordeum vulgare PE=2 SV=1	UDP-glucose pyrophosphorylase OS=Bambusa oldhamii PE=2 SV=1
Munro_Bamboo_unigene_BMK_12471; 1; bphyem207h17; 1; bphylf025o10; 1; bphylf027a10; 1	SAM-dependent methyltransferases	--		Biological Process: metabolic process (GO:0008152);; Biological Process: steroid biosynthetic process (GO:0006694);	Molecular Function: methyltransferase activity (GO:0008168);	IPR013216: Methyltransferase type 11; IPR013705: Sterol methyltransferase C-terminal	hypothetical protein; K00559 sterol 24-C-methyltransferase [EC:2.1.1.41]	Metabolism; Lipid Metabolism; Steroid biosynthesis [PATH:ko00100]	hypothetical protein SORBIDRAFT_09g029600 [Sorghum bicolor] gb|EES20006.1| hypothetical protein SORBIDRAFT_09g029600 [Sorghum bicolor]	Phyllostachys edulis cDNA clone: bphylf025o10, full insert sequence	Cycloartenol-C-24-methyltransferase 1 OS=Oryza sativa subsp. japonica GN=Smt1-1 PE=2 SV=1	Putative uncharacterized protein Sb09g029600 OS=Sorghum bicolor GN=Sb09g029600 PE=4 SV=1
Munro_Bamboo_unigene_BMK_12497; 1; bphyst030p20; -1	--	--	--	IPR004241: Autophagy protein Atg8 ubiquitin-like	Atg8e; autophagy-related 8e; K08341 GABA(A) receptor-associated protein (autophagy-related protein 8)	Genetic Information Processing; Folding, Sorting and Degradation; Ubiquitin system [BR:ko04121] Cellular Processes; Transport and Catabolism; Regulation of autophagy [PATH:ko04140]	hypothetical protein SORBIDRAFT_07g005440 [Sorghum bicolor] gb|EES13484.1| hypothetical protein SORBIDRAFT_07g005440 [Sorghum bicolor]	Phyllostachys edulis cDNA clone: bphyst036f08, full insert sequence	Autophagy-related protein 8C OS=Oryza sativa subsp. japonica GN=ATG8C PE=2 SV=1	Putative uncharacterized protein Sb07g005440 OS=Sorghum bicolor GN=Sb07g005440 PE=3 SV=1
Munro_Bamboo_unigene_BMK_12524; 1; bphylf037n01; -1	--	--	--	IPR006946: Protein of unknown function DUF642; IPR008979: Galactose-binding domain-like	Os01g0756600	--	Os01g0756600 [Oryza sativa Japonica Group] dbj|BAB90140.1| unknown protein [Oryza sativa Japonica Group] dbj|BAF06203.1| Os01g0756600 [Oryza sativa Japonica Group] gb|EAZ13587.1| hypothetical protein OsJ_03503 [Oryza sativa Japonica Group] dbj|BAG87661.1| unnamed protein product [Oryza sativa Japonica Group] dbj|BAG95522.1| unnamed protein product [Oryza sativa Japonica Group]	Phyllostachys edulis cDNA clone: bphylf037n01, full insert sequence	--	Os01g0756600 protein OS=Oryza sativa subsp. japonica GN=OJ1414_E05.5 PE=2 SV=1
Munro_Bamboo_unigene_BMK_12600; 1; bphylf003m21; 1	Ribosomal protein L11	Translation, ribosomal structure and biogenesis		Biological Process: translation (GO:0006412);; Cellular Component: ribosome (GO:0005840);	Molecular Function: structural constituent of ribosome (GO:0003735);	IPR000911: Ribosomal protein L11; IPR006519: Ribosomal protein L11, bacterial-type	IPR020783: Ribosomal protein L11, C-terminal	IPR020784: Ribosomal protein L11, N-terminal	IPR020785: Ribosomal protein L11, conserved site	Os03g0122200; K02867 large subunit ribosomal protein L11	Genetic Information Processing; Translation; Ribosome [PATH:ko03010] Genetic Information Processing; Translation; Ribosome [BR:ko03011]	Os03g0122200 [Oryza sativa Japonica Group] dbj|BAB21483.1| plastid ribosomal protein L11 [Oryza sativa Japonica Group] gb|ABF93705.1| 50S ribosomal protein L11, chloroplast precursor, putative, expressed [Oryza sativa Japonica Group] dbj|BAF10712.1| Os03g0122200 [Oryza sativa Japonica Group] dbj|BAG89332.1| unnamed protein product [Oryza sativa Japonica Group] gb|EEE58239.1| hypothetical protein OsJ_09220 [Oryza sativa Japonica Group]	Phyllostachys edulis cDNA clone: bphylf003m21, full insert sequence	50S ribosomal protein L11, chloroplastic OS=Arabidopsis thaliana GN=RPL11 PE=1 SV=1	50S ribosomal protein L11, chloroplast, putative, expressed OS=Oryza sativa subsp. japonica GN=Os03g0122200 PE=2 SV=1
Munro_Bamboo_unigene_BMK_12632; 1; bphylf033i07; -1	Karyopherin (importin) alpha	Intracellular trafficking, secretion, and vesicular transport		--	--	Os01g0253300	--	hypothetical protein OsI_01208 [Oryza sativa Indica Group]	Phyllostachys edulis cDNA clone: bphylf033i07, full insert sequence	Importin subunit alpha-1a OS=Oryza sativa subsp. japonica GN=Os01g0253300 PE=1 SV=2	Putative uncharacterized protein OS=Oryza sativa subsp. indica GN=OsI_01208 PE=4 SV=1
Munro_Bamboo_unigene_BMK_12681; 1; bphylf045d01; 1	Ribosomal protein L1	Translation, ribosomal structure and biogenesis		Biological Process: translation (GO:0006412);; Cellular Component: intracellular (GO:0005622);	Cellular Component: large ribosomal subunit (GO:0015934);	Cellular Component: ribosome (GO:0005840);	Molecular Function: RNA binding (GO:0003723);	Molecular Function: structural constituent of ribosome (GO:0003735);	IPR002143: Ribosomal protein L1; IPR005878: Ribosomal protein L1, bacterial-type	IPR016094: Ribosomal protein L1, 2-layer alpha/beta-sandwich	IPR016095: Ribosomal protein L1, 3-layer alpha/beta-sandwich	IPR023673: Ribosomal protein L1, conserved site	IPR023674: Ribosomal protein L1, superfamily	50S ribosomal protein L1	--	50S ribosomal protein L1 [Zea mays] gb|ACG38486.1| 50S ribosomal protein L1 [Zea mays]	Phyllostachys edulis cDNA clone: bphylf045d01, full insert sequence	50S ribosomal protein L1, chloroplastic OS=Arabidopsis thaliana GN=RPL1 PE=1 SV=1	Ribosomal protein OS=Zea mays PE=2 SV=1
Munro_Bamboo_unigene_BMK_12851; 1; bphylf027j22; 1	Adenine/guanine phosphoribosyltransferases and related PRPP-binding proteins	Nucleotide transport and metabolism		Biological Process: adenine salvage (GO:0006168);; Biological Process: nucleoside metabolic process (GO:0009116);	Cellular Component: cytoplasm (GO:0005737);	Molecular Function: adenine phosphoribosyltransferase activity (GO:0003999);	IPR000836: Phosphoribosyltransferase; IPR005764: Adenine phosphoribosyl transferase	Os12g0589100; K00759 adenine phosphoribosyltransferase [EC:2.4.2.7]	Metabolism; Nucleotide Metabolism; Purine metabolism [PATH:ko00230]	Os12g0589100 [Oryza sativa Japonica Group] gb|ABA99757.1| Adenine phosphoribosyltransferase 1, putative, expressed [Oryza sativa Japonica Group] dbj|BAF30183.1| Os12g0589100 [Oryza sativa Japonica Group] dbj|BAG96420.1| unnamed protein product [Oryza sativa Japonica Group] dbj|BAG93559.1| unnamed protein product [Oryza sativa Japonica Group] dbj|BAG96967.1| unnamed protein product [Oryza sativa Japonica Group]	Phyllostachys edulis cDNA clone: bphylf027j22, full insert sequence	Adenine phosphoribosyltransferase 1 OS=Triticum aestivum GN=APT1 PE=2 SV=1	Adenine phosphoribosyltransferase 1, putative, expressed OS=Oryza sativa subsp. japonica GN=Os12g0589100 PE=2 SV=1
Munro_Bamboo_unigene_BMK_13085; 1; bphylf045p11; 1	--	--	Biological Process: transcription, DNA-dependent (GO:0006351);; Cellular Component: nucleus (GO:0005634);	Molecular Function: DNA binding (GO:0003677);	IPR003617: Transcription elongation factor, TFIIS/CRSP70, N-terminal, sub-type; IPR017923: Transcription factor IIS, N-terminal	Os07g0642600	--	hypothetical protein OsI_27066 [Oryza sativa Indica Group]	Phyllostachys edulis cDNA clone: bphylf045p11, full insert sequence	--	Os07g0642600 protein OS=Oryza sativa subsp. japonica GN=Os07g0642600 PE=4 SV=1
Munro_Bamboo_unigene_BMK_13121; 1; Munro_Bamboo_unigene_BMK_67344; -1; bphylf048f04; 1	--	--	--	--	hypothetical protein	--	hypothetical protein SORBIDRAFT_10g006230 [Sorghum bicolor] gb|EER87997.1| hypothetical protein SORBIDRAFT_10g006230 [Sorghum bicolor]	Phyllostachys edulis cDNA clone: bphylf048f04, full insert sequence	Probable pectinesterase/pectinesterase inhibitor 12 OS=Arabidopsis thaliana GN=PME12 PE=2 SV=1	Putative uncharacterized protein Sb10g006230 OS=Sorghum bicolor GN=Sb10g006230 PE=3 SV=1
Munro_Bamboo_unigene_BMK_13160; 1; bphylf049e19; 1	3-phosphoglycerate kinase	Carbohydrate transport and metabolism		--	--	phosphoglycerate kinase (EC:2.7.2.3); K00927 phosphoglycerate kinase [EC:2.7.2.3]	Metabolism; Carbohydrate Metabolism; Glycolysis / Gluconeogenesis [PATH:ko00010] Metabolism; Energy Metabolism; Carbon fixation in photosynthetic organisms [PATH:ko00710]	RecName: Full=Phosphoglycerate kinase, chloroplastic; Flags: Precursor emb|CAA33303.1| unnamed protein product [Triticum aestivum] emb|CAA51931.1| phosphoglycerate kinase [Triticum aestivum]	Phyllostachys edulis cDNA clone: bphylf049e19, full insert sequence	Phosphoglycerate kinase, chloroplastic OS=Triticum aestivum PE=2 SV=1	Phosphoglycerate kinase OS=Zea mays PE=2 SV=1
Munro_Bamboo_unigene_BMK_13178; 1; bphyem002k08; -1	Preprotein translocase subunit Sss1	Intracellular trafficking, secretion, and vesicular transport		--	--	Os02g0178400; K07342 protein transport protein SEC61 subunit gamma and related proteins	Genetic Information Processing; Folding, Sorting and Degradation; Protein export [PATH:ko03060] Genetic Information Processing; Folding, Sorting and Degradation; Protein processing in endoplasmic reticulum [PATH:ko04141] Environmental Information Processing; Membrane Transport; Secretion system [BR:ko02044] Cellular Processes; Transport and Catabolism; Phagosome [PATH:ko04145] Human Diseases; Infectious Diseases; Vibrio cholerae infection [PATH:ko05110]	Os02g0178400 [Oryza sativa Japonica Group] sp|P38385.1|SC61G_ORYSJ RecName: Full=Protein transport protein Sec61 subunit gamma dbj|BAD27997.1| transport protein SEC61 [Oryza sativa Japonica Group] dbj|BAF07990.1| Os02g0178400 [Oryza sativa Japonica Group] gb|EAY84716.1| hypothetical protein OsI_06084 [Oryza sativa Indica Group] gb|EAZ21956.1| hypothetical protein OsJ_05608 [Oryza sativa Japonica Group] gb|ABR26051.1| protein transport protein sec61 gamma subunit [Oryza sativa Indica Group] dbj|BAG88874.1| unnamed protein product [Oryza sativa Japonica Group] dbj|BAH00530.1| unnamed protein product [Oryza sativa Japonica Group]	Phyllostachys edulis cDNA clone: bphyem002k08, full insert sequence	Protein transport protein Sec61 subunit gamma OS=Oryza sativa subsp. japonica GN=Os02g0178400 PE=3 SV=1	Os02g0178400 protein OS=Oryza sativa subsp. japonica GN=Os02g0178400 PE=4 SV=1
Munro_Bamboo_unigene_BMK_13258; -1; Munro_Bamboo_unigene_BMK_39281; 1; bphyem123f14; 1	--	--	--	--	hypothetical protein; K14292 trimethylguanosine synthase [EC:2.1.1.-]	Genetic Information Processing; Translation; RNA transport [PATH:ko03013]	hypothetical protein SORBIDRAFT_01g033250 [Sorghum bicolor] gb|EER94739.1| hypothetical protein SORBIDRAFT_01g033250 [Sorghum bicolor]	Phyllostachys edulis cDNA clone: bphyem123f14, full insert sequence	Trimethylguanosine synthase OS=Mus musculus GN=Tgs1 PE=1 SV=2	Putative uncharacterized protein Sb01g033250 OS=Sorghum bicolor GN=Sb01g033250 PE=4 SV=1
Munro_Bamboo_unigene_BMK_13335; 1; bphyst032d14; 1	--	--	--	--	--	--	--	Phyllostachys edulis cDNA clone: bphyst032d14, full insert sequence	--	--
Munro_Bamboo_unigene_BMK_13415; 1; Munro_Bamboo_unigene_BMK_16256; -1; Munro_Bamboo_unigene_BMK_40611; -1; bphyem205k10; 1	Serine/threonine protein kinase	--		Biological Process: protein phosphorylation (GO:0006468);; Molecular Function: ATP binding (GO:0005524);	Molecular Function: protein kinase activity (GO:0004672);	Molecular Function: transferase activity, transferring phosphorus-containing groups (GO:0016772);	IPR000719: Protein kinase, catalytic domain; IPR011009: Protein kinase-like domain	IPR017442: Serine/threonine-protein kinase-like domain	Os03g0339900	--	hypothetical protein OsJ_10776 [Oryza sativa Japonica Group]	Phyllostachys edulis cDNA clone: bphyem205k10, full insert sequence	CBL-interacting protein kinase 10 OS=Oryza sativa subsp. japonica GN=CIPK10 PE=2 SV=1	Putative uncharacterized protein OS=Oryza sativa subsp. japonica GN=OsJ_10776 PE=4 SV=1
Munro_Bamboo_unigene_BMK_13629; -1; Munro_Bamboo_unigene_BMK_62306; 1; bphyem110g13; 1; bphyem205d18; 1	ADP-ribose pyrophosphatase	Nucleotide transport and metabolism		--	--	hypothetical protein LOC100272585	--	hypothetical protein OsI_32323 [Oryza sativa Indica Group] gb|EEE70189.1| hypothetical protein OsJ_30270 [Oryza sativa Japonica Group]	Phyllostachys edulis cDNA clone: bphyem110g13, full insert sequence	Nudix hydrolase 23, chloroplastic OS=Arabidopsis thaliana GN=NUDT23 PE=1 SV=2	Putative uncharacterized protein OS=Oryza sativa subsp. japonica GN=OsJ_30270 PE=4 SV=1
Munro_Bamboo_unigene_BMK_13673; 1; bphyem001e03; 1; bphylf002b10; 1; bphyst011n17; 1	--	--	Biological Process: photosynthesis (GO:0015979);; Cellular Component: oxygen evolving complex (GO:0009654);	Cellular Component: photosystem II (GO:0009523);	Cellular Component: thylakoid membrane (GO:0042651);	IPR006814: Photosystem II PsbR	Os07g0147500; K03541 photosystem II 10kDa protein	Metabolism; Energy Metabolism; Photosynthesis [PATH:ko00195] Metabolism; Energy Metabolism; Photosynthesis proteins [BR:ko00194]	Os07g0147500 [Oryza sativa Japonica Group] dbj|BAC15975.1| putative photosystem II 10 kD polypeptide [Oryza sativa Japonica Group] dbj|BAD30534.1| putative photosystem II 10 kD polypeptide [Oryza sativa Japonica Group] dbj|BAF20800.1| Os07g0147500 [Oryza sativa Japonica Group] dbj|BAG88237.1| unnamed protein product [Oryza sativa Japonica Group] gb|EEC81513.1| hypothetical protein OsI_24891 [Oryza sativa Indica Group]	Phyllostachys edulis cDNA clone: bphyst011n17, full insert sequence	Photosystem II 10 kDa polypeptide, chloroplastic OS=Hordeum vulgare GN=PSBR PE=3 SV=1	Os07g0147500 protein OS=Oryza sativa subsp. japonica GN=OJ1470_H06.117 PE=2 SV=1
Munro_Bamboo_unigene_BMK_13712; 1; bphyst011f01; -1	Thiol-disulfide isomerase and thioredoxins	--		Biological Process: mitosis (GO:0007067);; Cellular Component: spliceosomal complex (GO:0005681);	IPR004123: mRNA splicing factor, thioredoxin-like U5 snRNP; IPR012336: Thioredoxin-like fold	pco104916; LOC100282486; K12859 U5 snRNP protein, DIM1 family	Genetic Information Processing; Transcription; Spliceosome [PATH:ko03040] Genetic Information Processing; Transcription; Spliceosome [BR:ko03041]	hypothetical protein OsI_34094 [Oryza sativa Indica Group]	Phyllostachys edulis cDNA clone: bphyst011f01, full insert sequence	Thioredoxin-like protein 4A OS=Mus musculus GN=Txnl4a PE=2 SV=1	Putative uncharacterized protein OS=Oryza sativa subsp. indica GN=OsI_34094 PE=4 SV=1
Munro_Bamboo_unigene_BMK_1391; 1; bphylf045d08; -1	--	--	--	--	Os10g0564200	--	Os10g0564200 [Oryza sativa Japonica Group] gb|AAG60191.1|AC084763_11 hypothetical protein [Oryza sativa Japonica Group] gb|AAP55043.1| expressed protein [Oryza sativa Japonica Group] dbj|BAF27246.1| Os10g0564200 [Oryza sativa Japonica Group] gb|EAY79546.1| hypothetical protein OsI_34675 [Oryza sativa Indica Group]	Phyllostachys edulis cDNA clone: bphylf045d08, full insert sequence	Actin cytoskeleton-regulatory complex protein pan-1 OS=Neurospora crassa GN=pan-1 PE=3 SV=1	Putative uncharacterized protein OSJNBa0027P10.21 OS=Oryza sativa GN=OSJNBa0027P10.21 PE=4 SV=1
Munro_Bamboo_unigene_BMK_14020; 1; bphyem107m20; -1	--	--	--	IPR002885: Pentatricopeptide repeat	EMB1417	--	hypothetical protein OsJ_03510 [Oryza sativa Japonica Group]	Phyllostachys edulis cDNA clone: bphyem107m20, full insert sequence	Pentatricopeptide repeat-containing protein At4g21190 OS=Arabidopsis thaliana GN=EMB1417 PE=2 SV=1	Putative uncharacterized protein OS=Oryza sativa subsp. japonica GN=OsJ_03510 PE=4 SV=1
Munro_Bamboo_unigene_BMK_1410; 1; bphyst019l08; 1	Predicted phosphatase/phosphohexomutase	General function prediction only		Biological Process: metabolic process (GO:0008152);; Molecular Function: catalytic activity (GO:0003824);	IPR005834: Haloacid dehalogenase-like hydrolase; IPR023214: HAD-like domain	Os05g0168300	--	unknown [Zea mays]	Phyllostachys edulis cDNA clone: bphyst019l08, full insert sequence	Phosphorylated carbohydrates phosphatase TM_1254 OS=Thermotoga maritima GN=TM_1254 PE=1 SV=1	Putative uncharacterized protein OS=Zea mays PE=2 SV=1
Munro_Bamboo_unigene_BMK_14104; 1; bphylf027k17; 1	--	--	--	--	hypothetical protein	--	hypothetical protein SORBIDRAFT_05g007010 [Sorghum bicolor] gb|EES08261.1| hypothetical protein SORBIDRAFT_05g007010 [Sorghum bicolor]	Phyllostachys edulis cDNA clone: bphylf027k17, full insert sequence	PHD finger protein At5g26210 OS=Arabidopsis thaliana GN=At5g26210 PE=1 SV=2	Putative uncharacterized protein Sb05g007010 OS=Sorghum bicolor GN=Sb05g007010 PE=4 SV=1
Munro_Bamboo_unigene_BMK_14107; 1; bphyem106j08; -1	--	--	--	IPR007736: Caleosin	caleosin	--	hypothetical protein OsI_10569 [Oryza sativa Indica Group] dbj|BAH01599.1| unnamed protein product [Oryza sativa Japonica Group]	Phyllostachys edulis cDNA clone: bphyem106j08, full insert sequence	--	Caleosin, putative, expressed OS=Oryza sativa subsp. japonica GN=OJ1743A09.14 PE=4 SV=1
Munro_Bamboo_unigene_BMK_14146; 1; bphylf052a22; 1	--	--	--	IPR006917: SOUL haem-binding protein; IPR011256: Regulatory factor, effector, bacterial	Os01g0210500	--	Os01g0210500 [Oryza sativa Japonica Group] dbj|BAA96146.1| putative heme binding protein 2 [Oryza sativa Japonica Group] dbj|BAA96188.1| putative heme binding protein 2 [Oryza sativa Japonica Group] dbj|BAF04282.1| Os01g0210500 [Oryza sativa Japonica Group] gb|EAY72986.1| hypothetical protein OsI_00859 [Oryza sativa Indica Group] gb|EAZ11000.1| hypothetical protein OsJ_00844 [Oryza sativa Japonica Group] dbj|BAG90864.1| unnamed protein product [Oryza sativa Japonica Group] dbj|BAG92636.1| unnamed protein product [Oryza sativa Japonica Group] dbj|BAG96598.1| unnamed protein product [Oryza sativa Japonica Group]	Phyllostachys edulis cDNA clone: bphylf052a22, full insert sequence	Heme-binding protein 2 OS=Homo sapiens GN=HEBP2 PE=1 SV=1	Os01g0210500 protein OS=Oryza sativa subsp. japonica GN=P0466B10.23 PE=2 SV=1
Munro_Bamboo_unigene_BMK_14234; 1; Munro_Bamboo_unigene_BMK_43800; 1; bphyem118o03; -1	--	--	--	--	hypothetical protein LOC100191307	--	hypothetical protein LOC100191307 [Zea mays] gb|ACF78367.1| unknown [Zea mays] gb|ACN35875.1| unknown [Zea mays]	Phyllostachys edulis cDNA clone: bphyem118o03, full insert sequence	GDSL esterase/lipase At4g26790 OS=Arabidopsis thaliana GN=At4g26790 PE=2 SV=1	Putative uncharacterized protein OS=Zea mays PE=2 SV=1
Munro_Bamboo_unigene_BMK_14457; 1; bphylf044c03; 1	--	--	--	--	hypothetical protein	--	H0701F11.1 [Oryza sativa Indica Group] emb|CAH68364.1| H0723C07.14 [Oryza sativa Indica Group] gb|EAY96129.1| hypothetical protein OsI_18008 [Oryza sativa Indica Group]	Phyllostachys edulis cDNA clone: bphylf044c03, full insert sequence	Sulfated surface glycoprotein 185 OS=Volvox carteri PE=1 SV=1	H0701F11.1 protein OS=Oryza sativa GN=H0701F11.1 PE=4 SV=1
Munro_Bamboo_unigene_BMK_1449; 1; bphyem112b16; -1	--	--	Biological Process: transmembrane transport (GO:0055085);; Biological Process: transport (GO:0006810);	Cellular Component: mitochondrial inner membrane (GO:0005743);	Molecular Function: binding (GO:0005488);	Molecular Function: calcium ion binding (GO:0005509);	IPR002067: Mitochondrial carrier protein; IPR011992: EF-hand-like domain	IPR018108: Mitochondrial substrate/solute carrier	IPR018247: EF-Hand 1, calcium-binding site	IPR018249: EF-HAND 2	IPR023395: Mitochondrial carrier domain	hypothetical protein LOC100279872	--	hypothetical protein SORBIDRAFT_10g023640 [Sorghum bicolor] gb|EER88619.1| hypothetical protein SORBIDRAFT_10g023640 [Sorghum bicolor]	Phyllostachys edulis cDNA clone: bphyem112b16, full insert sequence	Calcium-binding mitochondrial carrier protein SCaMC-3 OS=Homo sapiens GN=SLC25A23 PE=1 SV=2	Putative uncharacterized protein Sb10g023640 OS=Sorghum bicolor GN=Sb10g023640 PE=3 SV=1
Munro_Bamboo_unigene_BMK_14516; 1; bphyst037f24; -1	--	--	--	--	hypothetical protein	--	hypothetical protein SORBIDRAFT_09g001790 [Sorghum bicolor] gb|EES17606.1| hypothetical protein SORBIDRAFT_09g001790 [Sorghum bicolor]	Phyllostachys edulis cDNA clone: bphyst037f24, full insert sequence	Nudix hydrolase 9 OS=Arabidopsis thaliana GN=NUDT9 PE=2 SV=1	Putative uncharacterized protein Sb09g001790 OS=Sorghum bicolor GN=Sb09g001790 PE=4 SV=1
Munro_Bamboo_unigene_BMK_14536; 1; bphyem002g01; 1	Thiol-disulfide isomerase and thioredoxins	--		Biological Process: cell redox homeostasis (GO:0045454);; Biological Process: glycerol ether metabolic process (GO:0006662);	Molecular Function: electron carrier activity (GO:0009055);	Molecular Function: protein disulfide oxidoreductase activity (GO:0015035);	IPR005746: Thioredoxin; IPR012336: Thioredoxin-like fold	IPR013766: Thioredoxin domain	IPR017937: Thioredoxin, conserved site	Os03g0800700; K03671 thioredoxin 1	Genetic Information Processing; Folding, Sorting and Degradation; Chaperones and folding catalysts [BR:ko03110]	thioredoxin h [Triticum aestivum]	Phyllostachys edulis cDNA clone: bphyem002g01, full insert sequence	Thioredoxin H2-2 OS=Oryza sativa subsp. japonica GN=Os03g0800700 PE=2 SV=1	Thioredoxin h OS=Triticum aestivum PE=2 SV=1
Munro_Bamboo_unigene_BMK_14575; 1; bphylfb50p14; -1	--	--	Biological Process: oxidation-reduction process (GO:0055114);; Biological Process: response to oxidative stress (GO:0006979);	Molecular Function: heme binding (GO:0020037);	Molecular Function: peroxidase activity (GO:0004601);	IPR000823: Plant peroxidase; IPR002016: Haem peroxidase, plant/fungal/bacterial	IPR010255: Haem peroxidase	IPR019793: Peroxidases heam-ligand binding site	Os03g0762400	--	Os03g0762400 [Oryza sativa Japonica Group] gb|AAL34128.1|AC090713_15 putative peroxidase [Oryza sativa Japonica Group] tpe|CAH69293.1| TPA: class III peroxidase 51 precursor [Oryza sativa Japonica Group] gb|ABF99017.1| Peroxidase 35 precursor, putative, expressed [Oryza sativa Japonica Group] dbj|BAF13274.1| Os03g0762400 [Oryza sativa Japonica Group] gb|EAY91950.1| hypothetical protein OsI_13637 [Oryza sativa Indica Group] gb|EAZ28674.1| hypothetical protein OsJ_12685 [Oryza sativa Japonica Group] dbj|BAG92358.1| unnamed protein product [Oryza sativa Japonica Group]	Phyllostachys edulis cDNA clone: bphylfb50p14, full insert sequence	Peroxidase 35 OS=Arabidopsis thaliana GN=PER35 PE=1 SV=1	Class III peroxidase 51 OS=Oryza sativa subsp. japonica GN=OSJNBa0002J24.4 PE=2 SV=1
Munro_Bamboo_unigene_BMK_1467; 1; bphylf055d06; 1; bphyst037e21; 1	--	--	--	--	Os03g0836500	--	Os03g0836500 [Oryza sativa Japonica Group] gb|ABF99763.1| expressed protein [Oryza sativa Japonica Group] gb|ABF99764.1| expressed protein [Oryza sativa Japonica Group] gb|ABF99765.1| expressed protein [Oryza sativa Japonica Group] dbj|BAF13739.1| Os03g0836500 [Oryza sativa Japonica Group] dbj|BAH00074.1| unnamed protein product [Oryza sativa Japonica Group]	Phyllostachys edulis cDNA clone: bphylf055d06, full insert sequence	--	Expressed protein OS=Oryza sativa subsp. japonica GN=Os03g0836500 PE=4 SV=1
Munro_Bamboo_unigene_BMK_1473; 1; bphylf045a14; -1	--	--	Molecular Function: zinc ion binding (GO:0008270);	IPR011016: Zinc finger, RING-CH-type; IPR013083: Zinc finger, RING/FYVE/PHD-type	Os06g0677300	--	hypothetical protein OsI_24153 [Oryza sativa Indica Group]	Phyllostachys edulis cDNA clone: bphylf045a14, full insert sequence	--	Putative uncharacterized protein OS=Oryza sativa subsp. indica GN=OsI_24153 PE=4 SV=1
Munro_Bamboo_unigene_BMK_14784; 1; bphyst005d05; 1	--	--	--	IPR009653: Protein of unknown function DUF1242	Os02g0299600	--	hypothetical protein [Zea mays] gb|ACN27916.1| unknown [Zea mays] gb|ACN28615.1| unknown [Zea mays]	Phyllostachys edulis cDNA clone: bphyst005d05, full insert sequence	Protein kish OS=Drosophila melanogaster GN=kish PE=3 SV=1	Putative uncharacterized protein OS=Zea mays PE=4 SV=1
Munro_Bamboo_unigene_BMK_14792; 1; bphyst027a23; 1	Ribosomal protein L34E	Translation, ribosomal structure and biogenesis		--	--	60S ribosomal protein L34	--	60S ribosomal protein L34 [Zea mays] gb|ACG48648.1| 60S ribosomal protein L34 [Zea mays]	Phyllostachys edulis cDNA clone: bphyst027a23, full insert sequence	60S ribosomal protein L34 OS=Nicotiana tabacum GN=RPL34 PE=2 SV=1	60S ribosomal protein L34 OS=Zea mays PE=2 SV=1
Munro_Bamboo_unigene_BMK_14936; 1; bphyem124m01; 1; bphylf037b09; 1	--	--	--	IPR006628: PUR-alpha/beta/gamma, DNA/RNA-binding	hypothetical protein LOC100274069	--	hypothetical protein OsI_01264 [Oryza sativa Indica Group]	Phyllostachys edulis cDNA clone: bphylf037b09, full insert sequence	Transcription factor Pur-alpha 1 OS=Arabidopsis thaliana GN=PURA1 PE=1 SV=2	Putative uncharacterized protein OS=Oryza sativa subsp. indica GN=OsI_01264 PE=4 SV=1
Munro_Bamboo_unigene_BMK_14940; 1; Munro_Bamboo_unigene_BMK_59845; 1; bphyst038b19; 1	--	--	--	--	Os03g0274700	--	hypothetical protein OsI_10945 [Oryza sativa Indica Group]	Phyllostachys edulis cDNA clone: bphyst038b19, full insert sequence	--	Putative uncharacterized protein OS=Oryza sativa subsp. indica GN=OsI_10945 PE=4 SV=1
Munro_Bamboo_unigene_BMK_150; 1; bphylf026m17; 1	Superfamily II DNA and RNA helicases	--		Molecular Function: ATP binding (GO:0005524);; Molecular Function: ATP-dependent helicase activity (GO:0008026);	Molecular Function: helicase activity (GO:0004386);	Molecular Function: nucleic acid binding (GO:0003676);	IPR000629: RNA helicase, ATP-dependent, DEAD-box, conserved site; IPR001650: Helicase, C-terminal	IPR011545: DNA/RNA helicase, DEAD/DEAH box type, N-terminal	IPR014001: DEAD-like helicase	IPR014014: RNA helicase, DEAD-box type, Q motif	RH2; RH2 protein-like; K13025 ATP-dependent RNA helicase [EC:3.6.4.13]	Genetic Information Processing; Transcription; Spliceosome [PATH:ko03040] Genetic Information Processing; Transcription; Spliceosome [BR:ko03041] Genetic Information Processing; Translation; Translation factors [BR:ko03012] Genetic Information Processing; Translation; RNA transport [PATH:ko03013] Genetic Information Processing; Translation; mRNA surveillance pathway [PATH:ko03015]	putative RH2 protein [Zea mays] gb|ABC55720.1| putative RH2 protein [Zea mays] gb|ABQ10647.1| RNA helicase 2 [Zea mays] gb|ACF84351.1| unknown [Zea mays]	Phyllostachys edulis cDNA clone: bphylf026m17, full insert sequence	DEAD-box ATP-dependent RNA helicase 2 OS=Oryza sativa subsp. japonica GN=Os01g0639100 PE=2 SV=1	Putative RH2 protein OS=Zea mays GN=RH2 PE=2 SV=1
Munro_Bamboo_unigene_BMK_15250; 1; bphylf026l08; 1	Thiol-disulfide isomerase and thioredoxins	--		Biological Process: cell redox homeostasis (GO:0045454);	IPR012336: Thioredoxin-like fold; IPR012936: Domain of unknown function DUF1692	IPR013766: Thioredoxin domain	Os07g0524100	--	Os07g0524100 [Oryza sativa Japonica Group] sp|Q69SA9.1|PDI54_ORYSJ RecName: Full=Protein disulfide isomerase-like 5-4; Short=OsPDIL5-4; AltName: Full=Protein disulfide isomerase-like 8-1; Short=OsPDIL8-1; Flags: Precursor dbj|BAD30858.1| thioredoxin family-like protein [Oryza sativa Japonica Group] dbj|BAF21735.1| Os07g0524100 [Oryza sativa Japonica Group] dbj|BAG94243.1| unnamed protein product [Oryza sativa Japonica Group] gb|EEC82169.1| hypothetical protein OsI_26259 [Oryza sativa Indica Group] gb|EEE67299.1| hypothetical protein OsJ_24505 [Oryza sativa Japonica Group]	Phyllostachys edulis cDNA clone: bphylf026l08, full insert sequence	Protein disulfide isomerase-like 5-4 OS=Oryza sativa subsp. japonica GN=PDIL5-4 PE=2 SV=1	Putative uncharacterized protein OS=Oryza sativa subsp. indica GN=OsI_26259 PE=4 SV=1
Munro_Bamboo_unigene_BMK_15279; 1; bphyst016f24; -1	--	--	--	--	hypothetical protein	--	hypothetical protein SORBIDRAFT_03g009050 [Sorghum bicolor] gb|EES02659.1| hypothetical protein SORBIDRAFT_03g009050 [Sorghum bicolor]	Phyllostachys edulis cDNA clone: bphyst016f24, full insert sequence	--	Os01g0102500 protein OS=Oryza sativa subsp. japonica GN=P0672D08.44 PE=4 SV=1
Munro_Bamboo_unigene_BMK_15413; 1; bphylf060f16; 1	Nucleoside-diphosphate-sugar epimerases	--		Biological Process: cellular metabolic process (GO:0044237);; Molecular Function: catalytic activity (GO:0003824);	Molecular Function: coenzyme binding (GO:0050662);	Molecular Function: nucleotide binding (GO:0000166);	IPR001509: NAD-dependent epimerase/dehydratase; IPR016040: NAD(P)-binding domain	Os11g0591100	--	hypothetical protein OsI_19576 [Oryza sativa Indica Group]	Phyllostachys edulis cDNA clone: bphylf060f16, full insert sequence	GDP-mannose 3,5-epimerase 2 OS=Oryza sativa subsp. japonica GN=GME-2 PE=2 SV=2	Os11g0591100 protein OS=Oryza sativa subsp. japonica GN=Os11g0591100 PE=4 SV=1
Munro_Bamboo_unigene_BMK_15460; -1; Munro_Bamboo_unigene_BMK_55135; 1; bphyem213m16; 1	Serine/threonine protein kinase	--		Biological Process: protein phosphorylation (GO:0006468);; Molecular Function: ATP binding (GO:0005524);	Molecular Function: protein kinase activity (GO:0004672);	Molecular Function: protein serine/threonine kinase activity (GO:0004674);	Molecular Function: transferase activity, transferring phosphorus-containing groups (GO:0016772);	IPR000719: Protein kinase, catalytic domain; IPR002290: Serine/threonine-protein kinase, catalytic  domain	IPR008271: Serine/threonine-protein kinase, active site	IPR011009: Protein kinase-like domain	IPR017441: Protein kinase, ATP binding site	IPR017442: Serine/threonine-protein kinase-like domain	Os05g0549100	--	Os05g0549100 [Oryza sativa Japonica Group] dbj|BAF18147.1| Os05g0549100 [Oryza sativa Japonica Group] gb|EEC79643.1| hypothetical protein OsI_20870 [Oryza sativa Indica Group] gb|EEE64591.1| hypothetical protein OsJ_19443 [Oryza sativa Japonica Group]	Phyllostachys edulis cDNA clone: bphyem213m16, full insert sequence	Serine/threonine-protein kinase STN7, chloroplastic OS=Arabidopsis thaliana GN=STN7 PE=1 SV=1	Os05g0549100 protein OS=Oryza sativa subsp. japonica GN=Os05g0549100 PE=4 SV=1
Munro_Bamboo_unigene_BMK_15462; 1; bphyem003k16; 1; bphyst006g10; 1	--	--	--	--	--	--	--	Phyllostachys edulis cDNA clone: bphyst006g10, full insert sequence	--	--
Munro_Bamboo_unigene_BMK_15473; 1; bphyst001p21; -1	--	--	--	--	hypothetical protein	--	unknown [Zea mays]	Bambusa oldhamii mitochondrion, complete genome	Uncharacterized mitochondrial protein AtMg00030 OS=Arabidopsis thaliana GN=AtMg00030 PE=4 SV=1	Putative uncharacterized protein OS=Zea mays PE=4 SV=1
Munro_Bamboo_unigene_BMK_15517; 1; bphylf003l18; -1; bphylf047f22; -1	--	--	--	--	Os08g0460000	--	Os08g0460000 [Oryza sativa Japonica Group] sp|Q6ZBZ2.1|GL814_ORYSJ RecName: Full=Germin-like protein 8-14; AltName: Full=Germin-like protein 1; AltName: Full=Germin-like protein 5; Short=OsGER5; Flags: Precursor gb|AAC04836.1| germin-like protein 5 [Oryza sativa Japonica Group] dbj|BAB17848.1| germin-like protein 1 [Oryza sativa (japonica cultivar-group)] dbj|BAD09603.1| germin-like protein [Oryza sativa Japonica Group] dbj|BAD09958.1| germin-like protein [Oryza sativa Japonica Group] dbj|BAF23890.1| Os08g0460000 [Oryza sativa Japonica Group] gb|EAZ07240.1| hypothetical protein OsI_29484 [Oryza sativa Indica Group] gb|EAZ42986.1| hypothetical protein OsJ_27575 [Oryza sativa Japonica Group] dbj|BAG89446.1| unnamed protein product [Oryza sativa Japonica Group] dbj|BAG96911.1| unnamed protein product [Oryza sativa Japonica Group]	Phyllostachys edulis cDNA clone: bphylf003l18, full insert sequence	Germin-like protein 8-14 OS=Oryza sativa subsp. japonica GN=GER5 PE=1 SV=1	Putative uncharacterized protein OS=Oryza sativa subsp. indica GN=OsI_29484 PE=4 SV=1
Munro_Bamboo_unigene_BMK_15530; 1; bphylf044h02; -1	--	--	--	IPR007877: Protein of unknown function DUF707	lysine ketoglutarate reductase trans-splicing related 1	--	lysine ketoglutarate reductase trans-splicing related 1 [Zea mays] gb|ACG37370.1| lysine ketoglutarate reductase trans-splicing related 1 [Zea mays] gb|ACN26060.1| unknown [Zea mays] gb|ACN27550.1| unknown [Zea mays] gb|ACN28090.1| unknown [Zea mays]	Phyllostachys edulis cDNA clone: bphylf044h02, full insert sequence	--	Lysine ketoglutarate reductase trans-splicing related 1 OS=Zea mays PE=2 SV=1
Munro_Bamboo_unigene_BMK_15587; 1; Munro_Bamboo_unigene_BMK_52012; -1; bphyem207k03; 1	--	--	--	IPR019149: Protein of unknown function DUF2048	cl8338_1; LOC100276119	--	unknown [Zea mays]	Phyllostachys edulis cDNA clone: bphyem207k03, full insert sequence	--	Putative uncharacterized protein OS=Zea mays PE=2 SV=1
Munro_Bamboo_unigene_BMK_15602; 1; bphyem121d04; 1	Acyl dehydratase	Lipid transport and metabolism		Biological Process: metabolic process (GO:0008152);; Molecular Function: oxidoreductase activity (GO:0016491);	IPR002539: MaoC-like dehydratase	pco075569; LOC100272552	--	hypothetical protein SORBIDRAFT_02g031670 [Sorghum bicolor] gb|EER99292.1| hypothetical protein SORBIDRAFT_02g031670 [Sorghum bicolor]	Phyllostachys edulis cDNA clone: bphyem121d04, full insert sequence	Enoyl-CoA hydratase 2, peroxisomal OS=Arabidopsis thaliana GN=ECH2 PE=1 SV=1	Putative uncharacterized protein Sb02g031670 OS=Sorghum bicolor GN=Sb02g031670 PE=4 SV=1
Munro_Bamboo_unigene_BMK_15653; 1; bphyst007a24; 1	Diadenosine tetraphosphate (Ap4A) hydrolase and other HIT family hydrolases	--		--	--	hypothetical protein; K01522 bis(5'-adenosyl)-triphosphatase [EC:3.6.1.29]	Metabolism; Nucleotide Metabolism; Purine metabolism [PATH:ko00230] Human Diseases; Cancers; Small cell lung cancer [PATH:ko05222] Human Diseases; Cancers; Non-small cell lung cancer [PATH:ko05223]	unknown [Zea mays]	Phyllostachys edulis cDNA clone: bphyst007a24, full insert sequence	Bis(5'-adenosyl)-triphosphatase OS=Dictyostelium discoideum GN=fhit PE=3 SV=1	Putative uncharacterized protein OS=Zea mays PE=2 SV=1
Munro_Bamboo_unigene_BMK_15720; 1; bphyst002g11; 1	--	--	Cellular Component: extracellular region (GO:0005576);	IPR007112: Expansin/pollen allergen, DPBB domain; IPR007118: Expansin/Lol pI	IPR009009: Barwin-related endoglucanase	IPR014733: Barwin-like endoglucanase	beta-expansin 3	--	hypothetical protein SORBIDRAFT_06g023380 [Sorghum bicolor] gb|EES11161.1| hypothetical protein SORBIDRAFT_06g023380 [Sorghum bicolor]	Phyllostachys edulis cDNA clone: bphyst002g11, full insert sequence	Expansin-B17 OS=Oryza sativa subsp. japonica GN=EXPB17 PE=3 SV=2	Putative uncharacterized protein Sb06g023380 OS=Sorghum bicolor GN=Sb06g023380 PE=3 SV=1
Munro_Bamboo_unigene_BMK_15764; 1; bphyst004h07; 1; bphyst006a03; 1	--	--	--	--	Os04g0411400	--	H0717B12.4 [Oryza sativa Indica Group] gb|EAY94026.1| hypothetical protein OsI_15804 [Oryza sativa Indica Group]	Phyllostachys edulis cDNA clone: bphyst004h07, full insert sequence	Protein SELF-PRUNING OS=Solanum lycopersicum GN=SP PE=2 SV=1	H0717B12.4 protein OS=Oryza sativa GN=H0717B12.4 PE=4 SV=1
Munro_Bamboo_unigene_BMK_15895; 1; Munro_Bamboo_unigene_BMK_39714; 1; bphyem116b13; -1	--	--	Biological Process: regulation of transcription from RNA polymerase II promoter (GO:0006357);; Cellular Component: Elongator holoenzyme complex (GO:0033588);	IPR008728: Elongator complex protein 4	Os06g0639600; K11375 elongator complex protein 4	Genetic Information Processing; Replication and Repair; Chromosome [BR:ko03036]	Os06g0639600 [Oryza sativa Japonica Group] dbj|BAD37537.1| Paxneb protein-like [Oryza sativa Japonica Group] dbj|BAD37489.1| Paxneb protein-like [Oryza sativa Japonica Group] dbj|BAF20075.1| Os06g0639600 [Oryza sativa Japonica Group] gb|EEE66086.1| hypothetical protein OsJ_22107 [Oryza sativa Japonica Group]	Phyllostachys edulis cDNA clone: bphyem116b13, full insert sequence	Elongator complex protein 4 OS=Homo sapiens GN=ELP4 PE=1 SV=2	Os06g0639600 protein OS=Oryza sativa subsp. japonica GN=P0523F01.44 PE=4 SV=1
Munro_Bamboo_unigene_BMK_15967; 1; bphylf030d16; -1; bphyst004h22; -1; bphyst005j23; -1; bphyst008k11; -1	Ribosomal protein L5	Translation, ribosomal structure and biogenesis		--	--	Os06g0550000	--	60S ribosomal protein l11 [Oryza sativa Indica Group]	Phyllostachys edulis cDNA clone: bphyst008k11, full insert sequence	60S ribosomal protein L11 OS=Oryza sativa subsp. japonica GN=RPL11 PE=2 SV=1	Putative uncharacterized protein OS=Oryza sativa subsp. indica GN=OsI_18846 PE=3 SV=1
Munro_Bamboo_unigene_BMK_16103; -1; Munro_Bamboo_unigene_BMK_16836; 1; bphylf034a24; 1	--	--	Molecular Function: transferase activity, transferring acyl groups other than amino-acyl groups (GO:0016747);	IPR003480: Transferase; IPR023213: Chloramphenicol acetyltransferase-like domain	hypothetical protein	--	hypothetical protein OsJ_21858 [Oryza sativa Japonica Group]	Phyllostachys edulis cDNA clone: bphylf034a24, full insert sequence	10-deacetylbaccatin III 10-O-acetyltransferase OS=Taxus cuspidata PE=1 SV=1	Putative 10-deacetylbaccatin III-10-O-acetyl transferase OS=Oryza sativa subsp. japonica GN=P0652A05.17 PE=4 SV=1
Munro_Bamboo_unigene_BMK_162; 1; bphyem209f21; -1	NAD-dependent aldehyde dehydrogenases	Energy production and conversion		Biological Process: metabolic process (GO:0008152);; Biological Process: oxidation-reduction process (GO:0055114);	Molecular Function: oxidoreductase activity (GO:0016491);	Molecular Function: oxidoreductase activity, acting on the aldehyde or oxo group of donors, NAD or NADP as acceptor (GO:0016620);	IPR010102: Succinic semialdehyde dehydrogenase; IPR015590: Aldehyde dehydrogenase domain	IPR016160: Aldehyde dehydrogenase, conserved site	IPR016161: Aldehyde/histidinol dehydrogenase	IPR016162: Aldehyde dehydrogenase, N-terminal	IPR016163: Aldehyde dehydrogenase, C-terminal	succinate semialdehyde dehydrogenase; K00135 succinate-semialdehyde dehydrogenase (NADP+) [EC:1.2.1.16]	Metabolism; Carbohydrate Metabolism; Butanoate metabolism [PATH:ko00650] Metabolism; Amino Acid Metabolism; Alanine, aspartate and glutamate metabolism [PATH:ko00250] Metabolism; Amino Acid Metabolism; Tyrosine metabolism [PATH:ko00350]	RecName: Full=Succinate-semialdehyde dehydrogenase, mitochondrial; AltName: Full=Aldehyde dehydrogenase family 5 member F1; AltName: Full=NAD(+)-dependent succinic semialdehyde dehydrogenase; Flags: Precursor gb|EEE56414.1| hypothetical protein OsJ_05574 [Oryza sativa Japonica Group]	Phyllostachys edulis cDNA clone: bphyem209f21, full insert sequence	Succinate-semialdehyde dehydrogenase, mitochondrial OS=Oryza sativa subsp. japonica GN=ALDH5F1 PE=2 SV=1	Putative uncharacterized protein OS=Oryza sativa subsp. indica GN=OsI_06045 PE=3 SV=1
Munro_Bamboo_unigene_BMK_16210; 1; bphyst031o01; -1	--	--	--	--	Os07g0637400	--	SNARE 13 [Oryza sativa Japonica Group]	Phyllostachys edulis cDNA clone: bphyst031o01, full insert sequence	Novel plant SNARE 13 OS=Arabidopsis thaliana GN=NPSN13 PE=1 SV=1	Os07g0637400 protein OS=Oryza sativa subsp. japonica GN=OJ1136_D11.130 PE=2 SV=1
Munro_Bamboo_unigene_BMK_16219; 1; bphyem205c08; -1	Actin and related proteins	Cytoskeleton		--	--	act2; actin2	--	hypothetical protein SORBIDRAFT_03g040880 [Sorghum bicolor] gb|EES01810.1| hypothetical protein SORBIDRAFT_03g040880 [Sorghum bicolor]	Phyllostachys edulis actin mRNA, complete cds	Actin-7 OS=Oryza sativa subsp. japonica GN=ACT7 PE=3 SV=1	Putative uncharacterized protein Sb03g040880 OS=Sorghum bicolor GN=Sb03g040880 PE=3 SV=1
Munro_Bamboo_unigene_BMK_16249; 1; Munro_Bamboo_unigene_BMK_20082; 1; bphyst004i24; -1; bphyst019h07; -1	RNA-binding proteins (RRM domain)	General function prediction only		--	--	pco082380(357); LOC100282268	--	LOC100282268 [Zea mays] gb|ACF82885.1| unknown [Zea mays] gb|ACG32390.1| MKI67 FHA domain-interacting nucleolar phosphoprotein-like [Zea mays]	Phyllostachys edulis cDNA clone: bphyst004i24, full insert sequence	MKI67 FHA domain-interacting nucleolar phosphoprotein-like OS=Xenopus tropicalis GN=mki67ipl PE=2 SV=1	Os08g0412200 protein OS=Oryza sativa subsp. japonica GN=OSJNBa0007M04.13 PE=2 SV=1
Munro_Bamboo_unigene_BMK_16313; 1; bphylf032m18; -1	GTPase SAR1 and related small G proteins	General function prediction only		Biological Process: GTP catabolic process (GO:0006184);; Biological Process: protein transport (GO:0015031);	Biological Process: signal transduction (GO:0007165);	Biological Process: small GTPase mediated signal transduction (GO:0007264);	Cellular Component: membrane (GO:0016020);	Molecular Function: GTP binding (GO:0005525);	Molecular Function: GTPase activity (GO:0003924);	IPR001806: Small GTPase superfamily; IPR003579: Small GTPase superfamily, Rab type	IPR020849: Small GTPase superfamily, Ras type	Os02g0586400; K07976 Rab family, other	Environmental Information Processing; Signaling Molecules and Interaction; GTP-binding proteins [BR:ko04031]	Os02g0586400 [Oryza sativa Japonica Group] dbj|BAD17483.1| putative GTP-binding protein yptm3 [Oryza sativa Japonica Group] dbj|BAF09181.1| Os02g0586400 [Oryza sativa Japonica Group] gb|EAY86464.1| hypothetical protein OsI_07846 [Oryza sativa Indica Group] gb|EAZ23604.1| hypothetical protein OsJ_07304 [Oryza sativa Japonica Group] dbj|BAG87725.1| unnamed protein product [Oryza sativa Japonica Group] dbj|BAG94446.1| unnamed protein product [Oryza sativa Japonica Group]	Phyllostachys edulis cDNA clone: bphylf032m18, full insert sequence	Ras-related protein Rab-2-B OS=Zea mays GN=RAB2B PE=2 SV=1	Os02g0586400 protein OS=Oryza sativa subsp. japonica GN=OSJNBb0056I22.32 PE=2 SV=1
Munro_Bamboo_unigene_BMK_16366; -1; Munro_Bamboo_unigene_BMK_36775; 1; bphylf050h13; 1	--	--	--	--	Os01g0598600	--	Os01g0598600 [Oryza sativa Japonica Group] dbj|BAB63755.1| nucleoid DNA-binding protein cnd41-like [Oryza sativa Japonica Group] dbj|BAF05399.1| Os01g0598600 [Oryza sativa Japonica Group] gb|EAY74816.1| hypothetical protein OsI_02707 [Oryza sativa Indica Group]	Phyllostachys edulis cDNA clone: bphylf050h13, full insert sequence	--	Nucleoid DNA-binding protein cnd41-like OS=Oryza sativa subsp. japonica GN=P0025A05.25 PE=4 SV=1
Munro_Bamboo_unigene_BMK_16450; 1; bphyem211d14; -1	Nucleoside-diphosphate-sugar epimerases	--		Biological Process: cellular metabolic process (GO:0044237);; Molecular Function: catalytic activity (GO:0003824);	Molecular Function: coenzyme binding (GO:0050662);	Molecular Function: nucleotide binding (GO:0000166);	IPR001509: NAD-dependent epimerase/dehydratase; IPR016040: NAD(P)-binding domain	Os12g0420200	--	Os12g0420200 [Oryza sativa Japonica Group] gb|ABA97622.2| RNA binding protein, putative, expressed [Oryza sativa Japonica Group] dbj|BAF29676.1| Os12g0420200 [Oryza sativa Japonica Group] gb|EEE53110.1| hypothetical protein OsJ_35887 [Oryza sativa Japonica Group]	Phyllostachys edulis cDNA clone: bphyem211d14, full insert sequence	Uncharacterized protein At1g09340, chloroplastic OS=Arabidopsis thaliana GN=At1g09340 PE=1 SV=1	Os12g0420200 protein OS=Oryza sativa subsp. japonica GN=Os12g0420200 PE=4 SV=2
Munro_Bamboo_unigene_BMK_16468; 1; bphylf055b07; -1	Serine/threonine protein kinase	--		Biological Process: protein phosphorylation (GO:0006468);; Molecular Function: ATP binding (GO:0005524);	Molecular Function: protein kinase activity (GO:0004672);	Molecular Function: protein serine/threonine kinase activity (GO:0004674);	Molecular Function: protein tyrosine kinase activity (GO:0004713);	Molecular Function: transferase activity, transferring phosphorus-containing groups (GO:0016772);	IPR000719: Protein kinase, catalytic domain; IPR001772: Kinase-associated KA1	IPR002290: Serine/threonine-protein kinase, catalytic  domain	IPR008271: Serine/threonine-protein kinase, active site	IPR011009: Protein kinase-like domain	IPR015940: Ubiquitin-associated/translation elongation factor EF1B, N-terminal, eukaryote	IPR017441: Protein kinase, ATP binding site	IPR017442: Serine/threonine-protein kinase-like domain	IPR020635: Tyrosine-protein kinase, catalytic domain	hypothetical protein; K07198 5'-AMP-activated protein kinase, catalytic alpha subunit [EC:2.7.11.11]	Metabolism; Enzyme Families; Protein kinases [BR:ko01001] Environmental Information Processing; Signal Transduction; mTOR signaling pathway [PATH:ko04150] Cellular Processes; Transport and Catabolism; Regulation of autophagy [PATH:ko04140] Organismal Systems; Endocrine System; Insulin signaling pathway [PATH:ko04910] Organismal Systems; Endocrine System; Adipocytokine signaling pathway [PATH:ko04920] Human Diseases; Cardiovascular Diseases; Hypertrophic cardiomyopathy (HCM) [PATH:ko05410]	hypothetical protein SORBIDRAFT_03g033530 [Sorghum bicolor] gb|EES01406.1| hypothetical protein SORBIDRAFT_03g033530 [Sorghum bicolor]	Phyllostachys edulis cDNA clone: bphylf055b07, full insert sequence	SNF1-related protein kinase catalytic subunit alpha KIN10 OS=Arabidopsis thaliana GN=KIN10 PE=1 SV=2	Putative uncharacterized protein Sb03g033530 OS=Sorghum bicolor GN=Sb03g033530 PE=4 SV=1
Munro_Bamboo_unigene_BMK_165; 1; bphyem211a07; -1	Ca2+-binding protein (EF-Hand superfamily)	--		Molecular Function: calcium ion binding (GO:0005509);	IPR002048: Calcium-binding EF-hand; IPR011992: EF-hand-like domain	IPR018247: EF-Hand 1, calcium-binding site	IPR018248: EF-hand	IPR018249: EF-HAND 2	Os05g0467000; K13412 calcium-dependent protein kinase [EC:2.7.11.1]	Metabolism; Enzyme Families; Protein kinases [BR:ko01001] Organismal Systems; Environmental Adaptation; Plant-pathogen interaction [PATH:ko04626] Human Diseases; Infectious Diseases; Toxoplasmosis [PATH:ko05145]	hypothetical protein OsJ_18852 [Oryza sativa Japonica Group]	Phyllostachys edulis cDNA clone: bphyem211a07, full insert sequence	Calcium-dependent protein kinase 13 OS=Arabidopsis thaliana GN=CPK13 PE=1 SV=2	Os05g0467000 protein OS=Oryza sativa subsp. japonica GN=OSJNBa0009E21.17 PE=4 SV=1
Munro_Bamboo_unigene_BMK_16520; 1; bphyst007c03; 1	--	--	Biological Process: carbohydrate metabolic process (GO:0005975);; Molecular Function: catalytic activity (GO:0003824);	Molecular Function: hydrolase activity, hydrolyzing O-glycosyl compounds (GO:0004553);	IPR001701: Glycoside hydrolase, family 9; IPR008928: Six-hairpin glycosidase-like	IPR012341: Six-hairpin glycosidase	IPR018221: Glycoside hydrolase, family 9, active site	hypothetical protein; K01179 endoglucanase [EC:3.2.1.4]	Metabolism; Carbohydrate Metabolism; Starch and sucrose metabolism [PATH:ko00500]	beta-1,4 glycosidase [Phyllostachys edulis]	Phyllostachys edulis beta-1,4 glycosidase mRNA, complete cds	Endoglucanase 10 OS=Oryza sativa subsp. japonica GN=GLU2 PE=2 SV=1	Beta-1,4 glycosidase OS=Phyllostachys edulis PE=2 SV=1
Munro_Bamboo_unigene_BMK_1654; 1; bphyem112a01; 1	--	--	Biological Process: regulation of transcription, DNA-dependent (GO:0006355);; Molecular Function: DNA binding (GO:0003677);	IPR003441: No apical meristem (NAM) protein	Os01g0675800	--	hypothetical protein OsI_03248 [Oryza sativa Indica Group]	Phyllostachys edulis cDNA clone: bphyem112a01, full insert sequence	Serine/arginine repetitive matrix protein 2 OS=Mus musculus GN=Srrm2 PE=1 SV=2	Putative uncharacterized protein OS=Oryza sativa subsp. indica GN=OsI_03248 PE=4 SV=1
Munro_Bamboo_unigene_BMK_16668; -1; Munro_Bamboo_unigene_BMK_7474; 1; bphylf002l05; 1	Predicted integral membrane protein	Function unknown		--	--	hypothetical protein; K02221 YggT family protein	Environmental Information Processing; Membrane Transport; Secretion system [BR:ko02044]	hypothetical protein SORBIDRAFT_03g047020 [Sorghum bicolor] gb|EES04284.1| hypothetical protein SORBIDRAFT_03g047020 [Sorghum bicolor]	Phyllostachys edulis cDNA clone: bphylf002l05, full insert sequence	--	Putative uncharacterized protein Sb03g047020 OS=Sorghum bicolor GN=Sb03g047020 PE=4 SV=1
Munro_Bamboo_unigene_BMK_16670; 1; bphylf056p09; 1	Thymidine kinase	Nucleotide transport and metabolism		Molecular Function: ATP binding (GO:0005524);; Molecular Function: thymidine kinase activity (GO:0004797);	IPR001267: Thymidine kinase; IPR020633: Thymidine kinase, conserved site	Os03g0113100; K00857 thymidine kinase [EC:2.7.1.21]	Metabolism; Nucleotide Metabolism; Pyrimidine metabolism [PATH:ko00240] Metabolism; Xenobiotics Biodegradation and Metabolism; Drug metabolism - other enzymes [PATH:ko00983]	Os03g0113100 [Oryza sativa Japonica Group] gb|ABF93618.1| Thymidine kinase, putative, expressed [Oryza sativa Japonica Group] dbj|BAF10648.1| Os03g0113100 [Oryza sativa Japonica Group] dbj|BAG91085.1| unnamed protein product [Oryza sativa Japonica Group]	Phyllostachys edulis cDNA clone: bphylf056p09, full insert sequence	Thymidine kinase OS=Oryza sativa subsp. japonica GN=TK PE=2 SV=2	Thymidine kinase OS=Oryza sativa subsp. japonica GN=Os03g0113100 PE=2 SV=1
Munro_Bamboo_unigene_BMK_16683; 1; bphyem106p20; -1; bphyst005j08; -1; bphyst009j22; -1	--	--	--	--	Os10g0542400	--	hypothetical protein OsI_34514 [Oryza sativa Indica Group]	Phyllostachys edulis cDNA clone: bphyst005j08, full insert sequence	Expansin-like A2 OS=Oryza sativa subsp. japonica GN=EXLA2 PE=2 SV=1	cDNA clone:J013071J19, full insert sequence OS=Oryza sativa subsp. japonica PE=2 SV=1
Munro_Bamboo_unigene_BMK_16828; 1; bphyem110b24; 1	--	--	--	--	Os10g0508300	--	Os10g0508300 [Oryza sativa Japonica Group] dbj|BAF26935.2| Os10g0508300 [Oryza sativa Japonica Group]	Phyllostachys edulis cDNA clone: bphyem110b24, full insert sequence	Protein YABBY 3 OS=Oryza sativa subsp. japonica GN=YAB3 PE=2 SV=1	Putative uncharacterized protein OS=Oryza sativa subsp. japonica GN=OsJ_32108 PE=4 SV=1
Munro_Bamboo_unigene_BMK_16858; 1; bphylf048c19; -1	Peroxiredoxin	Posttranslational modification, protein turnover, chaperones		Biological Process: oxidation-reduction process (GO:0055114);; Molecular Function: antioxidant activity (GO:0016209);	Molecular Function: oxidoreductase activity (GO:0016491);	Molecular Function: peroxiredoxin activity (GO:0051920);	IPR000866: Alkyl hydroperoxide reductase subunit C/ Thiol specific antioxidant; IPR012336: Thioredoxin-like fold	IPR019479: Peroxiredoxin, C-terminal	Os02g0537700; K03386 peroxiredoxin (alkyl hydroperoxide reductase subunit C) [EC:1.11.1.15]	Unclassified; Genetic Information Processing; Protein folding and associated processing	Os02g0537700 [Oryza sativa Japonica Group] sp|Q6ER94.1|BAS1_ORYSJ RecName: Full=2-Cys peroxiredoxin BAS1, chloroplastic; AltName: Full=Thiol-specific antioxidant protein; Flags: Precursor dbj|BAD27915.1| putative thioredoxin peroxidase [Oryza sativa Japonica Group] dbj|BAD28826.1| putative thioredoxin peroxidase [Oryza sativa Japonica Group] emb|CAJ01693.1| 2-Cys peroxiredoxin [Oryza sativa Japonica Group] dbj|BAF08964.1| Os02g0537700 [Oryza sativa Japonica Group] dbj|BAG91160.1| unnamed protein product [Oryza sativa Japonica Group] dbj|BAG96892.1| unnamed protein product [Oryza sativa Japonica Group] gb|EEE57135.1| hypothetical protein OsJ_07037 [Oryza sativa Japonica Group]	Phyllostachys edulis cDNA clone: bphylf048c19, full insert sequence	2-Cys peroxiredoxin BAS1, chloroplastic OS=Oryza sativa subsp. japonica GN=BAS1 PE=1 SV=1	Putative uncharacterized protein OS=Oryza sativa subsp. japonica GN=OsJ_07037 PE=2 SV=1
Munro_Bamboo_unigene_BMK_16891; 1; Munro_Bamboo_unigene_BMK_35739; 1; bphyem208k22; -1; bphylf045f17; -1	--	--	--	--	Os02g0692000	--	hypothetical protein OsI_08541 [Oryza sativa Indica Group]	Phyllostachys edulis cDNA clone: bphylf045f17, full insert sequence	E3 ubiquitin-protein ligase Os04g0590900 OS=Oryza sativa subsp. japonica GN=Os04g0590900 PE=2 SV=2	Putative uncharacterized protein OS=Oryza sativa subsp. indica GN=OsI_08541 PE=4 SV=1
Munro_Bamboo_unigene_BMK_17045; 1; bphyst016b14; -1	--	--	Biological Process: translation (GO:0006412);; Cellular Component: intracellular (GO:0005622);	Cellular Component: plastid (GO:0009536);	Cellular Component: ribosome (GO:0005840);	Molecular Function: structural constituent of ribosome (GO:0003735);	IPR006924: Ribosomal protein PSRP-3/Ycf65	Os04g0461100	--	RecName: Full=30S ribosomal protein 3, chloroplastic; AltName: Full=Plastid-specific 30S ribosomal protein 3; Short=PSRP-3; Flags: Precursor emb|CAA10984.1| hypothetical protein [Hordeum vulgare subsp. vulgare]	Phyllostachys edulis cDNA clone: bphyst016b14, full insert sequence	30S ribosomal protein 3, chloroplastic OS=Hordeum vulgare GN=PSRP3 PE=2 SV=1	OSJNBa0072F16.12 protein OS=Oryza sativa subsp. japonica GN=OSJNBa0072F16.12 PE=2 SV=2
Munro_Bamboo_unigene_BMK_17155; 1; bphyem112b10; 1	--	--	Cellular Component: apoplast (GO:0048046);; Molecular Function: manganese ion binding (GO:0030145);	Molecular Function: nutrient reservoir activity (GO:0045735);	IPR001929: Germin; IPR006045: Cupin 1	IPR011051: Cupin, RmlC-type	IPR014710: RmlC-like jelly roll fold	Os03g0694000	--	hypothetical protein OsI_13114 [Oryza sativa Indica Group]	Phyllostachys edulis cDNA clone: bphyem112b10, full insert sequence	Germin-like protein 3-6 OS=Oryza sativa subsp. japonica GN=Os03g0694000 PE=2 SV=1	Putative uncharacterized protein OS=Oryza sativa subsp. indica GN=OsI_13114 PE=4 SV=1
Munro_Bamboo_unigene_BMK_17305; 1; bphylf025d12; 1	--	--	Biological Process: lipid transport (GO:0006869);; Molecular Function: lipid binding (GO:0008289);	IPR000528: Plant lipid transfer protein/Par allergen; IPR003612: Plant lipid transfer protein/seed storage/trypsin-alpha amylase inhibitor	IPR013770: Plant lipid transfer protein/hydrophobic protein, helical domain	IPR016140: Bifunctional inhibitor/plant lipid transfer protein/seed storage	Os03g0192600	--	Os03g0192600 [Oryza sativa Japonica Group] gb|ABF94417.1| Protease inhibitor/seed storage/LTP family protein, expressed [Oryza sativa Japonica Group] dbj|BAF11155.1| Os03g0192600 [Oryza sativa Japonica Group] dbj|BAG87943.1| unnamed protein product [Oryza sativa Japonica Group]	Phyllostachys edulis cDNA clone: bphylf025d12, full insert sequence	Non-specific lipid-transfer protein-like protein At5g64080 OS=Arabidopsis thaliana GN=At5g64080 PE=1 SV=1	Non-specific lipid-transfer protein OS=Oryza sativa subsp. japonica GN=Os03g0192600 PE=2 SV=1
Munro_Bamboo_unigene_BMK_17336; 1; bphyem204f20; -1	--	--	--	--	hypothetical protein LOC100272926	--	hypothetical protein LOC100272926 [Zea mays] gb|ACF78892.1| unknown [Zea mays] gb|ACF84433.1| unknown [Zea mays] gb|ACF84802.1| unknown [Zea mays] gb|ACL52692.1| unknown [Zea mays] gb|ACR35853.1| unknown [Zea mays] gb|ACR35998.1| unknown [Zea mays]	Phyllostachys edulis cDNA clone: bphyem204f20, full insert sequence	--	Putative uncharacterized protein OS=Zea mays PE=2 SV=1
Munro_Bamboo_unigene_BMK_17343; 1; bphyem210e11; 1	--	--	--	--	Os01g0719800	--	hypothetical protein OsI_03541 [Oryza sativa Indica Group]	Phyllostachys edulis cDNA clone: bphyem210e11, full insert sequence	GDSL esterase/lipase At4g10955 OS=Arabidopsis thaliana GN=At4g10955 PE=2 SV=1	Lipase class 3-like OS=Oryza sativa subsp. japonica GN=P0690B02.1 PE=4 SV=1
Munro_Bamboo_unigene_BMK_17536; 1; bphyem104a21; 1	--	--	Biological Process: oxidation-reduction process (GO:0055114);; Molecular Function: cysteamine dioxygenase activity (GO:0047800);	IPR011051: Cupin, RmlC-type; IPR012864: Cysteamine dioxygenase	IPR014710: RmlC-like jelly roll fold	Os08g0133700	--	hypothetical protein [Oryza punctata]	Phyllostachys edulis cDNA clone: bphyem104a21, full insert sequence	2-aminoethanethiol dioxygenase OS=Homo sapiens GN=ADO PE=1 SV=2	Os08g0133700 protein OS=Oryza sativa subsp. japonica GN=Os08g0133700 PE=4 SV=2
Munro_Bamboo_unigene_BMK_17578; 1; bphyem201o07; 1	--	--	Biological Process: transmembrane transport (GO:0055085);; Biological Process: transport (GO:0006810);	Cellular Component: integral to membrane (GO:0016021);	Molecular Function: transporter activity (GO:0005215);	IPR011547: Sulphate transporter	hypothetical protein	--	hypothetical protein SORBIDRAFT_01g044100 [Sorghum bicolor] gb|EER92701.1| hypothetical protein SORBIDRAFT_01g044100 [Sorghum bicolor]	Phyllostachys edulis cDNA clone: bphyem201o07, full insert sequence	Low affinity sulfate transporter 3 OS=Stylosanthes hamata GN=ST3 PE=2 SV=1	Putative uncharacterized protein Sb01g044100 OS=Sorghum bicolor GN=Sb01g044100 PE=3 SV=1
Munro_Bamboo_unigene_BMK_17634; 1; bphylf040e21; -1	Ribosomal protein L2	Translation, ribosomal structure and biogenesis		--	--	Os12g0567700; K02938 large subunit ribosomal protein L8e	Genetic Information Processing; Translation; Ribosome [PATH:ko03010] Genetic Information Processing; Translation; Ribosome [BR:ko03011]	Os12g0567700 [Oryza sativa Japonica Group] pdb|3IZ5|B Chain B, Localization Of The Large Subunit Ribosomal Proteins Into A 5.5 A Cryo-Em Map Of Triticum Aestivum Translating 80s Ribosome pdb|3IZR|B Chain B, Localization Of The Large Subunit Ribosomal Proteins Into A 5.5 A Cryo-Em Map Of Triticum Aestivum Translating 80s Ribosome gb|ABA99598.1| 60S ribosomal protein L2, putative, expressed [Oryza sativa Japonica Group] dbj|BAF30081.1| Os12g0567700 [Oryza sativa Japonica Group] gb|EAY83561.1| hypothetical protein OsI_38771 [Oryza sativa Indica Group] gb|EAZ20909.1| hypothetical protein OsJ_36548 [Oryza sativa Japonica Group]	Phyllostachys edulis cDNA clone: bphylf040e21, full insert sequence	60S ribosomal protein L8 OS=Solanum lycopersicum GN=RPL8 PE=2 SV=1	60S ribosomal protein L2, putative, expressed OS=Oryza sativa subsp. japonica GN=Os12g0567700 PE=1 SV=1
Munro_Bamboo_unigene_BMK_17641; 1; bphylf048a19; -1	NAD-dependent aldehyde dehydrogenases	Energy production and conversion		Biological Process: metabolic process (GO:0008152);; Biological Process: oxidation-reduction process (GO:0055114);	Molecular Function: oxidoreductase activity (GO:0016491);	Molecular Function: oxidoreductase activity, acting on the aldehyde or oxo group of donors, NAD or NADP as acceptor (GO:0016620);	IPR015590: Aldehyde dehydrogenase domain; IPR016160: Aldehyde dehydrogenase, conserved site	IPR016161: Aldehyde/histidinol dehydrogenase	IPR016162: Aldehyde dehydrogenase, N-terminal	IPR016163: Aldehyde dehydrogenase, C-terminal	Os06g0270900; K00128 aldehyde dehydrogenase (NAD+) [EC:1.2.1.3]	Metabolism; Carbohydrate Metabolism; Glycolysis / Gluconeogenesis [PATH:ko00010] Metabolism; Carbohydrate Metabolism; Pentose and glucuronate interconversions [PATH:ko00040] Metabolism; Carbohydrate Metabolism; Ascorbate and aldarate metabolism [PATH:ko00053] Metabolism; Carbohydrate Metabolism; Pyruvate metabolism [PATH:ko00620] Metabolism; Carbohydrate Metabolism; Propanoate metabolism [PATH:ko00640] Metabolism; Lipid Metabolism; Fatty acid metabolism [PATH:ko00071] Metabolism; Lipid Metabolism; Glycerolipid metabolism [PATH:ko00561] Metabolism; Amino Acid Metabolism; Valine, leucine and isoleucine degradation [PATH:ko00280] Metabolism; Amino Acid Metabolism; Lysine degradation [PATH:ko00310] Metabolism; Amino Acid Metabolism; Arginine and proline metabolism [PATH:ko00330] Metabolism; Amino Acid Metabolism; Histidine metabolism [PATH:ko00340] Metabolism; Amino Acid Metabolism; Tryptophan metabolism [PATH:ko00380] Metabolism; Metabolism of Other Amino Acids; beta-Alanine metabolism [PATH:ko00410] Metabolism; Metabolism of Terpenoids and Polyketides; Limonene and pinene degradation [PATH:ko00903] Metabolism; Xenobiotics Biodegradation and Metabolism; Chloroalkane and chloroalkene degradation [PATH:ko00625]	mitochondrial aldehyde dehydrogenase [Sorghum bicolor]	Phyllostachys edulis cDNA clone: bphylf048a19, full insert sequence	Aldehyde dehydrogenase family 2 member B7, mitochondrial OS=Arabidopsis thaliana GN=ALDH2B7 PE=2 SV=2	Mitochondrial aldehyde dehydrogenase OS=Sorghum bicolor GN=ALDH2b PE=2 SV=1
Munro_Bamboo_unigene_BMK_17667; 1; bphylf051n01; 1	Malic enzyme	Energy production and conversion		Biological Process: malate metabolic process (GO:0006108);; Biological Process: oxidation-reduction process (GO:0055114);	Molecular Function: NAD binding (GO:0051287);	Molecular Function: malate dehydrogenase (oxaloacetate-decarboxylating) activity (GO:0016619);	Molecular Function: malic enzyme activity (GO:0004470);	Molecular Function: metal ion binding (GO:0046872);	Molecular Function: nucleotide binding (GO:0000166);	Molecular Function: oxidoreductase activity (GO:0016491);	Molecular Function: oxidoreductase activity, acting on the CH-OH group of donors, NAD or NADP as acceptor (GO:0016616);	IPR001891: Malic oxidoreductase; IPR012301: Malic enzyme, N-terminal	IPR012302: Malic enzyme, NAD-binding	IPR015884: Malic enzyme, conserved site	IPR016040: NAD(P)-binding domain	Os07g0496200; K00028 malate dehydrogenase (decarboxylating) [EC:1.1.1.39]	Metabolism; Carbohydrate Metabolism; Pyruvate metabolism [PATH:ko00620] Metabolism; Energy Metabolism; Carbon fixation in photosynthetic organisms [PATH:ko00710]	Os07g0496200 [Oryza sativa Japonica Group] dbj|BAC83246.1| putative malate dehydrogenase [Oryza sativa Japonica Group] dbj|BAF21614.1| Os07g0496200 [Oryza sativa Japonica Group] dbj|BAG89685.1| unnamed protein product [Oryza sativa Japonica Group] gb|EEE67213.1| hypothetical protein OsJ_24330 [Oryza sativa Japonica Group]	Phyllostachys edulis cDNA clone: bphylf051n01, full insert sequence	NAD-dependent malic enzyme 62 kDa isoform, mitochondrial OS=Solanum tuberosum PE=1 SV=1	Malic enzyme OS=Oryza sativa subsp. japonica GN=OJ1457_D07.117 PE=2 SV=1
Munro_Bamboo_unigene_BMK_17669; 1; bphylf030b11; 1	--	--	Cellular Component: membrane (GO:0016020);; Molecular Function: acetylglucosaminyltransferase activity (GO:0008375);	IPR003406: Glycosyl transferase, family 14	hypothetical protein	--	hypothetical protein SORBIDRAFT_04g005050 [Sorghum bicolor] gb|EES04616.1| hypothetical protein SORBIDRAFT_04g005050 [Sorghum bicolor]	Phyllostachys edulis cDNA clone: bphylf030b11, full insert sequence	--	Putative uncharacterized protein Sb04g005050 OS=Sorghum bicolor GN=Sb04g005050 PE=4 SV=1
Munro_Bamboo_unigene_BMK_17685; 1; bphyem204h10; -1	--	--	--	IPR018108: Mitochondrial substrate/solute carrier; IPR023395: Mitochondrial carrier domain	hypothetical protein	--	hypothetical protein SORBIDRAFT_03g013340 [Sorghum bicolor] gb|EES02892.1| hypothetical protein SORBIDRAFT_03g013340 [Sorghum bicolor]	Phyllostachys edulis cDNA clone: bphyem204h10, full insert sequence	Solute carrier family 25 member 44 OS=Pongo abelii GN=SLC25A44 PE=2 SV=2	Putative uncharacterized protein Sb03g013340 OS=Sorghum bicolor GN=Sb03g013340 PE=3 SV=1
Munro_Bamboo_unigene_BMK_17735; 1; Munro_Bamboo_unigene_BMK_41995; -1; bphyem207m09; 1	--	--	--	IPR013187: F-box associated domain, type 3; IPR017451: F-box associated interaction domain	Os09g0372900	--	unknown protein [Oryza sativa Japonica Group] gb|EAZ08871.1| hypothetical protein OsI_31132 [Oryza sativa Indica Group] gb|EAZ44519.1| hypothetical protein OsJ_29138 [Oryza sativa Japonica Group] dbj|BAG90485.1| unnamed protein product [Oryza sativa Japonica Group]	Phyllostachys edulis cDNA clone: bphyem207m09, full insert sequence	F-box/kelch-repeat protein At3g06240 OS=Arabidopsis thaliana GN=At3g06240 PE=2 SV=1	Os09g0372900 protein OS=Oryza sativa subsp. japonica GN=P0599F09.14-1 PE=2 SV=1
Munro_Bamboo_unigene_BMK_17741; 1; bphyst031l08; 1	--	--	Biological Process: regulation of transcription, DNA-dependent (GO:0006355);; Molecular Function: sequence-specific DNA binding (GO:0043565);	Molecular Function: sequence-specific DNA binding transcription factor activity (GO:0003700);	IPR003657: DNA-binding WRKY; IPR018872: Zn-cluster domain	Os03g0741400	--	hypothetical protein OsJ_12515 [Oryza sativa Japonica Group]	Oryza sativa Japonica Group Os03g0741400 (Os03g0741400) mRNA, complete cds	Protein WRKY1 OS=Zea mays PE=1 SV=1	Os03g0741400 protein OS=Oryza sativa subsp. japonica GN=OJ1365_D05.15 PE=2 SV=1
Munro_Bamboo_unigene_BMK_17772; 1; bphylf051o16; 1	--	--	--	IPR007877: Protein of unknown function DUF707	csu268; LOC100284062	--	LOC100284062 [Zea mays] gb|ACG39074.1| lysine ketoglutarate reductase trans-splicing related 1 [Zea mays]	Phyllostachys edulis cDNA clone: bphylf051o16, full insert sequence	--	Lysine ketoglutarate reductase trans-splicing related 1 OS=Zea mays PE=2 SV=1
Munro_Bamboo_unigene_BMK_17923; 1; bphylf054l01; -1	--	--	--	--	hypothetical protein	--	hypothetical protein SORBIDRAFT_08g022360 [Sorghum bicolor] gb|EES16419.1| hypothetical protein SORBIDRAFT_08g022360 [Sorghum bicolor]	Phyllostachys edulis cDNA clone: bphylf054l01, full insert sequence	Fatty acid 2-hydroxylase OS=Macaca fascicularis GN=FA2H PE=2 SV=1	Putative uncharacterized protein Sb08g022360 OS=Sorghum bicolor GN=Sb08g022360 PE=4 SV=1
Munro_Bamboo_unigene_BMK_17986; 1; Munro_Bamboo_unigene_BMK_58539; 1; bphylf038d19; 1	--	--	--	--	Os02g0798200	--	Os02g0798200 [Oryza sativa Japonica Group] dbj|BAD36054.1| RING-H2 zinc finger protein-like [Oryza sativa Japonica Group] dbj|BAF10315.1| Os02g0798200 [Oryza sativa Japonica Group] dbj|BAG87941.1| unnamed protein product [Oryza sativa Japonica Group] dbj|BAG96719.1| unnamed protein product [Oryza sativa Japonica Group]	Phyllostachys edulis cDNA clone: bphylf038d19, full insert sequence	--	Os02g0798200 protein OS=Oryza sativa subsp. japonica GN=OJ1695_D07.6 PE=2 SV=1
Munro_Bamboo_unigene_BMK_18020; 1; Munro_Bamboo_unigene_BMK_45512; 1; bphylf053h02; 1	--	--	Biological Process: regulation of transcription, DNA-dependent (GO:0006355);; Molecular Function: DNA binding (GO:0003677);	Molecular Function: protein binding (GO:0005515);	IPR006447: Myb-like DNA-binding domain, SHAQKYF class; IPR009057: Homeodomain-like	IPR012287: Homeodomain-related	IPR014778: Myb, DNA-binding	hypothetical protein LOC100216818	--	hypothetical protein OsI_38947 [Oryza sativa Indica Group]	Phyllostachys edulis cDNA clone: bphylf053h02, full insert sequence	Putative Myb family transcription factor At1g14600 OS=Arabidopsis thaliana GN=At1g14600 PE=2 SV=1	Putative uncharacterized protein OS=Oryza sativa subsp. japonica GN=OsJ_35428 PE=4 SV=1
Munro_Bamboo_unigene_BMK_18538; 1; bphyst012a23; -1	--	--	--	IPR019380: Casein kinase substrate, phosphoprotein PP28	Os01g0752800	--	Os01g0752800 [Oryza sativa Japonica Group] dbj|BAD87185.1| putative 28 kDa heat- and acid-stable phosphoprotein [Oryza sativa Japonica Group] dbj|BAF06183.1| Os01g0752800 [Oryza sativa Japonica Group] gb|EEC71492.1| hypothetical protein OsI_03762 [Oryza sativa Indica Group] gb|EEE55393.1| hypothetical protein OsJ_03480 [Oryza sativa Japonica Group]	Phyllostachys edulis cDNA clone: bphyst012a23, full insert sequence	28 kDa heat- and acid-stable phosphoprotein OS=Homo sapiens GN=PDAP1 PE=1 SV=1	Os01g0752800 protein OS=Oryza sativa subsp. japonica GN=P0435B05.27 PE=4 SV=1
Munro_Bamboo_unigene_BMK_18609; 1; bphylf060k12; 1	--	--	--	--	Os01g0151600	--	Os01g0151600 [Oryza sativa Japonica Group] dbj|BAD61114.1| unknown protein [Oryza sativa Japonica Group] dbj|BAF03955.1| Os01g0151600 [Oryza sativa Japonica Group] dbj|BAG88700.1| unnamed protein product [Oryza sativa Japonica Group] gb|EEC69966.1| hypothetical protein OsI_00426 [Oryza sativa Indica Group] gb|EEE53885.1| hypothetical protein OsJ_00397 [Oryza sativa Japonica Group]	Phyllostachys edulis cDNA clone: bphylf060k12, full insert sequence	--	Os01g0151600 protein OS=Oryza sativa subsp. japonica GN=P0009G03.21 PE=2 SV=1
Munro_Bamboo_unigene_BMK_18740; 1; bphylf059a21; -1	--	--	--	--	Os03g0427000	--	hypothetical protein OsI_12135 [Oryza sativa Indica Group] gb|EEE59299.1| hypothetical protein OsJ_11346 [Oryza sativa Japonica Group]	Phyllostachys edulis cDNA clone: bphylf059a21, full insert sequence	EID1-like F-box protein 2 OS=Arabidopsis thaliana GN=EDL2 PE=2 SV=1	Circadian clock coupling factor, putative, expressed OS=Oryza sativa subsp. japonica GN=OSJNBa0083F15.24 PE=2 SV=1
Munro_Bamboo_unigene_BMK_18847; 1; Munro_Bamboo_unigene_BMK_24340; 1; bphylf049a10; -1	--	--	--	--	Os12g0405200	--	Os12g0405200 [Oryza sativa Japonica Group] gb|ABA97543.1| expressed protein [Oryza sativa Japonica Group] dbj|BAF29644.1| Os12g0405200 [Oryza sativa Japonica Group] dbj|BAG89832.1| unnamed protein product [Oryza sativa Japonica Group] gb|EEE53086.1| hypothetical protein OsJ_35845 [Oryza sativa Japonica Group]	Phyllostachys edulis cDNA clone: bphylf049a10, full insert sequence	--	Expressed protein OS=Oryza sativa subsp. japonica GN=Os12g0405200 PE=2 SV=1
Munro_Bamboo_unigene_BMK_18873; 1; bphylf053e09; -1; bphylf059o10; -1	RAB proteins geranylgeranyltransferase component A (RAB escort protein)	Posttranslational modification, protein turnover, chaperones		Biological Process: protein transport (GO:0015031);; Molecular Function: Rab GDP-dissociation inhibitor activity (GO:0005093);	IPR000806: Rab GDI protein; IPR018203: GDP dissociation inhibitor	hypothetical protein	--	hypothetical protein SORBIDRAFT_09g020540 [Sorghum bicolor] gb|EES18242.1| hypothetical protein SORBIDRAFT_09g020540 [Sorghum bicolor]	Phyllostachys edulis cDNA clone: bphylf059o10, full insert sequence	Rab GDP dissociation inhibitor alpha OS=Rattus norvegicus GN=Gdi1 PE=1 SV=1	Putative uncharacterized protein Sb09g020540 OS=Sorghum bicolor GN=Sb09g020540 PE=4 SV=1
Munro_Bamboo_unigene_BMK_19106; 1; bphylf003m14; -1; bphylf042j23; -1	--	--	--	--	Os05g0563600	--	Os05g0563600 [Oryza sativa Japonica Group] gb|AAT77396.1| unknown protein [Oryza sativa Japonica Group] dbj|BAF18242.1| Os05g0563600 [Oryza sativa Japonica Group] dbj|BAG94059.1| unnamed protein product [Oryza sativa Japonica Group]	Phyllostachys edulis cDNA clone: bphylf003m14, full insert sequence	Fasciclin-like arabinogalactan protein 13 OS=Arabidopsis thaliana GN=FLA13 PE=1 SV=1	Os05g0563600 protein OS=Oryza sativa subsp. japonica GN=OSJNBb0053D02.8 PE=2 SV=1
Munro_Bamboo_unigene_BMK_19191; 1; bphylf058p24; 1	--	--	--	IPR007573: Protein of unknown function DUF566	Os03g0206100	--	Os03g0206100 [Oryza sativa Japonica Group] dbj|BAF11231.2| Os03g0206100 [Oryza sativa Japonica Group]	Phyllostachys edulis cDNA clone: bphylf058p24, full insert sequence	--	Expressed protein OS=Oryza sativa subsp. japonica GN=LOC_Os03g10820 PE=4 SV=1
Munro_Bamboo_unigene_BMK_19193; 1; bphyst023c18; -1	--	--	Biological Process: intracellular protein transport (GO:0006886);; Cellular Component: endoplasmic reticulum (GO:0005783);	Cellular Component: integral to membrane (GO:0016021);	IPR008417: B-cell receptor-associated 31-like	Os03g0240700	--	Os03g0240700 [Oryza sativa Japonica Group] gb|ABF94889.1| expressed protein [Oryza sativa Japonica Group] dbj|BAF11424.1| Os03g0240700 [Oryza sativa Japonica Group] dbj|BAG92702.1| unnamed protein product [Oryza sativa Japonica Group] gb|EEC74842.1| hypothetical protein OsI_10697 [Oryza sativa Indica Group]	Phyllostachys edulis cDNA clone: bphyst024m16, full insert sequence	--	Expressed protein OS=Oryza sativa subsp. japonica GN=Os03g0240700 PE=2 SV=1
Munro_Bamboo_unigene_BMK_19211; 1; bphyem113k06; -1; bphyem118m06; -1; bphyem120m15; -1; bphyem202o11; -1; bphyem208a20; -1	--	--	--	--	Os07g0124900	--	Os07g0124900 [Oryza sativa Japonica Group] dbj|BAC56830.1| putative pathogenesis-related protein [Oryza sativa Japonica Group] dbj|BAC56842.1| putative pathogenesis-related protein [Oryza sativa Japonica Group] dbj|BAC84817.1| putative pathogenesis-related protein [Oryza sativa Japonica Group] dbj|BAC84248.1| putative pathogenesis-related protein [Oryza sativa Japonica Group] dbj|BAD31554.1| putative pathogenesis-related protein [Oryza sativa Japonica Group] dbj|BAD31559.1| putative pathogenesis-related protein [Oryza sativa Japonica Group] dbj|BAF20722.1| Os07g0124900 [Oryza sativa Japonica Group]	Phyllostachys edulis cDNA clone: bphyem208a20, full insert sequence	Basic form of pathogenesis-related protein 1 OS=Nicotiana tabacum PE=3 SV=1	Os07g0124900 protein OS=Oryza sativa subsp. japonica GN=P0474G09.134 PE=4 SV=1
Munro_Bamboo_unigene_BMK_19432; 1; bphyst002f23; -1; bphyst008o16; -1	Ribosomal protein HS6-type (S12/L30/L7a)	Translation, ribosomal structure and biogenesis		Biological Process: translation (GO:0006412);; Cellular Component: intracellular (GO:0005622);	Cellular Component: ribosome (GO:0005840);	Molecular Function: structural constituent of ribosome (GO:0003735);	IPR000530: Ribosomal protein S12e; IPR004038: Ribosomal protein L7Ae/L30e/S12e/Gadd45	Os07g0150200; K02951 small subunit ribosomal protein S12e	Genetic Information Processing; Translation; Ribosome  Genetic Information Processing; Translation; Ribosome [BR:ko03011]	Os07g0150200 [Oryza sativa Japonica Group] dbj|BAF20813.2| Os07g0150200 [Oryza sativa Japonica Group]	Phyllostachys edulis cDNA clone: bphyst002f23, full insert sequence	40S ribosomal protein S12 OS=Hordeum vulgare GN=RPS12 PE=2 SV=1	40S ribosomal protein S12 (Fragment) OS=Oryza sativa subsp. japonica GN=Os07g0150200 PE=3 SV=1
Munro_Bamboo_unigene_BMK_19443; 1; bphylf061l07; 1	--	--	--	--	hypothetical protein LOC100263240	--	putative AP2 domain transcription factor [Oryza sativa Japonica Group]	Phyllostachys edulis cDNA clone: bphylf061l07, full insert sequence	AP2-like ethylene-responsive transcription factor TOE3 OS=Arabidopsis thaliana GN=TOE3 PE=2 SV=1	Putative AP2 domain transcription factor OS=Oryza sativa subsp. japonica GN=OJ1001_G01.9 PE=4 SV=1
Munro_Bamboo_unigene_BMK_19476; 1; bphyem202g14; 1	--	--	--	--	Os01g0858350	--	hypothetical protein OsI_04502 [Oryza sativa Indica Group]	Phyllostachys edulis cDNA clone: bphyem202g14, full insert sequence	Cytochrome P450 94A1 OS=Vicia sativa GN=CYP94A1 PE=2 SV=2	Os01g0858350 protein OS=Oryza sativa subsp. japonica GN=P0683F02.21 PE=2 SV=1
Munro_Bamboo_unigene_BMK_19501; 1; bphyem123b18; -1	--	--	--	--	hypothetical protein; K10739 replication factor A2	Genetic Information Processing; Replication and Repair; DNA replication [PATH:ko03030] Genetic Information Processing; Replication and Repair; DNA replication proteins [BR:ko03032] Genetic Information Processing; Replication and Repair; Nucleotide excision repair [PATH:ko03420] Genetic Information Processing; Replication and Repair; Mismatch repair [PATH:ko03430] Genetic Information Processing; Replication and Repair; Homologous recombination [PATH:ko03440] Genetic Information Processing; Replication and Repair; DNA repair and recombination proteins [BR:ko03400]	hypothetical protein SORBIDRAFT_04g038190 [Sorghum bicolor] gb|EES07806.1| hypothetical protein SORBIDRAFT_04g038190 [Sorghum bicolor]	Phyllostachys edulis cDNA clone: bphyem123b18, full insert sequence	Replication protein A 32 kDa subunit OS=Rattus norvegicus GN=Rpa2 PE=2 SV=2	Putative uncharacterized protein Sb04g038190 OS=Sorghum bicolor GN=Sb04g038190 PE=4 SV=1
Munro_Bamboo_unigene_BMK_19576; 1; bphyem116n19; -1	--	--	--	IPR011598: Helix-loop-helix DNA-binding	pco139297; LOC100285681	--	hypothetical protein OsJ_23336 [Oryza sativa Japonica Group]	Phyllostachys edulis cDNA clone: bphyem116n19, full insert sequence	Transcription factor UNE12 OS=Arabidopsis thaliana GN=UNE12 PE=2 SV=2	Putative uncharacterized protein OS=Oryza sativa subsp. japonica GN=OsJ_23336 PE=4 SV=1
Munro_Bamboo_unigene_BMK_19626; 1; bphylf046d21; 1	--	--	--	--	TIDP3219; LOC100284731	--	LOC100284731 [Zea mays] gb|ACG41618.1| ATP binding protein [Zea mays] gb|ACL53909.1| unknown [Zea mays]	Phyllostachys edulis cDNA clone: bphylf046d21, full insert sequence	Probable receptor-like protein kinase At5g24010 OS=Arabidopsis thaliana GN=At5g24010 PE=1 SV=1	ATP binding protein OS=Zea mays PE=2 SV=1
Munro_Bamboo_unigene_BMK_19677; 1; bphylf035p14; -1	GTPase SAR1 and related small G proteins	General function prediction only		Biological Process: GTP catabolic process (GO:0006184);; Biological Process: intracellular protein transport (GO:0006886);	Biological Process: nucleocytoplasmic transport (GO:0006913);	Biological Process: protein transport (GO:0015031);	Biological Process: signal transduction (GO:0007165);	Biological Process: small GTPase mediated signal transduction (GO:0007264);	Cellular Component: intracellular (GO:0005622);	Cellular Component: membrane (GO:0016020);	Molecular Function: GTP binding (GO:0005525);	Molecular Function: GTPase activity (GO:0003924);	IPR001806: Small GTPase superfamily; IPR002041: Ran GTPase	IPR003578: Small GTPase superfamily, Rho type	IPR003579: Small GTPase superfamily, Rab type	IPR005225: Small GTP-binding protein domain	IPR020849: Small GTPase superfamily, Ras type	Os05g0461300; K07901 Ras-related protein Rab-8A	Environmental Information Processing; Signaling Molecules and Interaction; GTP-binding proteins [BR:ko04031] Organismal Systems; Digestive System; Pancreatic secretion [PATH:ko04972]	Os05g0461300 [Oryza sativa Japonica Group] gb|AAT39172.1| putative GTP-binding protein [Oryza sativa Japonica Group] dbj|BAF17675.1| Os05g0461300 [Oryza sativa Japonica Group] dbj|BAG99479.1| unnamed protein product [Oryza sativa Japonica Group] dbj|BAG99496.1| unnamed protein product [Oryza sativa Japonica Group] dbj|BAG99516.1| unnamed protein product [Oryza sativa Japonica Group] gb|EEC79358.1| hypothetical protein OsI_20237 [Oryza sativa Indica Group] gb|EEE63991.1| hypothetical protein OsJ_18820 [Oryza sativa Japonica Group]	Phyllostachys edulis cDNA clone: bphylf035p14, full insert sequence	Ras-related protein ARA-3 OS=Arabidopsis thaliana GN=ARA-3 PE=2 SV=1	Os05g0461300 protein OS=Oryza sativa subsp. japonica GN=OJ1281_H05.12 PE=2 SV=1
Munro_Bamboo_unigene_BMK_19701; 1; Munro_Bamboo_unigene_BMK_48912; 1; bphylf044e18; 1	--	--	--	--	--	--	--	Phyllostachys edulis cDNA clone: bphylf044e18, full insert sequence	--	--
Munro_Bamboo_unigene_BMK_19753; 1; bphylf041j05; 1	--	--	--	--	Os01g0172300	--	hypothetical protein OsI_00587 [Oryza sativa Indica Group]	Phyllostachys edulis cDNA clone: bphylf041j05, full insert sequence	--	Os01g0172300 protein OS=Oryza sativa subsp. japonica GN=P0583G08.31 PE=2 SV=1
Munro_Bamboo_unigene_BMK_19837; 1; bphyem102f24; -1; bphylf053o11; -1; bphyst004c03; -1; bphyst006e04; -1; bphyst015h19; -1	--	--	--	--	hypothetical protein LOC100193733	--	peroxidase 12 precursor [Zea mays]	Phyllostachys edulis cDNA clone: bphyem102f24, full insert sequence	Peroxidase 2 OS=Zea mays GN=PER2 PE=2 SV=1	Peroxidase 12 OS=Zea mays PE=2 SV=1
Munro_Bamboo_unigene_BMK_19977; 1; bphyst024f16; 1	--	--	Molecular Function: acid-amino acid ligase activity (GO:0016881);	IPR000608: Ubiquitin-conjugating enzyme, E2; IPR016135: Ubiquitin-conjugating enzyme/RWD-like	Os03g0681400; K10688 ubiquitin-conjugating enzyme E2 W [EC:6.3.2.19]	Genetic Information Processing; Folding, Sorting and Degradation; Ubiquitin mediated proteolysis [PATH:ko04120] Genetic Information Processing; Folding, Sorting and Degradation; Ubiquitin system [BR:ko04121]	Os03g0681400 [Oryza sativa Japonica Group] gb|AAK00965.2|AC079736_5 putative ubiquitin-conjugating enzyme E2 [Oryza sativa Japonica Group] gb|ABF98217.1| Ubiquitin-conjugating enzyme family protein, expressed [Oryza sativa Japonica Group] dbj|BAF12820.1| Os03g0681400 [Oryza sativa Japonica Group] dbj|BAG96270.1| unnamed protein product [Oryza sativa Japonica Group] gb|EEE59698.1| hypothetical protein OsJ_12122 [Oryza sativa Japonica Group]	Phyllostachys edulis cDNA clone: bphyem123l11, full insert sequence	Ubiquitin-conjugating enzyme 15 OS=Arabidopsis thaliana GN=UBC15 PE=2 SV=2	Os03g0681400 protein OS=Oryza sativa subsp. japonica GN=Os03g0681400 PE=2 SV=2
Munro_Bamboo_unigene_BMK_20071; 1; bphyem203e03; -1; bphyst005i02; -1; bphyst009k17; -1; bphyst010o01; -1; bphyst025k13; -1	Ribosomal protein L5	Translation, ribosomal structure and biogenesis		Biological Process: translation (GO:0006412);; Cellular Component: intracellular (GO:0005622);	Cellular Component: ribosome (GO:0005840);	Molecular Function: structural constituent of ribosome (GO:0003735);	IPR002132: Ribosomal protein L5; IPR020929: Ribosomal protein L5, conserved site	IPR022803: Ribosomal protein L5 domain	pco079292(382); LOC100282010	--	LOC100282010 [Zea mays] gb|ACG31313.1| 60S ribosomal protein L11-1 [Zea mays]	Phyllostachys edulis cDNA clone: bphyst005i02, full insert sequence	60S ribosomal protein L11 OS=Oryza sativa subsp. japonica GN=RPL11 PE=2 SV=1	Os02g0235600 protein OS=Oryza sativa subsp. japonica GN=Os02g0235600 PE=2 SV=1
Munro_Bamboo_unigene_BMK_20146; 1; bphyem102c18; 1	--	--	--	--	Os03g0655200; K08496 golgi SNAP receptor complex member 2	Genetic Information Processing; Folding, Sorting and Degradation; SNARE interactions in vesicular transport  Genetic Information Processing; Folding, Sorting and Degradation; SNAREs [BR:ko04131]	Os03g0655200 [Oryza sativa Japonica Group] gb|AAT78821.1| putative vesicle transport protein [Oryza sativa Japonica Group] gb|ABF97961.1| Vesicle transport v-SNARE protein, expressed [Oryza sativa Japonica Group] dbj|BAF12716.1| Os03g0655200 [Oryza sativa Japonica Group] gb|EEC75849.1| hypothetical protein OsI_12850 [Oryza sativa Indica Group] gb|EEE59617.1| hypothetical protein OsJ_11948 [Oryza sativa Japonica Group]	Phyllostachys edulis cDNA clone: bphyem102c18, full insert sequence	Membrin-11 OS=Arabidopsis thaliana GN=MEMB11 PE=1 SV=1	Os03g0655200 protein OS=Oryza sativa subsp. japonica GN=OSJNBb0023J24.7 PE=4 SV=1
Munro_Bamboo_unigene_BMK_20194; 1; bphylf034k22; -1; bphylf045m02; -1	Leucine-rich repeat (LRR) protein	Function unknown		Molecular Function: protein binding (GO:0005515);	IPR001611: Leucine-rich repeat	Os02g0234800; K11092 U2 small nuclear ribonucleoprotein A'	Genetic Information Processing; Transcription; Spliceosome [PATH:ko03040] Genetic Information Processing; Transcription; Spliceosome [BR:ko03041]	Os02g0234800 [Oryza sativa Japonica Group] dbj|BAD27667.1| putative U2 snRNP protein A' [Oryza sativa Japonica Group] dbj|BAF08297.1| Os02g0234800 [Oryza sativa Japonica Group] dbj|BAG92091.1| unnamed protein product [Oryza sativa Japonica Group] gb|EEC72795.1| hypothetical protein OsI_06481 [Oryza sativa Indica Group] gb|EEE56623.1| hypothetical protein OsJ_06008 [Oryza sativa Japonica Group]	Phyllostachys edulis cDNA clone: bphylf045m02, full insert sequence	U2 small nuclear ribonucleoprotein A' OS=Arabidopsis thaliana GN=At1g09760 PE=2 SV=2	Os02g0234800 protein OS=Oryza sativa subsp. japonica GN=OJ1145_E05.10 PE=2 SV=1
Munro_Bamboo_unigene_BMK_20202; 1; Munro_Bamboo_unigene_BMK_62369; 1; bphyem205f01; 1	RecA/RadA recombinase	Replication, recombination and repair		Biological Process: DNA metabolic process (GO:0006259);; Biological Process: DNA repair (GO:0006281);	Molecular Function: ATP binding (GO:0005524);	Molecular Function: DNA binding (GO:0003677);	Molecular Function: DNA-dependent ATPase activity (GO:0008094);	Molecular Function: single-stranded DNA binding (GO:0003697);	IPR013765: DNA recombination and repair protein RecA; IPR020584: DNA recombination/repair protein RecA, conserved site	IPR020587: DNA recombination/repair protein RecA, monomer-monomer interface	IPR020588: DNA recombination/repair protein RecA/RadB, ATP-binding domain	IPR023400: DNA recombination and repair protein RecA, C-terminal	hypothetical protein; K03553 recombination protein RecA	Genetic Information Processing; Replication and Repair; Homologous recombination [PATH:ko03440] Genetic Information Processing; Replication and Repair; DNA repair and recombination proteins [BR:ko03400]	hypothetical protein SORBIDRAFT_01g013810 [Sorghum bicolor] gb|EER93764.1| hypothetical protein SORBIDRAFT_01g013810 [Sorghum bicolor]	Phyllostachys edulis cDNA clone: bphyem205f01, full insert sequence	DNA repair protein recA homolog 1, chloroplastic OS=Arabidopsis thaliana GN=RECA PE=2 SV=1	Putative uncharacterized protein Sb01g013810 OS=Sorghum bicolor GN=Sb01g013810 PE=3 SV=1
Munro_Bamboo_unigene_BMK_20350; 1; bphylf050b13; -1	--	--	--	--	hypothetical protein	--	hypothetical protein SORBIDRAFT_03g045030 [Sorghum bicolor] gb|EES02020.1| hypothetical protein SORBIDRAFT_03g045030 [Sorghum bicolor]	Phyllostachys edulis cDNA clone: bphylf050b13, full insert sequence	Homeobox protein LUMINIDEPENDENS OS=Arabidopsis thaliana GN=LD PE=1 SV=2	Putative flowering-time protein OS=Oryza sativa subsp. japonica GN=P0492G09.3-1 PE=3 SV=1
Munro_Bamboo_unigene_BMK_20479; 1; bphyem202j09; 1	--	--	--	IPR004873: BURP	RAFTIN1a protein	--	RecName: Full=Protein RAFTIN 1A; Short=TaRAFTIN1a; AltName: Full=BURP domain-containing protein 1A; Flags: Precursor emb|CAE02612.1| RAFTIN1a anther protein [Triticum aestivum] emb|CAE02613.1| RAFTIN1a protein [Triticum aestivum]	Phyllostachys edulis cDNA clone: bphyem202j09, full insert sequence	Protein RAFTIN 1A OS=Triticum aestivum GN=RAFTIN1A PE=1 SV=1	RAFTIN1a protein OS=Zea mays PE=2 SV=1
Munro_Bamboo_unigene_BMK_20588; -1; Munro_Bamboo_unigene_BMK_23536; 1; bphyem212j10; 1	6-phosphofructokinase	Carbohydrate transport and metabolism		Biological Process: glycolysis (GO:0006096);; Cellular Component: 6-phosphofructokinase complex (GO:0005945);	Molecular Function: 6-phosphofructokinase activity (GO:0003872);	IPR000023: Phosphofructokinase domain; IPR022953: Phosphofructokinase	6-phosphofructokinase; K00850 6-phosphofructokinase [EC:2.7.1.11]	Metabolism; Carbohydrate Metabolism; Glycolysis / Gluconeogenesis [PATH:ko00010] Metabolism; Carbohydrate Metabolism; Pentose phosphate pathway [PATH:ko00030] Metabolism; Carbohydrate Metabolism; Fructose and mannose metabolism [PATH:ko00051] Metabolism; Carbohydrate Metabolism; Galactose metabolism [PATH:ko00052] Metabolism; Energy Metabolism; Methane metabolism [PATH:ko00680]	hypothetical protein OsJ_03390 [Oryza sativa Japonica Group]	Phyllostachys edulis cDNA clone: bphyem212j10, full insert sequence	6-phosphofructokinase 7 OS=Arabidopsis thaliana GN=PFK7 PE=1 SV=1	Putative pyrophosphate-dependent phosphofructo-1-kinase OS=Oryza sativa subsp. japonica GN=OSJNBb0021A09.36 PE=4 SV=1
Munro_Bamboo_unigene_BMK_20784; 1; bphylf027j16; -1	--	--	--	--	gpm917; LOC100284102	--	LOC100284102 [Zea mays] gb|ACG39213.1| zinc finger, C3HC4 type family protein [Zea mays]	Phyllostachys edulis cDNA clone: bphylf027j16, full insert sequence	E3 ubiquitin-protein ligase RING1 OS=Gossypium hirsutum GN=RING1 PE=2 SV=1	Zinc finger, C3HC4 type family protein OS=Zea mays PE=2 SV=1
Munro_Bamboo_unigene_BMK_20856; 1; bphylf025c16; 1; bphyst025o14; 1	--	--	Molecular Function: protein binding (GO:0005515);	IPR001611: Leucine-rich repeat	hypothetical protein	--	leucine-rich repeat family protein, putative, expressed [Oryza sativa Japonica Group] dbj|BAG94948.1| unnamed protein product [Oryza sativa Japonica Group] gb|EEE52591.1| hypothetical protein OsJ_34897 [Oryza sativa Japonica Group]	Phyllostachys edulis cDNA clone: bphylf025c16, full insert sequence	Probable LRR receptor-like serine/threonine-protein kinase At1g67720 OS=Arabidopsis thaliana GN=At1g67720 PE=2 SV=1	Leucine-rich repeat family protein, putative, expressed OS=Oryza sativa subsp. japonica GN=LOC_Os11g01200 PE=4 SV=1
Munro_Bamboo_unigene_BMK_20894; 1; Munro_Bamboo_unigene_BMK_54998; 1; bphyem102n16; 1	--	--	Molecular Function: nucleic acid binding (GO:0003676);	IPR002775: DNA/RNA-binding protein Alba-like	Os03g0166000	--	hypothetical protein OsI_10156 [Oryza sativa Indica Group]	Phyllostachys edulis cDNA clone: bphyem102n16, full insert sequence	Alba-like protein C9orf23 OS=Homo sapiens GN=C9orf23 PE=1 SV=1	Putative uncharacterized protein OS=Oryza sativa subsp. indica GN=OsI_10156 PE=4 SV=1
Munro_Bamboo_unigene_BMK_2090; 1; bphyem202b20; -1	Serine/threonine protein kinase	--		Biological Process: protein phosphorylation (GO:0006468);; Molecular Function: ATP binding (GO:0005524);	Molecular Function: protein kinase activity (GO:0004672);	Molecular Function: protein serine/threonine kinase activity (GO:0004674);	Molecular Function: transferase activity, transferring phosphorus-containing groups (GO:0016772);	IPR000719: Protein kinase, catalytic domain; IPR002290: Serine/threonine-protein kinase, catalytic  domain	IPR008271: Serine/threonine-protein kinase, active site	IPR011009: Protein kinase-like domain	IPR017442: Serine/threonine-protein kinase-like domain	Os03g0207300; K03097 casein kinase 2, alpha polypeptide [EC:2.7.11.1]	Metabolism; Enzyme Families; Protein kinases [BR:ko01001] Genetic Information Processing; Translation; Ribosome biogenesis in eukaryotes [PATH:ko03008] Environmental Information Processing; Signal Transduction; Wnt signaling pathway [PATH:ko04310] Cellular Processes; Cell Communication; Adherens junction [PATH:ko04520] Cellular Processes; Cell Communication; Tight junction [PATH:ko04530] Organismal Systems; Environmental Adaptation; Circadian rhythm - plant [PATH:ko04712] Human Diseases; Infectious Diseases; Measles [PATH:ko05162]	hypothetical protein OsJ_09852 [Oryza sativa Japonica Group]	Phyllostachys edulis cDNA clone: bphyem202b20, full insert sequence	Casein kinase II subunit alpha OS=Zea mays GN=ACK2 PE=1 SV=1	Casein kinase II, alpha chain, putative, expressed OS=Oryza sativa subsp. japonica GN=Os03g0207300 PE=4 SV=1
Munro_Bamboo_unigene_BMK_20921; 1; Munro_Bamboo_unigene_BMK_66585; 1; bphyem213d07; 1	Predicted Fe-S-cluster redox enzyme	General function prediction only		Molecular Function: catalytic activity (GO:0003824);; Molecular Function: iron-sulfur cluster binding (GO:0051536);	IPR007197: Radical SAM	Os03g0202300	--	hypothetical protein OsJ_09817 [Oryza sativa Japonica Group]	Phyllostachys edulis cDNA clone: bphyem213d07, full insert sequence	Ribosomal RNA large subunit methyltransferase N OS=Salinibacter ruber (strain DSM 13855 / M31) GN=rlmN PE=3 SV=1	Os03g0202300 protein OS=Oryza sativa subsp. japonica GN=Os03g0202300 PE=4 SV=1
Munro_Bamboo_unigene_BMK_21019; 1; bphyem205p10; -1	Aspartate/tyrosine/aromatic aminotransferase	Amino acid transport and metabolism		--	--	Os01g0760600; K00813 aspartate aminotransferase [EC:2.6.1.1]	Metabolism; Energy Metabolism; Carbon fixation in photosynthetic organisms [PATH:ko00710] Metabolism; Amino Acid Metabolism; Alanine, aspartate and glutamate metabolism [PATH:ko00250] Metabolism; Amino Acid Metabolism; Cysteine and methionine metabolism [PATH:ko00270] Metabolism; Amino Acid Metabolism; Arginine and proline metabolism [PATH:ko00330] Metabolism; Amino Acid Metabolism; Tyrosine metabolism [PATH:ko00350] Metabolism; Amino Acid Metabolism; Phenylalanine metabolism [PATH:ko00360] Metabolism; Amino Acid Metabolism; Phenylalanine, tyrosine and tryptophan biosynthesis [PATH:ko00400] Metabolism; Amino Acid Metabolism; Amino acid related enzymes [BR:ko01007] Metabolism; Biosynthesis of Other Secondary Metabolites; Isoquinoline alkaloid biosynthesis [PATH:ko00950] Metabolism; Biosynthesis of Other Secondary Metabolites; Tropane, piperidine and pyridine alkaloid biosynthesis [PATH:ko00960] Metabolism; Biosynthesis of Other Secondary Metabolites; Novobiocin biosynthesis [PATH:ko00401]	Os01g0760600 [Oryza sativa Japonica Group] dbj|BAD87343.1| putative aspartate aminotransferase [Oryza sativa Japonica Group] dbj|BAF06231.1| Os01g0760600 [Oryza sativa Japonica Group] dbj|BAG96155.1| unnamed protein product [Oryza sativa Japonica Group]	Phyllostachys edulis cDNA clone: bphyem205p10, full insert sequence	Aspartate aminotransferase, cytoplasmic OS=Oryza sativa subsp. japonica GN=Os01g0760600 PE=2 SV=1	Aspartate aminotransferase OS=Oryza sativa subsp. japonica GN=Os01g0760600 PE=2 SV=1
Munro_Bamboo_unigene_BMK_21081; 1; bphylf043l03; -1	Ribosomal protein S10E	Translation, ribosomal structure and biogenesis		--	IPR005326: Plectin/S10, N-terminal	Os01g0962600; K02947 small subunit ribosomal protein S10e	Genetic Information Processing; Translation; Ribosome [PATH:ko03010] Genetic Information Processing; Translation; Ribosome [BR:ko03011]	Os01g0962600 [Oryza sativa Japonica Group] dbj|BAB63622.1| putative 40S ribosomal protein S10 [Oryza sativa Japonica Group] dbj|BAF07394.1| Os01g0962600 [Oryza sativa Japonica Group] gb|EAY77331.1| hypothetical protein OsI_05313 [Oryza sativa Indica Group] gb|EAZ14924.1| hypothetical protein OsJ_04856 [Oryza sativa Japonica Group]	Phyllostachys edulis cDNA clone: bphylf043l03, full insert sequence	40S ribosomal protein S10 OS=Oryza sativa subsp. japonica GN=RPS10 PE=2 SV=2	Os01g0962600 protein OS=Oryza sativa subsp. japonica GN=P0483G10.27 PE=4 SV=1
Munro_Bamboo_unigene_BMK_21176; 1; bphylf041i16; -1	--	--	--	--	Os07g0627700	--	Os07g0627700 [Oryza sativa Japonica Group] dbj|BAF22260.1| Os07g0627700 [Oryza sativa Japonica Group] dbj|BAG92195.1| unnamed protein product [Oryza sativa Japonica Group] gb|EEC82496.1| hypothetical protein OsI_26956 [Oryza sativa Indica Group] gb|EEE67635.1| hypothetical protein OsJ_25211 [Oryza sativa Japonica Group]	Phyllostachys edulis cDNA clone: bphylf041i16, full insert sequence	--	Os07g0627700 protein OS=Oryza sativa subsp. japonica GN=Os07g0627700 PE=2 SV=1
Munro_Bamboo_unigene_BMK_212; 1; bphyst012d10; -1	--	--	--	--	hypothetical protein	--	unknown protein [Oryza sativa Japonica Group] gb|EAZ02143.1| hypothetical protein OsI_24233 [Oryza sativa Indica Group] gb|EAZ38070.1| hypothetical protein OsJ_22416 [Oryza sativa Japonica Group]	Phyllostachys edulis cDNA clone: bphyst012d10, full insert sequence	Coiled-coil domain-containing protein 72 OS=Tetraodon nigroviridis GN=ccdc72 PE=3 SV=1	Putative uncharacterized protein OS=Oryza sativa subsp. japonica GN=P0623A10.17-1 PE=4 SV=1
Munro_Bamboo_unigene_BMK_21226; -1; Munro_Bamboo_unigene_BMK_61617; 1; bphyem206l07; 1	--	--	--	IPR003582: Metridin-like ShK toxin	hypothetical protein; K00472 prolyl 4-hydroxylase [EC:1.14.11.2]	Metabolism; Amino Acid Metabolism; Arginine and proline metabolism [PATH:ko00330]	hypothetical protein SORBIDRAFT_01g004670 [Sorghum bicolor] gb|EER90709.1| hypothetical protein SORBIDRAFT_01g004670 [Sorghum bicolor]	Phyllostachys edulis cDNA clone: bphyem206l07, full insert sequence	--	Putative uncharacterized protein Sb01g004670 OS=Sorghum bicolor GN=Sb01g004670 PE=4 SV=1
Munro_Bamboo_unigene_BMK_21387; 1; bphylf002a17; 1	--	--	--	--	hypothetical protein	--	hypothetical protein SORBIDRAFT_07g026170 [Sorghum bicolor] gb|EES14191.1| hypothetical protein SORBIDRAFT_07g026170 [Sorghum bicolor]	Phyllostachys edulis cDNA clone: bphylf002a17, full insert sequence	Nuclear transport factor 2 OS=Oryza sativa subsp. japonica GN=NTF2 PE=2 SV=1	Os08g0532300 protein OS=Oryza sativa subsp. japonica GN=Os08g0532300 PE=2 SV=1
Munro_Bamboo_unigene_BMK_21447; 1; bphylf056o19; -1	--	--	--	--	hypothetical protein	--	hypothetical protein SORBIDRAFT_03g011180 [Sorghum bicolor] gb|EES00580.1| hypothetical protein SORBIDRAFT_03g011180 [Sorghum bicolor]	Phyllostachys edulis cDNA clone: bphylf056o19, full insert sequence	--	Os01g0277700 protein OS=Oryza sativa subsp. japonica GN=P0025D05.3 PE=2 SV=1
Munro_Bamboo_unigene_BMK_21495; 1; bphyst005e23; -1	Leucine-rich repeat (LRR) protein	Function unknown		Molecular Function: protein binding (GO:0005515);	IPR001611: Leucine-rich repeat; IPR003591: Leucine-rich repeat, typical subtype	hypothetical protein	--	hypothetical protein SORBIDRAFT_01g043120 [Sorghum bicolor] gb|EER95291.1| hypothetical protein SORBIDRAFT_01g043120 [Sorghum bicolor]	Sorghum bicolor hypothetical protein, mRNA	LRR repeats and ubiquitin-like domain-containing protein At2g30105 OS=Arabidopsis thaliana GN=At2g30105 PE=1 SV=1	Putative uncharacterized protein Sb01g043120 OS=Sorghum bicolor GN=Sb01g043120 PE=4 SV=1
Munro_Bamboo_unigene_BMK_21857; 1; bphyem204i07; -1	--	--	--	--	hypothetical protein	--	hypothetical protein SORBIDRAFT_02g044050 [Sorghum bicolor] gb|EER99970.1| hypothetical protein SORBIDRAFT_02g044050 [Sorghum bicolor]	Phyllostachys edulis cDNA clone: bphyem204i07, full insert sequence	Probable sugar phosphate/phosphate translocator At3g11320 OS=Arabidopsis thaliana GN=At3g11320 PE=2 SV=1	Putative uncharacterized protein Sb02g044050 OS=Sorghum bicolor GN=Sb02g044050 PE=4 SV=1
Munro_Bamboo_unigene_BMK_21879; 1; Munro_Bamboo_unigene_BMK_27979; -1; Munro_Bamboo_unigene_BMK_53941; 1; bphylf056n01; 1	--	--	Molecular Function: nucleotide binding (GO:0000166);	IPR016040: NAD(P)-binding domain; IPR021940: Uncharacterised domain Wax2, C-terminal	Os02g0178800	--	hypothetical protein OsJ_05611 [Oryza sativa Japonica Group]	Phyllostachys edulis cDNA clone: bphylf056n01, full insert sequence	Protein WAX2 OS=Arabidopsis thaliana GN=WAX2 PE=1 SV=1	Os02g0178800 protein OS=Oryza sativa subsp. japonica GN=P0544B02.10 PE=2 SV=1
Munro_Bamboo_unigene_BMK_21884; 1; bphylf036g04; 1	3-hydroxymyristoyl/3-hydroxydecanoyl-(acyl carrier protein) dehydratases	Lipid transport and metabolism		--	IPR013114: Beta-hydroxyacyl-(acyl-carrier-protein) dehydratase, FabA/FabZ	hypothetical protein; K02372 3R-hydroxymyristoyl ACP dehydrase [EC:4.2.1.-]	Metabolism; Lipid Metabolism; Fatty acid biosynthesis [PATH:ko00061] Metabolism; Lipid Metabolism; Lipid biosynthesis proteins [BR:ko01004]	hypothetical protein OsI_28286 [Oryza sativa Indica Group]	Phyllostachys edulis cDNA clone: bphylf036g04, full insert sequence	(3R)-hydroxymyristoyl-[acyl-carrier-protein] dehydratase OS=Microcystis aeruginosa (strain NIES-843) GN=fabZ PE=3 SV=1	Putative uncharacterized protein OS=Oryza sativa subsp. indica GN=OsI_28286 PE=3 SV=1
Munro_Bamboo_unigene_BMK_22086; 1; bpst40201g03; 1	--	--	Cellular Component: membrane (GO:0016020);	IPR005016: TMS membrane protein/tumour differentially expressed protein	Os02g0792900	--	Os02g0792900 [Oryza sativa Japonica Group] dbj|BAD19186.1| putative tumor differentially expressed protein 1 [Oryza sativa Japonica Group] dbj|BAD19654.1| putative tumor differentially expressed protein 1 [Oryza sativa Japonica Group] dbj|BAF10278.1| Os02g0792900 [Oryza sativa Japonica Group] gb|EAY87831.1| hypothetical protein OsI_09251 [Oryza sativa Indica Group] dbj|BAG96913.1| unnamed protein product [Oryza sativa Japonica Group] dbj|BAG97616.1| unnamed protein product [Oryza sativa Japonica Group] dbj|BAG99574.1| unnamed protein product [Oryza sativa Japonica Group]	Phyllostachys edulis cDNA clone: bpst40201g03, full insert sequence	Probable serine incorporator OS=Nematostella vectensis GN=serinc PE=3 SV=1	Os02g0792900 protein OS=Oryza sativa subsp. japonica GN=P0700F06.14 PE=2 SV=1
Munro_Bamboo_unigene_BMK_22143; 1; bphyem202d09; -1	--	--	--	IPR004331: SPX, N-terminal	Os07g0673200	--	RecName: Full=Probable E3 ubiquitin-protein ligase BAH1-like 1 gb|EEC82667.1| hypothetical protein OsI_27296 [Oryza sativa Indica Group]	Phyllostachys edulis cDNA clone: bphyem202d09, full insert sequence	Probable E3 ubiquitin-protein ligase BAH1-like 1 OS=Oryza sativa subsp. indica GN=OsI_27296 PE=3 SV=1	Putative uncharacterized protein Sb02g042630 OS=Sorghum bicolor GN=Sb02g042630 PE=4 SV=1
Munro_Bamboo_unigene_BMK_22177; 1; bphyem125m02; 1; bphyem127b14; 1	--	--	--	--	hypothetical protein	--	hypothetical protein SORBIDRAFT_02g022820 [Sorghum bicolor] gb|EER96625.1| hypothetical protein SORBIDRAFT_02g022820 [Sorghum bicolor]	Phyllostachys edulis cDNA clone: bphyem127b14, full insert sequence	--	Putative uncharacterized protein Sb02g022820 OS=Sorghum bicolor GN=Sb02g022820 PE=4 SV=1
Munro_Bamboo_unigene_BMK_22199; 1; bphylf030f15; -1; bphylf047g13; -1	Predicted molecular chaperone distantly related to HSP70-fold metalloproteases	Posttranslational modification, protein turnover, chaperones		--	--	chlorophyll a-b binding protein 6A; K08907 light-harvesting complex I chlorophyll a/b binding protein 1	Metabolism; Energy Metabolism; Photosynthesis - antenna proteins [PATH:ko00196] Metabolism; Energy Metabolism; Photosynthesis proteins [BR:ko00194]	chloroplast chlorophyll a/b binding protein precursor [Phyllostachys edulis]	Phyllostachys edulis cDNA clone: bphylf047g13, full insert sequence	Chlorophyll a-b binding protein 1B-21, chloroplastic OS=Hordeum vulgare GN=LHC Ib-21 PE=1 SV=1	Chloroplast chlorophyll a/b binding protein OS=Phyllostachys edulis GN=Lhca1 PE=2 SV=1
Munro_Bamboo_unigene_BMK_223; 1; Munro_Bamboo_unigene_BMK_47319; 1; bphyst010c06; -1	--	--	--	--	Os06g0691200	--	Os06g0691200 [Oryza sativa Japonica Group] dbj|BAD45633.1| putative thaumatin-protein [Oryza sativa Japonica Group] dbj|BAD54510.1| putative thaumatin-protein [Oryza sativa Japonica Group] dbj|BAF20335.1| Os06g0691200 [Oryza sativa Japonica Group] dbj|BAG98320.1| unnamed protein product [Oryza sativa Japonica Group]	Phyllostachys edulis cDNA clone: bphyst010c06, full insert sequence	Thaumatin-like protein OS=Arabidopsis thaliana GN=At1g18250 PE=2 SV=2	Os06g0691200 protein OS=Oryza sativa subsp. japonica GN=P0661G04.45 PE=2 SV=1
Munro_Bamboo_unigene_BMK_22333; 1; Munro_Bamboo_unigene_BMK_65245; 1; bphylf042l24; 1; bphylf044e07; 1	--	--	--	--	hypothetical protein	--	hypothetical protein SORBIDRAFT_01g006730 [Sorghum bicolor] gb|EER90815.1| hypothetical protein SORBIDRAFT_01g006730 [Sorghum bicolor]	Phyllostachys edulis cDNA clone: bphylf044e07, full insert sequence	Chitin-binding lectin 1 OS=Solanum tuberosum PE=1 SV=2	Putative uncharacterized protein Sb01g006730 OS=Sorghum bicolor GN=Sb01g006730 PE=4 SV=1
Munro_Bamboo_unigene_BMK_22342; -1; Munro_Bamboo_unigene_BMK_22525; 1; bphyem202b07; 1	--	--	--	--	Os03g0338000; K00827 alanine-glyoxylate transaminase / (R)-3-amino-2-methylpropionate-pyruvate transaminase [EC:2.6.1.44 2.6.1.40]	Metabolism; Amino Acid Metabolism; Alanine, aspartate and glutamate metabolism [PATH:ko00250] Metabolism; Amino Acid Metabolism; Glycine, serine and threonine metabolism [PATH:ko00260] Metabolism; Amino Acid Metabolism; Amino acid related enzymes [BR:ko01007]	Os03g0338000 [Oryza sativa Japonica Group] gb|ABF95834.1| Alanine-glyoxylate aminotransferase 2, mitochondrial precursor, putative, expressed [Oryza sativa Japonica Group] dbj|BAF11967.1| Os03g0338000 [Oryza sativa Japonica Group]	Phyllostachys edulis cDNA clone: bphyem202b07, full insert sequence	Alanine--glyoxylate aminotransferase 2 homolog 3, mitochondrial OS=Arabidopsis thaliana GN=At3g08860 PE=2 SV=1	Alanine-glyoxylate aminotransferase 2, mitochondrial, putative, expressed OS=Oryza sativa subsp. japonica GN=Os03g0338000 PE=3 SV=1
Munro_Bamboo_unigene_BMK_22404; 1; bphylf038p20; 1	--	--	Biological Process: lipid metabolic process (GO:0006629);; Molecular Function: O-acyltransferase activity (GO:0008374);	IPR003386: Lecithin:cholesterol/phospholipid:diacylglycerol acyltransferase	Os12g0110100	--	Os11g0109966 [Oryza sativa Japonica Group] dbj|BAH95037.1| Os11g0109966 [Oryza sativa Japonica Group]	Phyllostachys edulis cDNA clone: bphylf038p20, full insert sequence	--	Putative uncharacterized protein OS=Oryza sativa subsp. japonica GN=LOC_Os11g01880 PE=4 SV=1
Munro_Bamboo_unigene_BMK_22415; 1; bphyem125j10; 1	--	--	--	--	Os07g0604500	--	Os07g0604500 [Oryza sativa Japonica Group] dbj|BAC83874.1| translocase inner membrane-like protein [Oryza sativa Japonica Group] dbj|BAF22135.1| Os07g0604500 [Oryza sativa Japonica Group] dbj|BAG89069.1| unnamed protein product [Oryza sativa Japonica Group] dbj|BAG91244.1| unnamed protein product [Oryza sativa Japonica Group]	Phyllostachys edulis cDNA clone: bpst40101g21, full insert sequence	Mitochondrial import inner membrane translocase subunit Tim17 OS=Arabidopsis thaliana GN=TIM17 PE=2 SV=2	Os07g0604500 protein OS=Oryza sativa subsp. japonica GN=OSJNBb0040H10.15 PE=2 SV=1
Munro_Bamboo_unigene_BMK_22612; 1; bphyst039m16; -1	--	--	--	--	hypothetical protein	--	hypothetical protein SORBIDRAFT_01g039710 [Sorghum bicolor] gb|EER92485.1| hypothetical protein SORBIDRAFT_01g039710 [Sorghum bicolor]	Phyllostachys edulis cDNA clone: bphyst039m16, full insert sequence	--	Putative uncharacterized protein Sb01g039710 OS=Sorghum bicolor GN=Sb01g039710 PE=4 SV=1
Munro_Bamboo_unigene_BMK_22750; 1; bbasst002j02; -1	Ribosomal protein S19E (S16A)	Translation, ribosomal structure and biogenesis		Biological Process: translation (GO:0006412);; Cellular Component: intracellular (GO:0005622);	Cellular Component: ribosome (GO:0005840);	Molecular Function: structural constituent of ribosome (GO:0003735);	IPR001266: Ribosomal protein S19e; IPR018277: Ribosomal protein S19e, conserved site	hypothetical protein; K02966 small subunit ribosomal protein S19e	Genetic Information Processing; Translation; Ribosome  Genetic Information Processing; Translation; Ribosome [BR:ko03011]	hypothetical protein SORBIDRAFT_07g025000 [Sorghum bicolor] gb|EES14121.1| hypothetical protein SORBIDRAFT_07g025000 [Sorghum bicolor]	Phyllostachys edulis cDNA clone: bbasst002j02, full insert sequence	40S ribosomal protein S19 OS=Oryza sativa subsp. japonica GN=RPS19A PE=3 SV=1	Putative uncharacterized protein Sb07g025000 OS=Sorghum bicolor GN=Sb07g025000 PE=4 SV=1
Munro_Bamboo_unigene_BMK_22793; 1; bphyem202o03; -1; bphyem204k24; -1	--	--	--	--	Os08g0567000	--	Os08g0567000 [Oryza sativa Japonica Group] dbj|BAF24459.1| Os08g0567000 [Oryza sativa Japonica Group] dbj|BAG89407.1| unnamed protein product [Oryza sativa Japonica Group]	Phyllostachys edulis cDNA clone: bphyem204k24, full insert sequence	--	Putative uncharacterized protein OS=Oryza sativa subsp. japonica GN=OSJNBa0044E16.36 PE=4 SV=1
Munro_Bamboo_unigene_BMK_22831; -1; Munro_Bamboo_unigene_BMK_23963; 1; bphyem124o12; -1; bphylf060i12; -1; bphylf061k03; -1	--	--	--	--	Os03g0132200	--	Os03g0132200 [Oryza sativa Japonica Group] sp|Q10S70.1|EXLA1_ORYSJ RecName: Full=Expansin-like A1; AltName: Full=OsEXLA1; AltName: Full=OsEXPL1; AltName: Full=OsaEXPb2.1; Flags: Precursor gb|AAK84681.1| expansin-like protein A [Oryza sativa] gb|ABF93824.1| Rare lipoprotein A like double-psi beta-barrel containing protein, expressed [Oryza sativa Japonica Group] dbj|BAF10782.1| Os03g0132200 [Oryza sativa Japonica Group] dbj|BAG87937.1| unnamed protein product [Oryza sativa Japonica Group] dbj|BAG90257.1| unnamed protein product [Oryza sativa Japonica Group] dbj|BAG94331.1| unnamed protein product [Oryza sativa Japonica Group] gb|EEC74453.1| hypothetical protein OsI_09865 [Oryza sativa Indica Group] gb|EEE58281.1| hypothetical protein OsJ_09301 [Oryza sativa Japonica Group]	Phyllostachys edulis cDNA clone: bphylf060i12, full insert sequence	Expansin-like A1 OS=Oryza sativa subsp. japonica GN=EXLA1 PE=2 SV=1	Os03g0132200 protein OS=Oryza sativa subsp. japonica GN=Os03g0132200 PE=2 SV=1
Munro_Bamboo_unigene_BMK_22977; 1; bphyst011d13; -1	--	--	--	--	--	--	--	Phyllostachys edulis cDNA clone: bphyst011d13, full insert sequence	--	--
Munro_Bamboo_unigene_BMK_23082; 1; bphylf033k09; -1; bphyst003b13; -1	Glutamine synthetase	Amino acid transport and metabolism		--	--	Os03g0223400; K01915 glutamine synthetase [EC:6.3.1.2]	Metabolism; Energy Metabolism; Nitrogen metabolism [PATH:ko00910] Metabolism; Amino Acid Metabolism; Alanine, aspartate and glutamate metabolism [PATH:ko00250] Metabolism; Amino Acid Metabolism; Arginine and proline metabolism [PATH:ko00330] Environmental Information Processing; Signal Transduction; Two-component system [PATH:ko02020]	glutamine synthetase [Saccharum officinarum]	Phyllostachys edulis cDNA clone: bphylf033k09, full insert sequence	Glutamine synthetase cytosolic isozyme 1-2 OS=Oryza sativa subsp. japonica GN=GLN1-2 PE=1 SV=1	Glutamine synthetase OS=Saccharum officinarum GN=GS1.b PE=2 SV=1
Munro_Bamboo_unigene_BMK_23125; 1; bphyem115f05; -1; bphylf045i16; -1; bphylf046p09; -1	--	--	--	--	hypothetical protein	--	hypothetical protein SORBIDRAFT_04g027370 [Sorghum bicolor] gb|EES05496.1| hypothetical protein SORBIDRAFT_04g027370 [Sorghum bicolor]	Phyllostachys edulis cDNA clone: bphylf045i16, full insert sequence	--	Putative phi-1 OS=Oryza sativa subsp. japonica GN=P0436F11.32 PE=4 SV=1
Munro_Bamboo_unigene_BMK_23126; 1; bphyem102n10; 1	Malic enzyme	Energy production and conversion		Biological Process: oxidation-reduction process (GO:0055114);; Molecular Function: NAD binding (GO:0051287);	Molecular Function: nucleotide binding (GO:0000166);	Molecular Function: oxidoreductase activity, acting on the CH-OH group of donors, NAD or NADP as acceptor (GO:0016616);	IPR012302: Malic enzyme, NAD-binding; IPR016040: NAD(P)-binding domain	Os01g0188400; K00029 malate dehydrogenase (oxaloacetate-decarboxylating)(NADP+) [EC:1.1.1.40]	Metabolism; Carbohydrate Metabolism; Pyruvate metabolism  Metabolism; Energy Metabolism; Carbon fixation in photosynthetic organisms	NADP-dependent malic enzyme [Merxmuellera macowanii]	Phyllostachys edulis cDNA clone: bphyem102n10, full insert sequence	NADP-dependent malic enzyme, chloroplastic OS=Oryza sativa subsp. japonica GN=ME6 PE=2 SV=2	Malic enzyme (Fragment) OS=Merxmuellera macowanii GN=nadpme-IV PE=3 SV=1
Munro_Bamboo_unigene_BMK_23230; 1; bphylf048f08; -1	--	--	Molecular Function: nucleic acid binding (GO:0003676);; Molecular Function: zinc ion binding (GO:0008270);	IPR000571: Zinc finger, CCCH-type	Os11g0472000	--	hypothetical protein OsJ_33853 [Oryza sativa Japonica Group]	Phyllostachys edulis cDNA clone: bphylf048f08, full insert sequence	Zinc finger CCCH domain-containing protein 63 OS=Oryza sativa subsp. japonica GN=Os11g0472000 PE=2 SV=2	Putative uncharacterized protein OS=Oryza sativa subsp. japonica GN=OsJ_33853 PE=4 SV=1
Munro_Bamboo_unigene_BMK_23262; 1; bphylf028j01; -1	Uncharacterized conserved protein	Function unknown		--	IPR007214: YbaK/aminoacyl-tRNA synthetase-associated domain	hypothetical protein	--	hypothetical protein SORBIDRAFT_04g034280 [Sorghum bicolor] gb|EES07587.1| hypothetical protein SORBIDRAFT_04g034280 [Sorghum bicolor]	Phyllostachys edulis cDNA clone: bphylf028j01, full insert sequence	Prolyl-tRNA synthetase associated domain-containing protein 1 OS=Xenopus laevis GN=prorsd1p PE=2 SV=1	Putative uncharacterized protein Sb04g034280 OS=Sorghum bicolor GN=Sb04g034280 PE=4 SV=1
Munro_Bamboo_unigene_BMK_23267; 1; Munro_Bamboo_unigene_BMK_34470; 1; bphyem208a05; -1	ATPases of the AAA+ class	Posttranslational modification, protein turnover, chaperones		Molecular Function: ATP binding (GO:0005524);	IPR003959: ATPase, AAA-type, core	hypothetical protein LOC100193425	--	hypothetical protein SORBIDRAFT_06g020120 [Sorghum bicolor] gb|EES10996.1| hypothetical protein SORBIDRAFT_06g020120 [Sorghum bicolor]	Phyllostachys edulis cDNA clone: bphyem208a05, full insert sequence	Thyroid receptor-interacting protein 13 OS=Rattus norvegicus GN=Trip13 PE=2 SV=1	Putative uncharacterized protein Sb06g020120 OS=Sorghum bicolor GN=Sb06g020120 PE=3 SV=1
Munro_Bamboo_unigene_BMK_23285; 1; bphylf045g04; -1	Isopenicillin N synthase and related dioxygenases	General function prediction only		--	--	Os09g0245500; K06892	Unclassified; Poorly Characterized; General function prediction only	Os09g0245500 [Oryza sativa Japonica Group] dbj|BAD23370.1| putative 2-oxoacid-dependent oxidase [Oryza sativa Japonica Group] dbj|BAD23538.1| putative 2-oxoacid-dependent oxidase [Oryza sativa Japonica Group] dbj|BAF24572.1| Os09g0245500 [Oryza sativa Japonica Group] gb|EEC84147.1| hypothetical protein OsI_30514 [Oryza sativa Indica Group] gb|EEE69249.1| hypothetical protein OsJ_28501 [Oryza sativa Japonica Group]	Phyllostachys edulis cDNA clone: bphylf045g04, full insert sequence	--	Os09g0245500 protein OS=Oryza sativa subsp. japonica GN=OSJNBa0069P02.20 PE=3 SV=1
Munro_Bamboo_unigene_BMK_23367; 1; Munro_Bamboo_unigene_BMK_47219; 1; bphylf050n21; -1	Ketol-acid reductoisomerase	--		Biological Process: branched chain family amino acid biosynthetic process (GO:0009082);; Biological Process: cellular amino acid biosynthetic process (GO:0008652);	Biological Process: oxidation-reduction process (GO:0055114);	Molecular Function: coenzyme binding (GO:0050662);	Molecular Function: ketol-acid reductoisomerase activity (GO:0004455);	Molecular Function: nucleotide binding (GO:0000166);	Molecular Function: oxidoreductase activity (GO:0016491);	Molecular Function: oxidoreductase activity, acting on the CH-OH group of donors, NAD or NADP as acceptor (GO:0016616);	IPR000506: Acetohydroxy acid isomeroreductase C-terminal; IPR008927: 6-phosphogluconate dehydrogenase, C-terminal-like	IPR013023: Acetohydroxy acid isomeroreductase	IPR013116: Acetohydroxy acid isomeroreductase, catalytic	IPR013328: Dehydrogenase, multihelical	IPR016040: NAD(P)-binding domain	IPR016206: Ketol-acid reductoisomerase	Os05g0573700; K00053 ketol-acid reductoisomerase [EC:1.1.1.86]	Metabolism; Amino Acid Metabolism; Valine, leucine and isoleucine biosynthesis [PATH:ko00290] Metabolism; Metabolism of Cofactors and Vitamins; Pantothenate and CoA biosynthesis [PATH:ko00770]	hypothetical protein OsI_21076 [Oryza sativa Indica Group]	Phyllostachys edulis cDNA clone: bphylf050n21, full insert sequence	Ketol-acid reductoisomerase, chloroplastic OS=Oryza sativa subsp. japonica GN=Os05g0573700 PE=1 SV=1	Putative uncharacterized protein OS=Oryza sativa subsp. indica GN=OsI_21076 PE=4 SV=1
Munro_Bamboo_unigene_BMK_23385; 1; bphylf046e02; -1	Histone deacetylase complex, SIN3 component	Chromatin structure and dynamics		Biological Process: regulation of transcription, DNA-dependent (GO:0006355);; Cellular Component: nucleus (GO:0005634);	IPR003822: Paired amphipathic helix	Os05g0100500	--	hypothetical protein OsI_18074 [Oryza sativa Indica Group]	Phyllostachys edulis cDNA clone: bphylf046e02, full insert sequence	Paired amphipathic helix protein Sin3-like 4 OS=Arabidopsis thaliana GN=SNL4 PE=3 SV=2	Os05g0100500 protein (Fragment) OS=Oryza sativa subsp. japonica GN=Os05g0100500 PE=4 SV=1
Munro_Bamboo_unigene_BMK_23414; 1; bphyem002b24; 1	--	--	--	--	csu275a(mtl); LOC100282059	--	metallothioneine type2 [Hordeum vulgare subsp. vulgare]	Phyllostachys edulis cDNA clone: bphyem002b24, full insert sequence	Metallothionein-like protein 2C OS=Oryza sativa subsp. japonica GN=MT2C PE=2 SV=1	Metallothioneine type2 OS=Hordeum vulgare var. distichum GN=mt2a PE=4 SV=1
Munro_Bamboo_unigene_BMK_23449; 1; bphylf056e08; 1	Diadenosine tetraphosphatase and related serine/threonine protein phosphatases	Signal transduction mechanisms		Molecular Function: hydrolase activity (GO:0016787);	IPR004843: Metallophosphoesterase domain; IPR006186: Serine/threonine-specific protein phosphatase/bis(5-nucleosyl)-tetraphosphatase	hypothetical protein	--	hypothetical protein SORBIDRAFT_09g004260 [Sorghum bicolor] gb|EES17746.1| hypothetical protein SORBIDRAFT_09g004260 [Sorghum bicolor]	Phyllostachys edulis cDNA clone: bphylf056e08, full insert sequence	Serine/threonine-protein phosphatase PP1 OS=Phaseolus vulgaris PE=2 SV=1	Serine/threonine-protein phosphatase OS=Sorghum bicolor GN=Sb09g004260 PE=3 SV=1
Munro_Bamboo_unigene_BMK_23450; 1; Munro_Bamboo_unigene_BMK_35784; -1; bphylf028g05; 1	Serine/threonine protein kinase	--		--	--	pk4, ZmPK4; protein kinase4	--	unknown [Zea mays]	Phyllostachys edulis cDNA clone: bphylf028g05, full insert sequence	CBL-interacting protein kinase 19 OS=Oryza sativa subsp. japonica GN=CIPK19 PE=1 SV=1	Protein kinase PK4 OS=Zea mays PE=2 SV=1
Munro_Bamboo_unigene_BMK_23592; 1; bphylf053f03; -1	--	--	--	--	hypothetical protein	--	hypothetical protein SORBIDRAFT_01g041190 [Sorghum bicolor] gb|EER92561.1| hypothetical protein SORBIDRAFT_01g041190 [Sorghum bicolor]	Phyllostachys edulis cDNA clone: bphylf053f03, full insert sequence	3-ketoacyl-CoA synthase 1 OS=Arabidopsis thaliana GN=KCS1 PE=1 SV=1	3-ketoacyl-CoA synthase OS=Sorghum bicolor GN=Sb01g041190 PE=3 SV=1
Munro_Bamboo_unigene_BMK_23657; 1; bphyem107e01; -1	--	--	--	--	--	--	--	Phyllostachys edulis cDNA clone: bphyem107e01, full insert sequence	--	--
Munro_Bamboo_unigene_BMK_23674; 1; bphyst015i04; 1	--	--	--	--	Os02g0610800	--	hypothetical protein OsJ_07488 [Oryza sativa Japonica Group]	Phyllostachys edulis cDNA clone: bphyst015i04, full insert sequence	--	Os02g0610800 protein OS=Oryza sativa subsp. japonica GN=OJ1476_F05.22 PE=2 SV=1
Munro_Bamboo_unigene_BMK_23878; 1; bphyst009a15; 1	--	--	--	--	Os05g0542300	--	Os05g0542300 [Oryza sativa Japonica Group] gb|AAV67828.1| unknown protein [Oryza sativa Japonica Group] dbj|BAG88338.1| unnamed protein product [Oryza sativa Japonica Group] gb|EEC79623.1| hypothetical protein OsI_20834 [Oryza sativa Indica Group] gb|EEE64549.1| hypothetical protein OsJ_19401 [Oryza sativa Japonica Group] dbj|BAH93237.1| Os05g0542300 [Oryza sativa Japonica Group]	Phyllostachys edulis cDNA clone: bphyst009a15, full insert sequence	--	Os05g0542300 protein OS=Oryza sativa subsp. japonica GN=OJ1362_G11.18 PE=4 SV=1
Munro_Bamboo_unigene_BMK_23979; 1; Munro_Bamboo_unigene_BMK_8042; 1; bphyem205l19; -1	FOG: WD40 repeat	General function prediction only		Molecular Function: protein binding (GO:0005515);	IPR001680: WD40 repeat; IPR011047: Quinonprotein alcohol dehydrogenase-like	IPR015943: WD40/YVTN repeat-like-containing domain	IPR017986: WD40-repeat-containing domain	IPR019775: WD40 repeat, conserved site	IPR019781: WD40 repeat, subgroup	IPR019782: WD40 repeat 2	Os06g0598900; K13137 serine-threonine kinase receptor-associated protein	Genetic Information Processing; Transcription; Spliceosome [BR:ko03041] Genetic Information Processing; Translation; RNA transport [PATH:ko03013]	hypothetical protein OsI_23591 [Oryza sativa Indica Group]	Phyllostachys edulis cDNA clone: bphyem205l19, full insert sequence	Serine-threonine kinase receptor-associated protein OS=Rattus norvegicus GN=Strap PE=1 SV=1	Putative WD-40 repeat protein OS=Oryza sativa subsp. japonica GN=P0642B07.48-1 PE=4 SV=1
Munro_Bamboo_unigene_BMK_23988; 1; bphyst004h13; 1	--	--	--	--	--	--	--	Phyllostachys edulis cDNA clone: bphyst004h13, full insert sequence	--	--
Munro_Bamboo_unigene_BMK_24010; 1; bphyem109c12; 1; bphylf043a21; -1	--	--	--	--	Os02g0676800	--	hypothetical protein OsJ_07913 [Oryza sativa Japonica Group]	Phyllostachys edulis cDNA clone: bphyem109c12, full insert sequence	Ethylene-responsive transcription factor ERF025 OS=Arabidopsis thaliana GN=ERF025 PE=2 SV=1	Os02g0676800 protein OS=Oryza sativa subsp. japonica GN=P0135D07.36 PE=2 SV=1
Munro_Bamboo_unigene_BMK_24032; 1; bphylf057c17; -1	GTPase SAR1 and related small G proteins	General function prediction only		Biological Process: GTP catabolic process (GO:0006184);; Biological Process: intracellular protein transport (GO:0006886);	Biological Process: nucleocytoplasmic transport (GO:0006913);	Biological Process: protein transport (GO:0015031);	Biological Process: signal transduction (GO:0007165);	Biological Process: small GTPase mediated signal transduction (GO:0007264);	Cellular Component: intracellular (GO:0005622);	Cellular Component: membrane (GO:0016020);	Molecular Function: GTP binding (GO:0005525);	Molecular Function: GTPase activity (GO:0003924);	IPR001806: Small GTPase superfamily; IPR002041: Ran GTPase	IPR003578: Small GTPase superfamily, Rho type	IPR003579: Small GTPase superfamily, Rab type	IPR005225: Small GTP-binding protein domain	IPR020849: Small GTPase superfamily, Ras type	Os01g0611100; K07936 GTP-binding nuclear protein Ran	Genetic Information Processing; Translation; RNA transport [PATH:ko03013] Genetic Information Processing; Translation; Ribosome biogenesis in eukaryotes [PATH:ko03008] Environmental Information Processing; Signaling Molecules and Interaction; GTP-binding proteins [BR:ko04031]	hypothetical protein OsJ_02575 [Oryza sativa Japonica Group]	Phyllostachys edulis cDNA clone: bphylf057c17, full insert sequence	GTP-binding nuclear protein Ran-1 OS=Oryza sativa subsp. japonica GN=RAN1 PE=2 SV=1	cDNA clone:J023140D03, full insert sequence OS=Oryza sativa subsp. japonica PE=2 SV=1
Munro_Bamboo_unigene_BMK_24176; 1; bphyst039a15; -1	--	--	--	--	--	--	--	Phyllostachys edulis cDNA clone: bphyst039a15, full insert sequence	--	--
Munro_Bamboo_unigene_BMK_24226; 1; bphyst026n17; -1	--	--	--	--	Os07g0132300	--	unknown protein [Oryza sativa Japonica Group] gb|EAZ02671.1| hypothetical protein OsI_24783 [Oryza sativa Indica Group] gb|EAZ38598.1| hypothetical protein OsJ_22987 [Oryza sativa Japonica Group] dbj|BAH00994.1| unnamed protein product [Oryza sativa Japonica Group]	Phyllostachys edulis cDNA clone: bphyst026n17, full insert sequence	EPIDERMAL PATTERNING FACTOR-like protein 2 OS=Arabidopsis thaliana GN=EPFL2 PE=2 SV=1	Putative uncharacterized protein OS=Oryza sativa subsp. japonica GN=OJ1606_D04.120 PE=2 SV=1
Munro_Bamboo_unigene_BMK_24298; 1; bphyem207b21; 1	--	--	--	--	hypothetical protein; K08490 syntaxin 5	Genetic Information Processing; Folding, Sorting and Degradation; SNARE interactions in vesicular transport [PATH:ko04130] Genetic Information Processing; Folding, Sorting and Degradation; SNAREs [BR:ko04131]	Os01g0179200 [Oryza sativa Japonica Group] dbj|BAB07966.1| putative syntaxin of plants 31 [Oryza sativa Japonica Group] dbj|BAB63479.1| putative syntaxin of plants 31 [Oryza sativa Japonica Group] dbj|BAF04111.1| Os01g0179200 [Oryza sativa Japonica Group] gb|EAY72777.1| hypothetical protein OsI_00640 [Oryza sativa Indica Group] dbj|BAG97713.1| unnamed protein product [Oryza sativa Japonica Group]	Phyllostachys edulis cDNA clone: bphyem207b21, full insert sequence	Syntaxin-32 OS=Arabidopsis thaliana GN=SYP32 PE=2 SV=1	Os01g0179200 protein OS=Oryza sativa subsp. japonica GN=P0406H10.17 PE=2 SV=1
Munro_Bamboo_unigene_BMK_244; 1; bphyst008i12; -1; bphyst026p21; -1	--	--	--	--	Os06g0686600	--	Os06g0686600 [Oryza sativa Japonica Group] dbj|BAD46046.1| unknown protein [Oryza sativa Japonica Group] dbj|BAF20316.1| Os06g0686600 [Oryza sativa Japonica Group] gb|EAZ02142.1| hypothetical protein OsI_24232 [Oryza sativa Indica Group] gb|EAZ38069.1| hypothetical protein OsJ_22415 [Oryza sativa Japonica Group]	Phyllostachys edulis cDNA clone: bphyst008i12, full insert sequence	--	Os06g0686600 protein OS=Oryza sativa subsp. japonica GN=P0623A10.12 PE=4 SV=1
Munro_Bamboo_unigene_BMK_24449; 1; bphylf060n14; -1	Chaperonin GroEL (HSP60 family)	Posttranslational modification, protein turnover, chaperones		Biological Process: cellular protein metabolic process (GO:0044267);; Biological Process: protein folding (GO:0006457);	Biological Process: protein refolding (GO:0042026);	Cellular Component: cytoplasm (GO:0005737);	Molecular Function: ATP binding (GO:0005524);	IPR001844: Chaperonin Cpn60; IPR002423: Chaperonin Cpn60/TCP-1	IPR018370: Chaperonin Cpn60, conserved site	Os10g0462900; K04077 chaperonin GroEL	Genetic Information Processing; Folding, Sorting and Degradation; Chaperones and folding catalysts [BR:ko03110] Genetic Information Processing; Folding, Sorting and Degradation; RNA degradation [PATH:ko03018] Human Diseases; Metabolic Diseases; Type I diabetes mellitus [PATH:ko04940]	Chaperonin CPN60-1, mitochondrial precursor, putative, expressed [Oryza sativa Japonica Group]	Phyllostachys edulis cDNA clone: bphylf060n14, full insert sequence	Chaperonin CPN60-2, mitochondrial OS=Zea mays GN=CPN60II PE=2 SV=1	Chaperonin CPN60-1, mitochondrial, putative, expressed OS=Oryza sativa subsp. japonica GN=LOC_Os10g32550 PE=3 SV=1
Munro_Bamboo_unigene_BMK_24504; 1; bphyem106f13; -1	--	--	Biological Process: sexual reproduction (GO:0019953);; Cellular Component: extracellular region (GO:0005576);	IPR005795: Major pollen allergen Lol pI; IPR007112: Expansin/pollen allergen, DPBB domain	IPR007118: Expansin/Lol pI	IPR009009: Barwin-related endoglucanase	IPR014733: Barwin-like endoglucanase	hypothetical protein	--	triticum beta-expansin [Brachypodium distachyon]	Phyllostachys edulis cDNA clone: bphyem106f13, full insert sequence	Expansin-B4 OS=Oryza sativa subsp. japonica GN=EXPB4 PE=2 SV=1	Triticum beta-expansin OS=Brachypodium distachyon PE=3 SV=1
Munro_Bamboo_unigene_BMK_24649; 1; bphyem202b13; 1	Predicted GTPase	General function prediction only		Biological Process: barrier septum formation (GO:0000917);; Cellular Component: intracellular (GO:0005622);	Molecular Function: GTP binding (GO:0005525);	IPR002917: GTP-binding domain, HSR1-related; IPR019987: GTP-binding protein, ribosome biogenesis, YsxC	hypothetical protein; K03978 GTP-binding protein	Unclassified; Poorly Characterized; General function prediction only	hypothetical protein SORBIDRAFT_03g033710 [Sorghum bicolor] gb|EES01419.1| hypothetical protein SORBIDRAFT_03g033710 [Sorghum bicolor]	Phyllostachys edulis cDNA clone: bphyem202b13, full insert sequence	GTP-binding protein At2g22870 OS=Arabidopsis thaliana GN=EMB2001 PE=2 SV=2	Putative uncharacterized protein Sb03g033710 OS=Sorghum bicolor GN=Sb03g033710 PE=3 SV=1
Munro_Bamboo_unigene_BMK_24677; 1; bphyem213l18; -1	--	--	--	--	Os04g0657500	--	hypothetical protein OsI_17743 [Oryza sativa Indica Group]	Phyllostachys edulis cDNA clone: bphyem213l18, full insert sequence	Serine/arginine repetitive matrix protein 2 OS=Homo sapiens GN=SRRM2 PE=1 SV=2	OSJNBa0071I13.19 protein OS=Oryza sativa subsp. japonica GN=OSJNBa0071I13.19 PE=2 SV=1
Munro_Bamboo_unigene_BMK_24898; 1; bphyem205g12; -1	--	--	Molecular Function: protein binding (GO:0005515);	IPR006652: Kelch repeat type 1; IPR015916: Galactose oxidase, beta-propeller	Os04g0619300	--	H0313F03.20 [Oryza sativa Indica Group] emb|CAJ86391.1| H0114G12.4 [Oryza sativa Indica Group]	Phyllostachys edulis cDNA clone: bphyem205g12, full insert sequence	F-box/kelch-repeat protein At5g60570 OS=Arabidopsis thaliana GN=At5g60570 PE=2 SV=1	H0114G12.4 protein OS=Oryza sativa GN=H0313F03.20 PE=4 SV=1
Munro_Bamboo_unigene_BMK_25; 1; bphyst003g07; 1	--	--	--	--	hypothetical protein LOC100277851	--	unknown protein [Oryza sativa Japonica Group] gb|AAP55147.1| NADH-ubiquinone oxidoreductase, putative, expressed [Oryza sativa Japonica Group] gb|EAY79625.1| hypothetical protein OsI_34770 [Oryza sativa Indica Group] gb|EAZ17076.1| hypothetical protein OsJ_32574 [Oryza sativa Japonica Group]	Phyllostachys edulis cDNA clone: bphyst003g07, full insert sequence	NADH dehydrogenase [ubiquinone] iron-sulfur protein 6 OS=Arabidopsis thaliana GN=At1g49140 PE=3 SV=1	Putative uncharacterized protein OSJNBa0027L23.4 OS=Oryza sativa GN=OSJNBa0027L23.4 PE=4 SV=1
Munro_Bamboo_unigene_BMK_2501; 1; bphyst031g14; 1	Enoyl-CoA hydratase/carnithine racemase	Lipid transport and metabolism		Biological Process: metabolic process (GO:0008152);; Molecular Function: catalytic activity (GO:0003824);	IPR001753: Crotonase, core; IPR014748: Crontonase, C-terminal	IPR018376: Enoyl-CoA hydratase/isomerase, conserved site	Os02g0654100; K05607 methylglutaconyl-CoA hydratase [EC:4.2.1.18]	Metabolism; Amino Acid Metabolism; Valine, leucine and isoleucine degradation [PATH:ko00280]	hypothetical protein OsI_08315 [Oryza sativa Indica Group]	Phyllostachys edulis cDNA clone: bphyst031g14, full insert sequence	Methylglutaconyl-CoA hydratase, mitochondrial OS=Dictyostelium discoideum GN=auh PE=3 SV=1	Putative uncharacterized protein OS=Oryza sativa subsp. indica GN=OsI_08315 PE=3 SV=1
Munro_Bamboo_unigene_BMK_25191; 1; bphylf027h10; -1	Ribosomal protein L21	Translation, ribosomal structure and biogenesis		--	--	Os02g0259600; K02888 large subunit ribosomal protein L21	Genetic Information Processing; Translation; Ribosome  Genetic Information Processing; Translation; Ribosome [BR:ko03011]	Os02g0259600 [Oryza sativa Japonica Group] dbj|BAD20071.1| putative 50S ribosomal protein L21, chloroplast [Oryza sativa Japonica Group] dbj|BAD20117.1| putative 50S ribosomal protein L21, chloroplast [Oryza sativa Japonica Group] dbj|BAF08393.1| Os02g0259600 [Oryza sativa Japonica Group] gb|EAZ22476.1| hypothetical protein OsJ_06142 [Oryza sativa Japonica Group] dbj|BAG89246.1| unnamed protein product [Oryza sativa Japonica Group] dbj|BAG96634.1| unnamed protein product [Oryza sativa Japonica Group]	Phyllostachys edulis cDNA clone: bphylf027h10, full insert sequence	50S ribosomal protein L21, chloroplastic OS=Arabidopsis thaliana GN=RPL21 PE=2 SV=1	Os02g0259600 protein OS=Oryza sativa subsp. japonica GN=B1178F07.15 PE=2 SV=1
Munro_Bamboo_unigene_BMK_25211; 1; bphylf054g12; 1	--	--	--	--	hypothetical protein	--	hypothetical protein SORBIDRAFT_10g013720 [Sorghum bicolor] gb|EER89725.1| hypothetical protein SORBIDRAFT_10g013720 [Sorghum bicolor]	Phyllostachys edulis cDNA clone: bphylf054g12, full insert sequence	Putative cysteine-rich receptor-like protein kinase 12 OS=Arabidopsis thaliana GN=CRK12 PE=2 SV=2	Putative uncharacterized protein Sb10g013720 OS=Sorghum bicolor GN=Sb10g013720 PE=4 SV=1
Munro_Bamboo_unigene_BMK_25384; 1; bphylf049a06; 1	--	--	--	--	hypothetical protein	--	hypothetical protein SORBIDRAFT_04g037130 [Sorghum bicolor] gb|EES07753.1| hypothetical protein SORBIDRAFT_04g037130 [Sorghum bicolor]	Phyllostachys edulis cDNA clone: bphylf049a06, full insert sequence	GDSL esterase/lipase LTL1 OS=Arabidopsis thaliana GN=LTL1 PE=2 SV=1	Putative uncharacterized protein Sb04g037130 OS=Sorghum bicolor GN=Sb04g037130 PE=4 SV=1
Munro_Bamboo_unigene_BMK_25483; 1; bphylf029c02; 1; bphylf058m17; 1	--	--	--	--	hypothetical protein	--	putative Myb-related protein [Oryza sativa Japonica Group] gb|AAP55017.1| ZmMybst1, putative, expressed [Oryza sativa Japonica Group] gb|EAZ16977.1| hypothetical protein OsJ_32461 [Oryza sativa Japonica Group] gb|ACF60472.1| myb transcription factor [Oryza sativa Japonica Group] dbj|BAG94895.1| unnamed protein product [Oryza sativa Japonica Group]	Phyllostachys edulis cDNA clone: bphylf029c02, full insert sequence	Extensin OS=Nicotiana tabacum GN=HRGPNT3 PE=2 SV=1	Putative Myb-related protein OS=Oryza sativa GN=OSJNBb0089A17.8 PE=4 SV=1
Munro_Bamboo_unigene_BMK_25488; 1; bphylf036b03; 1	--	--	Biological Process: lipid transport (GO:0006869);	IPR013770: Plant lipid transfer protein/hydrophobic protein, helical domain; IPR016140: Bifunctional inhibitor/plant lipid transfer protein/seed storage	si660015b07; LOC100285869	--	LOC100285869 [Zea mays] gb|ACG46517.1| lipid binding protein [Zea mays]	Phyllostachys edulis cDNA clone: bphylf036b03, full insert sequence	--	Lipid binding protein OS=Zea mays PE=2 SV=1
Munro_Bamboo_unigene_BMK_25527; 1; bphyem103o23; 1	--	--	--	--	hypothetical protein	--	hypothetical protein SORBIDRAFT_06g003250 [Sorghum bicolor] gb|EES10521.1| hypothetical protein SORBIDRAFT_06g003250 [Sorghum bicolor]	Phyllostachys edulis cDNA clone: bphyem103o23, full insert sequence	Expansin-A1 OS=Oryza sativa subsp. japonica GN=EXPA1 PE=2 SV=2	Putative uncharacterized protein Sb06g003250 OS=Sorghum bicolor GN=Sb06g003250 PE=3 SV=1
Munro_Bamboo_unigene_BMK_25587; -1; Munro_Bamboo_unigene_BMK_49078; 1; bphylf046h02; 1	--	--	--	--	Os06g0102100	--	hypothetical protein OsI_21265 [Oryza sativa Indica Group]	Phyllostachys edulis cDNA clone: bphylf046h02, full insert sequence	Cytochrome P450 93A2 OS=Glycine max GN=CYP93A2 PE=2 SV=1	Os06g0102100 protein OS=Oryza sativa subsp. japonica GN=OSJNBa0075G19.13 PE=2 SV=1
Munro_Bamboo_unigene_BMK_25612; 1; bphylf052a08; -1	EMAP domain	General function prediction only		Molecular Function: tRNA binding (GO:0000049);	IPR002547: tRNA-binding domain; IPR012340: Nucleic acid-binding, OB-fold	IPR016027: Nucleic acid-binding, OB-fold-like	Os04g0303900	--	Os04g0303900 [Oryza sativa Japonica Group] dbj|BAF14327.1| Os04g0303900 [Oryza sativa Japonica Group]	Phyllostachys edulis cDNA clone: bphylf052a08, full insert sequence	Probable methionyl-tRNA synthetase OS=Oryza sativa subsp. japonica GN=Os06g0508700 PE=2 SV=2	OSJNBa0079M09.8 protein OS=Oryza sativa subsp. japonica GN=OSJNBa0079M09.8 PE=4 SV=1
Munro_Bamboo_unigene_BMK_25769; 1; bphylf058m01; 1	--	--	--	--	Os05g0344400	--	hypothetical protein OsJ_18144 [Oryza sativa Japonica Group]	Phyllostachys edulis cDNA clone: bphylf058m01, full insert sequence	UPF0497 membrane protein Os05g0344400 OS=Oryza sativa subsp. japonica GN=Os05g0344400 PE=2 SV=1	Putative uncharacterized protein OS=Oryza sativa subsp. japonica GN=OsJ_18144 PE=4 SV=1
Munro_Bamboo_unigene_BMK_25824; 1; bphyem111d08; 1	Predicted amidohydrolase	General function prediction only		Biological Process: nitrogen compound metabolic process (GO:0006807);; Molecular Function: hydrolase activity, acting on carbon-nitrogen (but not peptide) bonds (GO:0016810);	IPR003010: Nitrilase/cyanide hydratase and apolipoprotein N-acyltransferase	Os06g0206000	--	Os06g0206000 [Oryza sativa Japonica Group] dbj|BAF19007.1| Os06g0206000 [Oryza sativa Japonica Group] gb|EAZ00083.1| hypothetical protein OsI_22087 [Oryza sativa Indica Group] gb|EAZ36205.1| hypothetical protein OsJ_20521 [Oryza sativa Japonica Group]	Phyllostachys edulis cDNA clone: bphyem111d08, full insert sequence	Omega-amidase NIT2 OS=Homo sapiens GN=NIT2 PE=1 SV=1	Putative Nit protein 2 OS=Oryza sativa subsp. japonica GN=OSJNBb0015B15.29 PE=4 SV=1
Munro_Bamboo_unigene_BMK_25873; 1; Munro_Bamboo_unigene_BMK_35257; -1; bphylf056e22; 1	Serine/threonine protein kinase	--		Biological Process: protein phosphorylation (GO:0006468);; Molecular Function: ATP binding (GO:0005524);	Molecular Function: protein kinase activity (GO:0004672);	Molecular Function: transferase activity, transferring phosphorus-containing groups (GO:0016772);	IPR000719: Protein kinase, catalytic domain; IPR011009: Protein kinase-like domain	IPR017442: Serine/threonine-protein kinase-like domain	Os01g0872800; K06276 3-phosphoinositide dependent protein kinase-1 [EC:2.7.11.1]	Metabolism; Enzyme Families; Protein kinases [BR:ko01001] Environmental Information Processing; Signal Transduction; mTOR signaling pathway  Cellular Processes; Cell Communication; Focal adhesion  Organismal Systems; Endocrine System; Insulin signaling pathway  Organismal Systems; Endocrine System; PPAR signaling pathway  Organismal Systems; Excretory System; Aldosterone-regulated sodium reabsorption  Human Diseases; Cancers; Prostate cancer  Human Diseases; Cancers; Endometrial cancer  Human Diseases; Cancers; Non-small cell lung cancer	unknown [Zea mays] gb|ACN35750.1| unknown [Zea mays]	Phyllostachys edulis cDNA clone: bphylf056e22, full insert sequence	3-phosphoinositide-dependent protein kinase 2 OS=Arabidopsis thaliana GN=PDK2 PE=1 SV=1	3-phosphoinositide dependent protein kinase 1 OS=Zea mays GN=PDK1 PE=2 SV=1
Munro_Bamboo_unigene_BMK_26079; 1; bphylf035b11; 1	--	--	--	--	Os12g0609600	--	Os12g0609600 [Oryza sativa Japonica Group] gb|ABA99357.1| expressed protein [Oryza sativa Japonica Group] dbj|BAF30263.1| Os12g0609600 [Oryza sativa Japonica Group] dbj|BAG99136.1| unnamed protein product [Oryza sativa Japonica Group]	Phyllostachys edulis cDNA clone: bphylf035b11, full insert sequence	--	Expressed protein OS=Oryza sativa subsp. japonica GN=Os12g0609600 PE=2 SV=1
Munro_Bamboo_unigene_BMK_26162; 1; bphyem206m15; -1	--	--	Biological Process: proteolysis (GO:0006508);; Molecular Function: cysteine-type endopeptidase activity (GO:0004197);	Molecular Function: cysteine-type peptidase activity (GO:0008234);	IPR000118: Granulin; IPR000169: Peptidase, cysteine peptidase active site	IPR000668: Peptidase C1A, papain C-terminal	IPR013128: Peptidase C1A, papain	IPR013201: Proteinase inhibitor I29, cathepsin propeptide	Os04g0670200	--	Os04g0670200 [Oryza sativa Japonica Group] sp|P25777.2|ORYB_ORYSJ RecName: Full=Oryzain beta chain; Flags: Precursor emb|CAE02823.1| OSJNBa0043A12.28 [Oryza sativa Japonica Group] emb|CAJ86092.1| H0818H01.14 [Oryza sativa Indica Group] gb|EAY95991.1| hypothetical protein OsI_17862 [Oryza sativa Indica Group] dbj|BAG98700.1| unnamed protein product [Oryza sativa Japonica Group] dbj|BAF16125.2| Os04g0670200 [Oryza sativa Japonica Group]	Phyllostachys edulis cDNA clone: bphyem206m15, full insert sequence	Oryzain beta chain OS=Oryza sativa subsp. japonica GN=Os04g0670200 PE=1 SV=2	Os04g0670200 protein OS=Oryza sativa subsp. japonica GN=Os04g0670200 PE=2 SV=2
Munro_Bamboo_unigene_BMK_26340; 1; bphylf036l12; 1	--	--	--	--	cl6408_-2; LOC100191162	--	hypothetical protein OsJ_05929 [Oryza sativa Japonica Group]	Phyllostachys edulis cDNA clone: bphylf036l12, full insert sequence	--	Putative uncharacterized protein OS=Oryza sativa subsp. japonica GN=OsJ_05929 PE=4 SV=1
Munro_Bamboo_unigene_BMK_26441; 1; bphyst005o06; -1	--	--	--	--	Os05g0509700	--	hypothetical protein OsJ_14429 [Oryza sativa Japonica Group]	Phyllostachys edulis cDNA clone: bphyst005o06, full insert sequence	Single-stranded DNA-binding protein, mitochondrial OS=Arabidopsis thaliana GN=At4g11060 PE=2 SV=1	Putative uncharacterized protein OS=Oryza sativa subsp. japonica GN=OsJ_14429 PE=4 SV=1
Munro_Bamboo_unigene_BMK_26496; 1; bphylf031f09; 1	--	--	--	IPR012866: Protein of unknown function DUF1644	Os06g0693700	--	hypothetical protein OsI_24292 [Oryza sativa Indica Group]	Phyllostachys edulis cDNA clone: bphylf031f09, full insert sequence	--	Os06g0693700 protein OS=Oryza sativa subsp. japonica GN=P0550B04.19-1 PE=2 SV=1
Munro_Bamboo_unigene_BMK_26539; 1; bphyem109l23; -1	--	--	Molecular Function: cysteine-type endopeptidase inhibitor activity (GO:0004869);	IPR000010: Proteinase inhibitor I25, cystatin; IPR018073: Proteinase inhibitor I25, cystatin, conserved site	IPR020381: Proteinase inhibitor I25, cystatin, conserved region	Os01g0270100	--	multidomain cystatin [Triticum aestivum]	Phyllostachys edulis cDNA clone: bphyem109l23, full insert sequence	Cysteine proteinase inhibitor 12 OS=Oryza sativa subsp. japonica GN=Os01g0270100 PE=2 SV=1	Multidomain cystatin OS=Triticum aestivum GN=TaMDC1 PE=2 SV=1
Munro_Bamboo_unigene_BMK_26627; 1; bphyem207e06; -1	--	--	Biological Process: nucleosome assembly (GO:0006334);; Cellular Component: nucleus (GO:0005634);	IPR002164: Nucleosome assembly protein (NAP)	Os05g0539700; K11279 nucleosome assembly protein 1-like 1	Genetic Information Processing; Replication and Repair; Chromosome [BR:ko03036]	Os05g0539700 [Oryza sativa Japonica Group] gb|AAV59408.1| putative nucleosome assembly protein [Oryza sativa Japonica Group] dbj|BAF18089.1| Os05g0539700 [Oryza sativa Japonica Group] dbj|BAG92324.1| unnamed protein product [Oryza sativa Japonica Group] gb|EEE64526.1| hypothetical protein OsJ_19377 [Oryza sativa Japonica Group]	Phyllostachys edulis cDNA clone: bphyem207e06, full insert sequence	Nucleosome assembly protein 1-like 1 OS=Rattus norvegicus GN=Nap1l1 PE=2 SV=1	Nucleosome assembly protein 1-like protein 2 OS=Oryza sativa GN=nap1_L2 PE=2 SV=1
Munro_Bamboo_unigene_BMK_2669; 1; bphyem213f19; -1	--	--	Biological Process: metal ion transport (GO:0030001);; Biological Process: transmembrane transport (GO:0055085);	Cellular Component: integral to membrane (GO:0016021);	Molecular Function: metal ion binding (GO:0046872);	IPR011541: Nickel/cobalt transporter, high-affinity	Os03g0156700	--	hypothetical protein OsI_10081 [Oryza sativa Indica Group]	Phyllostachys edulis cDNA clone: bphyem213f19, full insert sequence	--	Putative uncharacterized protein OS=Oryza sativa subsp. indica GN=OsI_10081 PE=4 SV=1
Munro_Bamboo_unigene_BMK_26695; 1; bphyst009d24; 1; bphyst026e06; 1	Ribosomal protein L14E/L6E/L27E	Translation, ribosomal structure and biogenesis		Biological Process: translation (GO:0006412);; Cellular Component: intracellular (GO:0005622);	Cellular Component: ribosome (GO:0005840);	Molecular Function: structural constituent of ribosome (GO:0003735);	IPR000915: Ribosomal protein L6E; IPR014722: Translation protein SH3-like, subgroup	Os04g0473400; K02934 large subunit ribosomal protein L6e	Genetic Information Processing; Translation; Ribosome  Genetic Information Processing; Translation; Ribosome [BR:ko03011]	H0305E08.7 [Oryza sativa Indica Group]	Phyllostachys edulis cDNA clone: bphyst026e06, full insert sequence	60S ribosomal protein L6 OS=Mesembryanthemum crystallinum GN=RPL6 PE=2 SV=1	60S ribosomal protein L6 OS=Oryza sativa subsp. japonica GN=OSJNBb0022F23.11 PE=2 SV=2
Munro_Bamboo_unigene_BMK_267; 1; bphyem103m08; -1	GTPase SAR1 and related small G proteins	General function prediction only		Biological Process: GTP catabolic process (GO:0006184);; Biological Process: protein transport (GO:0015031);	Biological Process: signal transduction (GO:0007165);	Biological Process: small GTPase mediated signal transduction (GO:0007264);	Cellular Component: intracellular (GO:0005622);	Cellular Component: membrane (GO:0016020);	Molecular Function: GTP binding (GO:0005525);	Molecular Function: GTPase activity (GO:0003924);	IPR001806: Small GTPase superfamily; IPR003578: Small GTPase superfamily, Rho type	IPR003579: Small GTPase superfamily, Rab type	IPR005225: Small GTP-binding protein domain	IPR020849: Small GTPase superfamily, Ras type	hypothetical protein; K04392 Ras-related C3 botulinum toxin substrate 1	Environmental Information Processing; Signal Transduction; MAPK signaling pathway [PATH:ko04010] Environmental Information Processing; Signal Transduction; Wnt signaling pathway [PATH:ko04310] Environmental Information Processing; Signal Transduction; VEGF signaling pathway [PATH:ko04370] Environmental Information Processing; Signaling Molecules and Interaction; GTP-binding proteins [BR:ko04031] Cellular Processes; Transport and Catabolism; Phagosome [PATH:ko04145] Cellular Processes; Cell Motility; Regulation of actin cytoskeleton [PATH:ko04810] Cellular Processes; Cell Communication; Focal adhesion [PATH:ko04510] Cellular Processes; Cell Communication; Adherens junction [PATH:ko04520] Organismal Systems; Immune System; Toll-like receptor signaling pathway [PATH:ko04620] Organismal Systems; Immune System; Natural killer cell mediated cytotoxicity [PATH:ko04650] Organismal Systems; Immune System; B cell receptor signaling pathway [PATH:ko04662] Organismal Systems; Immune System; Fc epsilon RI signaling pathway [PATH:ko04664] Organismal Systems; Immune System; Fc gamma R-mediated phagocytosis [PATH:ko04666] Organismal Systems; Immune System; Leukocyte transendothelial migration [PATH:ko04670] Organismal Systems; Immune System; Chemokine signaling pathway [PATH:ko04062] Organismal Systems; Digestive System; Pancreatic secretion [PATH:ko04972] Organismal Systems; Nervous System; Neurotrophin signaling pathway [PATH:ko04722] Organismal Systems; Development; Axon guidance [PATH:ko04360] Organismal Systems; Development; Osteoclast differentiation [PATH:ko04380] Human Diseases; Cancers; Pathways in cancer [PATH:ko05200] Human Diseases; Cancers; Colorectal cancer [PATH:ko05210] Human Diseases; Cancers; Pancreatic cancer [PATH:ko05212] Human Diseases; Cancers; Renal cell carcinoma [PATH:ko05211] Human Diseases; Neurodegenerative Diseases; Amyotrophic lateral sclerosis (ALS) [PATH:ko05014] Human Diseases; Cardiovascular Diseases; Viral myocarditis [PATH:ko05416] Human Diseases; Infectious Diseases; Epithelial cell signaling in Helicobacter pylori infection [PATH:ko05120] Human Diseases; Infectious Diseases; Shigellosis [PATH:ko05131] Human Diseases; Infectious Diseases; Bacterial invasion of epithelial cells [PATH:ko05100]	hypothetical protein SORBIDRAFT_04g028280 [Sorghum bicolor] gb|EES05544.1| hypothetical protein SORBIDRAFT_04g028280 [Sorghum bicolor]	Phyllostachys edulis cDNA clone: bphyem103m08, full insert sequence	Rac-like GTP-binding protein 3 OS=Oryza sativa subsp. japonica GN=RAC3 PE=2 SV=1	Putative uncharacterized protein Sb04g028280 OS=Sorghum bicolor GN=Sb04g028280 PE=3 SV=1
Munro_Bamboo_unigene_BMK_2678; 1; bphylf051i04; -1	--	--	--	--	hypothetical protein LOC100192694	--	hypothetical protein LOC100192694 [Zea mays] gb|ACF79754.1| unknown [Zea mays] gb|ACN33543.1| unknown [Zea mays]	Phyllostachys edulis cDNA clone: bphylf051i04, full insert sequence	--	Putative uncharacterized protein OS=Zea mays PE=2 SV=1
Munro_Bamboo_unigene_BMK_2686; 1; Munro_Bamboo_unigene_BMK_61063; -1; bphylf028c14; 1	Superfamily II DNA and RNA helicases	--		Molecular Function: ATP binding (GO:0005524);; Molecular Function: ATP-dependent helicase activity (GO:0008026);	Molecular Function: nucleic acid binding (GO:0003676);	IPR011545: DNA/RNA helicase, DEAD/DEAH box type, N-terminal; IPR014014: RNA helicase, DEAD-box type, Q motif	Os04g0533000; K12614 ATP-dependent RNA helicase DDX6/DHH1 [EC:3.6.4.13]	Genetic Information Processing; Folding, Sorting and Degradation; RNA degradation [PATH:ko03018]	unknown [Zea mays]	Phyllostachys edulis cDNA clone: bphylf028c14, full insert sequence	DEAD-box ATP-dependent RNA helicase 6 OS=Oryza sativa subsp. japonica GN=Os04g0533000 PE=2 SV=1	Putative uncharacterized protein OS=Zea mays PE=2 SV=1
Munro_Bamboo_unigene_BMK_27007; 1; bphyst038a06; 1	--	--	Cellular Component: intracellular (GO:0005622);; Molecular Function: nucleic acid binding (GO:0003676);	Molecular Function: zinc ion binding (GO:0008270);	IPR007087: Zinc finger, C2H2; IPR013087: Zinc finger, C2H2-type/integrase, DNA-binding	Os03g0239300	--	Os03g0239300 [Oryza sativa Japonica Group] gb|ABF94874.1| Zinc finger, C2H2 type family protein, expressed [Oryza sativa Japonica Group] gb|ABF94875.1| Zinc finger, C2H2 type family protein, expressed [Oryza sativa Japonica Group] dbj|BAF11419.1| Os03g0239300 [Oryza sativa Japonica Group] gb|EAY89193.1| hypothetical protein OsI_10690 [Oryza sativa Indica Group] dbj|BAG89786.1| unnamed protein product [Oryza sativa Japonica Group] dbj|BAG92684.1| unnamed protein product [Oryza sativa Japonica Group] gb|ADX60229.1| C2H2 transcription factor [Oryza sativa Japonica Group]	Phyllostachys edulis cDNA clone: bphyst038a06, full insert sequence	Zinc finger protein 1 OS=Arabidopsis thaliana GN=ZFP1 PE=2 SV=1	Os03g0239300 protein OS=Oryza sativa subsp. japonica GN=Os03g0239300 PE=2 SV=1
Munro_Bamboo_unigene_BMK_27100; 1; bphylf027i16; -1	--	--	--	IPR008512: APO protein, plant; IPR023342: APO domain	hypothetical protein LOC100194271	--	hypothetical protein LOC100194271 [Zea mays] gb|ACF81776.1| unknown [Zea mays]	Phyllostachys edulis cDNA clone: bphylf027i16, full insert sequence	APO protein 2, chloroplastic OS=Arabidopsis thaliana GN=APO2 PE=2 SV=1	Putative uncharacterized protein OS=Zea mays PE=2 SV=1
Munro_Bamboo_unigene_BMK_27287; 1; bphyst003m23; -1	Ribosomal protein L24E	Translation, ribosomal structure and biogenesis		Biological Process: translation (GO:0006412);; Cellular Component: ribosome (GO:0005840);	Molecular Function: structural constituent of ribosome (GO:0003735);	IPR000988: Ribosomal protein L24e-related; IPR011017: TRASH	IPR023441: Ribosomal protein L24e domain	IPR023442: Ribosomal protein L24e, conserved site	TIDP3612; LOC100193634; K02896 large subunit ribosomal protein L24e	Genetic Information Processing; Translation; Ribosome  Genetic Information Processing; Translation; Ribosome [BR:ko03011]	hypothetical protein OsI_25404 [Oryza sativa Indica Group]	Phyllostachys edulis cDNA clone: bphyst003m23, full insert sequence	60S ribosomal protein L24 OS=Hordeum vulgare GN=RPL24 PE=2 SV=1	Putative uncharacterized protein OS=Oryza sativa subsp. indica GN=OsI_25404 PE=4 SV=1
Munro_Bamboo_unigene_BMK_27294; 1; bphyst031k16; 1	--	--	Biological Process: regulation of transcription, DNA-dependent (GO:0006355);; Cellular Component: nucleus (GO:0005634);	Molecular Function: DNA binding (GO:0003677);	Molecular Function: protein binding (GO:0005515);	Molecular Function: sequence-specific DNA binding (GO:0043565);	Molecular Function: sequence-specific DNA binding transcription factor activity (GO:0003700);	IPR001356: Homeobox; IPR005539: ELK	IPR005541: KNOX2	IPR008422: Homeobox KN domain	IPR009057: Homeodomain-like	IPR012287: Homeodomain-related	hypothetical protein	--	hypothetical protein SORBIDRAFT_09g002520 [Sorghum bicolor] gb|EES18954.1| hypothetical protein SORBIDRAFT_09g002520 [Sorghum bicolor]	Phyllostachys edulis cDNA clone: bphyst031k16, full insert sequence	Homeobox protein knotted-1-like 10 OS=Oryza sativa subsp. japonica GN=OSH71 PE=2 SV=1	Putative uncharacterized protein Sb09g002520 OS=Sorghum bicolor GN=Sb09g002520 PE=3 SV=1
Munro_Bamboo_unigene_BMK_27299; 1; bphyem112g06; -1	--	--	--	--	hypothetical protein; K12870 pre-mRNA-splicing factor ISY1	Genetic Information Processing; Transcription; Spliceosome [PATH:ko03040] Genetic Information Processing; Transcription; Spliceosome [BR:ko03041]	2 coiled coil domains of eukaryotic origin (31.3 kD)-like protein [Oryza sativa Japonica Group] dbj|BAD22171.1| 2 coiled coil domains of eukaryotic origin (31.3 kD)-like protein [Oryza sativa Japonica Group] gb|EAY86584.1| hypothetical protein OsI_07964 [Oryza sativa Indica Group] gb|EAZ23717.1| hypothetical protein OsJ_07419 [Oryza sativa Japonica Group] dbj|BAG89075.1| unnamed protein product [Oryza sativa Japonica Group]	Phyllostachys edulis cDNA clone: bphyem112g06, full insert sequence	Pre-mRNA-splicing factor ISY1 homolog OS=Rattus norvegicus GN=Isy1 PE=2 SV=1	2 coiled coil domains of eukaryotic origin (31.3 kD)-like protein OS=Oryza sativa subsp. japonica GN=OJ1791_B03.50-2 PE=2 SV=1
Munro_Bamboo_unigene_BMK_27329; 1; bphyem003p13; -1; bphyst002i23; -1	--	--	--	--	Os02g0121800	--	Os02g0121800 [Oryza sativa Japonica Group] gb|AAK73694.1| succinate dehydrogenase subunit 3 [Oryza sativa] dbj|BAD07607.1| succinate dehydrogenase subunit 3 [Oryza sativa Japonica Group] dbj|BAF07635.1| Os02g0121800 [Oryza sativa Japonica Group] dbj|BAG95982.1| unnamed protein product [Oryza sativa Japonica Group] gb|EEE56205.1| hypothetical protein OsJ_05172 [Oryza sativa Japonica Group]	Phyllostachys edulis cDNA clone: bphyst002i23, full insert sequence	--	Succinate dehydrogenase subunit 3 OS=Oryza sativa GN=sdh3 PE=4 SV=1
Munro_Bamboo_unigene_BMK_27336; 1; bphylf034h05; -1	--	--	--	--	hypothetical protein LOC100272352	--	hypothetical protein LOC100272352 [Zea mays] gb|ACF83547.1| unknown [Zea mays]	Phyllostachys edulis cDNA clone: bphylf034h05, full insert sequence	--	Putative uncharacterized protein OS=Zea mays PE=2 SV=1
Munro_Bamboo_unigene_BMK_2750; -1; Munro_Bamboo_unigene_BMK_39892; 1; bphylf046m09; 1	--	--	--	IPR004253: Domain of unknown function DUF231, plant	Os01g0914800	--	hypothetical protein OsI_04903 [Oryza sativa Indica Group]	Phyllostachys edulis cDNA clone: bphylf046m09, full insert sequence	--	Leaf senescence protein-like OS=Oryza sativa subsp. japonica GN=P0004D12.12 PE=4 SV=1
Munro_Bamboo_unigene_BMK_27572; 1; bphylf034g02; 1	--	--	--	--	Os07g0467500	--	Os07g0467500 [Oryza sativa Japonica Group] dbj|BAD31080.1| growth-regulating factor 1-like protein [Oryza sativa Japonica Group] tpg|DAA04955.1| TPA_exp: growth-regulating factor 11 [Oryza sativa (japonica cultivar-group)] dbj|BAF21505.1| Os07g0467500 [Oryza sativa Japonica Group] gb|EAZ03799.1| hypothetical protein OsI_25928 [Oryza sativa Indica Group] gb|EAZ39737.1| hypothetical protein OsJ_24174 [Oryza sativa Japonica Group] dbj|BAG89951.1| unnamed protein product [Oryza sativa Japonica Group]	Phyllostachys edulis cDNA clone: bphylf034g02, full insert sequence	--	Growth-regulating factor 1-like protein OS=Oryza sativa subsp. japonica GN=GRF11 PE=2 SV=1
Munro_Bamboo_unigene_BMK_27578; 1; bphyem212o08; 1	--	--	--	--	Os01g0239000	--	hypothetical protein OsJ_01047 [Oryza sativa Japonica Group]	Phyllostachys edulis cDNA clone: bphyem212o08, full insert sequence	Putative uncharacterized protein DDB_G0283467 OS=Dictyostelium discoideum GN=DDB_G0283467 PE=4 SV=1	Putative transcription factor OsGLK2 (Fragment) OS=Oryza sativa GN=Glk2 PE=4 SV=1
Munro_Bamboo_unigene_BMK_27659; 1; bphyem209d23; -1	Di- and tricarboxylate transporters	Inorganic ion transport and metabolism		Biological Process: sodium ion transport (GO:0006814);; Biological Process: transmembrane transport (GO:0055085);	Cellular Component: membrane (GO:0016020);	Molecular Function: transporter activity (GO:0005215);	IPR001898: Sodium/sulphate symporter	pDCT2, ZmpDCT2; plastidic general dicarboxylate transporter	--	putative glutamate/malate translocator [Oryza sativa Japonica Group] dbj|BAD10286.1| putative glutamate/malate translocator [Oryza sativa Japonica Group] gb|EAZ43108.1| hypothetical protein OsJ_27699 [Oryza sativa Japonica Group]	Phyllostachys edulis cDNA clone: bphyem209d23, full insert sequence	2-oxoglutarate/malate translocator, chloroplastic OS=Spinacia oleracea GN=SODIT1 PE=1 SV=1	Putative glutamate/malate translocator OS=Oryza sativa subsp. japonica GN=OSJNBb0092C08.31 PE=4 SV=1
Munro_Bamboo_unigene_BMK_27675; 1; Munro_Bamboo_unigene_BMK_56051; 1; bphylf051c20; 1	Tubulin	Cytoskeleton		Biological Process: microtubule-based movement (GO:0007018);; Biological Process: microtubule-based process (GO:0007017);	Biological Process: protein polymerization (GO:0051258);	Cellular Component: microtubule (GO:0005874);	Cellular Component: protein complex (GO:0043234);	Molecular Function: GTP binding (GO:0005525);	Molecular Function: structural molecule activity (GO:0005198);	IPR000217: Tubulin; IPR002453: Beta tubulin	IPR003008: Tubulin/FtsZ, GTPase domain	IPR017975: Tubulin, conserved site	hypothetical protein LOC100383576; K07375 tubulin beta	Cellular Processes; Transport and Catabolism; Phagosome [PATH:ko04145] Cellular Processes; Cell Motility; Cytoskeleton proteins [BR:ko04812] Cellular Processes; Cell Communication; Gap junction [PATH:ko04540] Human Diseases; Infectious Diseases; Pathogenic Escherichia coli infection [PATH:ko05130]	beta-tubulin R2242-rice [Arabidopsis lyrata subsp. lyrata] gb|EFH57615.1| beta-tubulin R2242-rice [Arabidopsis lyrata subsp. lyrata]	Phyllostachys edulis cDNA clone: bphylf051c20, full insert sequence	Tubulin beta-7 chain OS=Oryza sativa subsp. japonica GN=TUBB7 PE=2 SV=2	Os03g0780600 protein OS=Oryza sativa subsp. japonica GN=Os03g0780600 PE=2 SV=1
Munro_Bamboo_unigene_BMK_27707; 1; bphylf047k16; -1	--	--	--	--	hypothetical protein LOC100272998	--	unknown [Zea mays]	Phyllostachys edulis cDNA clone: bphylf047k16, full insert sequence	--	Putative uncharacterized protein OS=Zea mays PE=2 SV=1
Munro_Bamboo_unigene_BMK_27731; 1; bphyst035j13; 1	RNA polymerase II transcriptional regulation mediator	Transcription		--	--	Os06g0217500	--	hypothetical protein OsI_22170 [Oryza sativa Indica Group]	Phyllostachys edulis cDNA clone: bphyst035j13, full insert sequence	Putative mediator of RNA polymerase II transcription subunit 6 OS=Dictyostelium discoideum GN=med6 PE=3 SV=1	Os06g0217500 protein OS=Oryza sativa subsp. japonica GN=OSJNBb0024N18.27 PE=4 SV=1
Munro_Bamboo_unigene_BMK_27872; 1; bphyem003n12; 1	--	--	--	IPR008700: Pathogenic type III effector avirulence factor Avr cleavage site	umc2370; LOC100280613	--	NIP [Oryza minuta] gb|ACU64890.1| NIP [Oryza officinalis]	Phyllostachys edulis cDNA clone: bphyem003n12, full insert sequence	RPM1-interacting protein 4 OS=Arabidopsis thaliana GN=RIN4 PE=1 SV=1	NIP OS=Oryza officinalis GN=Ba0034L17.1 PE=4 SV=1
Munro_Bamboo_unigene_BMK_27913; 1; bphyem107b11; 1	--	--	Molecular Function: protein binding (GO:0005515);	IPR010399: Tify; IPR018467: CO/COL/TOC1, conserved site	Os04g0395800	--	hypothetical protein OsI_15710 [Oryza sativa Indica Group]	Phyllostachys edulis cDNA clone: bphyem107b11, full insert sequence	Protein TIFY 9 OS=Arabidopsis thaliana GN=TIFY9 PE=1 SV=1	OSJNBb0039F02.2 protein OS=Oryza sativa subsp. japonica GN=OSJNBb0039F02.2 PE=2 SV=1
Munro_Bamboo_unigene_BMK_27933; 1; bphylf061n06; -1	--	--	--	--	Os11g0198200	--	Os11g0198200 [Oryza sativa Japonica Group] dbj|BAF27796.2| Os11g0198200 [Oryza sativa Japonica Group]	Phyllostachys edulis cDNA clone: bphylf061n06, full insert sequence	--	Expressed protein OS=Oryza sativa subsp. japonica GN=LOC_Os11g09180 PE=4 SV=1
Munro_Bamboo_unigene_BMK_28; 1; bphyem205o13; -1	Glyceraldehyde-3-phosphate dehydrogenase/erythrose-4-phosphate dehydrogenase	Carbohydrate transport and metabolism		--	--	Os08g0126300; K00134 glyceraldehyde 3-phosphate dehydrogenase [EC:1.2.1.12]	Metabolism; Carbohydrate Metabolism; Glycolysis / Gluconeogenesis [PATH:ko00010] Human Diseases; Neurodegenerative Diseases; Alzheimer's disease [PATH:ko05010]	glyceraldehyde 3-phosphate dehydrogenase [Phyllostachys edulis]	Phyllostachys edulis cDNA clone: bphyem205o13, full insert sequence	Glyceraldehyde-3-phosphate dehydrogenase, cytosolic OS=Oryza sativa subsp. japonica GN=GAPC PE=1 SV=1	Glyceraldehyde 3-phosphate dehydrogenase OS=Phyllostachys edulis PE=2 SV=1
Munro_Bamboo_unigene_BMK_28020; 1; bphylf046k24; 1	--	--	--	--	Os01g0182200; K09875 aquaporin SIP	Environmental Information Processing; Signaling Molecules and Interaction; Ion channels [BR:ko04040]	Os01g0182200 [Oryza sativa Japonica Group] sp|Q5VR89.2|SIP11_ORYSJ RecName: Full=Aquaporin SIP1-1; AltName: Full=OsSIP1;1; AltName: Full=Small basic intrinsic protein 1-1 dbj|BAB32914.1| putative small basic membrane integral protein [Oryza sativa Japonica Group] dbj|BAF04130.1| Os01g0182200 [Oryza sativa Japonica Group] gb|EAZ10802.1| hypothetical protein OsJ_00637 [Oryza sativa Japonica Group] dbj|BAG97624.1| unnamed protein product [Oryza sativa Japonica Group] dbj|BAG98737.1| unnamed protein product [Oryza sativa Japonica Group]	Phyllostachys edulis cDNA clone: bphylf026i10, full insert sequence	Aquaporin SIP1-1 OS=Oryza sativa subsp. japonica GN=SIP1-1 PE=2 SV=2	cDNA clone:001-208-D07, full insert sequence OS=Oryza sativa subsp. japonica PE=2 SV=1
Munro_Bamboo_unigene_BMK_28083; 1; bphyem205e12; -1	Serine/threonine protein kinase	--		Biological Process: protein phosphorylation (GO:0006468);; Molecular Function: ATP binding (GO:0005524);	Molecular Function: protein kinase activity (GO:0004672);	Molecular Function: protein serine/threonine kinase activity (GO:0004674);	Molecular Function: protein tyrosine kinase activity (GO:0004713);	Molecular Function: transferase activity, transferring phosphorus-containing groups (GO:0016772);	IPR000719: Protein kinase, catalytic domain; IPR001245: Serine-threonine/tyrosine-protein kinase	IPR002290: Serine/threonine-protein kinase, catalytic  domain	IPR008271: Serine/threonine-protein kinase, active site	IPR011009: Protein kinase-like domain	IPR020635: Tyrosine-protein kinase, catalytic domain	Os03g0179400	--	Os03g0179400 [Oryza sativa Japonica Group] gb|ABF94292.1| serine/threonine-protein kinase NAK, putative, expressed [Oryza sativa Japonica Group] dbj|BAF11070.1| Os03g0179400 [Oryza sativa Japonica Group] dbj|BAG97926.1| unnamed protein product [Oryza sativa Japonica Group]	Phyllostachys edulis cDNA clone: bphyem205e12, full insert sequence	Serine/threonine-protein kinase At5g01020 OS=Arabidopsis thaliana GN=At5g01020 PE=1 SV=1	Os03g0179400 protein OS=Oryza sativa subsp. japonica GN=Os03g0179400 PE=2 SV=1
Munro_Bamboo_unigene_BMK_28106; 1; bphylf051c22; -1	Permeases of the major facilitator superfamily	--		--	--	hypothetical protein	--	hypothetical protein OsJ_37034 [Oryza sativa Japonica Group]	Phyllostachys edulis cDNA clone: bphylf051c22, full insert sequence	Sucrose transport protein SUT2 OS=Oryza sativa subsp. japonica GN=SUT2 PE=2 SV=2	Putative uncharacterized protein OS=Oryza sativa subsp. japonica GN=OsJ_37034 PE=4 SV=1
Munro_Bamboo_unigene_BMK_28255; 1; bphylf045m23; 1	--	--	--	IPR000782: FAS1 domain	Os04g0574200	--	Os04g0574200 [Oryza sativa Japonica Group] emb|CAD41669.3| OSJNBa0019K04.16 [Oryza sativa Japonica Group] dbj|BAF15531.1| Os04g0574200 [Oryza sativa Japonica Group] gb|EAY95238.1| hypothetical protein OsI_17056 [Oryza sativa Indica Group] gb|EAZ31705.1| hypothetical protein OsJ_15854 [Oryza sativa Japonica Group]	Phyllostachys edulis cDNA clone: bphylf045m23, full insert sequence	Fasciclin-like arabinogalactan protein 8 OS=Arabidopsis thaliana GN=FLA8 PE=1 SV=1	OSJNBa0019K04.16 protein OS=Oryza sativa subsp. japonica GN=OSJNBa0019K04.16 PE=4 SV=1
Munro_Bamboo_unigene_BMK_28273; 1; bphylf030i22; 1; bphyst016m09; 1; bphyst017g05; 1	Ribosomal protein S4 and related proteins	Translation, ribosomal structure and biogenesis		Cellular Component: intracellular (GO:0005622);; Molecular Function: rRNA binding (GO:0019843);	IPR001912: Ribosomal protein S4/S9, N-terminal; IPR022801: Ribosomal protein S4/S9	pco145462; LOC100192774; K02997 small subunit ribosomal protein S9e	Genetic Information Processing; Translation; Ribosome  Genetic Information Processing; Translation; Ribosome [BR:ko03011]	hypothetical protein SORBIDRAFT_02g040120 [Sorghum bicolor] gb|EER99750.1| hypothetical protein SORBIDRAFT_02g040120 [Sorghum bicolor]	Phyllostachys edulis cDNA clone: bphylf030i22, full insert sequence	40S ribosomal protein S9-2 OS=Arabidopsis thaliana GN=RPS9C PE=2 SV=1	Putative uncharacterized protein Sb02g040120 OS=Sorghum bicolor GN=Sb02g040120 PE=4 SV=1
Munro_Bamboo_unigene_BMK_28318; 1; bphylf037j21; 1	--	--	Cellular Component: integral to membrane (GO:0016021);	IPR004877: Cytochrome b561, eukaryote; IPR006593: Cytochrome b561/ferric reductase transmembrane	Os04g0533500; K08360 cytochrome b-561	Unclassified; Cellular Processes and Signaling; Electron transfer carriers	Os04g0533500 [Oryza sativa Japonica Group] emb|CAE04576.2| OSJNBb0039L24.15 [Oryza sativa Japonica Group] dbj|BAF15324.1| Os04g0533500 [Oryza sativa Japonica Group] emb|CAH67456.1| OSIGBa0159I10.1 [Oryza sativa Indica Group] dbj|BAG87918.1| unnamed protein product [Oryza sativa Japonica Group] dbj|BAG91320.1| unnamed protein product [Oryza sativa Japonica Group]	Phyllostachys edulis cDNA clone: bphylf037j21, full insert sequence	Cytochrome b561 OS=Mus musculus GN=Cyb561 PE=2 SV=2	OSJNBb0039L24.15 protein OS=Oryza sativa subsp. japonica GN=OSJNBb0039L24.15 PE=2 SV=2
Munro_Bamboo_unigene_BMK_28320; 1; bphylf044m09; 1	--	--	--	IPR010734: Copine	hypothetical protein LOC100501644	--	hypothetical protein LOC100501644 [Zea mays] gb|ACR34976.1| unknown [Zea mays] gb|ACR36204.1| unknown [Zea mays]	Phyllostachys edulis cDNA clone: bphylf044m09, full insert sequence	E3 ubiquitin-protein ligase RGLG1 OS=Arabidopsis thaliana GN=RGLG1 PE=1 SV=1	Putative uncharacterized protein OS=Zea mays PE=2 SV=1
Munro_Bamboo_unigene_BMK_28328; 1; bphylf059l15; 1	--	--	Molecular Function: binding (GO:0005488);; Molecular Function: protein binding (GO:0005515);	IPR001440: Tetratricopeptide TPR-1; IPR007052: CS-like domain	IPR007699: SGS	IPR008978: HSP20-like chaperone	IPR011990: Tetratricopeptide-like helical	IPR013026: Tetratricopeptide repeat-containing	IPR017447: CS domain	IPR019734: Tetratricopeptide repeat	hypothetical protein; K12795 suppressor of G2 allele of SKP1	Organismal Systems; Immune System; NOD-like receptor signaling pathway [PATH:ko04621] Organismal Systems; Environmental Adaptation; Plant-pathogen interaction [PATH:ko04626]	Sgt1 [Saccharum hybrid cultivar]	Phyllostachys edulis cDNA clone: bphylf059l15, full insert sequence	Protein SGT1 homolog OS=Oryza sativa subsp. japonica GN=SGT1 PE=1 SV=1	Sgt1 (Fragment) OS=Saccharum hybrid cultivar PE=2 SV=1
Munro_Bamboo_unigene_BMK_28373; 1; bphylf028o11; -1	Uridine kinase	Nucleotide transport and metabolism		--	--	Os02g0698000; K00855 phosphoribulokinase [EC:2.7.1.19]	Metabolism; Energy Metabolism; Carbon fixation in photosynthetic organisms [PATH:ko00710]	Os02g0698000 [Oryza sativa Japonica Group] gb|AAM94337.2| phosphoribulokinase precursor [Oryza sativa Indica Group] gb|AAN17353.1| phosphoribulokinase precursor [Oryza sativa Indica Group] dbj|BAD07865.1| phosphoribulokinase precursor [Oryza sativa Japonica Group] dbj|BAF09739.1| Os02g0698000 [Oryza sativa Japonica Group] gb|EAY87173.1| hypothetical protein OsI_08574 [Oryza sativa Indica Group] gb|EAZ24281.1| hypothetical protein OsJ_08032 [Oryza sativa Japonica Group] dbj|BAG96997.1| unnamed protein product [Oryza sativa Japonica Group]	Phyllostachys edulis cDNA clone: bphylf028o11, full insert sequence	Phosphoribulokinase, chloroplastic OS=Triticum aestivum PE=2 SV=1	Phosphoribulokinase OS=Oryza sativa subsp. indica GN=OsI_08574 PE=1 SV=1
Munro_Bamboo_unigene_BMK_28760; 1; Munro_Bamboo_unigene_BMK_58200; 1; bbasst002p14; 1	Ribosomal protein L31E	Translation, ribosomal structure and biogenesis		--	--	hypothetical protein; K02910 large subunit ribosomal protein L31e	Genetic Information Processing; Translation; Ribosome [PATH:ko03010] Genetic Information Processing; Translation; Ribosome [BR:ko03011]	hypothetical protein SORBIDRAFT_04g029810 [Sorghum bicolor] gb|EES05621.1| hypothetical protein SORBIDRAFT_04g029810 [Sorghum bicolor]	Phyllostachys edulis cDNA clone: bbasst002p14, full insert sequence	60S ribosomal protein L31 OS=Nicotiana glutinosa GN=RPL31 PE=2 SV=1	Putative uncharacterized protein Sb04g029810 OS=Sorghum bicolor GN=Sb04g029810 PE=4 SV=1
Munro_Bamboo_unigene_BMK_28818; 1; bphylf034g03; 1	Succinyl-CoA synthetase, alpha subunit	Energy production and conversion		--	--	hypothetical protein LOC100216609; K01899 succinyl-CoA synthetase alpha subunit [EC:6.2.1.4 6.2.1.5]	Metabolism; Carbohydrate Metabolism; Citrate cycle (TCA cycle) [PATH:ko00020] Metabolism; Carbohydrate Metabolism; Propanoate metabolism [PATH:ko00640]	RecName: Full=Probable succinyl-CoA ligase [ADP-forming] subunit alpha, mitochondrial; AltName: Full=Succinyl-CoA synthetase subunit alpha; Short=SCS-alpha; Flags: Precursor dbj|BAC83073.1| putative succinyl-CoA ligase alpha subunit [Oryza sativa Japonica Group] gb|EAZ40411.1| hypothetical protein OsJ_24862 [Oryza sativa Japonica Group] dbj|BAH01520.1| unnamed protein product [Oryza sativa Japonica Group]	Phyllostachys edulis cDNA clone: bphylf034g03, full insert sequence	Probable succinyl-CoA ligase [ADP-forming] subunit alpha, mitochondrial OS=Oryza sativa subsp. japonica GN=Os07g0577700 PE=1 SV=1	Putative uncharacterized protein OS=Zea mays PE=2 SV=1
Munro_Bamboo_unigene_BMK_28898; 1; bphyst016p06; 1	Diadenosine tetraphosphate (Ap4A) hydrolase and other HIT family hydrolases	--		--	--	hypothetical protein	--	hypothetical protein OsJ_03841 [Oryza sativa Japonica Group]	Phyllostachys edulis cDNA clone: bphyst016p06, full insert sequence	14 kDa zinc-binding protein OS=Zea mays GN=ZBP14 PE=1 SV=1	Putative uncharacterized protein OS=Oryza sativa subsp. japonica GN=OsJ_03841 PE=4 SV=1
Munro_Bamboo_unigene_BMK_29; 1; bphylf025c21; -1	Glyceraldehyde-3-phosphate dehydrogenase/erythrose-4-phosphate dehydrogenase	Carbohydrate transport and metabolism		Biological Process: glucose metabolic process (GO:0006006);; Biological Process: oxidation-reduction process (GO:0055114);	Molecular Function: NAD binding (GO:0051287);	Molecular Function: NADP binding (GO:0050661);	Molecular Function: nucleotide binding (GO:0000166);	Molecular Function: oxidoreductase activity, acting on the aldehyde or oxo group of donors, NAD or NADP as acceptor (GO:0016620);	IPR006424: Glyceraldehyde-3-phosphate dehydrogenase, type I; IPR016040: NAD(P)-binding domain	IPR020828: Glyceraldehyde 3-phosphate dehydrogenase, NAD(P) binding domain	IPR020829: Glyceraldehyde 3-phosphate dehydrogenase, catalytic domain	IPR020830: Glyceraldehyde 3-phosphate dehydrogenase, active site	IPR020831: Glyceraldehyde/Erythrose phosphate dehydrogenase family	Os04g0486600; K00134 glyceraldehyde 3-phosphate dehydrogenase [EC:1.2.1.12]	Metabolism; Carbohydrate Metabolism; Glycolysis / Gluconeogenesis [PATH:ko00010] Human Diseases; Neurodegenerative Diseases; Alzheimer's disease [PATH:ko05010]	Os04g0486600 [Oryza sativa Japonica Group] emb|CAE02009.2| OJ000223_09.15 [Oryza sativa Japonica Group] emb|CAD79700.2| H0302E05.3 [Oryza sativa Indica Group] dbj|BAF15053.1| Os04g0486600 [Oryza sativa Japonica Group] gb|ACA50493.1| glyceraldehyde-3-phosphate dehydrogenase [Oryza sativa Japonica Group] dbj|BAG89296.1| unnamed protein product [Oryza sativa Japonica Group] gb|ADM86862.1| glyceraldehyde-3-phosphate dehydrogenase [Oryza sativa Japonica Group]	Phyllostachys edulis cDNA clone: bphylf025c21, full insert sequence	Glyceraldehyde-3-phosphate dehydrogenase, cytosolic 3 OS=Zea mays GN=GAPC3 PE=2 SV=1	Glyceraldehyde-3-phosphate dehydrogenase OS=Oryza sativa subsp. japonica GN=OJ000223_09.15 PE=2 SV=1
Munro_Bamboo_unigene_BMK_29003; 1; Munro_Bamboo_unigene_BMK_50997; -1; bphylf028p05; 1	Serine/threonine protein kinase	--		Biological Process: protein phosphorylation (GO:0006468);; Molecular Function: ATP binding (GO:0005524);	Molecular Function: protein kinase activity (GO:0004672);	Molecular Function: transferase activity, transferring phosphorus-containing groups (GO:0016772);	IPR000719: Protein kinase, catalytic domain; IPR011009: Protein kinase-like domain	IPR017442: Serine/threonine-protein kinase-like domain	Os03g0128700	--	hypothetical protein OsJ_09266 [Oryza sativa Japonica Group]	Phyllostachys edulis cDNA clone: bphylf028p05, full insert sequence	Calcium-dependent protein kinase isoform 11 OS=Oryza sativa subsp. japonica GN=CPK11 PE=2 SV=2	Calcium-dependent protein kinase, isoform 11, putative, expressed OS=Oryza sativa subsp. japonica GN=LOC_Os03g03660 PE=4 SV=1
Munro_Bamboo_unigene_BMK_2905; 1; bphylf045b18; 1	--	--	--	--	hypothetical protein	--	hypothetical protein SORBIDRAFT_04g032820 [Sorghum bicolor] gb|EES05780.1| hypothetical protein SORBIDRAFT_04g032820 [Sorghum bicolor]	Phyllostachys edulis cDNA clone: bphylf045b18, full insert sequence	Expansin-B11 OS=Oryza sativa subsp. japonica GN=EXPB11 PE=2 SV=1	Putative uncharacterized protein Sb04g032820 OS=Sorghum bicolor GN=Sb04g032820 PE=3 SV=1
Munro_Bamboo_unigene_BMK_29094; 1; bphyem204j11; -1	--	--	Biological Process: transport (GO:0006810);; Cellular Component: integral to membrane (GO:0016021);	IPR001251: Cellular retinaldehyde-binding/triple function, C-terminal; IPR009038: GOLD	hypothetical protein	--	hypothetical protein SORBIDRAFT_09g021240 [Sorghum bicolor] gb|EES19577.1| hypothetical protein SORBIDRAFT_09g021240 [Sorghum bicolor]	Phyllostachys edulis cDNA clone: bphyem204j11, full insert sequence	Patellin-5 OS=Arabidopsis thaliana GN=PATL5 PE=1 SV=2	Putative uncharacterized protein Sb09g021240 OS=Sorghum bicolor GN=Sb09g021240 PE=4 SV=1
Munro_Bamboo_unigene_BMK_29192; 1; bbasst002c17; -1	Predicted O-methyltransferase	General function prediction only		--	--	Os06g0165800; K00588 caffeoyl-CoA O-methyltransferase [EC:2.1.1.104]	Metabolism; Amino Acid Metabolism; Phenylalanine metabolism [PATH:ko00360] Metabolism; Biosynthesis of Other Secondary Metabolites; Phenylpropanoid biosynthesis [PATH:ko00940] Metabolism; Biosynthesis of Other Secondary Metabolites; Stilbenoid, diarylheptanoid and gingerol biosynthesis [PATH:ko00945] Metabolism; Biosynthesis of Other Secondary Metabolites; Flavonoid biosynthesis [PATH:ko00941]	caffeoyl-CoA O-methyltransferase [Bambusa oldhamii]	Phyllostachys edulis cDNA clone: bphylf027h24, full insert sequence	Caffeoyl-CoA O-methyltransferase 1 OS=Zea mays GN=CCOAOMT1 PE=2 SV=1	Caffeoyl-CoA O-methyltransferase OS=Bambusa oldhamii GN=CCoAOMT1 PE=2 SV=1
Munro_Bamboo_unigene_BMK_29225; 1; bphyem119n01; -1	--	--	--	--	Os10g0563400	--	Os10g0563400 [Oryza sativa Japonica Group] gb|AAG60196.1|AC084763_16 unknown protein [Oryza sativa Japonica Group] gb|AAP55035.1| expressed protein [Oryza sativa Japonica Group] dbj|BAF27238.1| Os10g0563400 [Oryza sativa Japonica Group] dbj|BAH00743.1| unnamed protein product [Oryza sativa Japonica Group] gb|EEC67451.1| hypothetical protein OsI_34667 [Oryza sativa Indica Group] gb|EEE51408.1| hypothetical protein OsJ_32478 [Oryza sativa Japonica Group]	Phyllostachys edulis cDNA clone: bphyem119n01, full insert sequence	--	Putative uncharacterized protein OSJNBa0027P10.2 OS=Oryza sativa GN=OSJNBa0027P10.2 PE=4 SV=1
Munro_Bamboo_unigene_BMK_2933; 1; bphylf050n20; 1	Integral membrane protein, interacts with FtsH	General function prediction only		--	IPR006214: Inhibitor of apoptosis-promoting Bax1-related	transmembrane BAX inhibitor motif-containing protein 4; K06890	Unclassified; Poorly Characterized; General function prediction only	transmembrane BAX inhibitor motif-containing protein 4 [Zea mays] gb|ACG36861.1| transmembrane BAX inhibitor motif-containing protein 4 [Zea mays] gb|ACR37792.1| unknown [Zea mays]	Phyllostachys edulis cDNA clone: bphylf050n20, full insert sequence	BI1-like protein OS=Arabidopsis thaliana GN=At4g15470 PE=2 SV=1	Transmembrane BAX inhibitor motif-containing protein 4 OS=Zea mays PE=2 SV=1
Munro_Bamboo_unigene_BMK_29368; 1; bphylf052b23; 1	Uncharacterized conserved protein	Function unknown		--	IPR014946: Protein of unknown function DUF1817	Os08g0167500	--	Os08g0167500 [Oryza sativa Japonica Group] dbj|BAC99541.1| putative ubiquinone oxidoreductase subunit 1 [Oryza sativa Japonica Group] dbj|BAF22993.1| Os08g0167500 [Oryza sativa Japonica Group] gb|EAZ05726.1| hypothetical protein OsI_27953 [Oryza sativa Indica Group] gb|EAZ41644.1| hypothetical protein OsJ_26178 [Oryza sativa Japonica Group] dbj|BAG87704.1| unnamed protein product [Oryza sativa Japonica Group]	Phyllostachys edulis cDNA clone: bphylf052b23, full insert sequence	--	Os08g0167500 protein OS=Oryza sativa subsp. japonica GN=P0462E11.7 PE=2 SV=1
Munro_Bamboo_unigene_BMK_2939; 1; bphylf058f05; -1	--	--	Biological Process: intracellular protein transport (GO:0006886);; Biological Process: vesicle-mediated transport (GO:0016192);	Cellular Component: clathrin adaptor complex (GO:0030131);	Cellular Component: clathrin coat of coated pit (GO:0030132);	Molecular Function: protein binding (GO:0005515);	IPR001392: Clathrin adaptor, mu subunit; IPR008968: Clathrin adaptor, mu subunit, C-terminal	IPR015629: Clathrin coat associated protein AP-50	hypothetical protein; K11826 AP-2 complex subunit mu-1	Cellular Processes; Transport and Catabolism; Endocytosis [PATH:ko04144] Human Diseases; Neurodegenerative Diseases; Huntington's disease [PATH:ko05016]	hypothetical protein SORBIDRAFT_04g031270 [Sorghum bicolor] gb|EES07425.1| hypothetical protein SORBIDRAFT_04g031270 [Sorghum bicolor]	Phyllostachys edulis cDNA clone: bphylf058f05, full insert sequence	AP-2 complex subunit mu OS=Dictyostelium discoideum GN=apm2 PE=2 SV=2	Putative uncharacterized protein Sb04g031270 OS=Sorghum bicolor GN=Sb04g031270 PE=4 SV=1
Munro_Bamboo_unigene_BMK_2950; 1; bphylf048p22; 1	--	--	--	--	Os11g0242800; K08916 light-harvesting complex II chlorophyll a/b binding protein 5	Metabolism; Energy Metabolism; Photosynthesis - antenna proteins [PATH:ko00196] Metabolism; Energy Metabolism; Photosynthesis proteins [BR:ko00194]	chloroplast chlorophyll a/b binding protein cab-PhE9 [Phyllostachys edulis]	Phyllostachys edulis cDNA clone: bphylf048p22, full insert sequence	Chlorophyll a-b binding protein CP26, chloroplastic OS=Arabidopsis thaliana GN=LHCB5 PE=2 SV=1	Chloroplast chlorophyll a/b binding protein cab-PhE9 OS=Phyllostachys edulis PE=2 SV=1
Munro_Bamboo_unigene_BMK_2954; 1; bphyst007f15; 1; bphyst013m22; 1	Glutathione S-transferase	Posttranslational modification, protein turnover, chaperones		Molecular Function: protein binding (GO:0005515);	IPR004045: Glutathione S-transferase, N-terminal; IPR004046: Glutathione S-transferase, C-terminal	IPR010987: Glutathione S-transferase, C-terminal-like	IPR012336: Thioredoxin-like fold	IPR017933: Glutathione S-transferase/chloride channel, C-terminal	Os03g0135100	--	Os03g0135100 [Oryza sativa Japonica Group] gb|AAN05497.1| Putative glutathione S-transferase [Oryza sativa Japonica Group] gb|AAS86423.1| glutathione S-transferase GSTF15 [Oryza sativa Japonica Group] gb|ABF93844.1| Glutathione S-transferase, C-terminal domain containing protein, expressed [Oryza sativa Japonica Group] dbj|BAF10798.1| Os03g0135100 [Oryza sativa Japonica Group] gb|EAZ25489.1| hypothetical protein OsJ_09311 [Oryza sativa Japonica Group] dbj|BAG87236.1| unnamed protein product [Oryza sativa Japonica Group]	Phyllostachys edulis cDNA clone: bphyst007f15, full insert sequence	Glutathione S-transferase 6, chloroplastic OS=Arabidopsis thaliana GN=GST6 PE=1 SV=3	Glutathione S-transferase GSTF15 OS=Oryza sativa subsp. japonica GN=OJ1006F06.7 PE=2 SV=1
Munro_Bamboo_unigene_BMK_29545; 1; bphylf024b18; 1	--	--	--	IPR005172: Tesmin/TSO1-like, CXC	Os12g0605500	--	hypothetical protein OsI_39028 [Oryza sativa Indica Group]	Phyllostachys edulis cDNA clone: bphylf024b18, full insert sequence	Protein lin-54 homolog OS=Drosophila melanogaster GN=mip120 PE=1 SV=1	Os12g0605500 protein OS=Oryza sativa subsp. japonica GN=Os12g0605500 PE=2 SV=1
Munro_Bamboo_unigene_BMK_29574; 1; bphylf055m13; -1	NTP pyrophosphohydrolases including oxidative damage repair enzymes	--		Molecular Function: RNA binding (GO:0003723);; Molecular Function: hydrolase activity (GO:0016787);	Molecular Function: manganese ion binding (GO:0030145);	IPR000086: NUDIX hydrolase domain; IPR007722: mRNA decapping protein 2, Box A	IPR015797: NUDIX hydrolase domain-like	IPR020084: NUDIX hydrolase, conserved site	Os02g0805900; K12613 mRNA-decapping enzyme subunit 2 [EC:3.-.-.-]	Genetic Information Processing; Folding, Sorting and Degradation; RNA degradation [PATH:ko03018]	hypothetical protein OsI_09350 [Oryza sativa Indica Group]	Phyllostachys edulis cDNA clone: bphylf055m13, full insert sequence	mRNA decapping complex subunit 2 OS=Schizosaccharomyces pombe GN=dcp2 PE=1 SV=1	Putative uncharacterized protein OS=Oryza sativa subsp. indica GN=OsI_09350 PE=4 SV=1
Munro_Bamboo_unigene_BMK_29577; 1; bphyem204d23; 1; bphyem205l03; 1	--	--	--	--	hypothetical protein	--	hypothetical protein SORBIDRAFT_01g005300 [Sorghum bicolor] gb|EER90744.1| hypothetical protein SORBIDRAFT_01g005300 [Sorghum bicolor]	Phyllostachys edulis cDNA clone: bphyem205l03, full insert sequence	Leucine-rich repeat extensin-like protein 6 OS=Arabidopsis thaliana GN=LRX6 PE=2 SV=1	Putative uncharacterized protein Sb01g005300 OS=Sorghum bicolor GN=Sb01g005300 PE=4 SV=1
Munro_Bamboo_unigene_BMK_2972; 1; bphyem102g18; 1	Ribosomal protein L19E	Translation, ribosomal structure and biogenesis		Biological Process: translation (GO:0006412);; Cellular Component: intracellular (GO:0005622);	Cellular Component: ribosome (GO:0005840);	Molecular Function: structural constituent of ribosome (GO:0003735);	IPR000196: Ribosomal protein L19/L19e; IPR015972: Ribosomal protein L19/L19e, domain 1	IPR015974: Ribosomal protein L19/L19e, domain 3	IPR023638: Ribosomal protein L19/L19e conserved site	Os03g0337800; K02885 large subunit ribosomal protein L19e	Genetic Information Processing; Translation; Ribosome [PATH:ko03010] Genetic Information Processing; Translation; Ribosome [BR:ko03011]	Os03g0337800 [Oryza sativa Japonica Group] gb|ABF95832.1| 60S ribosomal protein L19-1, putative, expressed [Oryza sativa Japonica Group] dbj|BAF11965.1| Os03g0337800 [Oryza sativa Japonica Group] gb|EAY89929.1| hypothetical protein OsI_11477 [Oryza sativa Indica Group] gb|EAZ26849.1| hypothetical protein OsJ_10765 [Oryza sativa Japonica Group] dbj|BAG95689.1| unnamed protein product [Oryza sativa Japonica Group] dbj|BAG86958.1| unnamed protein product [Oryza sativa Japonica Group]	Phyllostachys edulis cDNA clone: bphyem102g18, full insert sequence	60S ribosomal protein L19-1 OS=Arabidopsis thaliana GN=RPL19A PE=2 SV=1	60S ribosomal protein L19-1, putative, expressed OS=Oryza sativa subsp. japonica GN=Os03g0337800 PE=2 SV=1
Munro_Bamboo_unigene_BMK_2974; 1; bphylf025m08; 1	S-adenosylmethionine synthetase	Coenzyme transport and metabolism		--	--	hypothetical protein LOC100194360; K00789 S-adenosylmethionine synthetase [EC:2.5.1.6]	Metabolism; Amino Acid Metabolism; Cysteine and methionine metabolism [PATH:ko00270]	hypothetical protein LOC100194360 [Zea mays] gb|ACF81892.2| unknown [Zea mays]	Phyllostachys edulis cDNA clone: bpst40201k20, full insert sequence	S-adenosylmethionine synthase 1 OS=Triticum monococcum GN=SAMS1 PE=2 SV=1	S-adenosylmethionine synthase OS=Zea mays PE=2 SV=2
Munro_Bamboo_unigene_BMK_2975; 1; bphylf052h10; 1	S-adenosylmethionine synthetase	Coenzyme transport and metabolism		Biological Process: S-adenosylmethionine biosynthetic process (GO:0006556);; Molecular Function: ATP binding (GO:0005524);	Molecular Function: methionine adenosyltransferase activity (GO:0004478);	IPR002133: S-adenosylmethionine synthetase; IPR022628: S-adenosylmethionine synthetase, N-terminal	IPR022629: S-adenosylmethionine synthetase, central domain	IPR022630: S-adenosylmethionine synthetase, C-terminal	IPR022631: S-adenosylmethionine synthetase, conserved site	IPR022636: S-adenosylmethionine synthetase superfamily	Os05g0135700; K00789 S-adenosylmethionine synthetase [EC:2.5.1.6]	Metabolism; Amino Acid Metabolism; Cysteine and methionine metabolism [PATH:ko00270]	Os05g0135700 [Oryza sativa Japonica Group] sp|Q0DKY4.1|METK1_ORYSJ RecName: Full=S-adenosylmethionine synthase 1; Short=AdoMet synthase 1; AltName: Full=Methionine adenosyltransferase 1; Short=MAT 1 sp|A2Y053.2|METK1_ORYSI RecName: Full=S-adenosylmethionine synthase 1; Short=AdoMet synthase 1; AltName: Full=Methionine adenosyltransferase 1; Short=MAT 1 emb|CAA81481.1| S-adenosyl methionine synthetase [Oryza sativa] gb|AAT94053.1| S-adenosylmethionine synthetase [Oryza sativa Japonica Group] dbj|BAF16489.1| Os05g0135700 [Oryza sativa Japonica Group] dbj|BAG92801.1| unnamed protein product [Oryza sativa Japonica Group] dbj|BAG95925.1| unnamed protein product [Oryza sativa Japonica Group] dbj|BAG97007.1| unnamed protein product [Oryza sativa Japonica Group] gb|EEE62242.1| hypothetical protein OsJ_17029 [Oryza sativa Japonica Group]	Phyllostachys edulis cDNA clone: bphylf052h10, full insert sequence	S-adenosylmethionine synthase 1 OS=Oryza sativa subsp. japonica GN=SAM1 PE=2 SV=1	S-adenosylmethionine synthase OS=Oryza sativa subsp. japonica GN=OsJ_17029 PE=2 SV=1
Munro_Bamboo_unigene_BMK_29776; 1; bphylf028b14; 1	Predicted phosphatase/phosphohexomutase	General function prediction only		Biological Process: metabolic process (GO:0008152);; Molecular Function: catalytic activity (GO:0003824);	Molecular Function: hydrolase activity (GO:0016787);	IPR005834: Haloacid dehalogenase-like hydrolase; IPR006402: HAD-superfamily hydrolase, subfamily IA, variant 3	IPR023214: HAD-like domain	Os04g0557000	--	hypothetical protein OsI_16946 [Oryza sativa Indica Group]	Phyllostachys edulis cDNA clone: bphylf028b14, full insert sequence	Uncharacterized protein YhcW OS=Bacillus subtilis GN=yhcW PE=3 SV=1	OSJNBa0065O17.2 protein OS=Oryza sativa subsp. japonica GN=OSJNBb0012E24.15 PE=2 SV=2
Munro_Bamboo_unigene_BMK_29809; 1; bphylf030f10; -1; bphylf032l18; -1	--	--	--	--	hypothetical protein	--	hypothetical protein OsJ_32427 [Oryza sativa Japonica Group]	Phyllostachys edulis cDNA clone: bphylf030f10, full insert sequence	--	GATA zinc finger family protein, expressed OS=Oryza sativa subsp. japonica GN=OSJNBa0010C11.4 PE=4 SV=1
Munro_Bamboo_unigene_BMK_2990; 1; bphylf026h19; -1	--	--	--	IPR000782: FAS1 domain	Os09g0248100	--	Os09g0248100 [Oryza sativa Japonica Group] dbj|BAD19896.1| putative endosperm specific protein SC3 [Oryza sativa Japonica Group] dbj|BAD26000.1| putative endosperm specific protein SC3 [Oryza sativa Japonica Group] dbj|BAF24580.1| Os09g0248100 [Oryza sativa Japonica Group] gb|EAZ08273.1| hypothetical protein OsI_30524 [Oryza sativa Indica Group] gb|EAZ43889.1| hypothetical protein OsJ_28509 [Oryza sativa Japonica Group] dbj|BAG90947.1| unnamed protein product [Oryza sativa Japonica Group] dbj|BAG87887.1| unnamed protein product [Oryza sativa Japonica Group]	Phyllostachys edulis cDNA clone: bphylf026h19, full insert sequence	Fasciclin-like arabinogalactan protein 2 OS=Arabidopsis thaliana GN=FLA2 PE=1 SV=1	Os09g0248100 protein OS=Oryza sativa subsp. japonica GN=OJ1695_A02.4 PE=2 SV=1
Munro_Bamboo_unigene_BMK_2991; 1; bphyem113j07; 1; bphyem207i15; 1	Diadenosine tetraphosphatase and related serine/threonine protein phosphatases	Signal transduction mechanisms		Molecular Function: hydrolase activity (GO:0016787);	IPR004843: Metallophosphoesterase domain; IPR006186: Serine/threonine-specific protein phosphatase/bis(5-nucleosyl)-tetraphosphatase	hypothetical protein; K04382 protein phosphatase 2 (formerly 2A), catalytic subunit [EC:3.1.3.16]	Genetic Information Processing; Translation; mRNA surveillance pathway [PATH:ko03015] Genetic Information Processing; Replication and Repair; Chromosome [BR:ko03036] Environmental Information Processing; Signal Transduction; Wnt signaling pathway [PATH:ko04310] Environmental Information Processing; Signal Transduction; TGF-beta signaling pathway [PATH:ko04350] Cellular Processes; Cell Growth and Death; Cell cycle - yeast [PATH:ko04111] Cellular Processes; Cell Growth and Death; Meiosis - yeast [PATH:ko04113] Cellular Processes; Cell Growth and Death; Oocyte meiosis [PATH:ko04114] Cellular Processes; Cell Communication; Tight junction [PATH:ko04530] Organismal Systems; Nervous System; Long-term depression [PATH:ko04730] Human Diseases; Infectious Diseases; Hepatitis C [PATH:ko05160] Human Diseases; Infectious Diseases; Chagas disease (American trypanosomiasis) [PATH:ko05142]	hypothetical protein SORBIDRAFT_04g007570 [Sorghum bicolor] gb|EES06511.1| hypothetical protein SORBIDRAFT_04g007570 [Sorghum bicolor]	Phyllostachys edulis cDNA clone: bphyem207i15, full insert sequence	Serine/threonine-protein phosphatase PP2A-3 catalytic subunit OS=Oryza sativa subsp. japonica GN=PP2A3 PE=2 SV=1	Serine/threonine-protein phosphatase OS=Sorghum bicolor GN=Sb04g007570 PE=3 SV=1
Munro_Bamboo_unigene_BMK_29933; 1; bphyem002a03; -1; bphyem003l22; -1; bphyem003n08; -1; bphyst004o23; -1	--	--	Biological Process: response to stress (GO:0006950);	IPR003496: ABA/WDS induced protein	Asr protein	--	Asr protein [Zea mays] gb|ABW06772.1| Asr protein [Zea mays] gb|ACF86398.1| unknown [Zea mays] gb|ACR35962.1| unknown [Zea mays]	Phyllostachys edulis cDNA clone: bphyem003n08, full insert sequence	Abscisic stress-ripening protein 3 OS=Solanum lycopersicum GN=ASR3 PE=4 SV=2	Asr protein OS=Zea mays PE=4 SV=1
Munro_Bamboo_unigene_BMK_30051; 1; bphylf052f18; -1	--	--	--	--	Os03g0683800	--	anther-specific proline-rich protein APG precursor [Zea mays]	Phyllostachys edulis cDNA clone: bphylf052f18, full insert sequence	GDSL esterase/lipase At5g22810 OS=Arabidopsis thaliana GN=At5g22810 PE=2 SV=2	Putative proline-rich protein OS=Oryza sativa GN=OSJNBb0072E24.7 PE=4 SV=1
Munro_Bamboo_unigene_BMK_3015; 1; bphyem206k16; -1	--	--	Biological Process: GPI anchor biosynthetic process (GO:0006506);; Cellular Component: endoplasmic reticulum membrane (GO:0005789);	Cellular Component: integral to membrane (GO:0016021);	Molecular Function: transferase activity, transferring hexosyl groups (GO:0016758);	IPR007704: Mannosyltransferase, DXD	Os03g0670200; K05284 phosphatidylinositol glycan, class M [EC:2.4.1.-]	Metabolism; Glycan Biosynthesis and Metabolism; Glycosyltransferases [BR:ko01003] Metabolism; Glycan Biosynthesis and Metabolism; Glycosylphosphatidylinositol(GPI)-anchor biosynthesis [PATH:ko00563]	Os03g0670200 [Oryza sativa Japonica Group] gb|ABF98113.1| mannosyltransferase family protein, putative, expressed [Oryza sativa Japonica Group] dbj|BAF12783.1| Os03g0670200 [Oryza sativa Japonica Group] dbj|BAG91486.1| unnamed protein product [Oryza sativa Japonica Group]	Phyllostachys edulis cDNA clone: bphyem206k16, full insert sequence	GPI mannosyltransferase 1 OS=Arabidopsis thaliana GN=PIGM PE=2 SV=1	Mannosyltransferase (PIG-M) domain containing protein OS=Oryza sativa subsp. japonica GN=B1130H05.7 PE=4 SV=1
Munro_Bamboo_unigene_BMK_3023; 1; bphylf034c04; -1; bphyst019c22; -1	F0F1-type ATP synthase, subunit c/Archaeal/vacuolar-type H+-ATPase, subunit K	Energy production and conversion		Biological Process: ATP hydrolysis coupled proton transport (GO:0015991);; Cellular Component: proton-transporting V-type ATPase, V0 domain (GO:0033179);	Cellular Component: proton-transporting two-sector ATPase complex, proton-transporting domain (GO:0033177);	Molecular Function: hydrogen ion transmembrane transporter activity (GO:0015078);	IPR000245: ATPase, V0 complex, proteolipid subunit C; IPR002379: ATPase, F0/V0 complex, subunit C	pco086002; LOC100283904; K02155 V-type H+-transporting ATPase 16kDa proteolipid subunit [EC:3.6.3.14]	Metabolism; Energy Metabolism; Oxidative phosphorylation [PATH:ko00190] Cellular Processes; Transport and Catabolism; Phagosome [PATH:ko04145] Cellular Processes; Transport and Catabolism; Lysosome [PATH:ko04142] Organismal Systems; Excretory System; Collecting duct acid secretion [PATH:ko04966] Human Diseases; Immune System Diseases; Rheumatoid arthritis [PATH:ko05323] Human Diseases; Infectious Diseases; Vibrio cholerae infection [PATH:ko05110] Human Diseases; Infectious Diseases; Epithelial cell signaling in Helicobacter pylori infection [PATH:ko05120]	LOC100283904 [Zea mays] gb|ACF85712.1| unknown [Zea mays] gb|ACG33481.1| vacuolar ATP synthase 16 kDa proteolipid subunit [Zea mays] gb|ACG38468.1| vacuolar ATP synthase 16 kDa proteolipid subunit [Zea mays]	Phyllostachys edulis cDNA clone: bphyst019c22, full insert sequence	V-type proton ATPase 16 kDa proteolipid subunit OS=Avena sativa GN=VATP-P1 PE=2 SV=1	Os02g0550100 protein OS=Oryza sativa subsp. japonica GN=OSJNBa0040I22.27 PE=3 SV=1
Munro_Bamboo_unigene_BMK_30501; 1; bphyst039f10; -1	DNA-directed RNA polymerase, subunit K/omega	Transcription		Biological Process: transcription, DNA-dependent (GO:0006351);; Cellular Component: RNA polymerase complex (GO:0030880);	Molecular Function: DNA binding (GO:0003677);	Molecular Function: DNA-directed RNA polymerase activity (GO:0003899);	IPR006110: RNA polymerase, subunit omega/K/RPABC2; IPR006111: DNA-directed RNA polymerase, subunit K/RPABC2	IPR012293: RNA polymerase subunit, RPB6/omega	IPR020708: DNA-directed RNA polymerase, 14-18kDa subunit, conserved site	Os03g0586600; K03014 DNA-directed RNA polymerases I, II, and III subunit RPABC2	Metabolism; Nucleotide Metabolism; Purine metabolism [PATH:ko00230] Metabolism; Nucleotide Metabolism; Pyrimidine metabolism [PATH:ko00240] Genetic Information Processing; Transcription; RNA polymerase [PATH:ko03020] Genetic Information Processing; Replication and Repair; DNA repair and recombination proteins [BR:ko03400] Organismal Systems; Immune System; Cytosolic DNA-sensing pathway [PATH:ko04623] Human Diseases; Neurodegenerative Diseases; Huntington's disease [PATH:ko05016]	hypothetical protein OsI_12404 [Oryza sativa Indica Group]	Phyllostachys edulis cDNA clone: bphyst039f10, full insert sequence	DNA-directed RNA polymerases I, II, and III subunit RPABC2 OS=Rattus norvegicus GN=Polr2f PE=1 SV=1	Putative uncharacterized protein OS=Oryza sativa subsp. indica GN=OsI_12404 PE=3 SV=1
Munro_Bamboo_unigene_BMK_30523; 1; bphyst005o24; 1	Ribosomal protein S17	Translation, ribosomal structure and biogenesis		Biological Process: translation (GO:0006412);; Cellular Component: intracellular (GO:0005622);	Cellular Component: ribosome (GO:0005840);	Molecular Function: structural constituent of ribosome (GO:0003735);	IPR000266: Ribosomal protein S17; IPR012340: Nucleic acid-binding, OB-fold	IPR016027: Nucleic acid-binding, OB-fold-like	Os04g0502300; K02949 small subunit ribosomal protein S11e	Genetic Information Processing; Translation; Ribosome  Genetic Information Processing; Translation; Ribosome [BR:ko03011]	Os04g0502300 [Oryza sativa Japonica Group] dbj|BAF15149.1| Os04g0502300 [Oryza sativa Japonica Group] emb|CAH67584.1| OSIGBa0112M24.1 [Oryza sativa Indica Group]	Phyllostachys edulis cDNA clone: bphyst005o24, full insert sequence	40S ribosomal protein S11 OS=Zea mays GN=RPS11 PE=2 SV=1	Os04g0502300 protein OS=Oryza sativa subsp. japonica GN=Os04g0502300 PE=3 SV=1
Munro_Bamboo_unigene_BMK_30529; 1; bphylf028a16; 1	Methionine aminopeptidase	Translation, ribosomal structure and biogenesis		Biological Process: cellular process (GO:0009987);; Biological Process: proteolysis (GO:0006508);	Molecular Function: aminopeptidase activity (GO:0004177);	Molecular Function: metalloexopeptidase activity (GO:0008235);	IPR000994: Peptidase M24, structural domain; IPR001714: Peptidase M24, methionine aminopeptidase	IPR004545: Proliferation-associated protein 1	IPR011991: Winged helix-turn-helix transcription repressor DNA-binding	proliferation-associated protein 2G4	--	proliferation-associated protein 2G4 [Zea mays] gb|ACG34597.1| proliferation-associated protein 2G4 [Zea mays] gb|ACR36319.1| unknown [Zea mays]	Phyllostachys edulis cDNA clone: bphylf028a16, full insert sequence	Proliferation-associated protein 2G4 OS=Mus musculus GN=Pa2g4 PE=1 SV=3	Proliferation-associated protein 2G4 OS=Zea mays PE=2 SV=1
Munro_Bamboo_unigene_BMK_30635; 1; bphyst007j17; -1	Preprotein translocase subunit Sss1	Intracellular trafficking, secretion, and vesicular transport		--	--	Os02g0178400; K07342 protein transport protein SEC61 subunit gamma and related proteins	Genetic Information Processing; Folding, Sorting and Degradation; Protein export  Genetic Information Processing; Folding, Sorting and Degradation; Protein processing in endoplasmic reticulum  Environmental Information Processing; Membrane Transport; Secretion system [BR:ko02044] Cellular Processes; Transport and Catabolism; Phagosome  Human Diseases; Infectious Diseases; Vibrio cholerae infection	Os02g0178400 [Oryza sativa Japonica Group] sp|P38385.1|SC61G_ORYSJ RecName: Full=Protein transport protein Sec61 subunit gamma dbj|BAD27997.1| transport protein SEC61 [Oryza sativa Japonica Group] dbj|BAF07990.1| Os02g0178400 [Oryza sativa Japonica Group] gb|EAY84716.1| hypothetical protein OsI_06084 [Oryza sativa Indica Group] gb|EAZ21956.1| hypothetical protein OsJ_05608 [Oryza sativa Japonica Group] gb|ABR26051.1| protein transport protein sec61 gamma subunit [Oryza sativa Indica Group] dbj|BAG88874.1| unnamed protein product [Oryza sativa Japonica Group] dbj|BAH00530.1| unnamed protein product [Oryza sativa Japonica Group]	Phyllostachys edulis cDNA clone: bphyst007j17, full insert sequence	Protein transport protein Sec61 subunit gamma OS=Oryza sativa subsp. japonica GN=Os02g0178400 PE=3 SV=1	Os02g0178400 protein OS=Oryza sativa subsp. japonica GN=Os02g0178400 PE=4 SV=1
Munro_Bamboo_unigene_BMK_3078; 1; bphyst039d16; 1	--	--	--	--	Os05g0593100; K02148 V-type H+-transporting ATPase subunit C [EC:3.6.3.14]	Metabolism; Energy Metabolism; Oxidative phosphorylation [PATH:ko00190] Cellular Processes; Transport and Catabolism; Phagosome [PATH:ko04145] Organismal Systems; Excretory System; Collecting duct acid secretion [PATH:ko04966] Human Diseases; Immune System Diseases; Rheumatoid arthritis [PATH:ko05323] Human Diseases; Infectious Diseases; Vibrio cholerae infection [PATH:ko05110] Human Diseases; Infectious Diseases; Epithelial cell signaling in Helicobacter pylori infection [PATH:ko05120]	Os05g0593100 [Oryza sativa Japonica Group] gb|AAT44305.1| putative vacuolar ATP synthase subunit C [Oryza sativa Japonica Group] dbj|BAF18414.1| Os05g0593100 [Oryza sativa Japonica Group] dbj|BAG88149.1| unnamed protein product [Oryza sativa Japonica Group] dbj|BAG94456.1| unnamed protein product [Oryza sativa Japonica Group] gb|EEC79794.1| hypothetical protein OsI_21221 [Oryza sativa Indica Group] gb|EEE64903.1| hypothetical protein OsJ_19763 [Oryza sativa Japonica Group]	Phyllostachys edulis cDNA clone: bphyst039d16, full insert sequence	V-type proton ATPase subunit C OS=Hordeum vulgare GN=VATC PE=1 SV=1	Os05g0593100 protein OS=Oryza sativa subsp. japonica GN=P0663C08.13 PE=2 SV=1
Munro_Bamboo_unigene_BMK_30783; 1; bphyst026o17; 1	--	--	--	--	Os03g0174200	--	hypothetical protein OsI_10217 [Oryza sativa Indica Group]	Phyllostachys edulis cDNA clone: bphyst026o17, full insert sequence	--	Expressed protein OS=Oryza sativa subsp. japonica GN=Os03g0174200 PE=2 SV=1
Munro_Bamboo_unigene_BMK_30814; 1; bphyem123j01; -1	--	--	Molecular Function: nucleic acid binding (GO:0003676);; Molecular Function: nucleotide binding (GO:0000166);	IPR000504: RNA recognition motif domain; IPR001395: Aldo/keto reductase	IPR012677: Nucleotide-binding, alpha-beta plait	Os04g0594400	--	Os04g0594400 [Oryza sativa Japonica Group] emb|CAE04149.1| OSJNBa0009P12.34 [Oryza sativa Japonica Group] emb|CAD41559.3| OSJNBa0006A01.14 [Oryza sativa Japonica Group] dbj|BAF15641.1| Os04g0594400 [Oryza sativa Japonica Group] emb|CAH67985.1| OSIGBa0142I02-OSIGBa0101B20.28 [Oryza sativa Indica Group] gb|EAY95383.1| hypothetical protein OsI_17216 [Oryza sativa Indica Group] gb|EAZ31837.1| hypothetical protein OsJ_15998 [Oryza sativa Japonica Group] dbj|BAG90232.1| unnamed protein product [Oryza sativa Japonica Group]	Phyllostachys edulis cDNA clone: bphyem123j01, full insert sequence	Protein vip1 OS=Schizosaccharomyces pombe GN=vip1 PE=1 SV=1	OSIGBa0142I02-OSIGBa0101B20.28 protein OS=Oryza sativa GN=OSJNBa0006A01.14 PE=4 SV=3
Munro_Bamboo_unigene_BMK_30816; 1; bphylf029d10; 1	--	--	--	--	hypothetical protein	--	hypothetical protein SORBIDRAFT_01g012570 [Sorghum bicolor] gb|EER91113.1| hypothetical protein SORBIDRAFT_01g012570 [Sorghum bicolor]	Phyllostachys edulis cDNA clone: bphylf029d10, full insert sequence	--	Putative uncharacterized protein Sb01g012570 OS=Sorghum bicolor GN=Sb01g012570 PE=4 SV=1
Munro_Bamboo_unigene_BMK_30848; 1; bphyst008b15; 1; bphyst009b09; 1	--	--	--	--	Os10g0546400	--	hypothetical protein OsI_34546 [Oryza sativa Indica Group] gb|EEE51347.1| hypothetical protein OsJ_32353 [Oryza sativa Japonica Group]	Phyllostachys edulis cDNA clone: bphyst008b15, full insert sequence	--	Expressed protein OS=Oryza sativa subsp. japonica GN=OSJNBa0001O14.8 PE=2 SV=1
Munro_Bamboo_unigene_BMK_3087; 1; bphylf039n17; 1; bphylf056h18; 1	Peptide methionine sulfoxide reductase	Posttranslational modification, protein turnover, chaperones		Biological Process: oxidation-reduction process (GO:0055114);; Biological Process: protein metabolic process (GO:0019538);	Molecular Function: oxidoreductase activity, acting on a sulfur group of donors, disulfide as acceptor (GO:0016671);	IPR002569: Peptide methionine sulphoxide reductase MsrA	Os04g0482000; K07304 peptide-methionine (S)-S-oxide reductase [EC:1.8.4.11]	Unclassified; Genetic Information Processing; Protein folding and associated processing	Os04g0482000 [Oryza sativa Japonica Group] sp|Q7XUP7.2|MSR21_ORYSJ RecName: Full=Peptide methionine sulfoxide reductase A2-1; Short=OsMSRA2.1; AltName: Full=Peptide-methionine (S)-S-oxide reductase; Short=Peptide Met(O) reductase; AltName: Full=Protein-methionine-S-oxide reductase emb|CAD41099.2| OSJNBb0011N17.16 [Oryza sativa Japonica Group] dbj|BAF15030.1| Os04g0482000 [Oryza sativa Japonica Group] gb|EAY94575.1| hypothetical protein OsI_16352 [Oryza sativa Indica Group] gb|EAZ31123.1| hypothetical protein OsJ_15220 [Oryza sativa Japonica Group] dbj|BAG89211.1| unnamed protein product [Oryza sativa Japonica Group]	Phyllostachys edulis cDNA clone: bphylf039n17, full insert sequence	Peptide methionine sulfoxide reductase A2-1 OS=Oryza sativa subsp. japonica GN=MSRA2-1 PE=2 SV=2	Putative uncharacterized protein OS=Oryza sativa subsp. indica GN=OsI_16352 PE=3 SV=1
Munro_Bamboo_unigene_BMK_3099; 1; bphylf042f07; 1; bphylf059d07; 1	Translation initiation factor 2 (IF-2; GTPase)	Translation, ribosomal structure and biogenesis		Molecular Function: chaperone binding (GO:0051087);; Molecular Function: protein binding (GO:0005515);	IPR000626: Ubiquitin; IPR003103: BAG domain	IPR019955: Ubiquitin supergroup	protein binding protein	--	protein binding protein [Zea mays]	Phyllostachys edulis cDNA clone: bphylf059d07, full insert sequence	Eukaryotic translation initiation factor 3 subunit A OS=Culex quinquefasciatus GN=eIF3-S10 PE=3 SV=2	Protein binding protein OS=Zea mays PE=2 SV=1
Munro_Bamboo_unigene_BMK_31087; 1; bphyem107b06; -1	--	--	--	--	Os04g0517100; K09422 myb proto-oncogene protein, plant	Genetic Information Processing; Transcription; Transcription factors [BR:ko03000]	hypothetical protein OsI_16650 [Oryza sativa Indica Group]	Phyllostachys edulis cDNA clone: bphyem107b06, full insert sequence	Myb-related protein Myb4 OS=Oryza sativa subsp. japonica GN=MYB4 PE=2 SV=2	Os04g0517100 protein OS=Oryza sativa subsp. japonica GN=Os04g0517100 PE=4 SV=1
Munro_Bamboo_unigene_BMK_3111; 1; bphylf333z14; -1	2-polyprenylphenol hydroxylase and related flavodoxin oxidoreductases	--		Biological Process: oxidation-reduction process (GO:0055114);; Molecular Function: oxidoreductase activity (GO:0016491);	IPR001433: Oxidoreductase FAD/NAD(P)-binding; IPR001834: NADH:cytochrome b5 reductase (CBR)	IPR008333: Oxidoreductase, FAD-binding domain	IPR017927: Ferredoxin reductase-type FAD-binding domain	IPR017938: Riboflavin synthase-like beta-barrel	Os01g0174300; K00326 cytochrome-b5 reductase [EC:1.6.2.2]	Metabolism; Carbohydrate Metabolism; Amino sugar and nucleotide sugar metabolism [PATH:ko00520]	Os01g0174300 [Oryza sativa Japonica Group] dbj|BAD68119.1| putative cytochrome b5 reductase [Oryza sativa Japonica Group] dbj|BAF04077.1| Os01g0174300 [Oryza sativa Japonica Group] gb|EEE53961.1| hypothetical protein OsJ_00570 [Oryza sativa Japonica Group]	Phyllostachys edulis cDNA clone: bphylf333z14, full insert sequence	NADH-cytochrome b5 reductase-like protein OS=Arabidopsis thaliana GN=At5g20080 PE=1 SV=2	Os01g0174300 protein OS=Oryza sativa subsp. japonica GN=OSJNBa0089K24.21 PE=4 SV=1
Munro_Bamboo_unigene_BMK_3119; 1; bphylf057l23; -1; bphylf058e01; -1; bphylf060b08; -1	--	--	--	--	chlorophyll A/B binding protein, putative; K08909 light-harvesting complex I chlorophyll a/b binding protein 3	Metabolism; Energy Metabolism; Photosynthesis - antenna proteins [PATH:ko00196] Metabolism; Energy Metabolism; Photosynthesis proteins [BR:ko00194]	putative chlorophyll a/b-binding protein type III precursor [Oryza sativa Japonica Group] dbj|BAD25451.1| putative chlorophyll a/b-binding protein type III precursor [Oryza sativa Japonica Group] gb|EAY84878.1| hypothetical protein OsI_06243 [Oryza sativa Indica Group] gb|EAZ22099.1| hypothetical protein OsJ_05758 [Oryza sativa Japonica Group] dbj|BAG96410.1| unnamed protein product [Oryza sativa Japonica Group] dbj|BAG96511.1| unnamed protein product [Oryza sativa Japonica Group] dbj|BAG87647.1| unnamed protein product [Oryza sativa Japonica Group] dbj|BAG96612.1| unnamed protein product [Oryza sativa Japonica Group] dbj|BAG96635.1| unnamed protein product [Oryza sativa Japonica Group] dbj|BAG96642.1| unnamed protein product [Oryza sativa Japonica Group] dbj|BAG96690.1| unnamed protein product [Oryza sativa Japonica Group] dbj|BAG96700.1| unnamed protein product [Oryza sativa Japonica Group] dbj|BAG96710.1| unnamed protein product [Oryza sativa Japonica Group] dbj|BAG96751.1| unnamed protein product [Oryza sativa Japonica Group] dbj|BAG96764.1| unnamed protein product [Oryza sativa Japonica Group] dbj|BAG96783.1| unnamed protein product [Oryza sativa Japonica Group] dbj|BAG96859.1| unnamed protein product [Oryza sativa Japonica Group] dbj|BAG96915.1| unnamed protein product [Oryza sativa Japonica Group] dbj|BAG87343.1| unnamed protein product [Oryza sativa Japonica Group] dbj|BAG99690.1| unnamed protein product [Oryza sativa Japonica Group]	Phyllostachys edulis cDNA clone: bphylf060b08, full insert sequence	Chlorophyll a-b binding protein 8, chloroplastic OS=Solanum lycopersicum GN=CAB8 PE=3 SV=1	Putative chlorophyll a/b-binding protein type III OS=Oryza sativa subsp. japonica GN=P0026H03.3-1 PE=2 SV=1
Munro_Bamboo_unigene_BMK_3123; 1; bphyst023f24; -1	--	--	--	--	pco070877; LOC100283816; K02721 photosystem II PsbW protein	Metabolism; Energy Metabolism; Photosynthesis [PATH:ko00195] Metabolism; Energy Metabolism; Photosynthesis proteins [BR:ko00194]	photosystem II reaction center W protein [Zea mays]	Phyllostachys edulis cDNA clone: bphyst023f24, full insert sequence	Photosystem II reaction center W protein, chloroplastic OS=Oryza sativa subsp. japonica GN=PSBW PE=2 SV=1	Photosystem II reaction center W protein OS=Zea mays PE=2 SV=1
Munro_Bamboo_unigene_BMK_3128; 1; bphylf045l21; -1	Predicted oxidoreductases (related to aryl-alcohol dehydrogenases)	Energy production and conversion		Biological Process: potassium ion transport (GO:0006813);; Biological Process: transmembrane transport (GO:0055085);	IPR001395: Aldo/keto reductase; IPR005399: Potassium channel, voltage-dependent, beta subunit, KCNAB-related	IPR023210: NADP-dependent oxidoreductase domain	Os02g0817500	--	Os02g0817500 [Oryza sativa Japonica Group] sp|Q40648.2|KCAB_ORYSJ RecName: Full=Probable voltage-gated potassium channel subunit beta; AltName: Full=K(+) channel subunit beta dbj|BAD21522.1| putative potassium channel beta subunit [Oryza sativa Japonica Group] dbj|BAD22023.1| putative potassium channel beta subunit [Oryza sativa Japonica Group] dbj|BAF10435.1| Os02g0817500 [Oryza sativa Japonica Group] dbj|BAG96444.1| unnamed protein product [Oryza sativa Japonica Group] dbj|BAG93107.1| unnamed protein product [Oryza sativa Japonica Group] gb|EEC74246.1| hypothetical protein OsI_09450 [Oryza sativa Indica Group] gb|EEE58046.1| hypothetical protein OsJ_08879 [Oryza sativa Japonica Group]	Phyllostachys edulis cDNA clone: bphylf045l21, full insert sequence	Probable voltage-gated potassium channel subunit beta OS=Oryza sativa subsp. japonica GN=KOB1 PE=1 SV=2	Os02g0817500 protein OS=Oryza sativa subsp. japonica GN=Os02g0817500 PE=2 SV=1
Munro_Bamboo_unigene_BMK_31311; 1; bphyem001d15; 1; bphyem002f19; 1	--	--	--	--	Os01g0642200	--	Os01g0642200 [Oryza sativa Japonica Group] dbj|BAD68744.1| unknown protein [Oryza sativa Japonica Group] dbj|BAD68857.1| unknown protein [Oryza sativa Japonica Group] dbj|BAF05603.1| Os01g0642200 [Oryza sativa Japonica Group] dbj|BAG92538.1| unnamed protein product [Oryza sativa Japonica Group] dbj|BAG97124.1| unnamed protein product [Oryza sativa Japonica Group] gb|EEC71167.1| hypothetical protein OsI_03032 [Oryza sativa Indica Group] gb|EEE55069.1| hypothetical protein OsJ_02789 [Oryza sativa Japonica Group]	Phyllostachys edulis cDNA clone: bphyst011i04, full insert sequence	--	Os01g0642200 protein OS=Oryza sativa subsp. japonica GN=P0039G05.26 PE=4 SV=1
Munro_Bamboo_unigene_BMK_31353; 1; bphylf060b07; 1	--	--	--	--	hypothetical protein	--	unknown protein [Oryza sativa Japonica Group]	Phyllostachys edulis cDNA clone: bphylf060b07, full insert sequence	--	Putative uncharacterized protein P0592C05.16 OS=Oryza sativa subsp. japonica GN=P0592C05.16 PE=4 SV=1
Munro_Bamboo_unigene_BMK_31448; 1; bphylf046j20; 1	--	--	--	--	hypothetical protein	--	hypothetical protein OsJ_16693 [Oryza sativa Japonica Group]	Phyllostachys edulis cDNA clone: bphylf046j20, full insert sequence	Vegetative cell wall protein gp1 OS=Chlamydomonas reinhardtii GN=GP1 PE=2 SV=1	H0913C04.10 protein OS=Oryza sativa GN=H0913C04.10 PE=3 SV=1
Munro_Bamboo_unigene_BMK_31592; 1; bphyem204b15; -1	--	--	--	--	Os07g0540200	--	hypothetical protein OsI_26353 [Oryza sativa Indica Group]	Phyllostachys edulis cDNA clone: bphyem204b15, full insert sequence	Uncharacterized 29.3 kDa protein OS=Orgyia pseudotsugata multicapsid polyhedrosis virus GN=ORF92 PE=4 SV=1	Os07g0540200 protein OS=Oryza sativa subsp. japonica GN=P0458H05.113 PE=2 SV=1
Munro_Bamboo_unigene_BMK_31633; 1; bphylf035h05; 1	--	--	--	--	hypothetical protein LOC100502148	--	hypothetical protein LOC100502148 [Zea mays] gb|ACR37570.1| unknown [Zea mays]	Phyllostachys edulis cDNA clone: bphylf035h05, full insert sequence	--	Putative uncharacterized protein OS=Zea mays PE=2 SV=1
Munro_Bamboo_unigene_BMK_31634; 1; bphyst004g17; 1	Mitochondrial sulfhydryl oxidase involved in the biogenesis of cytosolic Fe/S proteins	Posttranslational modification, protein turnover, chaperones		Biological Process: oxidation-reduction process (GO:0055114);; Molecular Function: thiol oxidase activity (GO:0016972);	IPR006863: Erv1/Alr; IPR017905: ERV/ALR sulphydryl oxidase	augmenter of liver regeneration	--	hypothetical protein OsI_10452 [Oryza sativa Indica Group] gb|EEE58546.1| hypothetical protein OsJ_09843 [Oryza sativa Japonica Group]	Phyllostachys edulis cDNA clone: bphyst004g17, full insert sequence	FAD-linked sulfhydryl oxidase ERV1 OS=Arabidopsis thaliana GN=ERV1 PE=1 SV=1	Putative uncharacterized protein OS=Oryza sativa subsp. japonica GN=OsJ_09843 PE=4 SV=1
Munro_Bamboo_unigene_BMK_3167; 1; bphyst015i02; -1	Ribosomal protein S10	Translation, ribosomal structure and biogenesis		--	--	Os06g0134000	--	Os06g0134000 [Oryza sativa Japonica Group] sp|P35686.2|RS20_ORYSJ RecName: Full=40S ribosomal protein S20 pdb|3IZ6|J Chain J, Localization Of The Small Subunit Ribosomal Proteins Into A 5.5 A Cryo-Em Map Of Triticum Aestivum Translating 80s Ribosome dbj|BAD67888.1| 40S subunit ribosomal protein [Oryza sativa Japonica Group] dbj|BAD68866.1| 40S subunit ribosomal protein [Oryza sativa Japonica Group] dbj|BAF18627.1| Os06g0134000 [Oryza sativa Japonica Group] gb|EAY99540.1| hypothetical protein OsI_21509 [Oryza sativa Indica Group] gb|EAZ35731.1| hypothetical protein OsJ_20022 [Oryza sativa Japonica Group] dbj|BAG88241.1| unnamed protein product [Oryza sativa Japonica Group] dbj|BAG97806.1| unnamed protein product [Oryza sativa Japonica Group] dbj|BAG99964.1| unnamed protein product [Oryza sativa Japonica Group]	Phyllostachys edulis cDNA clone: bphyst015i02, full insert sequence	40S ribosomal protein S20 OS=Oryza sativa subsp. japonica GN=RPS20 PE=2 SV=2	Os06g0134000 protein OS=Oryza sativa subsp. japonica GN=Os06g0134000 PE=2 SV=1
Munro_Bamboo_unigene_BMK_31785; 1; bphylf049m08; 1	ATPases of the AAA+ class	Posttranslational modification, protein turnover, chaperones		Molecular Function: ATP binding (GO:0005524);; Molecular Function: nucleoside-triphosphatase activity (GO:0017111);	Molecular Function: nucleotide binding (GO:0000166);	IPR003593: ATPase, AAA+ type, core; IPR003959: ATPase, AAA-type, core	Os01g0757400	--	hypothetical protein OsJ_03507 [Oryza sativa Japonica Group]	Phyllostachys edulis cDNA clone: bphylf049m08, full insert sequence	Katanin p60 ATPase-containing subunit A-like 2 OS=Homo sapiens GN=KATNAL2 PE=2 SV=3	Katanin OS=Oryza sativa subsp. japonica GN=Os01g0757400 PE=2 SV=1
Munro_Bamboo_unigene_BMK_31809; 1; bphyst003l18; -1	Predicted transcription factor, homolog of eukaryotic MBF1	Transcription		Molecular Function: DNA binding (GO:0003677);; Molecular Function: sequence-specific DNA binding (GO:0043565);	IPR001387: Helix-turn-helix type 3; IPR010982: Lambda repressor-like, DNA-binding	IPR013729: Multiprotein bridging factor 1, N-terminal	Os08g0366100; K03627 putative transcription factor	Unclassified; Genetic Information Processing; Transcription related proteins	Os08g0366100 [Oryza sativa Japonica Group] dbj|BAD03357.1| putative ethylene-responsive transcriptional coactivator [Oryza sativa Japonica Group] dbj|BAF23561.1| Os08g0366100 [Oryza sativa Japonica Group] gb|EAZ06756.1| hypothetical protein OsI_29001 [Oryza sativa Indica Group] gb|EAZ06758.1| hypothetical protein OsI_29003 [Oryza sativa Indica Group] gb|EAZ42510.1| hypothetical protein OsJ_27077 [Oryza sativa Japonica Group] dbj|BAG88163.1| unnamed protein product [Oryza sativa Japonica Group] dbj|BAG99973.1| unnamed protein product [Oryza sativa Japonica Group]	Phyllostachys edulis cDNA clone: bphyst003l18, full insert sequence	Multiprotein-bridging factor 1a OS=Arabidopsis thaliana GN=MBF1A PE=2 SV=1	Os08g0366100 protein OS=Oryza sativa subsp. japonica GN=P0410E02.2 PE=2 SV=1
Munro_Bamboo_unigene_BMK_31825; 1; bphylf029a01; 1; bphyst037i14; 1	Peptidyl-prolyl cis-trans isomerase (rotamase) - cyclophilin family	Posttranslational modification, protein turnover, chaperones		--	--	Os09g0571400; K03767 peptidyl-prolyl cis-trans isomerase A (cyclophilin A) [EC:5.2.1.8]	Genetic Information Processing; Folding, Sorting and Degradation; Chaperones and folding catalysts [BR:ko03110]	Os09g0571400 [Oryza sativa Japonica Group] gb|AAA57044.1| cyclophilin 1 [Oryza sativa] dbj|BAD46607.1| peptidylprolyl isomerase [Oryza sativa Japonica Group] dbj|BAF25907.1| Os09g0571400 [Oryza sativa Japonica Group] gb|EAZ10159.1| hypothetical protein OsI_32475 [Oryza sativa Indica Group] gb|EAZ45747.1| hypothetical protein OsJ_30428 [Oryza sativa Japonica Group] dbj|BAG95895.1| unnamed protein product [Oryza sativa Japonica Group]	Phyllostachys edulis cDNA clone: bphyst037i14, full insert sequence	Peptidyl-prolyl cis-trans isomerase OS=Solanum lycopersicum GN=CYP PE=2 SV=1	Peptidyl-prolyl cis-trans isomerase OS=Oryza sativa subsp. japonica GN=B1331F11.9 PE=2 SV=1
Munro_Bamboo_unigene_BMK_3189; 1; bphyst003p17; 1	--	--	--	--	hypothetical protein; K11251 histone H2A	Genetic Information Processing; Replication and Repair; Chromosome [BR:ko03036] Human Diseases; Immune System Diseases; Systemic lupus erythematosus [PATH:ko05322]	hypothetical protein SORBIDRAFT_01g039240 [Sorghum bicolor] gb|EER92457.1| hypothetical protein SORBIDRAFT_01g039240 [Sorghum bicolor]	Phyllostachys edulis cDNA clone: bphyst003p17, full insert sequence	Histone H2A OS=Zea mays PE=2 SV=1	Histone H2A OS=Sorghum bicolor GN=Sb01g039240 PE=3 SV=1
Munro_Bamboo_unigene_BMK_3192; 1; bphylf026d14; -1	F0F1-type ATP synthase, gamma subunit	Energy production and conversion		--	--	csu309(atpc); LOC100284505; K02115 F-type H+-transporting ATPase subunit gamma [EC:3.6.3.14]	Metabolism; Energy Metabolism; Oxidative phosphorylation [PATH:ko00190] Metabolism; Energy Metabolism; Photosynthesis [PATH:ko00195] Metabolism; Energy Metabolism; Photosynthesis proteins [BR:ko00194]	ATP synthase subunit gamma, chloroplastic precursor [Zea mays] sp|P0C1M0.1|ATPG_MAIZE RecName: Full=ATP synthase subunit gamma, chloroplastic; AltName: Full=F-ATPase gamma subunit; Contains: RecName: Full=Inceptin; Flags: Precursor gb|ACG40717.1| ATP synthase gamma chain [Zea mays] gb|ACN25248.1| unknown [Zea mays]	Phyllostachys edulis cDNA clone: bphylf026d14, full insert sequence	ATP synthase subunit gamma, chloroplastic OS=Zea mays PE=1 SV=1	ATP synthase gamma chain OS=Zea mays PE=2 SV=1
Munro_Bamboo_unigene_BMK_31972; 1; bphyem201l03; 1	--	--	--	--	integral membrane protein like	--	hypothetical protein SORBIDRAFT_05g001870 [Sorghum bicolor] gb|EES09188.1| hypothetical protein SORBIDRAFT_05g001870 [Sorghum bicolor]	Phyllostachys edulis cDNA clone: bphyem201l03, full insert sequence	UDP-galactose transporter 2 OS=Arabidopsis thaliana GN=UDP-GALT2 PE=2 SV=1	Os12g0154600 protein OS=Oryza sativa subsp. japonica GN=Os12g0154600 PE=2 SV=1
Munro_Bamboo_unigene_BMK_3208; 1; bphylf044h09; 1	ATPase involved in DNA replication	Replication, recombination and repair		Biological Process: DNA replication (GO:0006260);; Cellular Component: nucleus (GO:0005634);	Molecular Function: ATP binding (GO:0005524);	Molecular Function: DNA binding (GO:0003677);	Molecular Function: nucleoside-triphosphatase activity (GO:0017111);	Molecular Function: nucleotide binding (GO:0000166);	IPR003593: ATPase, AAA+ type, core; IPR003959: ATPase, AAA-type, core	IPR008921: DNA polymerase III, clamp loader complex, gamma/delta/delta subunit, C-terminal	IPR019483: DNA polymerase III, clamp-loader complex, subunit E, C-terminal	Os03g0792600; K10756 replication factor C subunit 3/5	Genetic Information Processing; Replication and Repair; DNA replication [PATH:ko03030] Genetic Information Processing; Replication and Repair; DNA replication proteins [BR:ko03032] Genetic Information Processing; Replication and Repair; Chromosome [BR:ko03036] Genetic Information Processing; Replication and Repair; Nucleotide excision repair [PATH:ko03420] Genetic Information Processing; Replication and Repair; Mismatch repair [PATH:ko03430] Genetic Information Processing; Replication and Repair; DNA repair and recombination proteins [BR:ko03400]	Os03g0792600 [Oryza sativa Japonica Group] gb|AAO37979.1| putative replication factor [Oryza sativa Japonica Group] gb|ABF99302.1| Activator 1 38 kDa subunit, putative, expressed [Oryza sativa Japonica Group] dbj|BAF13439.1| Os03g0792600 [Oryza sativa Japonica Group] gb|EAY92145.1| hypothetical protein OsI_13856 [Oryza sativa Indica Group] dbj|BAG96243.1| unnamed protein product [Oryza sativa Japonica Group] dbj|BAG87033.1| unnamed protein product [Oryza sativa Japonica Group] gb|EEE60080.1| hypothetical protein OsJ_12910 [Oryza sativa Japonica Group]	Phyllostachys edulis cDNA clone: bphylf044h09, full insert sequence	Probable replication factor C subunit 3 OS=Dictyostelium discoideum GN=rfc3 PE=3 SV=1	Activator 1 38 kDa subunit, putative, expressed OS=Oryza sativa subsp. japonica GN=OSJNBb0060J21.20 PE=2 SV=1
Munro_Bamboo_unigene_BMK_32102; 1; bphyem211j15; 1	--	--	--	--	hypothetical protein; K13065 shikimate O-hydroxycinnamoyltransferase [EC:2.3.1.133]	Metabolism; Biosynthesis of Other Secondary Metabolites; Phenylpropanoid biosynthesis [PATH:ko00940] Metabolism; Biosynthesis of Other Secondary Metabolites; Stilbenoid, diarylheptanoid and gingerol biosynthesis [PATH:ko00945] Metabolism; Biosynthesis of Other Secondary Metabolites; Flavonoid biosynthesis [PATH:ko00941]	hypothetical protein SORBIDRAFT_06g021640 [Sorghum bicolor] gb|EES11073.1| hypothetical protein SORBIDRAFT_06g021640 [Sorghum bicolor]	Phyllostachys edulis cDNA clone: bphyem211j15, full insert sequence	Anthranilate N-benzoyltransferase protein 1 OS=Dianthus caryophyllus GN=HCBT1 PE=1 SV=1	Putative uncharacterized protein Sb06g021640 OS=Sorghum bicolor GN=Sb06g021640 PE=4 SV=1
Munro_Bamboo_unigene_BMK_32131; 1; bphyem104g18; -1; bphyem125c19; -1; bphylf036b13; -1; bphylf044a02; -1; bphylfb56g21; -1; bphyst009n18; -1; bphyst032k01; -1; bphyst038f19; -1	Glyceraldehyde-3-phosphate dehydrogenase/erythrose-4-phosphate dehydrogenase	Carbohydrate transport and metabolism		--	--	GAPC3, gpc3; cytosolic glyceroldehyde-3-phosphate dehydrogenase GAPC3 (EC:1.2.1.12); K00134 glyceraldehyde 3-phosphate dehydrogenase [EC:1.2.1.12]	Metabolism; Carbohydrate Metabolism; Glycolysis / Gluconeogenesis [PATH:ko00010] Human Diseases; Neurodegenerative Diseases; Alzheimer's disease [PATH:ko05010]	glyceraldehyde-3-phosphate dehydrogenase [Triticum monococcum]	Phyllostachys edulis cDNA clone: bphyst009n18, full insert sequence	Glyceraldehyde-3-phosphate dehydrogenase, cytosolic 3 OS=Zea mays GN=GAPC3 PE=2 SV=1	Glyceraldehyde-3-phosphate dehydrogenase (Fragment) OS=Triticum monococcum GN=GPD1 PE=2 SV=1
Munro_Bamboo_unigene_BMK_32247; 1; Munro_Bamboo_unigene_BMK_38933; 1; bphyst032a07; 1	--	--	--	--	hypothetical protein	--	hypothetical protein SORBIDRAFT_03g041460 [Sorghum bicolor] gb|EES01846.1| hypothetical protein SORBIDRAFT_03g041460 [Sorghum bicolor]	Phyllostachys edulis cDNA clone: bphyst032a07, full insert sequence	--	Putative uncharacterized protein Sb03g041460 OS=Sorghum bicolor GN=Sb03g041460 PE=4 SV=1
Munro_Bamboo_unigene_BMK_32265; 1; bphyem122g04; -1	Ca2+-binding protein (EF-Hand superfamily)	--		--	--	Os12g0603800	--	Os12g0603800 [Oryza sativa Japonica Group] sp|Q948R0.1|CML5_ORYSJ RecName: Full=Calmodulin-like protein 5; AltName: Full=Calmodulin-2; AltName: Full=OsCAM-2 dbj|BAB69673.1| Calmodulin-2 [Oryza sativa Japonica Group] gb|ABA99816.1| Calmodulin, putative, expressed [Oryza sativa Japonica Group] dbj|BAF30234.1| Os12g0603800 [Oryza sativa Japonica Group] gb|EAY83798.1| hypothetical protein OsI_39013 [Oryza sativa Indica Group] gb|EAZ21134.1| hypothetical protein OsJ_36778 [Oryza sativa Japonica Group]	Phyllostachys edulis cDNA clone: bphyem122g04, full insert sequence	Calmodulin-like protein 5 OS=Oryza sativa subsp. japonica GN=CML5 PE=2 SV=1	Putative uncharacterized protein OS=Oryza sativa subsp. indica GN=OsI_39013 PE=4 SV=1
Munro_Bamboo_unigene_BMK_32274; -1; Munro_Bamboo_unigene_BMK_66107; 1; bphyem206d15; 1	--	--	--	--	Os02g0661100	--	Os02g0661100 [Oryza sativa Japonica Group] dbj|BAD12596.1| trehalose-6-phosphate phosphatase [Oryza sativa Japonica Group] dbj|BAD25622.1| trehalose-6-phosphate phosphatase [Oryza sativa Japonica Group] dbj|BAD25753.1| trehalose-6-phosphate phosphatase [Oryza sativa Japonica Group] dbj|BAF09559.1| Os02g0661100 [Oryza sativa Japonica Group] gb|ACB45594.1| trehalose-6-phosphate phosphatase [Oryza sativa Indica Group] dbj|BAG96056.1| unnamed protein product [Oryza sativa Japonica Group] gb|EEC73735.1| hypothetical protein OsI_08360 [Oryza sativa Indica Group] gb|EEE57517.1| hypothetical protein OsJ_07820 [Oryza sativa Japonica Group]	Phyllostachys edulis cDNA clone: bphyem206d15, full insert sequence	--	Os02g0661100 protein OS=Oryza sativa subsp. japonica GN=OsTPP1 PE=2 SV=1
Munro_Bamboo_unigene_BMK_3228; 1; bphylf044e02; 1	Tubulin	Cytoskeleton		Biological Process: GTP catabolic process (GO:0006184);; Biological Process: microtubule-based movement (GO:0007018);	Biological Process: microtubule-based process (GO:0007017);	Biological Process: protein polymerization (GO:0051258);	Cellular Component: microtubule (GO:0005874);	Cellular Component: protein complex (GO:0043234);	Molecular Function: GTP binding (GO:0005525);	Molecular Function: GTPase activity (GO:0003924);	Molecular Function: structural molecule activity (GO:0005198);	IPR000217: Tubulin; IPR002452: Alpha tubulin	IPR003008: Tubulin/FtsZ, GTPase domain	IPR008280: Tubulin/FtsZ, C-terminal	IPR017975: Tubulin, conserved site	IPR018316: Tubulin/FtsZ, 2-layer sandwich domain	IPR023123: Tubulin, C-terminal	tua6, TUBA6; alpha tubulin6; K07374 tubulin alpha	Cellular Processes; Transport and Catabolism; Phagosome [PATH:ko04145] Cellular Processes; Cell Motility; Cytoskeleton proteins [BR:ko04812] Cellular Processes; Cell Communication; Gap junction [PATH:ko04540] Human Diseases; Infectious Diseases; Pathogenic Escherichia coli infection [PATH:ko05130]	RecName: Full=Tubulin alpha-3 chain; AltName: Full=Alpha-3-tubulin gb|AAC05719.1| alpha-tubulin 3 [Eleusine indica]	Phyllostachys edulis cDNA clone: bphylf044e02, full insert sequence	Tubulin alpha-3 chain OS=Eleusine indica GN=TUBA3 PE=2 SV=1	Putative uncharacterized protein OS=Zea mays PE=2 SV=1
Munro_Bamboo_unigene_BMK_3229; 1; bphyem003b24; -1; bphyem003o24; -1; bphyst019i05; -1	Superfamily II DNA and RNA helicases	--		--	--	Os04g0465600	--	hypothetical protein OsI_16233 [Oryza sativa Indica Group]	Phyllostachys edulis cDNA clone: bphyem003o24, full insert sequence	MLP-like protein 423 OS=Arabidopsis thaliana GN=MLP423 PE=1 SV=1	Putative uncharacterized protein OS=Oryza sativa subsp. indica GN=OsI_16233 PE=4 SV=1
Munro_Bamboo_unigene_BMK_32367; 1; Munro_Bamboo_unigene_BMK_41207; 1; bphyem113c08; -1	ABC-type uncharacterized transport system, permease component	General function prediction only		--	IPR005226: Conserved hypothetical protein CHP00245	hypothetical protein; K02069 putative ABC transport system permease protein	Environmental Information Processing; Membrane Transport; Transporters [BR:ko02000]	hypothetical protein SORBIDRAFT_09g002000 [Sorghum bicolor] gb|EES18927.1| hypothetical protein SORBIDRAFT_09g002000 [Sorghum bicolor]	Phyllostachys edulis cDNA clone: bphyem113c08, full insert sequence	UPF0014 membrane protein STAR2 OS=Oryza sativa subsp. japonica GN=STAR2 PE=1 SV=1	Putative uncharacterized protein Sb09g002000 OS=Sorghum bicolor GN=Sb09g002000 PE=4 SV=1
Munro_Bamboo_unigene_BMK_32403; -1; Munro_Bamboo_unigene_BMK_33683; 1; bphyem211a08; 1	--	--	Biological Process: protein phosphorylation (GO:0006468);; Molecular Function: ATP binding (GO:0005524);	Molecular Function: protein kinase activity (GO:0004672);	Molecular Function: transferase activity, transferring phosphorus-containing groups (GO:0016772);	IPR000719: Protein kinase, catalytic domain; IPR001245: Serine-threonine/tyrosine-protein kinase	IPR011009: Protein kinase-like domain	IPR017441: Protein kinase, ATP binding site	Os01g0973500	--	hypothetical protein OsI_05407 [Oryza sativa Indica Group]	Phyllostachys edulis cDNA clone: bphyem211a08, full insert sequence	Serine/threonine-protein kinase BIK1 OS=Arabidopsis thaliana GN=BIK1 PE=1 SV=1	Os01g0973500 protein OS=Oryza sativa subsp. japonica GN=P0698H10.18 PE=2 SV=1
Munro_Bamboo_unigene_BMK_32461; 1; bphyem117c09; 1	GTPase SAR1 and related small G proteins	General function prediction only		--	--	Os03g0666500; K07887 Ras-related protein Rab-5A	Environmental Information Processing; Signaling Molecules and Interaction; GTP-binding proteins [BR:ko04031] Cellular Processes; Transport and Catabolism; Endocytosis  Cellular Processes; Transport and Catabolism; Phagosome  Organismal Systems; Excretory System; Vasopressin-regulated water reabsorption  Human Diseases; Neurodegenerative Diseases; Amyotrophic lateral sclerosis (ALS)  Human Diseases; Infectious Diseases; Amoebiasis	Os03g0666500 [Oryza sativa Japonica Group] gb|AAR87186.1| putative small GTP-binding protein [Oryza sativa Japonica Group] gb|ABF98072.1| Ras-related protein RHN1, putative, expressed [Oryza sativa Japonica Group] dbj|BAF12760.1| Os03g0666500 [Oryza sativa Japonica Group] dbj|BAG87790.1| unnamed protein product [Oryza sativa Japonica Group] dbj|BAG90431.1| unnamed protein product [Oryza sativa Japonica Group]	Phyllostachys edulis cDNA clone: bphyem117c09, full insert sequence	Ras-related protein RABF2A OS=Arabidopsis thaliana GN=RABF2A PE=1 SV=1	Os03g0666500 protein OS=Oryza sativa subsp. japonica GN=OSJNBa0056E06.11 PE=2 SV=1
Munro_Bamboo_unigene_BMK_32748; 1; bphyem203c14; 1	--	--	Molecular Function: protein binding (GO:0005515);	IPR001611: Leucine-rich repeat; IPR003591: Leucine-rich repeat, typical subtype	Os05g0188700	--	Os05g0188700 [Oryza sativa Japonica Group] dbj|BAH01480.1| unnamed protein product [Oryza sativa Japonica Group] gb|EEE62595.1| hypothetical protein OsJ_17398 [Oryza sativa Japonica Group] dbj|BAH92983.1| Os05g0188700 [Oryza sativa Japonica Group]	Phyllostachys edulis cDNA clone: bphyem203c14, full insert sequence	Leucine-rich repeat extensin-like protein 6 OS=Arabidopsis thaliana GN=LRX6 PE=2 SV=1	Os05g0188700 protein OS=Oryza sativa subsp. japonica GN=Os05g0188700 PE=2 SV=1
Munro_Bamboo_unigene_BMK_32935; 1; bbasst002l05; 1; bphyst002c14; 1	--	--	--	--	Os11g0629400	--	hypothetical protein OsI_36745 [Oryza sativa Indica Group]	Phyllostachys edulis cDNA clone: bbasst002l05, full insert sequence	--	Expressed protein OS=Oryza sativa subsp. japonica GN=Os11g0629400 PE=4 SV=1
Munro_Bamboo_unigene_BMK_33109; 1; bphylf024g06; -1	--	--	--	--	Os04g0465100	--	hypothetical protein OsJ_15097 [Oryza sativa Japonica Group]	Phyllostachys edulis cDNA clone: bphylf024g06, full insert sequence	Peroxidase 65 OS=Arabidopsis thaliana GN=PER65 PE=2 SV=2	Class III peroxidase 55 OS=Oryza sativa subsp. japonica GN=OSJNBa0060P14.16 PE=2 SV=1
Munro_Bamboo_unigene_BMK_33149; 1; bphylf042g19; -1	--	--	--	--	hypothetical protein	--	hypothetical protein SORBIDRAFT_02g042040 [Sorghum bicolor] gb|EER99862.1| hypothetical protein SORBIDRAFT_02g042040 [Sorghum bicolor]	Phyllostachys edulis cDNA clone: bphylf042g19, full insert sequence	Pentatricopeptide repeat-containing protein At1g01970 OS=Arabidopsis thaliana GN=At1g01970 PE=2 SV=1	Os07g0661900 protein OS=Oryza sativa subsp. japonica GN=P0453E03.112 PE=2 SV=1
Munro_Bamboo_unigene_BMK_3347; 1; bphylf032k22; 1; bphylf048p05; 1	Zn-dependent alcohol dehydrogenases	General function prediction only		Biological Process: oxidation-reduction process (GO:0055114);; Molecular Function: nucleotide binding (GO:0000166);	Molecular Function: oxidoreductase activity (GO:0016491);	Molecular Function: transferase activity, transferring acyl groups other than amino-acyl groups (GO:0016747);	Molecular Function: zinc ion binding (GO:0008270);	IPR002085: Alcohol dehydrogenase superfamily, zinc-type; IPR011032: GroES-like	IPR013149: Alcohol dehydrogenase, C-terminal	IPR013154: Alcohol dehydrogenase GroES-like	IPR016040: NAD(P)-binding domain	IPR020843: Polyketide synthase, enoylreductase	hypothetical protein	--	RecName: Full=Probable cinnamyl alcohol dehydrogenase 8C; Short=OsCAD8C gb|EEC84548.1| hypothetical protein OsI_31294 [Oryza sativa Indica Group] gb|EEE69662.1| hypothetical protein OsJ_29283 [Oryza sativa Japonica Group]	Phyllostachys edulis cDNA clone: bphylf032k22, full insert sequence	Probable cinnamyl alcohol dehydrogenase 8C OS=Oryza sativa subsp. japonica GN=CAD8C PE=2 SV=2	Putative uncharacterized protein OS=Oryza sativa subsp. indica GN=OsI_31294 PE=3 SV=1
Munro_Bamboo_unigene_BMK_33513; 1; bphylf053g01; -1	Predicted nucleoside-diphosphate-sugar epimerases	--		--	--	hypothetical protein	--	hypothetical protein SORBIDRAFT_07g023080 [Sorghum bicolor] gb|EES15131.1| hypothetical protein SORBIDRAFT_07g023080 [Sorghum bicolor]	Phyllostachys edulis cDNA clone: bphylf053g01, full insert sequence	Uncharacterized protein At2g34460, chloroplastic OS=Arabidopsis thaliana GN=At2g34460 PE=1 SV=1	Putative uncharacterized protein Sb07g023080 OS=Sorghum bicolor GN=Sb07g023080 PE=4 SV=1
Munro_Bamboo_unigene_BMK_33632; 1; bphylf042e03; -1	--	--	--	--	hypothetical protein	--	hypothetical protein SORBIDRAFT_01g031850 [Sorghum bicolor] gb|EER92084.1| hypothetical protein SORBIDRAFT_01g031850 [Sorghum bicolor]	Sorghum bicolor hypothetical protein, mRNA	Uncharacterized protein ycf36 OS=Cyanophora paradoxa GN=ycf36 PE=3 SV=1	Putative uncharacterized protein Sb01g031850 OS=Sorghum bicolor GN=Sb01g031850 PE=4 SV=1
Munro_Bamboo_unigene_BMK_3370; 1; bphylf060p11; -1	Glutamine synthetase	Amino acid transport and metabolism		--	--	Os02g0735200; K01915 glutamine synthetase [EC:6.3.1.2]	Metabolism; Energy Metabolism; Nitrogen metabolism [PATH:ko00910] Metabolism; Amino Acid Metabolism; Alanine, aspartate and glutamate metabolism [PATH:ko00250] Metabolism; Amino Acid Metabolism; Arginine and proline metabolism [PATH:ko00330] Environmental Information Processing; Signal Transduction; Two-component system [PATH:ko02020]	Os02g0735200 [Oryza sativa Japonica Group] sp|P14656.1|GLN11_ORYSJ RecName: Full=Glutamine synthetase cytosolic isozyme 1-1; AltName: Full=Glutamate--ammonia ligase GLN1;1; Short=OsGLN1;1; AltName: Full=Glutamine synthetase shoot isozyme; AltName: Full=OsGS1;1 emb|CAA32461.1| unnamed protein product [Oryza sativa Japonica Group] dbj|BAA95679.1| cytosolic glutamine synthethase 1;1 [Oryza sativa Japonica Group] dbj|BAA95678.1| cytosolic glutamine synthetase 1;1 [Oryza sativa Japonica Group] dbj|BAD15892.1| glutamine synthetase shoot isozyme [Oryza sativa Japonica Group] dbj|BAF09959.1| Os02g0735200 [Oryza sativa Japonica Group] gb|EAZ24534.1| hypothetical protein OsJ_08295 [Oryza sativa Japonica Group] dbj|BAG87764.1| unnamed protein product [Oryza sativa Japonica Group] dbj|BAG97064.1| unnamed protein product [Oryza sativa Japonica Group]	Phyllostachys edulis cDNA clone: bphylf060p11, full insert sequence	Glutamine synthetase cytosolic isozyme 1-1 OS=Oryza sativa subsp. japonica GN=GLN1-1 PE=1 SV=1	Glutamine synthetase OS=Oryza sativa subsp. japonica GN=Os02g0735200 PE=2 SV=1
Munro_Bamboo_unigene_BMK_33778; 1; bphylf052a10; 1	Serine/threonine protein kinase	--		--	--	Os02g0625300	--	Os02g0625300 [Oryza sativa Japonica Group] dbj|BAF09392.2| Os02g0625300 [Oryza sativa Japonica Group]	Phyllostachys edulis cDNA clone: bphylf052a10, full insert sequence	Calcium-dependent protein kinase 17 OS=Arabidopsis thaliana GN=CPK17 PE=2 SV=1	Phosphoenolpyruvate carboxylase kinase OS=Oryza sativa subsp. japonica GN=OsPPCK2L PE=2 SV=1
Munro_Bamboo_unigene_BMK_3391; 1; bphylf044m05; 1	Peptidyl-prolyl cis-trans isomerase (rotamase) - cyclophilin family	Posttranslational modification, protein turnover, chaperones		Biological Process: protein folding (GO:0006457);; Molecular Function: peptidyl-prolyl cis-trans isomerase activity (GO:0003755);	IPR002130: Peptidyl-prolyl cis-trans isomerase, cyclophilin-type; IPR015891: Cyclophilin-like	IPR020892: Peptidyl-prolyl cis-trans isomerase, cyclophilin-type, conserved site	Os06g0708500; K01802 peptidylprolyl isomerase [EC:5.2.1.8]	Unclassified; Genetic Information Processing; Protein folding and associated processing	hypothetical protein OsI_24414 [Oryza sativa Indica Group]	Phyllostachys edulis cDNA clone: bphylf044m05, full insert sequence	Peptidyl-prolyl cis-trans isomerase CYP20-1 OS=Arabidopsis thaliana GN=CYP20-1 PE=1 SV=1	Peptidyl-prolyl cis-trans isomerase OS=Oryza sativa subsp. indica GN=OsI_24414 PE=3 SV=1
Munro_Bamboo_unigene_BMK_33991; 1; bphylf003e06; -1	--	--	--	--	hypothetical protein; K12890 splicing factor, arginine/serine-rich 1/9	Genetic Information Processing; Transcription; Spliceosome [PATH:ko03040] Genetic Information Processing; Transcription; Spliceosome [BR:ko03041]	Pre-mRNA splicing factor SF2, putative, expressed [Oryza sativa Japonica Group] dbj|BAG88168.1| unnamed protein product [Oryza sativa Japonica Group] gb|EEC75236.1| hypothetical protein OsI_11526 [Oryza sativa Indica Group] gb|EEE59043.1| hypothetical protein OsJ_10806 [Oryza sativa Japonica Group]	Phyllostachys edulis cDNA clone: bphylf003e06, full insert sequence	Zinc finger Ran-binding domain-containing protein 2 OS=Pongo abelii GN=ZRANB2 PE=2 SV=1	Pre-mRNA splicing factor SF2, putative, expressed OS=Oryza sativa subsp. japonica GN=LOC_Os03g22380 PE=2 SV=1
Munro_Bamboo_unigene_BMK_3402; 1; bphylf049i16; -1	Ribosomal protein L4	Translation, ribosomal structure and biogenesis		Biological Process: translation (GO:0006412);; Cellular Component: ribosome (GO:0005840);	Molecular Function: structural constituent of ribosome (GO:0003735);	IPR002136: Ribosomal protein L4/L1e; IPR013000: Ribosomal protein L4/L1e, eukaryotic/archaeal, conserved site	IPR023574: Ribosomal protein L4 domain	Os07g0180900; K02930 large subunit ribosomal protein L4e	Genetic Information Processing; Translation; Ribosome [PATH:ko03010] Genetic Information Processing; Translation; Ribosome [BR:ko03011]	Os07g0180900 [Oryza sativa Japonica Group] dbj|BAF20955.2| Os07g0180900 [Oryza sativa Japonica Group]	Phyllostachys edulis cDNA clone: bphylf049i16, full insert sequence	60S ribosomal protein L4-1 OS=Arabidopsis thaliana GN=RPL4A PE=2 SV=1	Os07g0180900 protein (Fragment) OS=Oryza sativa subsp. japonica GN=Os07g0180900 PE=4 SV=1
Munro_Bamboo_unigene_BMK_34037; 1; bphyem127b05; 1	--	--	--	--	Os09g0504700	--	Os09g0504700 [Oryza sativa Japonica Group] dbj|BAG96390.1| unnamed protein product [Oryza sativa Japonica Group] dbj|BAG93693.1| unnamed protein product [Oryza sativa Japonica Group] dbj|BAF25510.2| Os09g0504700 [Oryza sativa Japonica Group]	Phyllostachys edulis cDNA clone: bphyem127b05, full insert sequence	E3 ubiquitin ligase RNF4 OS=Mus musculus GN=Rnf4 PE=1 SV=1	Os09g0504700 protein OS=Oryza sativa subsp. japonica GN=Os09g0504700 PE=2 SV=1
Munro_Bamboo_unigene_BMK_34058; 1; bphylf047f12; 1	--	--	--	--	Os09g0423500	--	Os09g0423500 [Oryza sativa Japonica Group] dbj|BAD33424.1| putative nucleoid DNA-binding protein cnd41, chloroplast [Oryza sativa Japonica Group] dbj|BAD33657.1| putative nucleoid DNA-binding protein cnd41, chloroplast [Oryza sativa Japonica Group] dbj|BAF25126.1| Os09g0423500 [Oryza sativa Japonica Group] dbj|BAG99842.1| unnamed protein product [Oryza sativa Japonica Group] gb|EEE69728.1| hypothetical protein OsJ_29412 [Oryza sativa Japonica Group]	Phyllostachys edulis cDNA clone: bphylf047f12, full insert sequence	Aspartic proteinase nepenthesin-2 OS=Nepenthes gracilis GN=nep2 PE=1 SV=1	Os09g0423500 protein OS=Oryza sativa subsp. japonica GN=OJ1740_D06.46 PE=2 SV=1
Munro_Bamboo_unigene_BMK_34192; 1; bphyst009i11; -1	Arginase/agmatinase/formimionoglutamate hydrolase, arginase family	Amino acid transport and metabolism		Molecular Function: hydrolase activity, acting on carbon-nitrogen (but not peptide) bonds, in linear amidines (GO:0016813);; Molecular Function: metal ion binding (GO:0046872);	IPR006035: Ureohydrolase; IPR020855: Ureohydrolase, manganese-binding site	IPR023696: Ureohydrolase domain	hypothetical protein; K01476 arginase [EC:3.5.3.1]	Metabolism; Amino Acid Metabolism; Arginine and proline metabolism [PATH:ko00330] Human Diseases; Infectious Diseases; Amoebiasis [PATH:ko05146]	hypothetical protein SORBIDRAFT_06g000580 [Sorghum bicolor] gb|EES10350.1| hypothetical protein SORBIDRAFT_06g000580 [Sorghum bicolor]	Phyllostachys edulis cDNA clone: bphyst009i11, full insert sequence	Arginase OS=Arabidopsis thaliana GN=At4g08900 PE=2 SV=1	Putative uncharacterized protein Sb06g000580 OS=Sorghum bicolor GN=Sb06g000580 PE=3 SV=1
Munro_Bamboo_unigene_BMK_3423; 1; bphylf032m20; 1; bphyst008n19; 1	Ribosomal protein L16/L10E	Translation, ribosomal structure and biogenesis		--	--	Os05g0169100; K02866 large subunit ribosomal protein L10e	Genetic Information Processing; Translation; Ribosome [PATH:ko03010] Genetic Information Processing; Translation; Ribosome [BR:ko03011]	Os05g0169100 [Oryza sativa Japonica Group] sp|Q0DKF0.1|RL102_ORYSJ RecName: Full=60S ribosomal protein L10-2; AltName: Full=Protein QM1; AltName: Full=Putative tumor suppressor SG12 sp|A2Y0T4.2|RL102_ORYSI RecName: Full=60S ribosomal protein L10-2; AltName: Full=Protein QM1; AltName: Full=Putative tumor suppressor SG12 gb|AAA98698.1| similar to human QM protein, a putative tumor supressor, and to maize ubiquinol-cytochrome C reductase complex subunit VI requiring protein SC34 [Oryza sativa] dbj|BAF16673.1| Os05g0169100 [Oryza sativa Japonica Group] dbj|BAG89834.1| unnamed protein product [Oryza sativa Japonica Group] dbj|BAG99846.1| unnamed protein product [Oryza sativa Japonica Group] gb|EEE62476.1| hypothetical protein OsJ_17273 [Oryza sativa Japonica Group]	Phyllostachys edulis cDNA clone: bphylf032m20, full insert sequence	60S ribosomal protein L10-2 OS=Oryza sativa subsp. japonica GN=SG12 PE=2 SV=1	Putative uncharacterized protein OS=Oryza sativa subsp. japonica GN=OsJ_17273 PE=2 SV=1
Munro_Bamboo_unigene_BMK_34320; 1; bphyst026b21; 1	--	--	--	IPR006696: Protein of unknown function DUF423	hypothetical protein	--	hypothetical protein SORBIDRAFT_01g007930 [Sorghum bicolor] gb|EER93449.1| hypothetical protein SORBIDRAFT_01g007930 [Sorghum bicolor]	Phyllostachys edulis cDNA clone: bphyst026b21, full insert sequence	UPF0451 protein C17orf61 homolog OS=Bufo bufo gargarizans PE=3 SV=1	Putative uncharacterized protein Sb01g007930 OS=Sorghum bicolor GN=Sb01g007930 PE=4 SV=1
Munro_Bamboo_unigene_BMK_34332; 1; bphylf057p12; 1	Proteins involved in synaptic transmission and general secretion, Sec1 family	Intracellular trafficking, secretion, and vesicular transport		Biological Process: vesicle docking involved in exocytosis (GO:0006904);; Biological Process: vesicle-mediated transport (GO:0016192);	IPR001619: Sec1-like protein	pco124118(403); LOC100286026; K12479 vacuolar protein sorting-associated protein 45	Cellular Processes; Transport and Catabolism; Endocytosis	hypothetical protein SORBIDRAFT_07g019770 [Sorghum bicolor] gb|EES13788.1| hypothetical protein SORBIDRAFT_07g019770 [Sorghum bicolor]	Phyllostachys edulis cDNA clone: bphylf057p12, full insert sequence	Vacuolar protein sorting-associated protein 45 homolog OS=Arabidopsis thaliana GN=VPS45 PE=1 SV=2	Putative uncharacterized protein Sb07g019770 OS=Sorghum bicolor GN=Sb07g019770 PE=4 SV=1
Munro_Bamboo_unigene_BMK_34444; 1; bphyem208k02; 1	ATP-dependent 26S proteasome regulatory subunit	Posttranslational modification, protein turnover, chaperones		--	--	Os02g0325100; K03063 26S proteasome regulatory subunit T3	Genetic Information Processing; Folding, Sorting and Degradation; Proteasome  Genetic Information Processing; Folding, Sorting and Degradation; Proteasome [BR:ko03051]	hypothetical protein OsI_06998 [Oryza sativa Indica Group] gb|EEE56866.1| hypothetical protein OsJ_06499 [Oryza sativa Japonica Group]	Phyllostachys edulis cDNA clone: bphyem208k02, full insert sequence	26S protease regulatory subunit 6B homolog OS=Arabidopsis thaliana GN=RPT3 PE=1 SV=1	Os02g0325100 protein OS=Oryza sativa subsp. japonica GN=P0476C12.12 PE=2 SV=1
Munro_Bamboo_unigene_BMK_34454; 1; bphyem113g19; 1	Uncharacterized protein conserved in bacteria	Function unknown		--	--	Os07g0240400	--	hypothetical protein OsI_25476 [Oryza sativa Indica Group]	Phyllostachys edulis cDNA clone: bphyem113g19, full insert sequence	Atherin OS=Homo sapiens GN=SAMD1 PE=1 SV=1	Os07g0240400 protein OS=Oryza sativa subsp. japonica GN=P0523A04.123 PE=4 SV=1
Munro_Bamboo_unigene_BMK_34509; 1; bphyem101d15; 1	Lactate dehydrogenase and related dehydrogenases	--		Biological Process: metabolic process (GO:0008152);; Biological Process: oxidation-reduction process (GO:0055114);	Molecular Function: NAD binding (GO:0051287);	Molecular Function: cofactor binding (GO:0048037);	Molecular Function: nucleotide binding (GO:0000166);	Molecular Function: oxidoreductase activity, acting on the CH-OH group of donors, NAD or NADP as acceptor (GO:0016616);	IPR006139: D-isomer specific 2-hydroxyacid dehydrogenase, catalytic domain; IPR006140: D-isomer specific 2-hydroxyacid dehydrogenase, NAD-binding	IPR016040: NAD(P)-binding domain	glyoxylate reductase	--	glyoxylate reductase [Zea mays] gb|ACG37807.1| glyoxylate reductase [Zea mays] gb|ACR34451.1| unknown [Zea mays]	Phyllostachys edulis cDNA clone: bphyem101d15, full insert sequence	Glyoxylate reductase OS=Pyrococcus horikoshii (strain ATCC 700860 / DSM 12428 / JCM 9974 / NBRC 100139 / OT-3) GN=gyaR PE=1 SV=2	Glyoxylate reductase OS=Zea mays PE=2 SV=1
Munro_Bamboo_unigene_BMK_3455; 1; Munro_Bamboo_unigene_BMK_51450; -1; bphylf037i07; 1	--	--	Molecular Function: protein binding (GO:0005515);	IPR001611: Leucine-rich repeat; IPR013210: Leucine-rich repeat-containing N-terminal, type 2	Os03g0440900	--	Os03g0440900 [Oryza sativa Japonica Group] gb|AAO23085.1| putative leucine-rich repeat protein [Oryza sativa Japonica Group] gb|ABF96847.1| BRASSINOSTEROID INSENSITIVE 1-associated receptor kinase 1 precursor, putative, expressed [Oryza sativa Japonica Group] dbj|BAF12372.1| Os03g0440900 [Oryza sativa Japonica Group] gb|EAY90604.1| hypothetical protein OsI_12203 [Oryza sativa Indica Group] gb|EAZ27458.1| hypothetical protein OsJ_11406 [Oryza sativa Japonica Group] dbj|BAG88074.1| unnamed protein product [Oryza sativa Japonica Group] dbj|BAG91564.1| unnamed protein product [Oryza sativa Japonica Group]	Phyllostachys edulis cDNA clone: bphylf037i07, full insert sequence	Somatic embryogenesis receptor kinase 2 OS=Arabidopsis thaliana GN=SERK2 PE=1 SV=1	BRASSINOSTEROID INSENSITIVE 1-associated receptor kinase 1, putative, expressed OS=Oryza sativa subsp. japonica GN=OSJNBa0051C19.5 PE=2 SV=1
Munro_Bamboo_unigene_BMK_3458; 1; bphylf036g21; 1	--	--	--	IPR005301: Mob1/phocein	mps one binder kinase activator-like 1A	--	mps one binder kinase activator-like 1A [Zea mays] gb|ACN27334.1| unknown [Zea mays]	Phyllostachys edulis cDNA clone: bphylf036g21, full insert sequence	Mps one binder kinase activator-like 1 OS=Arabidopsis thaliana GN=At4g19045 PE=2 SV=1	Mps one binder kinase activator-like 1A OS=Zea mays PE=2 SV=1
Munro_Bamboo_unigene_BMK_34632; -1; Munro_Bamboo_unigene_BMK_53776; 1; bphylf028f14; 1	--	--	--	--	hypothetical protein	--	hypothetical protein SORBIDRAFT_02g031510 [Sorghum bicolor] gb|EER99281.1| hypothetical protein SORBIDRAFT_02g031510 [Sorghum bicolor]	Phyllostachys edulis cDNA clone: bphylf028f14, full insert sequence	Serine/threonine protein phosphatase 2A 57 kDa regulatory subunit B' alpha isoform OS=Arabidopsis thaliana GN=B'ALPHA PE=1 SV=1	Putative uncharacterized protein Sb02g031510 OS=Sorghum bicolor GN=Sb02g031510 PE=4 SV=1
Munro_Bamboo_unigene_BMK_34670; 1; bphyem124o14; 1	--	--	--	--	hypothetical protein	--	hypothetical protein OsI_08301 [Oryza sativa Indica Group]	Phyllostachys edulis cDNA clone: bphyem124o14, full insert sequence	Probable WRKY transcription factor 12 OS=Arabidopsis thaliana GN=WRKY12 PE=2 SV=1	WRKY-like DNA-binding protein OS=Oryza sativa GN=C90ERIPDM PE=4 SV=1
Munro_Bamboo_unigene_BMK_34702; 1; bphylf058l11; -1	Ribosomal protein L3	Translation, ribosomal structure and biogenesis		--	--	Os02g0137200; K02906 large subunit ribosomal protein L3	Genetic Information Processing; Translation; Ribosome [PATH:ko03010] Genetic Information Processing; Translation; Ribosome [BR:ko03011]	putative 50S ribosomal protein L3 [Oryza sativa Japonica Group]	Phyllostachys edulis cDNA clone: bphylf058l11, full insert sequence	50S ribosomal protein L3, chloroplastic (Fragment) OS=Nicotiana tabacum GN=RPL3 PE=1 SV=1	Putative 50S ribosomal protein L3 OS=Oryza sativa subsp. japonica GN=OSJNBa0026E05.4 PE=3 SV=1
Munro_Bamboo_unigene_BMK_34729; 1; bphyst010l05; -1	--	--	--	--	Os12g0568700	--	hypothetical protein OsI_38774 [Oryza sativa Indica Group]	Phyllostachys edulis cDNA clone: bphyst010l05, full insert sequence	UPF0497 membrane protein 3 OS=Ricinus communis GN=RCOM_0464280 PE=2 SV=1	Expressed protein OS=Oryza sativa subsp. japonica GN=Os12g0568700 PE=4 SV=1
Munro_Bamboo_unigene_BMK_34739; 1; bphyem205b07; -1; bphyem206d03; -1	--	--	--	--	hypothetical protein	--	hypothetical protein SORBIDRAFT_02g035310 [Sorghum bicolor] gb|EER99480.1| hypothetical protein SORBIDRAFT_02g035310 [Sorghum bicolor]	Phyllostachys edulis cDNA clone: bphyem205b07, full insert sequence	Aspartic proteinase nepenthesin-2 OS=Nepenthes gracilis GN=nep2 PE=1 SV=1	Putative uncharacterized protein Sb02g035310 OS=Sorghum bicolor GN=Sb02g035310 PE=4 SV=1
Munro_Bamboo_unigene_BMK_34742; 1; bphylf058g22; -1	--	--	Cellular Component: cytoplasm (GO:0005737);; Cellular Component: nucleus (GO:0005634);	IPR006773: 26S proteasome complex ubiquitin receptor, subunit Rpn13	Os05g0594800	--	Os05g0594800 [Oryza sativa Japonica Group] dbj|BAF18423.2| Os05g0594800 [Oryza sativa Japonica Group]	Phyllostachys edulis cDNA clone: bphylf058g22, full insert sequence	Proteasomal ubiquitin receptor ADRM1 OS=Homo sapiens GN=ADRM1 PE=1 SV=2	Os05g0594800 protein (Fragment) OS=Oryza sativa subsp. japonica GN=Os05g0594800 PE=4 SV=1
Munro_Bamboo_unigene_BMK_34749; 1; bphylf044g09; 1	--	--	--	--	--	--	--	Phyllostachys edulis cDNA clone: bphylf044g09, full insert sequence	--	--
Munro_Bamboo_unigene_BMK_3479; 1; bphylf036o06; 1; bphyst005m04; 1	--	--	--	--	hypothetical protein; K02903 large subunit ribosomal protein L28e	Genetic Information Processing; Translation; Ribosome [PATH:ko03010] Genetic Information Processing; Translation; Ribosome [BR:ko03011]	hypothetical protein SORBIDRAFT_03g032450 [Sorghum bicolor] gb|EES01347.1| hypothetical protein SORBIDRAFT_03g032450 [Sorghum bicolor]	Phyllostachys edulis cDNA clone: bphylf036o06, full insert sequence	60S ribosomal protein L28-1 OS=Arabidopsis thaliana GN=RPL28A PE=1 SV=1	Putative uncharacterized protein Sb03g032450 OS=Sorghum bicolor GN=Sb03g032450 PE=4 SV=1
Munro_Bamboo_unigene_BMK_3485; 1; bphylf003i03; -1; bphylf026p08; -1; bphylf032b20; -1; bphyst010k07; -1	--	--	--	--	Os06g0697000; K08235 xyloglucan:xyloglucosyl transferase [EC:2.4.1.207]	Unclassified; Metabolism; Others	xyloglucan endo-transglucosylase/hydrolase 1 [Bambusa oldhamii] gb|ABV46533.1| xyloglucan endotransglucosylase hydrolase 1 [Bambusa oldhamii]	Bambusa oldhamii xyloglucan endotransglucosylase hydrolase 1 mRNA, complete cds	Probable xyloglucan endotransglucosylase/hydrolase protein 25 OS=Arabidopsis thaliana GN=XTH25 PE=2 SV=2	Xyloglucan endo-transglucosylase/hydrolase 1 OS=Bambusa oldhamii GN=XTH1 PE=2 SV=1
Munro_Bamboo_unigene_BMK_34891; 1; bphylf003g03; -1; bphylf045p24; -1	--	--	--	--	Os07g0562700; K08914 light-harvesting complex II chlorophyll a/b binding protein 3	Metabolism; Energy Metabolism; Photosynthesis - antenna proteins [PATH:ko00196] Metabolism; Energy Metabolism; Photosynthesis proteins [BR:ko00194]	chloroplast chlorophyll a/b binding protein cab-BO3-1 [Bambusa oldhamii]	Bambusa oldhamii chloroplast chlorophyll a/b binding protein cab-BO3-1 mRNA, complete cds; nuclear gene for chloroplast product	Chlorophyll a-b binding protein 13, chloroplastic OS=Solanum lycopersicum GN=CAB13 PE=1 SV=1	Chloroplast chlorophyll a/b binding protein cab-BO3-1 OS=Bambusa oldhamii PE=2 SV=1
Munro_Bamboo_unigene_BMK_3493; 1; bphylf047a16; 1	--	--	--	--	Os04g0441900	--	Os04g0441900 [Oryza sativa Japonica Group] dbj|BAF14792.1| Os04g0441900 [Oryza sativa Japonica Group]	Phyllostachys edulis cDNA clone: bphylf047a16, full insert sequence	CLPTM1-like membrane protein cnrB OS=Dictyostelium discoideum GN=cnrB PE=3 SV=1	P0076O17.9 protein OS=Oryza sativa subsp. japonica GN=P0076O17.9 PE=4 SV=1
Munro_Bamboo_unigene_BMK_34951; 1; bphylf047n24; 1	--	--	Biological Process: proteolysis (GO:0006508);; Molecular Function: aspartic-type endopeptidase activity (GO:0004190);	IPR001461: Peptidase A1; IPR009007: Peptidase aspartic, catalytic	IPR021109: Peptidase aspartic	Os03g0186900	--	Os03g0186900 [Oryza sativa Japonica Group] dbj|BAD26705.1| Radc1 [Oryza sativa Japonica Group] gb|ABF94364.1| Eukaryotic aspartyl protease family protein, expressed [Oryza sativa Japonica Group] dbj|BAF11119.1| Os03g0186900 [Oryza sativa Japonica Group] dbj|BAG88249.1| unnamed protein product [Oryza sativa Japonica Group] dbj|BAG99854.1| unnamed protein product [Oryza sativa Japonica Group]	Phyllostachys edulis cDNA clone: bphylf047n24, full insert sequence	Aspartic proteinase nepenthesin-1 OS=Nepenthes gracilis GN=nep1 PE=1 SV=1	Eukaryotic aspartyl protease family protein, expressed OS=Oryza sativa subsp. japonica GN=Radc1 PE=2 SV=1
Munro_Bamboo_unigene_BMK_35; 1; Munro_Bamboo_unigene_BMK_36; 1; bphylf038f15; 1; bpst40101c15; 1	--	--	Molecular Function: protein binding (GO:0005515);; Molecular Function: zinc ion binding (GO:0008270);	IPR001965: Zinc finger, PHD-type; IPR011011: Zinc finger, FYVE/PHD-type	IPR013083: Zinc finger, RING/FYVE/PHD-type	IPR019786: Zinc finger, PHD-type, conserved site	IPR019787: Zinc finger, PHD-finger	IPR021998: Protein of unknown function DUF3594	Os07g0608400	--	hypothetical protein OsI_26819 [Oryza sativa Indica Group]	Phyllostachys edulis cDNA clone: bpst40101c15, full insert sequence	PHD finger protein At5g26210 OS=Arabidopsis thaliana GN=At5g26210 PE=1 SV=2	Putative uncharacterized protein OS=Oryza sativa subsp. indica GN=OsI_26819 PE=4 SV=1
Munro_Bamboo_unigene_BMK_3500; 1; bphyst003i05; -1; bphyst008l24; -1	Ribosomal protein S2	Translation, ribosomal structure and biogenesis		Biological Process: translation (GO:0006412);; Cellular Component: intracellular (GO:0005622);	Cellular Component: ribosome (GO:0005840);	Cellular Component: small ribosomal subunit (GO:0015935);	Molecular Function: structural constituent of ribosome (GO:0003735);	IPR001865: Ribosomal protein S2; IPR005707: Ribosomal protein S2, eukaryotic/archaeal	IPR018130: Ribosomal protein S2, conserved site	IPR023591: Ribosomal protein S2, flavodoxin-like domain	hypothetical protein; K02998 small subunit ribosomal protein SAe	Genetic Information Processing; Translation; Ribosome [PATH:ko03010] Genetic Information Processing; Translation; Ribosome [BR:ko03011]	hypothetical protein OsI_11954 [Oryza sativa Indica Group]	Phyllostachys edulis cDNA clone: bphyst008l24, full insert sequence	40S ribosomal protein SA OS=Vitis vinifera GN=GSVIVT00034021001 PE=3 SV=1	Putative uncharacterized protein OS=Oryza sativa subsp. indica GN=OsI_11954 PE=3 SV=1
Munro_Bamboo_unigene_BMK_35058; 1; bphyst009k19; -1	--	--	Molecular Function: DNA binding (GO:0003677);; Molecular Function: protein binding (GO:0005515);	IPR000910: High mobility group, HMG1/HMG2; IPR009071: High mobility group, superfamily	Os02g0670400	--	Os02g0670400 [Oryza sativa Japonica Group] dbj|BAD28320.1| putative high mobility group protein [Oryza sativa Japonica Group] dbj|BAD28154.1| putative high mobility group protein [Oryza sativa Japonica Group] dbj|BAF09609.1| Os02g0670400 [Oryza sativa Japonica Group]	Phyllostachys edulis cDNA clone: bphyst009k19, full insert sequence	HMG1/2-like protein OS=Vicia faba PE=2 SV=1	Os02g0670400 protein OS=Oryza sativa subsp. japonica GN=P0684A08.27 PE=4 SV=1
Munro_Bamboo_unigene_BMK_35447; 1; bphyst009e18; 1	Ribonucleotide reductase, beta subunit	Nucleotide transport and metabolism		--	--	hypothetical protein; K10808 ribonucleoside-diphosphate reductase subunit M2 [EC:1.17.4.1]	Metabolism; Nucleotide Metabolism; Purine metabolism [PATH:ko00230] Metabolism; Nucleotide Metabolism; Pyrimidine metabolism [PATH:ko00240] Metabolism; Metabolism of Other Amino Acids; Glutathione metabolism [PATH:ko00480] Genetic Information Processing; Replication and Repair; DNA repair and recombination proteins [BR:ko03400] Cellular Processes; Cell Growth and Death; p53 signaling pathway [PATH:ko04115]	putative ribonucleotide reductase R2 [Oryza sativa Japonica Group] dbj|BAD46317.1| putative ribonucleotide reductase R2 [Oryza sativa Japonica Group] gb|ACC95435.1| ribonucleotide diphosphate reductase small subunit 1 [Oryza sativa Japonica Group]	Phyllostachys edulis cDNA clone: bphyst009e18, full insert sequence	Ribonucleoside-diphosphate reductase small chain OS=Nicotiana tabacum PE=2 SV=1	Putative ribonucleotide reductase R2 OS=Oryza sativa subsp. japonica GN=P0624H09.36 PE=2 SV=1
Munro_Bamboo_unigene_BMK_35502; 1; bphylf058o01; 1	--	--	Biological Process: negative regulation of apoptosis (GO:0043066);; Cellular Component: integral to membrane (GO:0016021);	IPR006213: Bax inhibitor 1, conserved site; IPR006214: Inhibitor of apoptosis-promoting Bax1-related	hypothetical protein LOC100279826	--	Bax inhibitor-1 [Phyllostachys praecox]	Phyllostachys edulis cDNA clone: bphylf058o01, full insert sequence	Bax inhibitor 1 OS=Oryza sativa subsp. japonica GN=BI1 PE=2 SV=1	Bax inhibitor-1 OS=Phyllostachys praecox GN=BI-1 PE=2 SV=1
Munro_Bamboo_unigene_BMK_3556; 1; bphylf026a12; -1; bphyst009i19; -1	GTPase SAR1 and related small G proteins	General function prediction only		Biological Process: GTP catabolic process (GO:0006184);; Biological Process: intracellular protein transport (GO:0006886);	Biological Process: nucleocytoplasmic transport (GO:0006913);	Biological Process: protein transport (GO:0015031);	Biological Process: signal transduction (GO:0007165);	Biological Process: small GTPase mediated signal transduction (GO:0007264);	Cellular Component: intracellular (GO:0005622);	Cellular Component: membrane (GO:0016020);	Molecular Function: GTP binding (GO:0005525);	Molecular Function: GTPase activity (GO:0003924);	IPR001806: Small GTPase superfamily; IPR002041: Ran GTPase	IPR003578: Small GTPase superfamily, Rho type	IPR003579: Small GTPase superfamily, Rab type	IPR005225: Small GTP-binding protein domain	IPR020849: Small GTPase superfamily, Ras type	Os05g0574500; K07936 GTP-binding nuclear protein Ran	Genetic Information Processing; Translation; RNA transport [PATH:ko03013] Genetic Information Processing; Translation; Ribosome biogenesis in eukaryotes [PATH:ko03008] Environmental Information Processing; Signaling Molecules and Interaction; GTP-binding proteins [BR:ko04031]	Os05g0574500 [Oryza sativa Japonica Group] sp|Q7GD79.1|RAN2_ORYSJ RecName: Full=GTP-binding nuclear protein Ran-2; Short=OsRan2; AltName: Full=Ras-related nuclear protein 2 sp|A2Y7R5.1|RAN2_ORYSI RecName: Full=GTP-binding nuclear protein Ran-2; Short=OsRan2; AltName: Full=Ras-related nuclear protein 2 dbj|BAA81911.1| Ran [Oryza sativa (japonica cultivar-group)] dbj|BAB82438.1| small GTP-binding protein (Ran2) [Oryza sativa Japonica Group] gb|AAT69585.1| GTP-binding nuclear protein RAN-B1 [Oryza sativa Japonica Group] dbj|BAF18304.1| Os05g0574500 [Oryza sativa Japonica Group] gb|EAY99125.1| hypothetical protein OsI_21085 [Oryza sativa Indica Group] dbj|BAG69138.1| GTP-binding nuclear protein Ran-1 [Oryza sativa Japonica Group] dbj|BAG88061.1| unnamed protein product [Oryza sativa Japonica Group] dbj|BAG93796.1| unnamed protein product [Oryza sativa Japonica Group] gb|EEE64779.1| hypothetical protein OsJ_19635 [Oryza sativa Japonica Group]	Phyllostachys edulis cDNA clone: bphyst009i19, full insert sequence	GTP-binding nuclear protein Ran-2 OS=Oryza sativa subsp. japonica GN=RAN2 PE=2 SV=1	GTP-binding nuclear protein Ran-1 OS=Oryza sativa subsp. japonica GN=OsRan1 PE=2 SV=1
Munro_Bamboo_unigene_BMK_35643; 1; bphylf055c21; -1	Chaperonin GroEL (HSP60 family)	Posttranslational modification, protein turnover, chaperones		--	--	Os05g0147400; K09498 T-complex protein 1 subunit zeta	Genetic Information Processing; Folding, Sorting and Degradation; Chaperones and folding catalysts [BR:ko03110]	hypothetical protein OsI_18449 [Oryza sativa Indica Group]	Phyllostachys edulis cDNA clone: bphylf055c21, full insert sequence	T-complex protein 1 subunit zeta OS=Mus musculus GN=Cct6a PE=1 SV=3	Putative uncharacterized protein OS=Oryza sativa subsp. indica GN=OsI_18449 PE=3 SV=1
Munro_Bamboo_unigene_BMK_35657; 1; bphylf044d19; -1	HrpA-like helicases	Replication, recombination and repair		--	--	hypothetical protein; K14442 ATP-dependent RNA helicase DHX36 [EC:3.6.4.13]	Genetic Information Processing; Folding, Sorting and Degradation; RNA degradation [PATH:ko03018]	hypothetical protein OsJ_12573 [Oryza sativa Japonica Group]	Phyllostachys edulis cDNA clone: bphylf044d19, full insert sequence	Probable ATP-dependent RNA helicase DHX36 OS=Mus musculus GN=Dhx36 PE=2 SV=1	Putative helicase OS=Oryza sativa GN=OSJNBa0069E14.16 PE=4 SV=1
Munro_Bamboo_unigene_BMK_3582; 1; bphylf044o19; -1	--	--	--	--	hypothetical protein LOC100193368	--	hypothetical protein SORBIDRAFT_03g041010 [Sorghum bicolor] gb|EES03944.1| hypothetical protein SORBIDRAFT_03g041010 [Sorghum bicolor]	Phyllostachys edulis cDNA clone: bphylf044o19, full insert sequence	--	Putative uncharacterized protein Sb03g041010 OS=Sorghum bicolor GN=Sb03g041010 PE=4 SV=1
Munro_Bamboo_unigene_BMK_359; 1; bphyst003o19; 1	Ribosomal protein L20A (L18A)	Translation, ribosomal structure and biogenesis		Biological Process: translation (GO:0006412);; Cellular Component: ribosome (GO:0005840);	Molecular Function: structural constituent of ribosome (GO:0003735);	IPR021138: Ribosomal protein L18a; IPR023573: Ribosomal protein L18a/LX	Os05g0565000; K02882 large subunit ribosomal protein L18Ae	Genetic Information Processing; Translation; Ribosome [PATH:ko03010] Genetic Information Processing; Translation; Ribosome [BR:ko03011]	Os05g0565000 [Oryza sativa Japonica Group] gb|AAT77404.1| putative 60S ribosomal protein L18a [Oryza sativa Japonica Group] dbj|BAF18249.1| Os05g0565000 [Oryza sativa Japonica Group] gb|EAY99039.1| hypothetical protein OsI_20997 [Oryza sativa Indica Group] dbj|BAG95664.1| unnamed protein product [Oryza sativa Japonica Group] gb|EEE64706.1| hypothetical protein OsJ_19561 [Oryza sativa Japonica Group]	Phyllostachys edulis cDNA clone: bphyst024i04, full insert sequence	60S ribosomal protein L18a OS=Oryza sativa subsp. japonica GN=RPL18A PE=2 SV=1	Os05g0565000 protein OS=Oryza sativa subsp. japonica GN=OSJNBb0053D02.16 PE=2 SV=1
Munro_Bamboo_unigene_BMK_35945; 1; bphyem212a23; -1; bphylf025e08; -1	--	--	Biological Process: transmembrane transport (GO:0055085);; Biological Process: transport (GO:0006810);	Cellular Component: mitochondrial inner membrane (GO:0005743);	Molecular Function: binding (GO:0005488);	Molecular Function: transporter activity (GO:0005215);	IPR002067: Mitochondrial carrier protein; IPR002113: Adenine nucleotide translocator 1	IPR018108: Mitochondrial substrate/solute carrier	IPR023395: Mitochondrial carrier domain	Os05g0302700; K05863 solute carrier family 25 (mitochondrial carrier; adenine nucleotide translocator)	Environmental Information Processing; Signal Transduction; Calcium signaling pathway [PATH:ko04020] Human Diseases; Neurodegenerative Diseases; Parkinson's disease [PATH:ko05012] Human Diseases; Neurodegenerative Diseases; Huntington's disease [PATH:ko05016]	Os05g0302700 [Oryza sativa Japonica Group] dbj|BAF17053.1| Os05g0302700 [Oryza sativa Japonica Group] gb|EAY97443.1| hypothetical protein OsI_19373 [Oryza sativa Indica Group] dbj|BAG88044.1| unnamed protein product [Oryza sativa Japonica Group] gb|EEE63157.1| hypothetical protein OsJ_17966 [Oryza sativa Japonica Group]	Phyllostachys edulis cDNA clone: bphyem212a23, full insert sequence	ADP,ATP carrier protein, mitochondrial OS=Oryza sativa subsp. japonica GN=Os02g0718900 PE=2 SV=1	Os05g0302700 protein OS=Oryza sativa subsp. japonica GN=Os05g0302700 PE=2 SV=1
Munro_Bamboo_unigene_BMK_35964; 1; bbasst002c07; -1	--	--	Biological Process: SRP-dependent cotranslational protein targeting to membrane (GO:0006614);; Biological Process: negative regulation of translational elongation (GO:0045900);	Cellular Component: signal recognition particle (GO:0048500);	Molecular Function: 7S RNA binding (GO:0008312);	IPR008832: Signal recognition particle, SRP9 subunit; IPR009018: Signal recognition particle, SRP9/SRP14 subunit	hypothetical protein; K03109 signal recognition particle subunit SRP9	Genetic Information Processing; Folding, Sorting and Degradation; Protein export [PATH:ko03060] Environmental Information Processing; Membrane Transport; Secretion system [BR:ko02044]	hypothetical protein SORBIDRAFT_10g009280 [Sorghum bicolor] gb|EER89550.1| hypothetical protein SORBIDRAFT_10g009280 [Sorghum bicolor]	Phyllostachys edulis cDNA clone: bbasst002c07, full insert sequence	Signal recognition particle 9 kDa protein OS=Zea mays GN=SRP9 PE=3 SV=1	Signal recognition particle 9 kDa protein OS=Sorghum bicolor GN=Sb10g009280 PE=3 SV=1
Munro_Bamboo_unigene_BMK_360; 1; bphylf031e19; 1	Ribosomal protein L20A (L18A)	Translation, ribosomal structure and biogenesis		--	--	Os01g0666900; K02882 large subunit ribosomal protein L18Ae	Genetic Information Processing; Translation; Ribosome [PATH:ko03010] Genetic Information Processing; Translation; Ribosome [BR:ko03011]	Os01g0666900 [Oryza sativa Japonica Group] gb|EEC71234.1| hypothetical protein OsI_03189 [Oryza sativa Indica Group] dbj|BAF05719.2| Os01g0666900 [Oryza sativa Japonica Group]	Phyllostachys edulis cDNA clone: bphylf031e19, full insert sequence	60S ribosomal protein L18a OS=Castanea sativa GN=RPL18A PE=2 SV=1	Os01g0666900 protein OS=Oryza sativa subsp. japonica GN=Os01g0666900 PE=4 SV=1
Munro_Bamboo_unigene_BMK_36047; 1; bphylf061d01; -1	--	--	--	--	--	--	--	Phyllostachys edulis cDNA clone: bphylf061d01, full insert sequence	--	--
Munro_Bamboo_unigene_BMK_36414; 1; bphyst034j12; 1	Peptidyl-prolyl cis-trans isomerase (rotamase) - cyclophilin family	Posttranslational modification, protein turnover, chaperones		Biological Process: protein folding (GO:0006457);; Molecular Function: peptidyl-prolyl cis-trans isomerase activity (GO:0003755);	IPR002130: Peptidyl-prolyl cis-trans isomerase, cyclophilin-type; IPR015891: Cyclophilin-like	Os03g0811600; K09567 peptidyl-prolyl isomerase H (cyclophilin H) [EC:5.2.1.8]	Genetic Information Processing; Transcription; Spliceosome [PATH:ko03040] Genetic Information Processing; Transcription; Spliceosome [BR:ko03041] Genetic Information Processing; Folding, Sorting and Degradation; Chaperones and folding catalysts [BR:ko03110]	Os03g0811600 [Oryza sativa Japonica Group] gb|AAP73848.1| putative cyclophilin [Oryza sativa Japonica Group] gb|ABF18677.1| cyclophilin3B [Oryza sativa Indica Group] gb|ABF99496.1| Peptidyl-prolyl cis-trans isomerase H, putative, expressed [Oryza sativa Japonica Group] dbj|BAF13587.1| Os03g0811600 [Oryza sativa Japonica Group] dbj|BAG92294.1| unnamed protein product [Oryza sativa Japonica Group]	Phyllostachys edulis cDNA clone: bphyst034j12, full insert sequence	Peptidyl-prolyl cis-trans isomerase H OS=Rhizopus oryzae GN=cyp7 PE=3 SV=1	Peptidyl-prolyl cis-trans isomerase OS=Oryza sativa subsp. japonica GN=OSJNBb0033J23.12 PE=2 SV=1
Munro_Bamboo_unigene_BMK_36538; 1; bphylf045l07; 1	--	--	Biological Process: transmembrane transport (GO:0055085);; Cellular Component: integral to membrane (GO:0016021);	IPR004776: Auxin efflux carrier	Os09g0554300; K07088	Unclassified; Poorly Characterized; General function prediction only	unnamed protein product [Oryza sativa Japonica Group]	Phyllostachys edulis cDNA clone: bphylf045l07, full insert sequence	--	Os09g0554300 protein OS=Oryza sativa subsp. japonica GN=Os09g0554300 PE=4 SV=1
Munro_Bamboo_unigene_BMK_36620; 1; bphylf033f02; -1; bphyst003d24; -1; bpst40101e10; -1	--	--	--	--	Os04g0496300	--	H0306B06.4 [Oryza sativa Indica Group]	Phyllostachys edulis cDNA clone: bphyst003d24, full insert sequence	Serine/arginine repetitive matrix protein 2 OS=Homo sapiens GN=SRRM2 PE=1 SV=2	OSJNBa0067K08.8 protein OS=Oryza sativa subsp. japonica GN=OSJNBa0067K08.8 PE=2 SV=2
Munro_Bamboo_unigene_BMK_36669; 1; bphyst003b03; -1	--	--	--	--	hypothetical protein	--	hypothetical protein SORBIDRAFT_01g032220 [Sorghum bicolor] gb|EER94679.1| hypothetical protein SORBIDRAFT_01g032220 [Sorghum bicolor]	Phyllostachys edulis cDNA clone: bphyst003b03, full insert sequence	Membrane-anchored ubiquitin-fold protein 1 OS=Oryza sativa subsp. japonica GN=MUB1 PE=3 SV=1	Putative uncharacterized protein Sb01g032220 OS=Sorghum bicolor GN=Sb01g032220 PE=4 SV=1
Munro_Bamboo_unigene_BMK_36762; 1; bphyem205c02; 1	Predicted oxidoreductases (related to aryl-alcohol dehydrogenases)	Energy production and conversion		--	--	hypothetical protein	--	hypothetical protein SORBIDRAFT_10g001900 [Sorghum bicolor] gb|EER87770.1| hypothetical protein SORBIDRAFT_10g001900 [Sorghum bicolor]	Phyllostachys edulis cDNA clone: bphyem120k11, full insert sequence	IN2-2 protein OS=Zea mays GN=IN2-2 PE=2 SV=1	Putative uncharacterized protein Sb10g001900 OS=Sorghum bicolor GN=Sb10g001900 PE=4 SV=1
Munro_Bamboo_unigene_BMK_36936; 1; bphylf034m03; 1; bphyst011h23; 1	--	--	--	IPR006461: Uncharacterised protein family Cys-rich	hypothetical protein	--	DUF614 containing protein [Brachypodium distachyon]	Phyllostachys edulis cDNA clone: bphyst011h23, full insert sequence	--	DUF614 containing protein OS=Brachypodium distachyon PE=4 SV=1
Munro_Bamboo_unigene_BMK_37; 1; bphyst007d02; -1	Ribosomal protein S10E	Translation, ribosomal structure and biogenesis		--	IPR005326: Plectin/S10, N-terminal	Os04g0430100	--	Os02g0549600 [Oryza sativa Japonica Group] ref|NP_001052816.1| Os04g0430100 [Oryza sativa Japonica Group] sp|Q9AYP4.2|RS10_ORYSJ RecName: Full=40S ribosomal protein S10 emb|CAD41005.1| OSJNBa0042L16.19 [Oryza sativa Japonica Group] dbj|BAD16194.1| 40S ribosomal protein S10 [Oryza sativa Japonica Group] dbj|BAD33256.1| 40S ribosomal protein S10 [Oryza sativa Japonica Group] dbj|BAF09002.1| Os02g0549600 [Oryza sativa Japonica Group] dbj|BAF14730.1| Os04g0430100 [Oryza sativa Japonica Group] emb|CAH66395.1| B0222C05.3 [Oryza sativa Indica Group] gb|EAZ23393.1| hypothetical protein OsJ_07087 [Oryza sativa Japonica Group] gb|EAZ30777.1| hypothetical protein OsJ_14842 [Oryza sativa Japonica Group] dbj|BAG90032.1| unnamed protein product [Oryza sativa Japonica Group] gb|EEC73370.1| hypothetical protein OsI_07603 [Oryza sativa Indica Group] gb|EEC77291.1| hypothetical protein OsI_15930 [Oryza sativa Indica Group]	Phyllostachys edulis cDNA clone: bphyst007d02, full insert sequence	40S ribosomal protein S10 OS=Oryza sativa subsp. japonica GN=RPS10 PE=2 SV=2	40S ribosomal protein S10 OS=Oryza sativa subsp. japonica GN=OSJNBa0040I22.20 PE=2 SV=1
Munro_Bamboo_unigene_BMK_37021; 1; bphylf034o16; -1; bphyst016c12; -1; bphyst023p09; -1	Integral membrane protein, interacts with FtsH	General function prediction only		Biological Process: negative regulation of apoptosis (GO:0043066);; Cellular Component: integral to membrane (GO:0016021);	IPR006213: Bax inhibitor 1, conserved site; IPR006214: Inhibitor of apoptosis-promoting Bax1-related	hypothetical protein	--	hypothetical protein SORBIDRAFT_10g000210 [Sorghum bicolor] gb|EER89024.1| hypothetical protein SORBIDRAFT_10g000210 [Sorghum bicolor]	Phyllostachys edulis cDNA clone: bphyst023p09, full insert sequence	Bax inhibitor 1 OS=Oryza sativa subsp. japonica GN=BI1 PE=2 SV=1	Putative uncharacterized protein Sb10g000210 OS=Sorghum bicolor GN=Sb10g000210 PE=4 SV=1
Munro_Bamboo_unigene_BMK_3703; 1; bphylf045n15; 1; bphylf045n16; 1	Uncharacterized enzymes related to aldose 1-epimerase	Carbohydrate transport and metabolism		Biological Process: carbohydrate metabolic process (GO:0005975);; Molecular Function: carbohydrate binding (GO:0030246);	Molecular Function: catalytic activity (GO:0003824);	Molecular Function: isomerase activity (GO:0016853);	IPR008183: Aldose 1-epimerase; IPR011013: Glycoside hydrolase-type carbohydrate-binding	IPR014718: Glycoside hydrolase-type carbohydrate-binding, subgroup	Os04g0658000; K01792 glucose-6-phosphate 1-epimerase [EC:5.1.3.15]	Metabolism; Carbohydrate Metabolism; Glycolysis / Gluconeogenesis [PATH:ko00010]	Os04g0658000 [Oryza sativa Japonica Group] gb|AAL87174.1|AF480497_2 putative apospory-associated protein C [Oryza sativa Japonica Group] emb|CAE04231.2| OSJNBa0011F23.4 [Oryza sativa Japonica Group] dbj|BAF16040.1| Os04g0658000 [Oryza sativa Japonica Group] gb|EAZ32267.1| hypothetical protein OsJ_16471 [Oryza sativa Japonica Group] dbj|BAG92396.1| unnamed protein product [Oryza sativa Japonica Group]	Phyllostachys edulis cDNA clone: bphylf045n15, full insert sequence	Putative glucose-6-phosphate 1-epimerase OS=Cenchrus ciliaris PE=2 SV=1	OSJNBa0011F23.4 protein OS=Oryza sativa subsp. japonica GN=24K23.3 PE=2 SV=1
Munro_Bamboo_unigene_BMK_37132; 1; bphyem211k12; -1	--	--	--	--	hypothetical protein	--	Os12g0150200 [Oryza sativa Japonica Group] dbj|BAF29185.2| Os12g0150200 [Oryza sativa Japonica Group]	Phyllostachys edulis cDNA clone: bphyem211k12, full insert sequence	Cytochrome P450 (Fragment) OS=Helianthus annuus PE=1 SV=1	Cytochrome P450 family protein, expressed OS=Oryza sativa subsp. japonica GN=LOC_Os12g05440 PE=2 SV=1
Munro_Bamboo_unigene_BMK_37369; 1; bphylf025l07; 1	--	--	--	IPR007877: Protein of unknown function DUF707	hypothetical protein	--	hypothetical protein SORBIDRAFT_03g043920 [Sorghum bicolor] gb|EES01963.1| hypothetical protein SORBIDRAFT_03g043920 [Sorghum bicolor]	Phyllostachys edulis cDNA clone: bphylf025l07, full insert sequence	--	Putative uncharacterized protein Sb03g043920 OS=Sorghum bicolor GN=Sb03g043920 PE=4 SV=1
Munro_Bamboo_unigene_BMK_37435; 1; bphylf058a18; -1	--	--	--	--	hypothetical protein	--	hypothetical protein SORBIDRAFT_03g012970 [Sorghum bicolor] gb|EES00668.1| hypothetical protein SORBIDRAFT_03g012970 [Sorghum bicolor]	Phyllostachys edulis cDNA clone: bphylf058a18, full insert sequence	--	Putative uncharacterized protein Sb03g012970 OS=Sorghum bicolor GN=Sb03g012970 PE=4 SV=1
Munro_Bamboo_unigene_BMK_375; 1; bphylf051a01; 1	--	--	--	--	hypothetical protein	--	hypothetical protein SORBIDRAFT_01g034550 [Sorghum bicolor] gb|EER92224.1| hypothetical protein SORBIDRAFT_01g034550 [Sorghum bicolor]	Phyllostachys edulis cDNA clone: bphylf051a01, full insert sequence	--	Putative uncharacterized protein Sb01g034550 OS=Sorghum bicolor GN=Sb01g034550 PE=4 SV=1
Munro_Bamboo_unigene_BMK_37553; 1; bphyst013o11; -1	--	--	Biological Process: regulation of transcription, DNA-dependent (GO:0006355);; Molecular Function: DNA binding (GO:0003677);	Molecular Function: protein binding (GO:0005515);	Molecular Function: sequence-specific DNA binding (GO:0043565);	Molecular Function: sequence-specific DNA binding transcription factor activity (GO:0003700);	IPR001356: Homeobox; IPR009057: Homeodomain-like	IPR012287: Homeodomain-related	hypothetical protein	--	hypothetical protein SORBIDRAFT_10g023400 [Sorghum bicolor] gb|EER88607.1| hypothetical protein SORBIDRAFT_10g023400 [Sorghum bicolor]	Phyllostachys edulis cDNA clone: bphyst013o11, full insert sequence	Uncharacterized protein DDB_G0271670 OS=Dictyostelium discoideum GN=DDB_G0271670 PE=4 SV=1	Putative uncharacterized protein Sb10g023400 OS=Sorghum bicolor GN=Sb10g023400 PE=3 SV=1
Munro_Bamboo_unigene_BMK_37761; 1; bphylf028h16; -1	Catalase (peroxidase I)	Inorganic ion transport and metabolism		Biological Process: oxidation-reduction process (GO:0055114);; Biological Process: response to oxidative stress (GO:0006979);	Molecular Function: heme binding (GO:0020037);	Molecular Function: peroxidase activity (GO:0004601);	IPR002016: Haem peroxidase, plant/fungal/bacterial; IPR002207: Plant ascorbate peroxidase	IPR010255: Haem peroxidase	IPR019793: Peroxidases heam-ligand binding site	IPR019794: Peroxidase, active site	Os08g0549100; K00434 L-ascorbate peroxidase [EC:1.11.1.11]	Metabolism; Carbohydrate Metabolism; Ascorbate and aldarate metabolism [PATH:ko00053] Metabolism; Metabolism of Other Amino Acids; Glutathione metabolism [PATH:ko00480]	Os08g0549100 [Oryza sativa Japonica Group] sp|Q6ZJJ1.1|APX4_ORYSJ RecName: Full=Probable L-ascorbate peroxidase 4; AltName: Full=OsAPx04 dbj|BAD08951.1| putative peroxisome type ascorbate peroxidase [Oryza sativa Japonica Group] dbj|BAF24353.1| Os08g0549100 [Oryza sativa Japonica Group] gb|EAZ07905.1| hypothetical protein OsI_30161 [Oryza sativa Indica Group] dbj|BAG92166.1| unnamed protein product [Oryza sativa Japonica Group]	Phyllostachys edulis cDNA clone: bphylf028h16, full insert sequence	Probable L-ascorbate peroxidase 4 OS=Oryza sativa subsp. japonica GN=APX4 PE=2 SV=1	Os08g0549100 protein OS=Oryza sativa subsp. japonica GN=Os08g0549100 PE=2 SV=1
Munro_Bamboo_unigene_BMK_37911; 1; Munro_Bamboo_unigene_BMK_6484; 1; bphyem206f15; 1	--	--	Biological Process: lipid metabolic process (GO:0006629);; Molecular Function: hydrolase activity, acting on ester bonds (GO:0016788);	IPR001087: Lipase, GDSL	Os05g0419800	--	Os05g0419800 [Oryza sativa Japonica Group] gb|AAV25648.1| unknown protein [Oryza sativa Japonica Group] dbj|BAF17488.1| Os05g0419800 [Oryza sativa Japonica Group] dbj|BAG94851.1| unnamed protein product [Oryza sativa Japonica Group]	Phyllostachys edulis cDNA clone: bphyem206f15, full insert sequence	GDSL esterase/lipase At1g71691 OS=Arabidopsis thaliana GN=At1g71691 PE=2 SV=1	Os05g0419800 protein OS=Oryza sativa subsp. japonica GN=P0426G01.13 PE=2 SV=1
Munro_Bamboo_unigene_BMK_37919; 1; bphyem207g19; 1	--	--	--	--	Os08g0428400; K13464 jasmonate ZIM domain-containing protein	Environmental Information Processing; Signal Transduction; Plant hormone signal transduction [PATH:ko04075] Organismal Systems; Environmental Adaptation; Plant-pathogen interaction [PATH:ko04626]	hypothetical protein OsI_29310 [Oryza sativa Indica Group]	Phyllostachys edulis cDNA clone: bphyem207g19, full insert sequence	--	Os08g0428400 protein OS=Oryza sativa subsp. japonica GN=OJ1663_D06.22 PE=4 SV=1
Munro_Bamboo_unigene_BMK_380; 1; bphylf024h24; 1	--	--	--	--	Os02g0104200	--	Os02g0104200 [Oryza sativa Japonica Group] dbj|BAD06274.1| unknown protein [Oryza sativa Japonica Group] dbj|BAD07534.1| unknown protein [Oryza sativa Japonica Group] dbj|BAF07525.1| Os02g0104200 [Oryza sativa Japonica Group] dbj|BAH00678.1| unnamed protein product [Oryza sativa Japonica Group] gb|EEC72300.1| hypothetical protein OsI_05478 [Oryza sativa Indica Group] gb|EEE56136.1| hypothetical protein OsJ_05014 [Oryza sativa Japonica Group]	Phyllostachys edulis cDNA clone: bphylf024h24, full insert sequence	--	Os02g0104200 protein OS=Oryza sativa subsp. japonica GN=OJA1212_C06.5 PE=2 SV=1
Munro_Bamboo_unigene_BMK_38016; 1; bphylf026b20; -1	Predicted dioxygenase	General function prediction only		--	IPR002737: UPF0103/Mediator of ErbB2-driven cell motility (Memo-related)	Os08g0299000; K06990	Unclassified; Poorly Characterized; General function prediction only	unknown protein [Oryza sativa Indica Group]	Phyllostachys edulis cDNA clone: bphylf026b20, full insert sequence	Protein MEMO1 OS=Xenopus tropicalis GN=memo1 PE=2 SV=1	Putative uncharacterized protein K0048F05.15 OS=Oryza sativa subsp. indica GN=K0048F05.15 PE=4 SV=1
Munro_Bamboo_unigene_BMK_38028; 1; bphylf059d01; 1	Myb superfamily proteins, including transcription factors and mRNA splicing factors	--		--	--	hypothetical protein; K09422 myb proto-oncogene protein, plant	Genetic Information Processing; Transcription; Transcription factors [BR:ko03000]	hypothetical protein SORBIDRAFT_03g012550 [Sorghum bicolor] gb|EES00641.1| hypothetical protein SORBIDRAFT_03g012550 [Sorghum bicolor]	Phyllostachys edulis cDNA clone: bphylf059d01, full insert sequence	Myb-related protein P OS=Zea mays GN=P PE=2 SV=1	Putative uncharacterized protein Sb03g012550 OS=Sorghum bicolor GN=Sb03g012550 PE=4 SV=1
Munro_Bamboo_unigene_BMK_38057; 1; Munro_Bamboo_unigene_BMK_39686; 1; Munro_Bamboo_unigene_BMK_51518; 1; bphylf057o02; -1	--	--	--	--	hypothetical protein LOC100382649	--	hypothetical protein OsJ_00935 [Oryza sativa Japonica Group]	Phyllostachys edulis cDNA clone: bphylf057o02, full insert sequence	Probable inactive receptor kinase At5g53320 OS=Arabidopsis thaliana GN=At5g53320 PE=1 SV=1	Putative receptor-like kinase OS=Oryza sativa subsp. japonica GN=P0417G05.18 PE=4 SV=1
Munro_Bamboo_unigene_BMK_38074; 1; bphyem201k07; -1; bphyem209d01; -1	Uncharacterized enzymes related to aldose 1-epimerase	Carbohydrate transport and metabolism		Biological Process: carbohydrate metabolic process (GO:0005975);; Molecular Function: carbohydrate binding (GO:0030246);	Molecular Function: catalytic activity (GO:0003824);	Molecular Function: isomerase activity (GO:0016853);	IPR008183: Aldose 1-epimerase; IPR011013: Glycoside hydrolase-type carbohydrate-binding	IPR014718: Glycoside hydrolase-type carbohydrate-binding, subgroup	hypothetical protein; K01792 glucose-6-phosphate 1-epimerase [EC:5.1.3.15]	Metabolism; Carbohydrate Metabolism; Glycolysis / Gluconeogenesis	hypothetical protein OsI_17276 [Oryza sativa Indica Group]	Phyllostachys edulis cDNA clone: bphyem201k07, full insert sequence	Putative glucose-6-phosphate 1-epimerase OS=Cenchrus ciliaris PE=2 SV=1	OSJNBa0041A02.19 protein OS=Oryza sativa subsp. japonica GN=OSJNBa0041A02.19 PE=4 SV=2
Munro_Bamboo_unigene_BMK_38112; 1; Munro_Bamboo_unigene_BMK_47948; -1; bphylf045g01; 1	--	--	Biological Process: oxidation-reduction process (GO:0055114);; Biological Process: response to oxidative stress (GO:0006979);	Molecular Function: heme binding (GO:0020037);	Molecular Function: peroxidase activity (GO:0004601);	IPR000823: Plant peroxidase; IPR002016: Haem peroxidase, plant/fungal/bacterial	IPR010255: Haem peroxidase	Os10g0536700	--	hypothetical protein OsI_34475 [Oryza sativa Indica Group]	Phyllostachys edulis cDNA clone: bphylf045g01, full insert sequence	Basic peroxidase OS=Zinnia elegans GN=POD3 PE=1 SV=1	Class III peroxidase 128 OS=Oryza sativa subsp. japonica GN=OSJNBb0060I05.5 PE=4 SV=1
Munro_Bamboo_unigene_BMK_38149; 1; bphyem114b24; 1; bphylf039i12; 1; bphylf051l20; 1; bphyst016j22; 1	GTPase SAR1 and related small G proteins	General function prediction only		Biological Process: GTP catabolic process (GO:0006184);; Biological Process: protein transport (GO:0015031);	Biological Process: signal transduction (GO:0007165);	Biological Process: small GTPase mediated signal transduction (GO:0007264);	Cellular Component: intracellular (GO:0005622);	Cellular Component: membrane (GO:0016020);	Molecular Function: GTP binding (GO:0005525);	Molecular Function: GTPase activity (GO:0003924);	IPR001806: Small GTPase superfamily; IPR003578: Small GTPase superfamily, Rho type	IPR003579: Small GTPase superfamily, Rab type	IPR005225: Small GTP-binding protein domain	IPR020849: Small GTPase superfamily, Ras type	rop9; Rho-related protein from plants 9	--	Os02g0120800 [Oryza sativa Japonica Group] ref|NP_001105197.1| Rho-related protein from plants 9 [Zea mays] ref|XP_002453210.1| hypothetical protein SORBIDRAFT_04g001690 [Sorghum bicolor] sp|Q6ZHA3.1|RAC6_ORYSJ RecName: Full=Rac-like GTP-binding protein 6; AltName: Full=GTPase protein RacB; AltName: Full=OsRac6; Flags: Precursor gb|AAF91343.1|AF250327_1 small GTP-binding protein RACBP [Oryza sativa] gb|AAO41289.1| putative ROP family GTPase ROP9 [Zea mays] gb|AAO41290.1| putative ROP family GTPase ROP9 [Zea mays] dbj|BAD08136.1| small GTP-binding protein RACBP [Oryza sativa Japonica Group] dbj|BAD07596.1| small GTP-binding protein RACBP [Oryza sativa Japonica Group] gb|AAT84075.1| small GTP-binding protein RacB [Oryza sativa] dbj|BAF07626.1| Os02g0120800 [Oryza sativa Japonica Group] dbj|BAG91434.1| unnamed protein product [Oryza sativa Japonica Group] dbj|BAG94793.1| unnamed protein product [Oryza sativa Japonica Group] gb|EEE56200.1| hypothetical protein OsJ_05161 [Oryza sativa Japonica Group] gb|EES06186.1| hypothetical protein SORBIDRAFT_04g001690 [Sorghum bicolor]	Phyllostachys edulis cDNA clone: bphyem114b24, full insert sequence	Rac-like GTP-binding protein 6 OS=Oryza sativa subsp. japonica GN=RAC6 PE=2 SV=1	Putative ROP family GTPase ROP9 OS=Zea mays PE=2 SV=1
Munro_Bamboo_unigene_BMK_38274; 1; bphyem123k13; -1; bphyem206i19; -1	Predicted membrane protein	Function unknown		Cellular Component: integral to membrane (GO:0016021);	IPR002794: Protein of unknown function DUF92, TMEM19	Os01g0507300	--	hypothetical protein OsI_02120 [Oryza sativa Indica Group]	Phyllostachys edulis cDNA clone: bphyem206i19, full insert sequence	Transmembrane protein 19 OS=Xenopus laevis GN=tmem19 PE=2 SV=1	Integral membrane protein-like OS=Oryza sativa subsp. japonica GN=OSJNBa0094H06.21 PE=2 SV=1
Munro_Bamboo_unigene_BMK_38336; 1; bphylf040f20; 1	--	--	--	--	hypothetical protein LOC100278440	--	hypothetical protein [Zea mays]	Phyllostachys edulis cDNA clone: bphylf040f20, full insert sequence	--	Putative uncharacterized protein OS=Zea mays PE=2 SV=1
Munro_Bamboo_unigene_BMK_3835; 1; bphylf028c11; -1	Serine/threonine protein phosphatase	Signal transduction mechanisms		--	--	hypothetical protein	--	hypothetical protein SORBIDRAFT_06g031490 [Sorghum bicolor] gb|EES13014.1| hypothetical protein SORBIDRAFT_06g031490 [Sorghum bicolor]	Phyllostachys edulis cDNA clone: bphylf028c11, full insert sequence	Probable protein phosphatase 2C 45 OS=Oryza sativa subsp. japonica GN=Os04g0659500 PE=2 SV=2	Putative uncharacterized protein Sb06g031490 OS=Sorghum bicolor GN=Sb06g031490 PE=3 SV=1
Munro_Bamboo_unigene_BMK_38393; 1; bphylf053k20; -1	Aspartate/tyrosine/aromatic aminotransferase	Amino acid transport and metabolism		Biological Process: biosynthetic process (GO:0009058);; Molecular Function: catalytic activity (GO:0003824);	Molecular Function: pyridoxal phosphate binding (GO:0030170);	Molecular Function: transferase activity, transferring nitrogenous groups (GO:0016769);	IPR004839: Aminotransferase, class I/classII; IPR015421: Pyridoxal phosphate-dependent transferase, major region, subdomain 1	IPR015424: Pyridoxal phosphate-dependent transferase, major domain	hypothetical protein	--	hypothetical protein SORBIDRAFT_09g021360 [Sorghum bicolor] gb|EES19586.1| hypothetical protein SORBIDRAFT_09g021360 [Sorghum bicolor]	Phyllostachys edulis cDNA clone: bphylf053k20, full insert sequence	Aspartate aminotransferase OS=Pinus pinaster GN=AAT PE=1 SV=1	Putative uncharacterized protein Sb09g021360 OS=Sorghum bicolor GN=Sb09g021360 PE=3 SV=1
Munro_Bamboo_unigene_BMK_38530; 1; bphyst002h07; 1	--	--	--	--	Os01g0925800; K04649 ubiquitin-conjugating enzyme (huntingtin interacting protein 2) [EC:6.3.2.19]	Genetic Information Processing; Folding, Sorting and Degradation; Ubiquitin mediated proteolysis  Genetic Information Processing; Folding, Sorting and Degradation; Ubiquitin system [BR:ko04121]	Os01g0925800 [Oryza sativa Japonica Group] dbj|BAB89662.1| putative ubiquitin conjugating enzyme [Oryza sativa Japonica Group] dbj|BAB92885.1| putative ubiquitin conjugating enzyme [Oryza sativa Japonica Group] dbj|BAF07173.1| Os01g0925800 [Oryza sativa Japonica Group] gb|EAY77049.1| hypothetical protein OsI_05005 [Oryza sativa Indica Group] gb|EAZ14687.1| hypothetical protein OsJ_04611 [Oryza sativa Japonica Group] dbj|BAG93414.1| unnamed protein product [Oryza sativa Japonica Group]	Phyllostachys edulis cDNA clone: bphyst002h07, full insert sequence	Ubiquitin-conjugating enzyme E2 27 OS=Arabidopsis thaliana GN=UBC27 PE=2 SV=1	Ubiquitin carrier protein OS=Oryza sativa subsp. japonica GN=P0482D04.9 PE=2 SV=1
Munro_Bamboo_unigene_BMK_38562; 1; bphyem210l03; 1	Serine/threonine protein phosphatase	Signal transduction mechanisms		Molecular Function: catalytic activity (GO:0003824);	IPR001932: Protein phosphatase 2C-like; IPR015655: Protein phosphatase 2C	Os04g0403701	--	hypothetical protein OsI_15760 [Oryza sativa Indica Group]	Phyllostachys edulis cDNA clone: bphyem210l03, full insert sequence	Probable protein phosphatase 2C 39 OS=Oryza sativa subsp. japonica GN=Os04g0403701 PE=2 SV=2	Putative uncharacterized protein OS=Oryza sativa subsp. indica GN=OsI_15760 PE=4 SV=1
Munro_Bamboo_unigene_BMK_38607; -1; Munro_Bamboo_unigene_BMK_48111; 1; bphyem204k19; 1	Predicted GTPase	General function prediction only		--	--	hypothetical protein	--	hypothetical protein SORBIDRAFT_05g027660 [Sorghum bicolor] gb|EES09047.1| hypothetical protein SORBIDRAFT_05g027660 [Sorghum bicolor]	Phyllostachys edulis cDNA clone: bphyem204k19, full insert sequence	GTP-binding protein 5 OS=Pongo abelii GN=GTPBP5 PE=2 SV=1	Putative uncharacterized protein Sb05g027660 OS=Sorghum bicolor GN=Sb05g027660 PE=4 SV=1
Munro_Bamboo_unigene_BMK_3866; 1; bphylf003h19; -1	--	--	Biological Process: retrograde vesicle-mediated transport, Golgi to ER (GO:0006890);; Cellular Component: COPI vesicle coat (GO:0030126);	Molecular Function: binding (GO:0005488);	Molecular Function: structural molecule activity (GO:0005198);	IPR006822: Coatomer, epsilon subunit; IPR011990: Tetratricopeptide-like helical	Os04g0612600	--	Os04g0612600 [Oryza sativa Japonica Group] sp|Q9MAX6.1|COPE1_ORYSJ RecName: Full=Coatomer subunit epsilon-1; AltName: Full=Epsilon-coat protein 1; Short=Epsilon-COP 1; AltName: Full=Epsilon1-COP dbj|BAA94966.1| epsilon1-COP [Oryza sativa Japonica Group] emb|CAE05205.3| OSJNBa0070C17.12 [Oryza sativa Japonica Group] dbj|BAF15761.1| Os04g0612600 [Oryza sativa Japonica Group] gb|EAZ31957.1| hypothetical protein OsJ_16130 [Oryza sativa Japonica Group] dbj|BAG93863.1| unnamed protein product [Oryza sativa Japonica Group] dbj|BAG96673.1| unnamed protein product [Oryza sativa Japonica Group] dbj|BAG87546.1| unnamed protein product [Oryza sativa Japonica Group] gb|EEC77982.1| hypothetical protein OsI_17362 [Oryza sativa Indica Group]	Phyllostachys edulis cDNA clone: bphylf003h19, full insert sequence	Coatomer subunit epsilon-1 OS=Oryza sativa subsp. japonica GN=COPE1 PE=2 SV=1	Putative uncharacterized protein OS=Oryza sativa subsp. indica GN=OsI_17362 PE=4 SV=1
Munro_Bamboo_unigene_BMK_38664; 1; bphylf059k23; -1	--	--	Biological Process: oxidation-reduction process (GO:0055114);; Molecular Function: copper ion binding (GO:0005507);	Molecular Function: oxidoreductase activity (GO:0016491);	IPR001117: Multicopper oxidase, type 1; IPR008972: Cupredoxin	IPR011706: Multicopper oxidase, type 2	IPR011707: Multicopper oxidase, type 3	hypothetical protein	--	hypothetical protein OsI_34261 [Oryza sativa Indica Group]	Phyllostachys edulis cDNA clone: bphylf059k23, full insert sequence	Monocopper oxidase-like protein SKU5 OS=Arabidopsis thaliana GN=SKU5 PE=1 SV=1	Putative uncharacterized protein OS=Oryza sativa subsp. indica GN=OsI_34261 PE=4 SV=1
Munro_Bamboo_unigene_BMK_3870; 1; bphyem204c22; -1; bphyem207i04; -1	--	--	Molecular Function: protein binding (GO:0005515);; Molecular Function: zinc ion binding (GO:0008270);	IPR001841: Zinc finger, RING-type; IPR013083: Zinc finger, RING/FYVE/PHD-type	IPR024766: Zinc finger, RING-H2-type	umc2668; LOC100191868	--	hypothetical protein OsI_36548 [Oryza sativa Indica Group]	Phyllostachys edulis cDNA clone: bphyem204c22, full insert sequence	E3 ubiquitin-protein ligase RHF2A OS=Arabidopsis thaliana GN=RHF2A PE=2 SV=1	Putative uncharacterized protein OS=Oryza sativa subsp. indica GN=OsI_36548 PE=4 SV=1
Munro_Bamboo_unigene_BMK_38744; 1; bphyst018e07; 1	--	--	--	--	Os05g0204600	--	hypothetical protein OsI_18832 [Oryza sativa Indica Group]	Phyllostachys edulis cDNA clone: bphyst018e07, full insert sequence	Probable salt tolerance-like protein At1g78600 OS=Arabidopsis thaliana GN=At1g78600 PE=1 SV=2	Os05g0204600 protein OS=Oryza sativa subsp. japonica GN=OSJNBa0015G13.14 PE=4 SV=1
Munro_Bamboo_unigene_BMK_38759; 1; bphyem125i19; 1	--	--	--	--	hypothetical protein	--	hypothetical protein OsI_02254 [Oryza sativa Indica Group]	Phyllostachys edulis cDNA clone: bphyem125i19, full insert sequence	--	Putative uncharacterized protein OS=Oryza sativa subsp. indica GN=OsI_02254 PE=4 SV=1
Munro_Bamboo_unigene_BMK_38885; 1; bphylf028e20; 1	NADPH:quinone reductase and related Zn-dependent oxidoreductases	--		--	--	quinone oxidoreductase-like protein At1g23740	--	quinone oxidoreductase-like protein At1g23740 [Zea mays] gb|ACG41966.1| quinone oxidoreductase-like protein At1g23740 [Zea mays]	Phyllostachys edulis cDNA clone: bphylf028e20, full insert sequence	Quinone oxidoreductase-like protein At1g23740, chloroplastic OS=Arabidopsis thaliana GN=At1g23740 PE=1 SV=2	Quinone oxidoreductase-like protein At1g23740 OS=Zea mays PE=2 SV=1
Munro_Bamboo_unigene_BMK_389; 1; bphyem212j09; -1	--	--	--	IPR004314: Glucoamylase, putatuve	Os07g0205500	--	Os07g0205500 [Oryza sativa Japonica Group] dbj|BAC83228.1| putative DD1A protein [Oryza sativa Japonica Group] dbj|BAF21062.1| Os07g0205500 [Oryza sativa Japonica Group] gb|EAZ03167.1| hypothetical protein OsI_25320 [Oryza sativa Indica Group] dbj|BAG96087.1| unnamed protein product [Oryza sativa Japonica Group]	Phyllostachys edulis cDNA clone: bphyem212j09, full insert sequence	--	Os07g0205500 protein OS=Oryza sativa subsp. japonica GN=OJ1119_B04.4 PE=2 SV=1
Munro_Bamboo_unigene_BMK_38918; 1; Munro_Bamboo_unigene_BMK_45153; 1; bphyem210h03; 1	--	--	--	--	hypothetical protein	--	hypothetical protein SORBIDRAFT_09g018500 [Sorghum bicolor] gb|EES18123.1| hypothetical protein SORBIDRAFT_09g018500 [Sorghum bicolor]	Phyllostachys edulis cDNA clone: bphyem210h03, full insert sequence	Serine/threonine-protein kinase PBS1 OS=Arabidopsis thaliana GN=PBS1 PE=1 SV=1	Putative uncharacterized protein Sb09g018500 OS=Sorghum bicolor GN=Sb09g018500 PE=4 SV=1
Munro_Bamboo_unigene_BMK_3898; 1; bphyst010f12; 1	Predicted esterase	General function prediction only		Cellular Component: cytoplasmic membrane-bounded vesicle (GO:0016023);; Molecular Function: S-formylglutathione hydrolase activity (GO:0018738);	Molecular Function: carboxylesterase activity (GO:0004091);	IPR000801: Putative esterase; IPR014186: S-formylglutathione hydrolase	Os01g0939700; K01070 S-formylglutathione hydrolase [EC:3.1.2.12]	Metabolism; Energy Metabolism; Methane metabolism [PATH:ko00680]	Os01g0939700 [Oryza sativa Japonica Group] dbj|BAD87610.1| putative S-formylglutathione hydrolase [Oryza sativa Japonica Group] dbj|BAF07265.1| Os01g0939700 [Oryza sativa Japonica Group] dbj|BAG92046.1| unnamed protein product [Oryza sativa Japonica Group] dbj|BAG87137.1| unnamed protein product [Oryza sativa Japonica Group]	Phyllostachys edulis cDNA clone: bphyst010f12, full insert sequence	S-formylglutathione hydrolase OS=Arabidopsis thaliana GN=SFGH PE=1 SV=2	Os01g0939700 protein OS=Oryza sativa subsp. japonica GN=B1150F11.18-1 PE=2 SV=1
Munro_Bamboo_unigene_BMK_39096; 1; bphylf027d02; 1	GTPase SAR1 and related small G proteins	General function prediction only		Biological Process: GTP catabolic process (GO:0006184);; Biological Process: intracellular protein transport (GO:0006886);	Biological Process: nucleocytoplasmic transport (GO:0006913);	Biological Process: protein transport (GO:0015031);	Biological Process: signal transduction (GO:0007165);	Biological Process: small GTPase mediated signal transduction (GO:0007264);	Cellular Component: intracellular (GO:0005622);	Cellular Component: membrane (GO:0016020);	Molecular Function: GTP binding (GO:0005525);	Molecular Function: GTPase activity (GO:0003924);	IPR001806: Small GTPase superfamily; IPR002041: Ran GTPase	IPR003578: Small GTPase superfamily, Rho type	IPR003579: Small GTPase superfamily, Rab type	IPR005225: Small GTP-binding protein domain	IPR020849: Small GTPase superfamily, Ras type	hypothetical protein	--	RecName: Full=Ras-related protein RGP1; AltName: Full=GTP-binding regulatory protein RGP1 dbj|BAD29646.1| putative ras-related GTP-binding protein [Oryza sativa Japonica Group] gb|EEE69346.1| hypothetical protein OsJ_28668 [Oryza sativa Japonica Group]	Phyllostachys edulis cDNA clone: bphylf027d02, full insert sequence	Ras-related protein RGP1 OS=Oryza sativa subsp. japonica GN=RGP1 PE=2 SV=2	Putative uncharacterized protein OS=Oryza sativa subsp. japonica GN=OsJ_28668 PE=3 SV=1
Munro_Bamboo_unigene_BMK_3911; 1; bphyst010e11; 1	--	--	--	IPR005645: Serine hydrolase FSH	Os04g0450100	--	Os04g0450100 [Oryza sativa Japonica Group] emb|CAD40830.1| OSJNBa0086B14.2 [Oryza sativa Japonica Group] dbj|BAF14850.1| Os04g0450100 [Oryza sativa Japonica Group] gb|EAZ30909.1| hypothetical protein OsJ_14990 [Oryza sativa Japonica Group]	Phyllostachys edulis cDNA clone: bphyst010e11, full insert sequence	UPF0483 protein AGAP003155 OS=Anopheles gambiae GN=AGAP003155 PE=3 SV=3	OSJNBa0086B14.2 protein OS=Oryza sativa subsp. japonica GN=OSJNBa0086B14.2 PE=4 SV=1
Munro_Bamboo_unigene_BMK_39126; 1; bphyst009l13; -1	Ribosomal protein L14E/L6E/L27E	Translation, ribosomal structure and biogenesis		--	--	Os04g0515300; K02875 large subunit ribosomal protein L14e	Genetic Information Processing; Translation; Ribosome  Genetic Information Processing; Translation; Ribosome [BR:ko03011]	Os04g0515300 [Oryza sativa Japonica Group] emb|CAE02348.2| OSJNBb0072M01.9 [Oryza sativa Japonica Group] emb|CAE01917.2| OSJNBb0070J16.13 [Oryza sativa Japonica Group] dbj|BAF15224.1| Os04g0515300 [Oryza sativa Japonica Group] emb|CAH67629.1| OSIGBa0140J09.10 [Oryza sativa Indica Group] dbj|BAG88215.1| unnamed protein product [Oryza sativa Japonica Group] dbj|BAH00581.1| unnamed protein product [Oryza sativa Japonica Group] gb|EEC77640.1| hypothetical protein OsI_16636 [Oryza sativa Indica Group] gb|EEE61336.1| hypothetical protein OsJ_15457 [Oryza sativa Japonica Group]	Phyllostachys edulis cDNA clone: bphyst009l13, full insert sequence	60S ribosomal protein L14-1 OS=Arabidopsis thaliana GN=RPL14A PE=2 SV=1	OSJNBb0070J16.13 protein OS=Oryza sativa subsp. japonica GN=OSJNBb0070J16.13 PE=2 SV=2
Munro_Bamboo_unigene_BMK_3919; 1; bphylf002b22; 1	Uncharacterized Zn ribbon-containing protein	General function prediction only		--	--	Os07g0631100	--	Os07g0631100 [Oryza sativa Japonica Group] sp|Q8LHP0.1|ELOF1_ORYSJ RecName: Full=Transcription elongation factor 1 homolog dbj|BAC10134.1| unknown protein [Oryza sativa Japonica Group] dbj|BAF22274.1| Os07g0631100 [Oryza sativa Japonica Group] gb|EAY85182.1| hypothetical protein OsI_06540 [Oryza sativa Indica Group] gb|EAZ40760.1| hypothetical protein OsJ_25233 [Oryza sativa Japonica Group]	Phyllostachys edulis cDNA clone: bphylf002b22, full insert sequence	Transcription elongation factor 1 homolog OS=Oryza sativa subsp. japonica GN=Os07g0631100 PE=3 SV=1	Os07g0631100 protein OS=Oryza sativa subsp. japonica GN=Os07g0631100 PE=4 SV=1
Munro_Bamboo_unigene_BMK_39306; 1; bphylf044h05; -1	--	--	Cellular Component: endoplasmic reticulum (GO:0005783);; Cellular Component: integral to membrane (GO:0016021);	Molecular Function: transferase activity, transferring hexosyl groups (GO:0016758);	IPR007873: Glycosyltransferase, ALG3	hypothetical protein; K03845 alpha-1,3-mannosyltransferase [EC:2.4.1.130]	Metabolism; Glycan Biosynthesis and Metabolism; Glycosyltransferases [BR:ko01003] Metabolism; Glycan Biosynthesis and Metabolism; N-Glycan biosynthesis [PATH:ko00510] Metabolism; Glycan Biosynthesis and Metabolism; Various types of N-glycan biosynthesis [PATH:ko00513]	hypothetical protein SORBIDRAFT_03g004440 [Sorghum bicolor] gb|EES00226.1| hypothetical protein SORBIDRAFT_03g004440 [Sorghum bicolor]	Phyllostachys edulis cDNA clone: bphylf044h05, full insert sequence	Dolichyl-P-Man:Man(5)GlcNAc(2)-PP-dolichyl mannosyltransferase OS=Mus musculus GN=Alg3 PE=2 SV=1	Putative uncharacterized protein Sb03g004440 OS=Sorghum bicolor GN=Sb03g004440 PE=4 SV=1
Munro_Bamboo_unigene_BMK_39311; 1; Munro_Bamboo_unigene_BMK_62465; 1; bphyem209b19; 1	--	--	Biological Process: fatty acid metabolic process (GO:0006631);; Biological Process: oxidation-reduction process (GO:0055114);	Molecular Function: acyl-[acyl-carrier-protein] desaturase activity (GO:0045300);	Molecular Function: oxidoreductase activity (GO:0016491);	Molecular Function: transition metal ion binding (GO:0046914);	IPR005067: Fatty acid desaturase, type 2; IPR009078: Ferritin/ribonucleotide reductase-like	IPR012348: Ribonucleotide reductase-related	hypothetical protein; K03921 acyl-[acyl-carrier-protein] desaturase [EC:1.14.19.2]	Metabolism; Lipid Metabolism; Fatty acid biosynthesis [PATH:ko00061] Metabolism; Lipid Metabolism; Biosynthesis of unsaturated fatty acids [PATH:ko01040] Metabolism; Lipid Metabolism; Lipid biosynthesis proteins [BR:ko01004]	hypothetical protein SORBIDRAFT_03g041700 [Sorghum bicolor] gb|EES01858.1| hypothetical protein SORBIDRAFT_03g041700 [Sorghum bicolor]	Phyllostachys edulis cDNA clone: bphyem209b19, full insert sequence	Acyl-[acyl-carrier-protein] desaturase 1, chloroplastic OS=Oryza sativa subsp. japonica GN=Os01g0880800 PE=2 SV=1	Putative uncharacterized protein Sb03g041700 OS=Sorghum bicolor GN=Sb03g041700 PE=4 SV=1
Munro_Bamboo_unigene_BMK_39322; 1; Munro_Bamboo_unigene_BMK_39900; 1; bphyem203m24; 1; bphylf038n05; 1	Tubulin	Cytoskeleton		Biological Process: GTP catabolic process (GO:0006184);; Biological Process: microtubule-based movement (GO:0007018);	Biological Process: microtubule-based process (GO:0007017);	Biological Process: protein polymerization (GO:0051258);	Cellular Component: microtubule (GO:0005874);	Cellular Component: protein complex (GO:0043234);	Molecular Function: GTP binding (GO:0005525);	Molecular Function: GTPase activity (GO:0003924);	Molecular Function: structural molecule activity (GO:0005198);	IPR000217: Tubulin; IPR002453: Beta tubulin	IPR003008: Tubulin/FtsZ, GTPase domain	IPR008280: Tubulin/FtsZ, C-terminal	IPR017975: Tubulin, conserved site	hypothetical protein LOC100383576; K07375 tubulin beta	Cellular Processes; Transport and Catabolism; Phagosome [PATH:ko04145] Cellular Processes; Cell Motility; Cytoskeleton proteins [BR:ko04812] Cellular Processes; Cell Communication; Gap junction [PATH:ko04540] Human Diseases; Infectious Diseases; Pathogenic Escherichia coli infection [PATH:ko05130]	beta-tubulin R2242-rice [Arabidopsis lyrata subsp. lyrata] gb|EFH57615.1| beta-tubulin R2242-rice [Arabidopsis lyrata subsp. lyrata]	Phyllostachys edulis cDNA clone: bphylf038n05, full insert sequence	Tubulin beta-7 chain OS=Oryza sativa subsp. japonica GN=TUBB7 PE=2 SV=2	Os03g0780600 protein OS=Oryza sativa subsp. japonica GN=Os03g0780600 PE=2 SV=1
Munro_Bamboo_unigene_BMK_3942; 1; bphylf059n02; 1; bphyst026b07; 1	--	--	--	--	Os01g0887700	--	hypothetical protein OsI_04717 [Oryza sativa Indica Group]	Phyllostachys edulis cDNA clone: bphyst026b07, full insert sequence	PHD finger protein At5g26210 OS=Arabidopsis thaliana GN=At5g26210 PE=1 SV=2	Nucleic acid binding protein OS=Oryza sativa GN=NBP PE=4 SV=1
Munro_Bamboo_unigene_BMK_39435; 1; bphyem108k20; 1	--	--	--	--	Os01g0935900	--	succinate dehydrogenase subunit 4 [Oryza sativa]	Phyllostachys edulis cDNA clone: bphyem108k20, full insert sequence	Uncharacterized mitochondrial protein ymf17 OS=Marchantia polymorpha GN=YMF17 PE=4 SV=1	Succinate dehydrogenase subunit 4 OS=Oryza sativa GN=sdh4 PE=4 SV=1
Munro_Bamboo_unigene_BMK_3954; 1; bphyem205l17; -1	--	--	Biological Process: protein folding (GO:0006457);; Cellular Component: endoplasmic reticulum (GO:0005783);	Molecular Function: calcium ion binding (GO:0005509);	Molecular Function: unfolded protein binding (GO:0051082);	IPR001580: Calreticulin/calnexin; IPR008985: Concanavalin A-like lectin/glucanase	IPR009033: Calreticulin/calnexin, P	IPR009169: Calreticulin	IPR013320: Concanavalin A-like lectin/glucanase, subgroup	IPR018124: Calreticulin/calnexin, conserved site	Os07g0246200; K08057 calreticulin	Genetic Information Processing; Folding, Sorting and Degradation; Chaperones and folding catalysts [BR:ko03110] Genetic Information Processing; Folding, Sorting and Degradation; Protein processing in endoplasmic reticulum [PATH:ko04141] Environmental Information Processing; Signaling Molecules and Interaction; Glycan bindng proteins [BR:ko04091] Cellular Processes; Transport and Catabolism; Phagosome [PATH:ko04145] Organismal Systems; Immune System; Antigen processing and presentation [PATH:ko04612] Human Diseases; Infectious Diseases; Chagas disease (American trypanosomiasis) [PATH:ko05142]	hypothetical protein OsI_25508 [Oryza sativa Indica Group]	Phyllostachys edulis cDNA clone: bphyem205l17, full insert sequence	Calreticulin OS=Oryza sativa subsp. japonica GN=Os07g0246200 PE=1 SV=2	Putative uncharacterized protein OS=Oryza sativa subsp. indica GN=OsI_25508 PE=3 SV=1
Munro_Bamboo_unigene_BMK_39633; 1; bphylf030b16; -1	--	--	Molecular Function: nucleic acid binding (GO:0003676);; Molecular Function: nucleotide binding (GO:0000166);	Molecular Function: zinc ion binding (GO:0008270);	IPR000504: RNA recognition motif domain; IPR000571: Zinc finger, CCCH-type	IPR012677: Nucleotide-binding, alpha-beta plait	Os06g0170500	--	Os06g0170500 [Oryza sativa Japonica Group] sp|Q5SNN4.1|C3H40_ORYSJ RecName: Full=Zinc finger CCCH domain-containing protein 40; Short=OsC3H40 dbj|BAD72175.1| RRM-containing RNA-binding protein-like [Oryza sativa Japonica Group] dbj|BAF18845.1| Os06g0170500 [Oryza sativa Japonica Group] gb|EAZ35976.1| hypothetical protein OsJ_20278 [Oryza sativa Japonica Group] dbj|BAG99980.1| unnamed protein product [Oryza sativa Japonica Group]	Phyllostachys edulis cDNA clone: bphylf030b16, full insert sequence	Zinc finger CCCH domain-containing protein 40 OS=Oryza sativa subsp. japonica GN=Os06g0170500 PE=2 SV=1	cDNA clone:J013067M02, full insert sequence OS=Oryza sativa subsp. japonica PE=2 SV=1
Munro_Bamboo_unigene_BMK_39690; 1; bphyem115b12; 1	--	--	--	--	Os04g0674000	--	hypothetical protein OsJ_16596 [Oryza sativa Japonica Group]	Phyllostachys edulis cDNA clone: bphyem115b12, full insert sequence	Uncharacterized 35.5 kDa protein in transposon Tn4556 OS=Streptomyces fradiae PE=4 SV=1	OSJNBa0018M05.6 protein OS=Oryza sativa subsp. japonica GN=OSJNBa0018M05.6 PE=2 SV=2
Munro_Bamboo_unigene_BMK_39719; 1; bphylf048o17; -1	Uroporphyrinogen-III decarboxylase	Coenzyme transport and metabolism		Biological Process: porphyrin-containing compound biosynthetic process (GO:0006779);; Molecular Function: uroporphyrinogen decarboxylase activity (GO:0004853);	IPR000257: Uroporphyrinogen decarboxylase (URO-D); IPR006361: Uroporphyrinogen decarboxylase HemE	Os03g0337600; K01599 uroporphyrinogen decarboxylase [EC:4.1.1.37]	Metabolism; Metabolism of Cofactors and Vitamins; Porphyrin and chlorophyll metabolism [PATH:ko00860]	Os03g0337600 [Oryza sativa Japonica Group] sp|Q10LR9.1|DCUP2_ORYSJ RecName: Full=Uroporphyrinogen decarboxylase 2, chloroplastic; Short=UPD2; Short=URO-D2; Flags: Precursor gb|ABF95829.1| Uroporphyrinogen decarboxylase, chloroplast precursor, putative, expressed [Oryza sativa Japonica Group] dbj|BAF11963.1| Os03g0337600 [Oryza sativa Japonica Group] gb|EEE59019.1| hypothetical protein OsJ_10762 [Oryza sativa Japonica Group]	Phyllostachys edulis cDNA clone: bphylf048o17, full insert sequence	Uroporphyrinogen decarboxylase 2, chloroplastic OS=Oryza sativa subsp. japonica GN=Os03g0337600 PE=3 SV=1	Uroporphyrinogen decarboxylase OS=Sorghum bicolor GN=Sb01g036030 PE=3 SV=1
Munro_Bamboo_unigene_BMK_39753; 1; bphyem204m05; -1	--	--	--	--	IDP52; LOC100272772	--	hypothetical protein LOC100272772 [Zea mays] gb|ACF84393.1| unknown [Zea mays] gb|ACR38548.1| unknown [Zea mays]	Phyllostachys edulis cDNA clone: bphyem204m05, full insert sequence	Monodehydroascorbate reductase, chloroplastic OS=Arabidopsis thaliana GN=At1g63940 PE=2 SV=3	Putative uncharacterized protein OS=Zea mays PE=2 SV=1
Munro_Bamboo_unigene_BMK_39850; 1; bphylf030b18; 1	--	--	--	--	Os12g0171200	--	hypothetical protein OsJ_35375 [Oryza sativa Japonica Group]	Phyllostachys edulis cDNA clone: bphylf030b18, full insert sequence	--	TRNA-nucleotidyltransferase, putative, expressed OS=Oryza sativa subsp. japonica GN=LOC_Os12g07350 PE=3 SV=1
Munro_Bamboo_unigene_BMK_39971; 1; bphylf027g15; -1	--	--	--	--	hypothetical protein	--	hypothetical protein SORBIDRAFT_10g030180 [Sorghum bicolor] gb|EER90395.1| hypothetical protein SORBIDRAFT_10g030180 [Sorghum bicolor]	Sorghum bicolor hypothetical protein, mRNA	Magnesium transporter NIPA4 OS=Homo sapiens GN=NIPAL4 PE=1 SV=3	Putative uncharacterized protein Sb10g030180 OS=Sorghum bicolor GN=Sb10g030180 PE=4 SV=1
Munro_Bamboo_unigene_BMK_40056; 1; bphylf026o04; 1	--	--	--	--	hypothetical protein	--	GA2-oxidase [Ehrharta erecta]	Phyllostachys edulis cDNA clone: bphylf026o04, full insert sequence	Gibberellin 2-beta-dioxygenase OS=Phaseolus coccineus GN=GA2OX1 PE=2 SV=1	GA2-oxidase (Fragment) OS=Ehrharta erecta GN=GA2ox4 PE=4 SV=1
Munro_Bamboo_unigene_BMK_40061; 1; bphyem208k01; -1	Serine/threonine protein kinase	--		--	--	hypothetical protein	--	serine/threonine-protein kinase [Cucumis melo subsp. melo]	Phyllostachys edulis cDNA clone: bphyem208k01, full insert sequence	Probable serine/threonine-protein kinase At1g54610 OS=Arabidopsis thaliana GN=At1g54610 PE=1 SV=1	Serine/threonine-protein kinase OS=Cucumis melo subsp. melo PE=4 SV=1
Munro_Bamboo_unigene_BMK_40068; 1; bphylf039d01; -1; bphylf046n17; -1	Homoserine kinase	Amino acid transport and metabolism		--	--	hypothetical protein; K00872 homoserine kinase [EC:2.7.1.39]	Metabolism; Amino Acid Metabolism; Glycine, serine and threonine metabolism [PATH:ko00260]	hypothetical protein SORBIDRAFT_04g038440 [Sorghum bicolor] gb|EES06074.1| hypothetical protein SORBIDRAFT_04g038440 [Sorghum bicolor]	Phyllostachys edulis cDNA clone: bphylf046n17, full insert sequence	Homoserine kinase OS=Chloroherpeton thalassium (strain ATCC 35110 / GB-78) GN=thrB PE=3 SV=1	Putative uncharacterized protein Sb04g038440 OS=Sorghum bicolor GN=Sb04g038440 PE=3 SV=1
Munro_Bamboo_unigene_BMK_401; 1; bphyem212e19; -1	Aspartyl/asparaginyl-tRNA synthetases	Translation, ribosomal structure and biogenesis		Biological Process: asparaginyl-tRNA aminoacylation (GO:0006421);; Biological Process: tRNA aminoacylation for protein translation (GO:0006418);	Cellular Component: cytoplasm (GO:0005737);	Molecular Function: ATP binding (GO:0005524);	Molecular Function: aminoacyl-tRNA ligase activity (GO:0004812);	Molecular Function: asparagine-tRNA ligase activity (GO:0004816);	Molecular Function: nucleic acid binding (GO:0003676);	Molecular Function: nucleotide binding (GO:0000166);	IPR000738: WHEP-TRS; IPR002312: Aspartyl/Asparaginyl-tRNA synthetase, class IIb	IPR004364: Aminoacyl-tRNA synthetase, class II (D/K/N)	IPR004365: Nucleic acid binding, OB-fold, tRNA/helicase-type	IPR004522: Asparaginyl-tRNA synthetase, class IIb	IPR006195: Aminoacyl-tRNA synthetase, class II	IPR009068: S15/NS1, RNA-binding	IPR012340: Nucleic acid-binding, OB-fold	IPR016027: Nucleic acid-binding, OB-fold-like	IPR018150: Aminoacyl-tRNA synthetase, class II (D/K/N)-like	Os01g0372700; K01893 asparaginyl-tRNA synthetase [EC:6.1.1.22]	Metabolism; Amino Acid Metabolism; Amino acid related enzymes [BR:ko01007] Genetic Information Processing; Translation; Aminoacyl-tRNA biosynthesis [PATH:ko00970]	Os01g0372700 [Oryza sativa Japonica Group] dbj|BAB61140.1| putative asparagine-tRNA ligase [Oryza sativa Japonica Group] dbj|BAB64053.1| putative asparagine-tRNA ligase [Oryza sativa Japonica Group] dbj|BAF04980.1| Os01g0372700 [Oryza sativa Japonica Group]	Phyllostachys edulis cDNA clone: bphyem212e19, full insert sequence	Asparaginyl-tRNA synthetase, cytoplasmic 1 OS=Arabidopsis thaliana GN=SYNC1 PE=2 SV=1	Os01g0372700 protein OS=Oryza sativa subsp. japonica GN=B1039D07.28 PE=3 SV=1
Munro_Bamboo_unigene_BMK_40106; 1; bphyst012o04; -1	--	--	--	--	--	--	--	Phyllostachys edulis cDNA clone: bphyst012o04, full insert sequence	--	--
Munro_Bamboo_unigene_BMK_4014; 1; bphylf033n12; 1; bphyst002f13; 1; bphyst333z24; 1	GTPase SAR1 and related small G proteins	General function prediction only		Biological Process: GTP catabolic process (GO:0006184);; Biological Process: intracellular protein transport (GO:0006886);	Biological Process: nucleocytoplasmic transport (GO:0006913);	Biological Process: protein transport (GO:0015031);	Biological Process: signal transduction (GO:0007165);	Biological Process: small GTPase mediated signal transduction (GO:0007264);	Cellular Component: intracellular (GO:0005622);	Cellular Component: membrane (GO:0016020);	Molecular Function: GTP binding (GO:0005525);	Molecular Function: GTPase activity (GO:0003924);	IPR001806: Small GTPase superfamily; IPR002041: Ran GTPase	IPR003578: Small GTPase superfamily, Rho type	IPR003579: Small GTPase superfamily, Rab type	IPR005225: Small GTP-binding protein domain	IPR020849: Small GTPase superfamily, Ras type	IPR024156: Small GTPase superfamily, ARF type	Os01g0558600; K07976 Rab family, other	Environmental Information Processing; Signaling Molecules and Interaction; GTP-binding proteins [BR:ko04031]	Os01g0558600 [Oryza sativa Japonica Group] sp|P40392.2|RIC1_ORYSJ RecName: Full=Ras-related protein RIC1 dbj|BAD87942.1| Ras-related protein RIC1 [Oryza sativa Japonica Group] dbj|BAD87657.1| Ras-related protein RIC1 [Oryza sativa Japonica Group] dbj|BAF05250.1| Os01g0558600 [Oryza sativa Japonica Group] gb|EAY74530.1| hypothetical protein OsI_02420 [Oryza sativa Indica Group] gb|EAZ12333.1| hypothetical protein OsJ_02222 [Oryza sativa Japonica Group] dbj|BAH01664.1| unnamed protein product [Oryza sativa Japonica Group]	Phyllostachys edulis cDNA clone: bphyst333z24, full insert sequence	Ras-related protein RIC1 OS=Oryza sativa subsp. japonica GN=RIC1 PE=2 SV=2	Os01g0558600 protein OS=Oryza sativa subsp. japonica GN=Os01g0558600 PE=2 SV=1
Munro_Bamboo_unigene_BMK_40160; 1; bphyem101b22; 1	Serine/threonine protein kinase	--		Biological Process: protein phosphorylation (GO:0006468);; Molecular Function: ATP binding (GO:0005524);	Molecular Function: protein kinase activity (GO:0004672);	Molecular Function: protein serine/threonine kinase activity (GO:0004674);	Molecular Function: protein tyrosine kinase activity (GO:0004713);	Molecular Function: transferase activity, transferring phosphorus-containing groups (GO:0016772);	IPR000719: Protein kinase, catalytic domain; IPR002290: Serine/threonine-protein kinase, catalytic  domain	IPR008271: Serine/threonine-protein kinase, active site	IPR011009: Protein kinase-like domain	IPR017441: Protein kinase, ATP binding site	IPR017442: Serine/threonine-protein kinase-like domain	IPR020635: Tyrosine-protein kinase, catalytic domain	Os01g0191800; K08850 aurora kinase, other [EC:2.7.11.1]	Metabolism; Enzyme Families; Protein kinases [BR:ko01001] Genetic Information Processing; Replication and Repair; Chromosome [BR:ko03036]	Os01g0191800 [Oryza sativa Japonica Group] dbj|BAD72229.1| putative protein kinase p46XlEg22 [Oryza sativa Japonica Group] dbj|BAD72232.1| putative protein kinase p46XlEg22 [Oryza sativa Japonica Group] dbj|BAF04188.1| Os01g0191800 [Oryza sativa Japonica Group] gb|EAZ10867.1| hypothetical protein OsJ_00707 [Oryza sativa Japonica Group] dbj|BAG87875.1| unnamed protein product [Oryza sativa Japonica Group] dbj|BAG95515.1| unnamed protein product [Oryza sativa Japonica Group]	Phyllostachys edulis cDNA clone: bphyem101b22, full insert sequence	Serine/threonine-protein kinase Aurora-1 OS=Arabidopsis thaliana GN=AUR1 PE=2 SV=1	Os01g0191800 protein OS=Oryza sativa subsp. japonica GN=P0671B11.4 PE=2 SV=1
Munro_Bamboo_unigene_BMK_40186; 1; bphyem204f19; -1	--	--	--	--	Os08g0104900	--	hypothetical protein OsJ_25746 [Oryza sativa Japonica Group]	Phyllostachys edulis cDNA clone: bphyem204f19, full insert sequence	UDP-galactose transporter 1 OS=Arabidopsis thaliana GN=UDP-GALT1 PE=2 SV=1	Os08g0104900 protein OS=Oryza sativa subsp. japonica GN=OJ1300_E01.7 PE=2 SV=1
Munro_Bamboo_unigene_BMK_40229; 1; bphyst026o06; 1	--	--	--	--	Os08g0237000; K08235 xyloglucan:xyloglucosyl transferase [EC:2.4.1.207]	Unclassified; Metabolism; Others	hypothetical protein OsJ_04071 [Oryza sativa Japonica Group]	Phyllostachys edulis cDNA clone: bphyst026o06, full insert sequence	Xyloglucan endotransglycosylase/hydrolase protein 8 OS=Oryza sativa subsp. japonica GN=XTH8 PE=1 SV=1	Os08g0237000 protein OS=Oryza sativa subsp. japonica GN=Os08g0237000 PE=2 SV=1
Munro_Bamboo_unigene_BMK_404; 1; bphylf044p04; 1	Ribosomal protein S3AE	Translation, ribosomal structure and biogenesis		Biological Process: translation (GO:0006412);; Cellular Component: intracellular (GO:0005622);	Cellular Component: ribosome (GO:0005840);	Molecular Function: structural constituent of ribosome (GO:0003735);	IPR001593: Ribosomal protein S3Ae; IPR018281: Ribosomal protein S3Ae, conserved site	hypothetical protein; K02984 small subunit ribosomal protein S3Ae	Genetic Information Processing; Translation; Ribosome [PATH:ko03010] Genetic Information Processing; Translation; Ribosome [BR:ko03011]	hypothetical protein SORBIDRAFT_02g038370 [Sorghum bicolor] gb|EER99659.1| hypothetical protein SORBIDRAFT_02g038370 [Sorghum bicolor]	Phyllostachys edulis cDNA clone: bphylf044p04, full insert sequence	40S ribosomal protein S3a OS=Oryza sativa subsp. japonica GN=RPS3A PE=2 SV=2	Putative uncharacterized protein Sb02g038370 OS=Sorghum bicolor GN=Sb02g038370 PE=3 SV=1
Munro_Bamboo_unigene_BMK_40433; 1; bphylf037i05; -1	--	--	Biological Process: fatty acid biosynthetic process (GO:0006633);; Biological Process: metabolic process (GO:0008152);	Cellular Component: membrane (GO:0016020);	Molecular Function: catalytic activity (GO:0003824);	Molecular Function: transferase activity, transferring acyl groups other than amino-acyl groups (GO:0016747);	IPR013601: FAE1/Type III polyketide synthase-like protein; IPR016038: Thiolase-like, subgroup	IPR016039: Thiolase-like	Os10g0472900	--	hypothetical protein OsJ_31866 [Oryza sativa Japonica Group]	Phyllostachys edulis cDNA clone: bphylf037i05, full insert sequence	3-ketoacyl-CoA synthase 21 OS=Arabidopsis thaliana GN=KCS21 PE=2 SV=1	3-ketoacyl-CoA synthase OS=Oryza sativa GN=OSJNBb0094K03.7 PE=3 SV=1
Munro_Bamboo_unigene_BMK_40486; 1; bphylf032a14; -1	--	--	--	--	--	--	--	Phyllostachys edulis cDNA clone: bphylf032a14, full insert sequence	--	--
Munro_Bamboo_unigene_BMK_4053; 1; bphyst008c21; 1; bphyst025d01; 1	Translation elongation factor EF-1alpha (GTPase)	Translation, ribosomal structure and biogenesis		--	--	Os03g0178000	--	Os03g0177400 [Oryza sativa Japonica Group] ref|NP_001049146.1| Os03g0177500 [Oryza sativa Japonica Group] ref|NP_001049147.1| Os03g0177900 [Oryza sativa Japonica Group] ref|NP_001049148.1| Os03g0178000 [Oryza sativa Japonica Group] sp|O64937.2|EF1A_ORYSJ RecName: Full=Elongation factor 1-alpha; Short=EF-1-alpha dbj|BAA23657.1| EF-1 alpha [Oryza sativa] dbj|BAA23659.1| EF-1 alpha [Oryza sativa] dbj|BAA23660.1| EF-1 alpha [Oryza sativa] gb|ABF94269.1| Elongation factor 1-alpha, putative [Oryza sativa Japonica Group] gb|ABF94270.1| Elongation factor 1-alpha, putative, expressed [Oryza sativa Japonica Group] gb|ABF94273.1| Elongation factor 1-alpha, putative, expressed [Oryza sativa Japonica Group] gb|ABF94274.1| Elongation factor 1-alpha, putative, expressed [Oryza sativa Japonica Group] dbj|BAF11059.1| Os03g0177400 [Oryza sativa Japonica Group] dbj|BAF11060.1| Os03g0177500 [Oryza sativa Japonica Group] dbj|BAF11061.1| Os03g0177900 [Oryza sativa Japonica Group] dbj|BAF11062.1| Os03g0178000 [Oryza sativa Japonica Group] gb|EAZ25788.1| hypothetical protein OsJ_09631 [Oryza sativa Japonica Group] gb|EAZ25791.1| hypothetical protein OsJ_09634 [Oryza sativa Japonica Group] gb|EAZ25792.1| hypothetical protein OsJ_09635 [Oryza sativa Japonica Group] dbj|BAG87945.1| unnamed protein product [Oryza sativa Japonica Group] dbj|BAG93078.1| unnamed protein product [Oryza sativa Japonica Group] dbj|BAG97075.1| unnamed protein product [Oryza sativa Japonica Group] gb|EEC74621.1| hypothetical protein OsI_10237 [Oryza sativa Indica Group] gb|EEC74622.1| hypothetical protein OsI_10241 [Oryza sativa Indica Group] gb|EEC74623.1| hypothetical protein OsI_10242 [Oryza sativa Indica Group] gb|ADM86871.1| elongation factor-1 alpha [Oryza sativa Japonica Group] gb|ADM86885.1| elongation factor-1 alpha [Oryza sativa Japonica Group] gb|ADM86886.1| elongation factor-1 alpha [Oryza sativa Japonica Group] gb|ADM86887.1| elongation factor-1 alpha [Oryza sativa Japonica Group]	Phyllostachys edulis cDNA clone: bphyst008c21, full insert sequence	Elongation factor 1-alpha OS=Oryza sativa subsp. japonica GN=REFA1 PE=2 SV=2	Elongation factor 1-alpha OS=Oryza sativa subsp. japonica GN=Os03g0178000 PE=2 SV=1
Munro_Bamboo_unigene_BMK_40675; 1; Munro_Bamboo_unigene_BMK_5607; 1; bphylf047a07; -1	Beta-glucosidase/6-phospho-beta-glucosidase/beta-galactosidase	Carbohydrate transport and metabolism		--	--	Os08g0509200	--	hypothetical protein OsJ_27884 [Oryza sativa Japonica Group]	Phyllostachys edulis cDNA clone: bphylf047a07, full insert sequence	Beta-glucosidase 27 OS=Oryza sativa subsp. japonica GN=BGLU27 PE=2 SV=1	Putative uncharacterized protein OS=Oryza sativa subsp. japonica GN=OsJ_27884 PE=3 SV=1
Munro_Bamboo_unigene_BMK_40778; 1; bphyst032o02; 1	--	--	Molecular Function: heat shock protein binding (GO:0031072);; Molecular Function: unfolded protein binding (GO:0051082);	IPR001305: Heat shock protein DnaJ, cysteine-rich domain	Os06g0332800	--	Os06g0332800 [Oryza sativa Japonica Group] dbj|BAD32898.1| putative bundle sheath defective protein [Oryza sativa Japonica Group] dbj|BAD32967.1| putative bundle sheath defective protein [Oryza sativa Japonica Group] dbj|BAF19462.1| Os06g0332800 [Oryza sativa Japonica Group] gb|EAZ00781.1| hypothetical protein OsI_22808 [Oryza sativa Indica Group] gb|EAZ36864.1| hypothetical protein OsJ_21207 [Oryza sativa Japonica Group] dbj|BAG87448.1| unnamed protein product [Oryza sativa Japonica Group]	Phyllostachys edulis cDNA clone: bphyst032o02, full insert sequence	--	Os06g0332800 protein OS=Oryza sativa subsp. japonica GN=P0531C01.26 PE=2 SV=1
Munro_Bamboo_unigene_BMK_4082; 1; bphylf026j03; 1	--	--	--	--	Os08g0492500	--	Os08g0492500 [Oryza sativa Japonica Group] dbj|BAD10011.1| zinc finger protein family-like [Oryza sativa Japonica Group] dbj|BAF24035.1| Os08g0492500 [Oryza sativa Japonica Group] gb|EAZ07455.1| hypothetical protein OsI_29711 [Oryza sativa Indica Group] dbj|BAG89464.1| unnamed protein product [Oryza sativa Japonica Group]	Phyllostachys edulis cDNA clone: bphylf026j03, full insert sequence	RING-H2 finger protein ATL43 OS=Arabidopsis thaliana GN=ATL43 PE=2 SV=2	Os08g0492500 protein OS=Oryza sativa subsp. japonica GN=P0686H11.17 PE=2 SV=1
Munro_Bamboo_unigene_BMK_4088; 1; bphylf028m13; 1	--	--	--	--	Os02g0250400	--	hypothetical protein OsI_06576 [Oryza sativa Indica Group]	Phyllostachys edulis cDNA clone: bphylf028m13, full insert sequence	GDSL esterase/lipase At5g45910 OS=Arabidopsis thaliana GN=At5g45910 PE=2 SV=1	Putative uncharacterized protein OS=Oryza sativa subsp. indica GN=OsI_06576 PE=4 SV=1
Munro_Bamboo_unigene_BMK_40934; 1; bphyem201a24; -1; bphyem204g09; -1; bphyem206o04; -1	Predicted alternative tryptophan synthase beta-subunit (paralog of TrpB)	General function prediction only		--	--	hypothetical protein; K06001 tryptophan synthase beta chain [EC:4.2.1.20]	Metabolism; Amino Acid Metabolism; Glycine, serine and threonine metabolism  Metabolism; Amino Acid Metabolism; Phenylalanine, tyrosine and tryptophan biosynthesis	hypothetical protein SORBIDRAFT_10g024680 [Sorghum bicolor] gb|EER90070.1| hypothetical protein SORBIDRAFT_10g024680 [Sorghum bicolor]	Phyllostachys edulis cDNA clone: bphyem201a24, full insert sequence	Tryptophan synthase beta chain 2 OS=Thermotoga maritima GN=trpB2 PE=3 SV=1	Putative uncharacterized protein Sb10g024680 OS=Sorghum bicolor GN=Sb10g024680 PE=3 SV=1
Munro_Bamboo_unigene_BMK_41077; 1; bphyem102g09; -1; bphyem212b04; -1	Zn-dependent hydrolases, including glyoxylases	General function prediction only		--	--	hypothetical protein	--	hypothetical protein SORBIDRAFT_04g038260 [Sorghum bicolor] gb|EES07812.1| hypothetical protein SORBIDRAFT_04g038260 [Sorghum bicolor]	Phyllostachys edulis cDNA clone: bphyem102g09, full insert sequence	--	Putative uncharacterized protein Sb04g038260 OS=Sorghum bicolor GN=Sb04g038260 PE=4 SV=1
Munro_Bamboo_unigene_BMK_4112; 1; bphylf059l24; 1	Serine/threonine protein kinase	--		Biological Process: metabolic process (GO:0008152);; Biological Process: protein phosphorylation (GO:0006468);	Molecular Function: ATP binding (GO:0005524);	Molecular Function: amino acid binding (GO:0016597);	Molecular Function: protein kinase activity (GO:0004672);	Molecular Function: protein serine/threonine kinase activity (GO:0004674);	Molecular Function: protein tyrosine kinase activity (GO:0004713);	Molecular Function: transferase activity, transferring phosphorus-containing groups (GO:0016772);	IPR000719: Protein kinase, catalytic domain; IPR001245: Serine-threonine/tyrosine-protein kinase	IPR002290: Serine/threonine-protein kinase, catalytic  domain	IPR002912: Amino acid-binding ACT	IPR008271: Serine/threonine-protein kinase, active site	IPR011009: Protein kinase-like domain	IPR020635: Tyrosine-protein kinase, catalytic domain	hypothetical protein LOC100273787	--	hypothetical protein OsJ_35327 [Oryza sativa Japonica Group]	Phyllostachys edulis cDNA clone: bphylf059l24, full insert sequence	Serine/threonine-protein kinase HT1 OS=Arabidopsis thaliana GN=HT1 PE=1 SV=1	Protein kinase family protein, putative, expressed OS=Oryza sativa subsp. japonica GN=LOC_Os12g06670 PE=2 SV=1
Munro_Bamboo_unigene_BMK_41203; 1; bphylf025i08; -1; bphylf044n02; -1	--	--	Molecular Function: protein binding (GO:0005515);	IPR006652: Kelch repeat type 1; IPR015916: Galactose oxidase, beta-propeller	Os02g0114600	--	hypothetical protein OsI_05568 [Oryza sativa Indica Group]	Phyllostachys edulis cDNA clone: bphylf044n02, full insert sequence	F-box/kelch-repeat protein SKIP4 OS=Arabidopsis thaliana GN=SKIP4 PE=1 SV=1	Putative SKP1 interacting partner OS=Oryza sativa subsp. japonica GN=P0036E06.16 PE=4 SV=1
Munro_Bamboo_unigene_BMK_41208; 1; bphyem203n02; -1	F0F1-type ATP synthase, beta subunit	Energy production and conversion		--	--	csu849(atpb), ATPB; LOC542267 (EC:3.6.3.14); K02133 F-type H+-transporting ATPase subunit beta [EC:3.6.3.14]	Metabolism; Energy Metabolism; Oxidative phosphorylation [PATH:ko00190] Human Diseases; Neurodegenerative Diseases; Alzheimer's disease [PATH:ko05010] Human Diseases; Neurodegenerative Diseases; Parkinson's disease [PATH:ko05012] Human Diseases; Neurodegenerative Diseases; Huntington's disease [PATH:ko05016]	hypothetical protein OsI_03305 [Oryza sativa Indica Group]	Phyllostachys edulis cDNA clone: bphyem203n02, full insert sequence	ATP synthase subunit beta, mitochondrial OS=Oryza sativa subsp. japonica GN=ATPB PE=1 SV=2	ATP synthase subunit beta OS=Oryza sativa subsp. japonica GN=Os01g0685800 PE=3 SV=1
Munro_Bamboo_unigene_BMK_41218; 1; bphylf032f15; 1	--	--	--	--	Os02g0742000	--	Os02g0742000 [Oryza sativa Japonica Group] dbj|BAD15732.1| putative serine-threonine rich antigen [Oryza sativa Japonica Group] dbj|BAD15775.1| putative serine-threonine rich antigen [Oryza sativa Japonica Group] dbj|BAF10000.1| Os02g0742000 [Oryza sativa Japonica Group]	Phyllostachys edulis cDNA clone: bphylf032f15, full insert sequence	--	Os02g0742000 protein OS=Oryza sativa subsp. japonica GN=P0516G10.37-1 PE=4 SV=1
Munro_Bamboo_unigene_BMK_4128; 1; bphyem204l18; -1	Succinate dehydrogenase/fumarate reductase, flavoprotein subunit	Energy production and conversion		Biological Process: oxidation-reduction process (GO:0055114);; Molecular Function: electron carrier activity (GO:0009055);	Molecular Function: oxidoreductase activity (GO:0016491);	IPR003953: Fumarate reductase/succinate dehydrogenase flavoprotein, N-terminal; IPR004112: Fumarate reductase/succinate dehydrogenase flavoprotein, C-terminal	IPR015939: Fumarate reductase/succinate dehydrogenase flavoprotein-like, C-terminal	hypothetical protein; K00234 succinate dehydrogenase (ubiquinone) flavoprotein subunit [EC:1.3.5.1]	Metabolism; Carbohydrate Metabolism; Citrate cycle (TCA cycle) [PATH:ko00020] Metabolism; Energy Metabolism; Oxidative phosphorylation [PATH:ko00190] Human Diseases; Neurodegenerative Diseases; Alzheimer's disease [PATH:ko05010] Human Diseases; Neurodegenerative Diseases; Parkinson's disease [PATH:ko05012] Human Diseases; Neurodegenerative Diseases; Huntington's disease [PATH:ko05016]	hypothetical protein SORBIDRAFT_01g006490 [Sorghum bicolor] gb|EER90804.1| hypothetical protein SORBIDRAFT_01g006490 [Sorghum bicolor]	Phyllostachys edulis cDNA clone: bphyem204l18, full insert sequence	Succinate dehydrogenase [ubiquinone] flavoprotein subunit 1, mitochondrial OS=Arabidopsis thaliana GN=SDH1-1 PE=1 SV=1	Putative uncharacterized protein Sb01g006490 OS=Sorghum bicolor GN=Sb01g006490 PE=4 SV=1
Munro_Bamboo_unigene_BMK_41314; 1; Munro_Bamboo_unigene_BMK_65818; 1; bphylf033i18; -1; bphylf050g04; -1	Chaperonin GroEL (HSP60 family)	Posttranslational modification, protein turnover, chaperones		Biological Process: cellular protein metabolic process (GO:0044267);; Biological Process: protein folding (GO:0006457);	Molecular Function: ATP binding (GO:0005524);	Molecular Function: unfolded protein binding (GO:0051082);	IPR002423: Chaperonin Cpn60/TCP-1; IPR012717: T-complex protein 1, delta subunit	Os02g0332200; K09496 T-complex protein 1 subunit delta	Genetic Information Processing; Folding, Sorting and Degradation; Chaperones and folding catalysts [BR:ko03110]	hypothetical protein OsI_29091 [Oryza sativa Indica Group]	Phyllostachys edulis cDNA clone: bphylf033i18, full insert sequence	T-complex protein 1 subunit delta OS=Homo sapiens GN=CCT4 PE=1 SV=4	T-complex protein 1 subunit delta OS=Oryza sativa subsp. japonica GN=OSJNBb0037J12.26 PE=2 SV=1
Munro_Bamboo_unigene_BMK_4135; 1; bphylf058k08; 1	Translation initiation factor 2, alpha subunit (eIF-2alpha)	Translation, ribosomal structure and biogenesis		Cellular Component: eukaryotic translation initiation factor 2 complex (GO:0005850);; Molecular Function: RNA binding (GO:0003723);	Molecular Function: translation initiation factor activity (GO:0003743);	IPR003029: Ribosomal protein S1, RNA-binding domain; IPR011488: Translation initiation factor 2, alpha subunit	IPR012340: Nucleic acid-binding, OB-fold	IPR016027: Nucleic acid-binding, OB-fold-like	IPR022967: RNA-binding domain, S1	IPR024054: Translation initiation factor 2, alpha subunit, middle domain	IPR024055: Translation initiation factor 2, alpha subunit, C-terminal	Os03g0296400; K03237 translation initiation factor eIF-2 alpha subunit	Genetic Information Processing; Translation; Translation factors [BR:ko03012] Genetic Information Processing; Translation; RNA transport [PATH:ko03013] Genetic Information Processing; Folding, Sorting and Degradation; Protein processing in endoplasmic reticulum [PATH:ko04141] Human Diseases; Infectious Diseases; Measles [PATH:ko05162] Human Diseases; Infectious Diseases; Hepatitis C [PATH:ko05160]	Os03g0296400 [Oryza sativa Japonica Group] gb|ABF95443.1| Eukaryotic translation initiation factor 2 alpha subunit family protein, expressed [Oryza sativa Japonica Group] dbj|BAF11743.1| Os03g0296400 [Oryza sativa Japonica Group] gb|EAZ26588.1| hypothetical protein OsJ_10487 [Oryza sativa Japonica Group] dbj|BAG96455.1| unnamed protein product [Oryza sativa Japonica Group] dbj|BAG93463.1| unnamed protein product [Oryza sativa Japonica Group]	Phyllostachys edulis cDNA clone: bphylf058k08, full insert sequence	Eukaryotic translation initiation factor 2 subunit alpha OS=Schizosaccharomyces pombe GN=tif211 PE=1 SV=1	Eukaryotic translation initiation factor 2 alpha subunit family protein, expressed OS=Oryza sativa subsp. japonica GN=Os03g0296400 PE=2 SV=1
Munro_Bamboo_unigene_BMK_41351; 1; bphylf056i18; -1	--	--	--	--	Os04g0605100	--	WRKY68-b transcription factor [Triticum aestivum]	Phyllostachys edulis cDNA clone: bphylf056i18, full insert sequence	Probable WRKY transcription factor 17 OS=Arabidopsis thaliana GN=WRKY17 PE=1 SV=2	WRKY68-b transcription factor OS=Triticum aestivum GN=WRKY68-b PE=4 SV=1
Munro_Bamboo_unigene_BMK_41462; 1; bphylf047j18; -1	Thiol-disulfide isomerase and thioredoxins	--		--	--	Os01g0339900; K09584 protein disulfide-isomerase A6 [EC:5.3.4.1]	Genetic Information Processing; Folding, Sorting and Degradation; Chaperones and folding catalysts [BR:ko03110] Genetic Information Processing; Folding, Sorting and Degradation; Protein processing in endoplasmic reticulum [PATH:ko04141]	Os01g0339900 [Oryza sativa Japonica Group] sp|Q942L2.1|PDI22_ORYSJ RecName: Full=Protein disulfide isomerase-like 2-2; Short=OsPDIL2-2; AltName: Full=Protein disulfide isomerase-like 4-2; Short=OsPDIL4-2; Flags: Precursor dbj|BAB67990.1| putative protein disulfide-isomerase TIGA precursor [Oryza sativa Japonica Group] dbj|BAF04863.1| Os01g0339900 [Oryza sativa Japonica Group] gb|EAY73875.1| hypothetical protein OsI_01755 [Oryza sativa Indica Group] gb|EAZ11750.1| hypothetical protein OsJ_01619 [Oryza sativa Japonica Group] dbj|BAG89827.1| unnamed protein product [Oryza sativa Japonica Group]	Phyllostachys edulis cDNA clone: bphylf047j18, full insert sequence	Protein disulfide isomerase-like 2-2 OS=Oryza sativa subsp. japonica GN=PDIL2-2 PE=2 SV=1	Putative uncharacterized protein OS=Oryza sativa subsp. indica GN=OsI_01755 PE=3 SV=1
Munro_Bamboo_unigene_BMK_41482; 1; bphyst033p20; -1	--	--	--	--	Os08g0112800	--	hypothetical protein OsI_27576 [Oryza sativa Indica Group]	Phyllostachys edulis cDNA clone: bphyst033p20, full insert sequence	Putative protein TPRXL OS=Homo sapiens GN=TPRXL PE=5 SV=2	Putative uncharacterized protein OS=Oryza sativa subsp. indica GN=OsI_27576 PE=4 SV=1
Munro_Bamboo_unigene_BMK_41580; 1; bphyst011e12; -1; bphyst022g02; -1	Ribosomal protein S24E	Translation, ribosomal structure and biogenesis		--	--	Os01g0723200	--	Os01g0723200 [Oryza sativa Japonica Group] dbj|BAB84441.1| putative ribosomal protein S24 [Oryza sativa Japonica Group] dbj|BAB89495.1| putative ribosomal protein S24 [Oryza sativa Japonica Group] dbj|BAF06020.1| Os01g0723200 [Oryza sativa Japonica Group] gb|EAY75664.1| hypothetical protein OsI_03571 [Oryza sativa Indica Group] dbj|BAG88867.1| unnamed protein product [Oryza sativa Japonica Group] dbj|BAH00814.1| unnamed protein product [Oryza sativa Japonica Group]	Phyllostachys edulis cDNA clone: bphyst011e12, full insert sequence	40S ribosomal protein S24-1 OS=Arabidopsis thaliana GN=RPS24A PE=2 SV=1	40S ribosomal protein S24 OS=Oryza sativa subsp. japonica GN=P0690B02.40 PE=2 SV=1
Munro_Bamboo_unigene_BMK_4162; 1; bphylf025e24; 1; bphylf039i14; 1; bphylf053n17; 1; bphyst005p10; 1; bphyst017p10; 1	--	--	Molecular Function: RNA binding (GO:0003723);	IPR004087: K Homology; IPR004088: K Homology, type 1	IPR018111: K Homology, type 1, subgroup	hypothetical protein	--	KH domain-containing protein NOVA-like [Oryza sativa Japonica Group] dbj|BAD23125.1| KH domain-containing protein NOVA-like [Oryza sativa Japonica Group]	Phyllostachys edulis cDNA clone: bphylf053n17, full insert sequence	RNA-binding protein Nova-1 (Fragment) OS=Rattus norvegicus GN=Nova1 PE=2 SV=1	KH domain-containing protein NOVA-like OS=Oryza sativa subsp. japonica GN=P0474F11.35 PE=4 SV=1
Munro_Bamboo_unigene_BMK_41625; 1; bphylf026j15; -1; bphylf046m22; -1; bphyst026a19; -1	Uncharacterized enzymes related to aldose 1-epimerase	Carbohydrate transport and metabolism		Biological Process: carbohydrate metabolic process (GO:0005975);; Molecular Function: carbohydrate binding (GO:0030246);	Molecular Function: catalytic activity (GO:0003824);	Molecular Function: isomerase activity (GO:0016853);	IPR008183: Aldose 1-epimerase; IPR011013: Glycoside hydrolase-type carbohydrate-binding	IPR014718: Glycoside hydrolase-type carbohydrate-binding, subgroup	Os09g0327400	--	Os09g0327400 [Oryza sativa Japonica Group] dbj|BAD23600.1| apospory-associated protein C-like [Oryza sativa Japonica Group] dbj|BAF24804.1| Os09g0327400 [Oryza sativa Japonica Group] dbj|BAG91026.1| unnamed protein product [Oryza sativa Japonica Group]	Phyllostachys edulis cDNA clone: bphylf026j15, full insert sequence	Putative glucose-6-phosphate 1-epimerase OS=Cenchrus ciliaris PE=2 SV=1	Apospory-associated protein C-like OS=Oryza sativa subsp. japonica GN=P0706E03.9 PE=2 SV=1
Munro_Bamboo_unigene_BMK_41723; 1; bphylf024e07; -1; bphyst022a10; -1	--	--	--	--	Os07g0141400; K02717 photosystem II oxygen-evolving enhancer protein 2	Metabolism; Energy Metabolism; Photosynthesis [PATH:ko00195] Metabolism; Energy Metabolism; Photosynthesis proteins [BR:ko00194]	Os07g0141400 [Oryza sativa Japonica Group] gb|AAC98778.1| 23 kDa polypeptide of photosystem II [Oryza sativa Japonica Group] dbj|BAC21393.1| probable photosystem II oxygen-evolving complex protein 2 precursor [Oryza sativa Japonica Group] dbj|BAF20777.1| Os07g0141400 [Oryza sativa Japonica Group] gb|EAZ02732.1| hypothetical protein OsI_24850 [Oryza sativa Indica Group] gb|EAZ38656.1| hypothetical protein OsJ_23049 [Oryza sativa Japonica Group] dbj|BAG89433.1| unnamed protein product [Oryza sativa Japonica Group] dbj|BAG96904.1| unnamed protein product [Oryza sativa Japonica Group]	Phyllostachys edulis cDNA clone: bphyst022a10, full insert sequence	Oxygen-evolving enhancer protein 2, chloroplastic OS=Triticum aestivum GN=PSBP PE=2 SV=1	Os07g0141400 protein OS=Oryza sativa subsp. japonica GN=OJ1351_C05.112 PE=2 SV=1
Munro_Bamboo_unigene_BMK_41724; 1; bphyst014n10; -1	--	--	--	--	Os05g0423400	--	hypothetical protein OsI_20021 [Oryza sativa Indica Group] gb|EEE63776.1| hypothetical protein OsJ_18598 [Oryza sativa Japonica Group]	Phyllostachys edulis cDNA clone: bphyst014n10, full insert sequence	MADS-box transcription factor 4 OS=Oryza sativa subsp. japonica GN=MADS4 PE=1 SV=3	Os05g0423400 protein OS=Oryza sativa subsp. japonica GN=Os05g0423400 PE=2 SV=1
Munro_Bamboo_unigene_BMK_4179; 1; bphylf032d01; 1	Predicted membrane protein	Function unknown		--	--	hypothetical protein	--	hypothetical protein SORBIDRAFT_07g021180 [Sorghum bicolor] gb|EES15039.1| hypothetical protein SORBIDRAFT_07g021180 [Sorghum bicolor]	Phyllostachys edulis cDNA clone: bphylf032d01, full insert sequence	UPF0016 protein 5 OS=Oryza sativa subsp. japonica GN=Os08g0433100 PE=2 SV=1	Putative uncharacterized protein Sb07g021180 OS=Sorghum bicolor GN=Sb07g021180 PE=4 SV=1
Munro_Bamboo_unigene_BMK_41941; 1; bphyem206o17; -1	--	--	--	--	hypothetical protein; K12611 mRNA-decapping enzyme 1B [EC:3.-.-.-]	Genetic Information Processing; Folding, Sorting and Degradation; RNA degradation [PATH:ko03018]	hypothetical protein SORBIDRAFT_02g007770 [Sorghum bicolor] gb|EER98290.1| hypothetical protein SORBIDRAFT_02g007770 [Sorghum bicolor]	Phyllostachys edulis cDNA clone: bphyem206o17, full insert sequence	mRNA-decapping enzyme-like protein OS=Arabidopsis thaliana GN=At1g08370 PE=2 SV=2	Os07g0249600 protein OS=Oryza sativa subsp. japonica GN=P0021G06.113 PE=2 SV=1
Munro_Bamboo_unigene_BMK_4195; 1; bphyem208i04; -1	Glycine/serine hydroxymethyltransferase	Amino acid transport and metabolism		Biological Process: L-serine metabolic process (GO:0006563);; Biological Process: glycine metabolic process (GO:0006544);	Molecular Function: catalytic activity (GO:0003824);	Molecular Function: glycine hydroxymethyltransferase activity (GO:0004372);	Molecular Function: pyridoxal phosphate binding (GO:0030170);	IPR001085: Serine hydroxymethyltransferase; IPR015421: Pyridoxal phosphate-dependent transferase, major region, subdomain 1	IPR015422: Pyridoxal phosphate-dependent transferase, major region, subdomain 2	IPR015424: Pyridoxal phosphate-dependent transferase, major domain	IPR019798: Serine hydroxymethyltransferase, pyridoxal phosphate binding site	Os03g0738400; K00600 glycine hydroxymethyltransferase [EC:2.1.2.1]	Metabolism; Energy Metabolism; Methane metabolism [PATH:ko00680] Metabolism; Amino Acid Metabolism; Glycine, serine and threonine metabolism [PATH:ko00260] Metabolism; Metabolism of Other Amino Acids; Cyanoamino acid metabolism [PATH:ko00460] Metabolism; Metabolism of Cofactors and Vitamins; One carbon pool by folate [PATH:ko00670]	putative glycine hydroxymethyltransferase [Oryza sativa Japonica Group]	Phyllostachys edulis cDNA clone: bphyem208i04, full insert sequence	Serine hydroxymethyltransferase, mitochondrial OS=Arabidopsis thaliana GN=SHM1 PE=1 SV=1	Serine hydroxymethyltransferase OS=Oryza sativa subsp. japonica GN=OSJNBa0057G07.17 PE=3 SV=1
Munro_Bamboo_unigene_BMK_4216; 1; bphyem202b12; 1	--	--	--	--	hypothetical protein LOC100381781	--	hypothetical protein OsI_20453 [Oryza sativa Indica Group]	Phyllostachys edulis cDNA clone: bphyem202b12, full insert sequence	Probable sugar phosphate/phosphate translocator At5g25400 OS=Arabidopsis thaliana GN=At5g25400 PE=2 SV=1	Os05g0494500 protein OS=Oryza sativa subsp. japonica GN=OJ1579_G03.4 PE=2 SV=1
Munro_Bamboo_unigene_BMK_4223; 1; bphyem201l11; 1; bphylf024o15; 1; bphyst016n04; 1	Actin and related proteins	Cytoskeleton		Molecular Function: ATP binding (GO:0005524);	IPR004000: Actin-like; IPR004001: Actin, conserved site	IPR020902: Actin/actin-like conserved site	TIDP3708; LOC100284092	--	LOC100284092 [Zea mays] gb|ACG39191.1| actin-1 [Zea mays]	Phyllostachys edulis cDNA clone: bphylf024o15, full insert sequence	Actin-1 OS=Oryza sativa subsp. japonica GN=ACT1 PE=2 SV=1	Actin-1 OS=Zea mays PE=2 SV=1
Munro_Bamboo_unigene_BMK_42293; 1; bphyem115l15; 1; bphyst009c24; 1; bphyst012g18; 1	--	--	--	--	hypothetical protein; K13464 jasmonate ZIM domain-containing protein	Environmental Information Processing; Signal Transduction; Plant hormone signal transduction [PATH:ko04075] Organismal Systems; Environmental Adaptation; Plant-pathogen interaction [PATH:ko04626]	hypothetical protein SORBIDRAFT_06g031060 [Sorghum bicolor] gb|EES11564.1| hypothetical protein SORBIDRAFT_06g031060 [Sorghum bicolor]	Phyllostachys edulis cDNA clone: bphyem115l15, full insert sequence	Protein TIFY 3B OS=Arabidopsis thaliana GN=TIFY3B PE=1 SV=1	Putative uncharacterized protein Sb06g031060 OS=Sorghum bicolor GN=Sb06g031060 PE=4 SV=1
Munro_Bamboo_unigene_BMK_42310; 1; bphyem126i13; 1	--	--	--	IPR007650: Protein of unknown function DUF581	Os01g0719000	--	Os01g0719000 [Oryza sativa Japonica Group] dbj|BAD87760.1| unknown protein [Oryza sativa Japonica Group] gb|EAZ13347.1| hypothetical protein OsJ_03269 [Oryza sativa Japonica Group] dbj|BAG95346.1| unnamed protein product [Oryza sativa Japonica Group] dbj|BAG87544.1| unnamed protein product [Oryza sativa Japonica Group] dbj|BAF05994.2| Os01g0719000 [Oryza sativa Japonica Group]	Phyllostachys edulis cDNA clone: bphyem126i13, full insert sequence	--	Os01g0719000 protein OS=Oryza sativa subsp. japonica GN=P0480C01.26 PE=2 SV=1
Munro_Bamboo_unigene_BMK_4232; 1; bphyem203j22; 1	--	--	--	--	Os03g0147400	--	Os03g0147400 [Oryza sativa Japonica Group] gb|AAK98727.1|AC090485_6 Putative anion transporter [Oryza sativa Japonica Group] gb|ABF93977.1| transmembrane protein, putative, expressed [Oryza sativa Japonica Group] gb|ABF93978.1| transmembrane protein, putative, expressed [Oryza sativa Japonica Group] gb|ABF93979.1| transmembrane protein, putative, expressed [Oryza sativa Japonica Group] gb|ABF93980.1| transmembrane protein, putative, expressed [Oryza sativa Japonica Group] dbj|BAF10876.1| Os03g0147400 [Oryza sativa Japonica Group] gb|EAY88547.1| hypothetical protein OsI_10021 [Oryza sativa Indica Group] gb|EAZ25582.1| hypothetical protein OsJ_09409 [Oryza sativa Japonica Group]	Phyllostachys edulis cDNA clone: bphyem203j22, full insert sequence	Putative transporter arsB OS=Dictyostelium discoideum GN=arsB PE=2 SV=1	Putative anion transporter OS=Oryza sativa GN=OSJNBa0067N01.6 PE=4 SV=1
Munro_Bamboo_unigene_BMK_4234; 1; bphylf029a11; -1	Fructose-1,6-bisphosphate aldolase	Carbohydrate transport and metabolism		Biological Process: glycolysis (GO:0006096);; Biological Process: metabolic process (GO:0008152);	Molecular Function: catalytic activity (GO:0003824);	Molecular Function: fructose-bisphosphate aldolase activity (GO:0004332);	IPR000741: Fructose-bisphosphate aldolase, class-I; IPR013785: Aldolase-type TIM barrel	Os11g0171300; K01623 fructose-bisphosphate aldolase, class I [EC:4.1.2.13]	Metabolism; Carbohydrate Metabolism; Glycolysis / Gluconeogenesis [PATH:ko00010] Metabolism; Carbohydrate Metabolism; Pentose phosphate pathway [PATH:ko00030] Metabolism; Carbohydrate Metabolism; Fructose and mannose metabolism [PATH:ko00051] Metabolism; Energy Metabolism; Carbon fixation in photosynthetic organisms [PATH:ko00710]	fructose-bisphosphate aldolase [Zea mays]	Phyllostachys edulis cDNA clone: bphylf029a11, full insert sequence	Fructose-bisphosphate aldolase, chloroplastic OS=Oryza sativa subsp. japonica GN=Os11g0171300 PE=1 SV=2	Fructose-bisphosphate aldolase OS=Oryza sativa subsp. japonica GN=LOC_Os11g07020 PE=3 SV=1
Munro_Bamboo_unigene_BMK_4238; 1; bphyem113g14; -1	20S proteasome, alpha and beta subunits	Posttranslational modification, protein turnover, chaperones		Biological Process: proteolysis involved in cellular protein catabolic process (GO:0051603);; Biological Process: ubiquitin-dependent protein catabolic process (GO:0006511);	Cellular Component: proteasome core complex (GO:0005839);	Cellular Component: proteasome core complex, alpha-subunit complex (GO:0019773);	Molecular Function: endopeptidase activity (GO:0004175);	Molecular Function: threonine-type endopeptidase activity (GO:0004298);	IPR000426: Proteasome, alpha-subunit, conserved site; IPR001353: Proteasome, subunit alpha/beta	IPR023332: Proteasome A-type subunit	Os01g0811100; K02727 20S proteasome subunit alpha 7 [EC:3.4.25.1]	Metabolism; Enzyme Families; Peptidases [BR:ko01002] Genetic Information Processing; Folding, Sorting and Degradation; Proteasome [PATH:ko03050] Genetic Information Processing; Folding, Sorting and Degradation; Proteasome [BR:ko03051]	unknown [Hordeum vulgare]	Phyllostachys edulis cDNA clone: bphyem113g14, full insert sequence	Proteasome subunit alpha type-3 OS=Oryza sativa subsp. japonica GN=PAG1 PE=2 SV=1	Proteasome subunit alpha type OS=Hordeum vulgare PE=3 SV=1
Munro_Bamboo_unigene_BMK_42436; 1; bphylf055k11; 1	--	--	Molecular Function: protein binding (GO:0005515);; Molecular Function: zinc ion binding (GO:0008270);	IPR001841: Zinc finger, RING-type; IPR013083: Zinc finger, RING/FYVE/PHD-type	IPR018957: Zinc finger, C3HC4 RING-type	Os08g0539300	--	Os08g0539300 [Oryza sativa Japonica Group] dbj|BAD33143.1| putative VIP2 protein [Oryza sativa Japonica Group] dbj|BAF24290.1| Os08g0539300 [Oryza sativa Japonica Group] gb|EEE69078.1| hypothetical protein OsJ_28112 [Oryza sativa Japonica Group]	Phyllostachys edulis cDNA clone: bphylf055k11, full insert sequence	--	Os08g0539300 protein OS=Oryza sativa subsp. japonica GN=P0666G10.111 PE=4 SV=1
Munro_Bamboo_unigene_BMK_4250; 1; bphyst003n09; -1	Carbonic anhydrases/acetyltransferases, isoleucine patch superfamily	General function prediction only		Molecular Function: transferase activity (GO:0016740);	IPR001451: Bacterial transferase hexapeptide repeat; IPR011004: Trimeric LpxA-like	Os12g0169700	--	Os12g0169700 [Oryza sativa Japonica Group] gb|ABA95932.1| expressed protein [Oryza sativa Japonica Group] dbj|BAF29284.1| Os12g0169700 [Oryza sativa Japonica Group] gb|EAY82406.1| hypothetical protein OsI_37621 [Oryza sativa Indica Group] gb|EAZ19787.1| hypothetical protein OsJ_35366 [Oryza sativa Japonica Group] dbj|BAG96313.1| unnamed protein product [Oryza sativa Japonica Group]	Phyllostachys edulis cDNA clone: bphyst003n09, full insert sequence	Uncharacterized protein DDB_G0288155 OS=Dictyostelium discoideum GN=DDB_G0288155 PE=1 SV=1	Expressed protein OS=Oryza sativa subsp. japonica GN=Os12g0169700 PE=2 SV=1
Munro_Bamboo_unigene_BMK_42513; 1; bphyem124o13; 1	--	--	--	--	hypothetical protein	--	hypothetical protein OsI_06709 [Oryza sativa Indica Group]	Phyllostachys edulis cDNA clone: bphyem124o13, full insert sequence	--	Putative uncharacterized protein P0521F09.19 OS=Oryza sativa subsp. japonica GN=P0521F09.19 PE=4 SV=1
Munro_Bamboo_unigene_BMK_4261; 1; bphylf041k13; -1	--	--	Molecular Function: catalytic activity (GO:0003824);	IPR001932: Protein phosphatase 2C-like; IPR015655: Protein phosphatase 2C	Os04g0609600	--	Os04g0609600 [Oryza sativa Japonica Group] sp|Q0JAA0.1|P2C44_ORYSJ RecName: Full=Probable protein phosphatase 2C 44; Short=OsPP2C44 dbj|BAF15737.1| Os04g0609600 [Oryza sativa Japonica Group] gb|EEC77968.1| hypothetical protein OsI_17335 [Oryza sativa Indica Group] gb|EEE61653.1| hypothetical protein OsJ_16105 [Oryza sativa Japonica Group]	Phyllostachys edulis cDNA clone: bphylf041k13, full insert sequence	Probable protein phosphatase 2C 44 OS=Oryza sativa subsp. japonica GN=Os04g0609600 PE=2 SV=1	Putative uncharacterized protein OS=Oryza sativa subsp. japonica GN=OsJ_16105 PE=4 SV=1
Munro_Bamboo_unigene_BMK_42619; 1; bphylf051j20; -1	--	--	--	--	hypothetical protein; K14486 auxin response factor	Environmental Information Processing; Signal Transduction; Plant hormone signal transduction [PATH:ko04075]	hypothetical protein SORBIDRAFT_09g028450 [Sorghum bicolor] gb|EES18676.1| hypothetical protein SORBIDRAFT_09g028450 [Sorghum bicolor]	Phyllostachys edulis cDNA clone: bphylf051j20, full insert sequence	Auxin response factor 15 OS=Oryza sativa subsp. japonica GN=ARF15 PE=2 SV=1	Putative uncharacterized protein Sb09g028450 OS=Sorghum bicolor GN=Sb09g028450 PE=4 SV=1
Munro_Bamboo_unigene_BMK_4263; 1; bphyem212k08; -1	--	--	Biological Process: proteolysis (GO:0006508);; Molecular Function: cysteine-type endopeptidase activity (GO:0004197);	Molecular Function: cysteine-type peptidase activity (GO:0008234);	IPR000118: Granulin; IPR000169: Peptidase, cysteine peptidase active site	IPR000668: Peptidase C1A, papain C-terminal	IPR013128: Peptidase C1A, papain	IPR013201: Proteinase inhibitor I29, cathepsin propeptide	cysteine protease 1	--	cysteine protease 1 [Zea mays] gb|ACG32602.1| cysteine protease 1 precursor [Zea mays]	Phyllostachys edulis cDNA clone: bphyem212k08, full insert sequence	Oryzain alpha chain OS=Oryza sativa subsp. japonica GN=Os04g0650000 PE=1 SV=2	Cysteine protease 1 OS=Zea mays PE=2 SV=1
Munro_Bamboo_unigene_BMK_42662; 1; bphylf028f04; 1	--	--	--	IPR018108: Mitochondrial substrate/solute carrier; IPR023395: Mitochondrial carrier domain	Os05g0208000	--	Os05g0208000 [Oryza sativa Japonica Group] gb|AAU90190.1| putative 2-oxoglutarate/malate translocator [Oryza sativa Japonica Group] dbj|BAF16818.1| Os05g0208000 [Oryza sativa Japonica Group] gb|EAY96938.1| hypothetical protein OsI_18855 [Oryza sativa Indica Group] dbj|BAG92525.1| unnamed protein product [Oryza sativa Japonica Group] dbj|BAG87052.1| unnamed protein product [Oryza sativa Japonica Group]	Phyllostachys edulis cDNA clone: bphylf028f04, full insert sequence	Putative mitochondrial 2-oxoglutarate/malate carrier protein OS=Neurospora crassa GN=NCU10732 PE=3 SV=1	Os05g0208000 protein OS=Oryza sativa subsp. japonica GN=OJ1430_B02.7 PE=2 SV=1
Munro_Bamboo_unigene_BMK_4268; 1; bphyst008b13; -1	--	--	--	--	hypothetical protein; K03259 translation initiation factor eIF-4E	Genetic Information Processing; Translation; Translation factors [BR:ko03012] Genetic Information Processing; Translation; RNA transport [PATH:ko03013] Environmental Information Processing; Signal Transduction; mTOR signaling pathway [PATH:ko04150] Organismal Systems; Endocrine System; Insulin signaling pathway [PATH:ko04910]	Os01g0970400 [Oryza sativa Japonica Group] sp|P48599.1|IF4E1_ORYSJ RecName: Full=Eukaryotic translation initiation factor 4E-1; Short=eIF-4E-1; Short=eIF4E-1; AltName: Full=eIF-4F 25 kDa subunit; AltName: Full=eIF-4F p26 subunit; AltName: Full=mRNA cap-binding protein gb|AAB40348.1| p26 [Oryza sativa Japonica Group] dbj|BAB85343.1| putative translation initiation factor eIF-4F chain p26 [Oryza sativa Japonica Group] dbj|BAF07439.1| Os01g0970400 [Oryza sativa Japonica Group] emb|CAL69634.1| putative eIF4E [Oryza sativa Indica Group] emb|CAL69635.1| putative eIF4E [Oryza sativa Japonica Group] dbj|BAG91316.1| unnamed protein product [Oryza sativa Japonica Group] dbj|BAG93969.1| unnamed protein product [Oryza sativa Japonica Group] gb|EEC72248.1| hypothetical protein OsI_05376 [Oryza sativa Indica Group] gb|EEE56085.1| hypothetical protein OsJ_04917 [Oryza sativa Japonica Group]	Phyllostachys edulis cDNA clone: bphyst008b13, full insert sequence	Eukaryotic translation initiation factor 4E-1 OS=Oryza sativa subsp. japonica GN=Os01g0970400 PE=2 SV=1	Os01g0970400 protein OS=Oryza sativa subsp. japonica GN=Os01g0970400 PE=2 SV=1
Munro_Bamboo_unigene_BMK_4271; 1; bphylf037o20; 1	Geranylgeranyl pyrophosphate synthase	Coenzyme transport and metabolism		Biological Process: isoprenoid biosynthetic process (GO:0008299);	IPR000092: Polyprenyl synthetase; IPR008949: Terpenoid synthase	hypothetical protein; K00787 farnesyl diphosphate synthase [EC:2.5.1.1 2.5.1.10]	Metabolism; Metabolism of Terpenoids and Polyketides; Prenyltransferases [BR:ko01006] Metabolism; Metabolism of Terpenoids and Polyketides; Terpenoid backbone biosynthesis	hypothetical protein SORBIDRAFT_03g032280 [Sorghum bicolor] gb|EES01337.1| hypothetical protein SORBIDRAFT_03g032280 [Sorghum bicolor]	Phyllostachys edulis cDNA clone: bphylf037o20, full insert sequence	Farnesyl pyrophosphate synthase OS=Zea mays GN=FPS PE=2 SV=1	Farnesyl diphosphate synthase OS=Oryza sativa subsp. japonica GN=Os01g0703400 PE=2 SV=1
Munro_Bamboo_unigene_BMK_4273; 1; bphylf003c20; 1; bphylf033i22; 1; bphyst007l18; 1	--	--	--	IPR005735: Zinc finger, LSD1-type	Os08g0159500	--	Os08g0159500 [Oryza sativa Japonica Group] dbj|BAF22956.1| Os08g0159500 [Oryza sativa Japonica Group] dbj|BAG99402.1| unnamed protein product [Oryza sativa Japonica Group]	Phyllostachys edulis cDNA clone: bphylf033i22, full insert sequence	--	Os08g0159500 protein OS=Oryza sativa subsp. japonica GN=Os08g0159500 PE=2 SV=1
Munro_Bamboo_unigene_BMK_4276; 1; bphylf027f16; 1	20S proteasome, alpha and beta subunits	Posttranslational modification, protein turnover, chaperones		Biological Process: proteolysis involved in cellular protein catabolic process (GO:0051603);; Biological Process: ubiquitin-dependent protein catabolic process (GO:0006511);	Cellular Component: proteasome core complex (GO:0005839);	Cellular Component: proteasome core complex, alpha-subunit complex (GO:0019773);	Molecular Function: endopeptidase activity (GO:0004175);	Molecular Function: threonine-type endopeptidase activity (GO:0004298);	IPR000426: Proteasome, alpha-subunit, conserved site; IPR001353: Proteasome, subunit alpha/beta	IPR023332: Proteasome A-type subunit	Os03g0180400; K02730 20S proteasome subunit alpha 1 [EC:3.4.25.1]	Metabolism; Enzyme Families; Peptidases [BR:ko01002] Genetic Information Processing; Folding, Sorting and Degradation; Proteasome [PATH:ko03050] Genetic Information Processing; Folding, Sorting and Degradation; Proteasome [BR:ko03051]	Os03g0180400 [Oryza sativa Japonica Group] sp|Q9LSU3.1|PSA6_ORYSJ RecName: Full=Proteasome subunit alpha type-6; AltName: Full=20S proteasome alpha subunit A; AltName: Full=20S proteasome subunit alpha-1 dbj|BAA96829.1| alpha 1 subunit of 20S proteasome [Oryza sativa Japonica Group] gb|AAN65435.1| Putative alpha 1 subunit of 20S proteasome [Oryza sativa Japonica Group] gb|AAO13479.1| Putative alpha 1 subunit of 20S proteasome [Oryza sativa Japonica Group] gb|ABF94305.1| Proteasome subunit alpha type 6, putative, expressed [Oryza sativa Japonica Group] dbj|BAF11076.1| Os03g0180400 [Oryza sativa Japonica Group] gb|EAY88785.1| hypothetical protein OsI_10259 [Oryza sativa Indica Group] gb|EAZ25813.1| hypothetical protein OsJ_09653 [Oryza sativa Japonica Group] dbj|BAG94887.1| unnamed protein product [Oryza sativa Japonica Group] dbj|BAG87220.1| unnamed protein product [Oryza sativa Japonica Group] dbj|BAG87278.1| unnamed protein product [Oryza sativa Japonica Group]	Phyllostachys edulis cDNA clone: bphylf027f16, full insert sequence	Proteasome subunit alpha type-6 OS=Oryza sativa subsp. japonica GN=PAA1 PE=2 SV=1	Proteasome subunit alpha type OS=Oryza sativa subsp. japonica GN=Os03g0180400 PE=2 SV=1
Munro_Bamboo_unigene_BMK_42818; 1; bphyem102d11; 1; bphylf030a04; 1; bphyst014a11; 1	--	--	Molecular Function: protein binding (GO:0005515);	IPR001611: Leucine-rich repeat; IPR013210: Leucine-rich repeat-containing N-terminal, type 2	BRASSINOSTEROID INSENSITIVE 1-associated receptor kinase 1	--	unknown [Zea mays]	Phyllostachys edulis cDNA clone: bphyem102d11, full insert sequence	Somatic embryogenesis receptor kinase 1 OS=Arabidopsis thaliana GN=SERK1 PE=1 SV=2	Putative uncharacterized protein OS=Zea mays PE=2 SV=1
Munro_Bamboo_unigene_BMK_4282; 1; bphylf031o01; -1	--	--	Biological Process: regulation of signal transduction (GO:0009966);	IPR007304: TAP42-like protein	Os12g0137500	--	Os12g0137500 [Oryza sativa Japonica Group] gb|ABA95766.1| TAP42-like family protein, expressed [Oryza sativa Japonica Group] dbj|BAF29128.1| Os12g0137500 [Oryza sativa Japonica Group] dbj|BAH01312.1| unnamed protein product [Oryza sativa Japonica Group]	Phyllostachys edulis cDNA clone: bphylf031o01, full insert sequence	PP2A regulatory subunit TAP46 OS=Arabidopsis thaliana GN=TAP46 PE=1 SV=2	Os12g0137500 protein OS=Oryza sativa subsp. japonica GN=Os12g0137500 PE=2 SV=1
Munro_Bamboo_unigene_BMK_43069; 1; bphyem205p14; 1	Molecular chaperone	Posttranslational modification, protein turnover, chaperones		--	--	Os02g0833300; K12183 ESCRT-I complex subunit TSG101	Cellular Processes; Transport and Catabolism; Endocytosis	hypothetical protein OsI_09582 [Oryza sativa Indica Group]	Phyllostachys edulis cDNA clone: bphyem205p14, full insert sequence	Protein ELC OS=Arabidopsis thaliana GN=ELC PE=1 SV=1	Os02g0833300 protein OS=Oryza sativa subsp. japonica GN=OJ1282_E10.10 PE=2 SV=1
Munro_Bamboo_unigene_BMK_43200; 1; bphyem213p06; 1	--	--	--	--	hypothetical protein LOC100273767	--	hypothetical protein LOC100273767 [Zea mays] gb|ACF86778.1| unknown [Zea mays]	Phyllostachys edulis cDNA clone: bphyem213p06, full insert sequence	--	Putative uncharacterized protein OS=Zea mays PE=2 SV=1
Munro_Bamboo_unigene_BMK_43554; 1; bphylf032d05; 1	--	--	--	--	Os05g0501700	--	hypothetical protein OsI_20515 [Oryza sativa Indica Group]	Phyllostachys edulis cDNA clone: bphylf032d05, full insert sequence	Classical arabinogalactan protein 10 OS=Arabidopsis thaliana GN=AGP10 PE=1 SV=1	Os05g0501700 protein OS=Oryza sativa subsp. japonica GN=OSJNBa0017K09.8 PE=2 SV=1
Munro_Bamboo_unigene_BMK_43723; 1; bphyst005e18; -1; bphyst024k21; -1	--	--	--	--	--	--	--	Phyllostachys edulis cDNA clone: bphyst005e18, full insert sequence	--	--
Munro_Bamboo_unigene_BMK_43837; 1; bphylf036h19; 1	Zn-dependent hydrolases, including glyoxylases	General function prediction only		Molecular Function: hydrolase activity (GO:0016787);; Molecular Function: hydroxyacylglutathione hydrolase activity (GO:0004416);	Molecular Function: zinc ion binding (GO:0008270);	IPR001279: Beta-lactamase-like; IPR017782: Hydroxyacylglutathione hydrolase	Os03g0332400; K01069 hydroxyacylglutathione hydrolase [EC:3.1.2.6]	Metabolism; Carbohydrate Metabolism; Pyruvate metabolism [PATH:ko00620]	Os03g0332400 [Oryza sativa Japonica Group] gb|ABF95772.1| Hydroxyacylglutathione hydrolase, putative, expressed [Oryza sativa Japonica Group] dbj|BAF11930.1| Os03g0332400 [Oryza sativa Japonica Group] dbj|BAG95927.1| unnamed protein product [Oryza sativa Japonica Group] gb|EEC75188.1| hypothetical protein OsI_11422 [Oryza sativa Indica Group] gb|EEE59001.1| hypothetical protein OsJ_10718 [Oryza sativa Japonica Group]	Phyllostachys edulis cDNA clone: bphylf036h19, full insert sequence	Hydroxyacylglutathione hydrolase cytoplasmic OS=Arabidopsis thaliana GN=GLX2-2 PE=1 SV=2	Hydroxyacylglutathione hydrolase, putative, expressed OS=Oryza sativa subsp. japonica GN=Os03g0332400 PE=2 SV=1
Munro_Bamboo_unigene_BMK_4384; 1; bphylf028a04; -1	Ribosomal protein L3	Translation, ribosomal structure and biogenesis		Biological Process: translation (GO:0006412);; Cellular Component: intracellular (GO:0005622);	Cellular Component: ribosome (GO:0005840);	Molecular Function: structural constituent of ribosome (GO:0003735);	IPR000597: Ribosomal protein L3; IPR009000: Translation elongation/initiation factor/Ribosomal, beta-barrel	IPR019926: Ribosomal protein L3, conserved site	pco139614b; LOC100192516; K02925 large subunit ribosomal protein L3e	Genetic Information Processing; Translation; Ribosome [PATH:ko03010] Genetic Information Processing; Translation; Ribosome [BR:ko03011]	unknown [Zea mays] gb|ACF85089.1| unknown [Zea mays] gb|ACG25236.1| 60S ribosomal protein L3 [Zea mays] gb|ACG31667.1| 60S ribosomal protein L3 [Zea mays] gb|ACG34933.1| 60S ribosomal protein L3 [Zea mays] gb|ACG40462.1| 60S ribosomal protein L3 [Zea mays]	Phyllostachys edulis cDNA clone: bphylf028a04, full insert sequence	60S ribosomal protein L3 OS=Oryza sativa subsp. japonica GN=RPL3 PE=2 SV=2	60S ribosomal protein L3 OS=Zea mays PE=2 SV=1
Munro_Bamboo_unigene_BMK_43840; 1; bphyem127c12; 1	--	--	Biological Process: peroxisome organization (GO:0007031);; Cellular Component: peroxisomal membrane (GO:0005778);	IPR006845: Pex, N-terminal	Os05g0275700; K06664 peroxin-2	Cellular Processes; Transport and Catabolism; Peroxisome	Os05g0275700 [Oryza sativa Japonica Group] gb|AAT85132.1| putative peroxisome assembly protein 2 [Oryza sativa Japonica Group] dbj|BAF16989.1| Os05g0275700 [Oryza sativa Japonica Group] dbj|BAG99350.1| unnamed protein product [Oryza sativa Japonica Group] gb|EEC78896.1| hypothetical protein OsI_19268 [Oryza sativa Indica Group] gb|EEE63072.1| hypothetical protein OsJ_17880 [Oryza sativa Japonica Group]	Phyllostachys edulis cDNA clone: bphyem127c12, full insert sequence	Peroxisome biogenesis protein 2 OS=Arabidopsis thaliana GN=PEX2 PE=1 SV=1	Os05g0275700 protein OS=Oryza sativa subsp. japonica GN=OSJNBa0018H09.15 PE=2 SV=1
Munro_Bamboo_unigene_BMK_4385; 1; bphyem002h19; 1; bphylf002m02; 1; bphyst005g22; 1	--	--	Biological Process: mitochondrial electron transport, ubiquinol to cytochrome c (GO:0006122);; Molecular Function: ubiquinol-cytochrome-c reductase activity (GO:0008121);	IPR003197: Cytochrome d ubiquinol oxidase, 14kDa subunit	Os07g0205000; K00417 ubiquinol-cytochrome c reductase subunit 7 [EC:1.10.2.2]	Metabolism; Energy Metabolism; Oxidative phosphorylation [PATH:ko00190] Organismal Systems; Circulatory System; Cardiac muscle contraction [PATH:ko04260] Human Diseases; Neurodegenerative Diseases; Alzheimer's disease [PATH:ko05010] Human Diseases; Neurodegenerative Diseases; Parkinson's disease [PATH:ko05012] Human Diseases; Neurodegenerative Diseases; Huntington's disease [PATH:ko05016]	Os07g0205000 [Oryza sativa Japonica Group] dbj|BAF21060.1| Os07g0205000 [Oryza sativa Japonica Group]	Phyllostachys edulis cDNA clone: bphyst005g22, full insert sequence	Cytochrome b-c1 complex subunit 7 OS=Solanum tuberosum PE=1 SV=1	Os07g0205000 protein OS=Oryza sativa subsp. japonica GN=Os07g0205000 PE=4 SV=1
Munro_Bamboo_unigene_BMK_43890; 1; bphylf037g15; -1	--	--	--	--	Os04g0432500	--	hypothetical protein OsI_15947 [Oryza sativa Indica Group]	Phyllostachys edulis cDNA clone: bphylf037g15, full insert sequence	Protein disulfide isomerase-like 5-2 OS=Oryza sativa subsp. japonica GN=PDIL5-2 PE=2 SV=2	H0315E07.1 protein OS=Oryza sativa GN=H0315E07.1 PE=4 SV=1
[truncated: 265,817 more chars]
